# Supplementary material for: An Essential Adaptor for Apicoplast Fission and Inheritance in Malaria Parasites
Source: Research Square preprint supplement (doi:10.21203/rs.3.rs-6457426/v1), 2025-05-05
Supplement: Supplementary file 1 [file 170da10a14565060622325a0.xlsx]

## Sheet: MS_Data
						Total Spectrum Count
						Parental line		Anchor KD		Anchor^Mev KD
						1	2	Anchor KD-1	Anchor KD-2	Anchor^Mev KD-1	Anchor^Mev KD-2
#	Identified Proteins (580)	Accession Number	Alternate ID	Molecular Weight	Protein Grouping Ambiguity	2024_10_295_Absalon_Exploris_25cmES_5uL_OwenLC: 2024_10_295_Absalon_Exploris_25cmES_5uL_OwenLC_3D7_1	2024_10_295_Absalon_Exploris_25cmES_5uL_OwenLC: 2024_10_295_Absalon_Exploris_25cmES_5uL_OwenLC_3D7_2	2024_10_295_Absalon_Exploris_25cmES_5uL_OwenLC: 2024_10_295_Absalon_Exploris_25cmES_5uL_OwenLC_177_1	2024_10_295_Absalon_Exploris_25cmES_5uL_OwenLC: 2024_10_295_Absalon_Exploris_25cmES_5uL_OwenLC_177_2	2024_10_295_Absalon_Exploris_25cmES_5uL_OwenLC: 2024_10_295_Absalon_Exploris_25cmES_5uL_OwenLC_Mev_1	2024_10_295_Absalon_Exploris_25cmES_5uL_OwenLC: 2024_10_295_Absalon_Exploris_25cmES_5uL_OwenLC_Mev_2	-
1	Immunoglobulin kappa constant OS=Mus musculus OX=10090 GN=Igkc PE=1 SV=2	P01837		12 kDa		38	590	509	930	801	880
2	Keratin, type II cytoskeletal 1 OS=Homo sapiens OX=9606 GN=KRT1 PE=1 SV=6	P04264	KRT1	66 kDa	TRUE	45	255	290	395	572	317
30	Serum albumin CONTAMINANT OS=Bos taurus GN=ALB PE=1 SV=4	P02769		69 kDa	TRUE	22	305	364	379	381	320
8	Uncharacterized protein OS=Plasmodium falciparum (isolate 3D7) OX=36329 GN=PF3D7_0613600 PE=4 SV=1	C6KSX8	PF3D7_0613600	124 kDa		0	0	398	498	286	276
3	Keratin, type I cytoskeletal 9 OS=Homo sapiens OX=9606 GN=KRT9 PE=1 SV=3	P35527	KRT9	62 kDa	TRUE	54	203	147	199	419	244
170	Hemoglobin subunit alpha OS=Homo sapiens OX=9606 GN=HBA1 PE=1 SV=2	P69905	HBA1	15 kDa		0	23	181	297	360	334
7	Keratin, type I cytoskeletal 10 OS=Homo sapiens OX=9606 GN=KRT10 PE=1 SV=6	P13645	KRT10	59 kDa	TRUE	9	138	158	191	279	156
171	Hemoglobin subunit beta OS=Homo sapiens OX=9606 GN=HBB PE=1 SV=2	P68871	HBB	16 kDa	TRUE	1	20	219	351	218	219
12	Keratin, type II cytoskeletal 2 epidermal OS=Homo sapiens OX=9606 GN=KRT2 PE=1 SV=2	P35908	KRT2	65 kDa	TRUE	15	135	149	156	225	134
4	Heat shock protein 70 OS=Plasmodium falciparum (isolate 3D7) OX=36329 GN=PF3D7_0818900 PE=3 SV=1	Q8IB24	PF3D7_0818900	74 kDa	TRUE	1	23	124	141	123	98
172	Keratin, type II cytoskeletal 6B OS=Homo sapiens OX=9606 GN=KRT6B PE=1 SV=5	P04259	KRT6B	60 kDa	TRUE	0	46	0	0	333	0
117	Trypsin CONTAMINANT OS=Sus scrofa PE=1 SV=1	P00761		24 kDa		11	105	146	139	101	98
66	60S ribosomal protein L32 OS=Plasmodium falciparum (isolate 3D7) OX=36329 GN=PF3D7_0903900 PE=1 SV=1	Q8I3B0	PF3D7_0903900	16 kDa		4	146	154	151	38	51
173	Hemoglobin subunit delta OS=Homo sapiens OX=9606 GN=HBD PE=1 SV=2	P02042	HBD	16 kDa	TRUE	0	8	94	165	152	150
44	Keratin, type II cytoskeletal 6A OS=Homo sapiens OX=9606 GN=KRT6A PE=1 SV=3	P02538	KRT6A	60 kDa	TRUE	6	36	32	43	325	39
49	40S ribosomal protein S6 OS=Plasmodium falciparum (isolate 3D7) OX=36329 GN=PF3D7_1342000 PE=1 SV=1	Q8IDR9	PF3D7_1342000	35 kDa		2	86	103	93	99	95
174	Keratin, type II cytoskeletal 6C OS=Homo sapiens OX=9606 GN=KRT6C PE=1 SV=3	P48668	KRT6C	60 kDa	TRUE	0	35	0	42	315	38
5	Elongation factor 1-alpha OS=Plasmodium falciparum (isolate 3D7) OX=36329 GN=PF3D7_1357000 PE=3 SV=1	Q8I0P6	PF3D7_1357000	49 kDa	TRUE	3	13	85	92	42	49
175	60S ribosomal protein L27a, putative OS=Plasmodium falciparum (isolate 3D7) OX=36329 GN=PF3D7_0618300 PE=1 SV=1	C6KT23	PF3D7_0618300	17 kDa	TRUE	3	135	85	117	64	52
16	Keratin, type I cytoskeletal 16 OS=Homo sapiens OX=9606 GN=KRT16 PE=1 SV=4	P08779	KRT16	51 kDa	TRUE	0	26	25	31	311	26
50	Keratin, type II cytoskeletal 5 OS=Homo sapiens OX=9606 GN=KRT5 PE=1 SV=3	P13647	KRT5	62 kDa	TRUE	1	31	31	50	204	54
14	60S ribosomal protein L13 OS=Plasmodium falciparum (isolate 3D7) OX=36329 GN=PF3D7_0814000 PE=1 SV=1	Q8IAX6	PF3D7_0814000	25 kDa		8	71	107	117	48	58
22	Keratin, type I cytoskeletal 14 OS=Homo sapiens OX=9606 GN=KRT14 PE=1 SV=4	P02533	KRT14	52 kDa	TRUE	4	31	25	39	246	36
176	Pyruvate kinase OS=Plasmodium falciparum (isolate 3D7) OX=36329 GN=PF3D7_0626800 PE=1 SV=1	C6KTA4	PF3D7_0626800	56 kDa		1	41	148	179	24	63
55	Dynamin-like protein OS=Plasmodium falciparum (isolate 3D7) OX=36329 GN=PF3D7_1037500 PE=4 SV=1	Q8IJ32	PF3D7_1037500	82 kDa		0	0	33	50	141	99
177	60S ribosomal protein L35, putative OS=Plasmodium falciparum (isolate 3D7) OX=36329 GN=PF3D7_1124900 PE=1 SV=2	Q8IIB4	PF3D7_1124900	15 kDa		1	75	91	44	32	29
9	Heat shock protein 90 OS=Plasmodium falciparum (isolate 3D7) OX=36329 GN=PF3D7_0708400 PE=1 SV=1	Q8IC05	PF3D7_0708400	86 kDa	TRUE	0	5	41	88	27	27
178	60S ribosomal protein L26, putative OS=Plasmodium falciparum (isolate 3D7) OX=36329 GN=PF3D7_0312800 PE=1 SV=1	O77364	PF3D7_0312800	15 kDa		4	93	85	107	25	33
179	60S ribosomal protein L4 OS=Plasmodium falciparum (isolate 3D7) OX=36329 GN=PF3D7_0507100 PE=1 SV=1	Q8I431	PF3D7_0507100	46 kDa		4	64	77	89	45	62
180	60S ribosomal protein L38 OS=Plasmodium falciparum (isolate 3D7) OX=36329 GN=PF3D7_1130100 PE=1 SV=1	Q8II62	PF3D7_1130100	10 kDa		0	49	35	80	58	54
137	Heat shock protein 70 OS=Plasmodium falciparum (isolate 3D7) OX=36329 GN=PF3D7_0917900 PE=3 SV=1	Q8I2X4	PF3D7_0917900	72 kDa		0	5	73	90	29	34
181	40S ribosomal protein S8 OS=Plasmodium falciparum (isolate 3D7) OX=36329 GN=PF3D7_1408600 PE=1 SV=1	Q8IM10	PF3D7_1408600	25 kDa		0	93	84	68	80	39
182	60S ribosomal protein L37ae, putative OS=Plasmodium falciparum (isolate 3D7) OX=36329 GN=PF3D7_0210100.1 PE=3 SV=1	A0A143ZYX3	PF3D7_0210100	11 kDa		2	94	84	69	21	15
183	60S ribosomal protein L24, putative OS=Plasmodium falciparum (isolate 3D7) OX=36329 GN=PF3D7_1309100 PE=1 SV=1	Q8IEM3	PF3D7_1309100	19 kDa		3	94	76	91	22	24
51	Ankyrin-1 OS=Homo sapiens OX=9606 GN=ANK1 PE=1 SV=3	P16157	ANK1	206 kDa	TRUE	0	3	31	50	29	29
184	40S ribosomal protein S26 OS=Plasmodium falciparum (isolate 3D7) OX=36329 GN=PF3D7_0217800 PE=1 SV=1	O96258	PF3D7_0217800	13 kDa		7	66	45	70	17	11
31	Band 3 anion transport protein OS=Homo sapiens OX=9606 GN=SLC4A1 PE=1 SV=3	P02730	SLC4A1	102 kDa		0	15	52	58	51	52
6	60S ribosomal protein L36 OS=Plasmodium falciparum (isolate 3D7) OX=36329 GN=PF3D7_1109900 PE=1 SV=2	Q8I713	PF3D7_1109900	13 kDa		6	41	48	38	63	41
32	Green fluorescent protein (Fragment) CONTAMINANT OS=Aequorea victoria GN=GFP PE=2 SV=1	Q17106		27 kDa		0	0	89	90	24	29
185	60S ribosomal protein L21 OS=Plasmodium falciparum (isolate 3D7) OX=36329 GN=PF3D7_1426000 PE=1 SV=1	Q8ILK3	PF3D7_1426000	19 kDa		2	84	66	59	26	25
186	60S ribosomal protein L3 OS=Plasmodium falciparum (isolate 3D7) OX=36329 GN=PF3D7_1027800 PE=1 SV=1	Q8IJC6	PF3D7_1027800	44 kDa		1	29	37	74	19	33
187	60S ribosomal protein L18-2, putative OS=Plasmodium falciparum (isolate 3D7) OX=36329 GN=PF3D7_1341300 PE=1 SV=1	C0H5G3	PF3D7_1341300	21 kDa		0	24	37	46	64	31
15	Desmoplakin OS=Homo sapiens OX=9606 GN=DSP PE=1 SV=3	P15924	DSP	332 kDa		0	4	0	18	155	8
116	Keratin, type I cytoskeletal 17 OS=Homo sapiens OX=9606 GN=KRT17 PE=1 SV=2	Q04695	KRT17	48 kDa	TRUE	0	17	18	24	134	17
188	40S ribosomal protein S15 OS=Plasmodium falciparum (isolate 3D7) OX=36329 GN=PF3D7_1358800 PE=1 SV=1	Q8IDB0	PF3D7_1358800	17 kDa		1	30	52	31	36	49
189	60S ribosomal protein L5, putative OS=Plasmodium falciparum (isolate 3D7) OX=36329 GN=PF3D7_1424100 PE=1 SV=1	Q8ILL3	PF3D7_1424100	34 kDa		0	23	39	55	54	39
190	Ribosomal protein L37 OS=Plasmodium falciparum (isolate 3D7) OX=36329 GN=PF3D7_0706400 PE=1 SV=1	C0H4L5	PF3D7_0706400	11 kDa		7	10	22	18	6	3
191	40S ribosomal protein S29, putative OS=Plasmodium falciparum (isolate 3D7) OX=36329 GN=PF3D7_0705700 PE=1 SV=1	C0H4K8	PF3D7_0705700	6 kDa		0	66	48	49	10	14
33	Albumin OS=Homo sapiens OX=9606 GN=ALB PE=1 SV=2	P02768	ALB	69 kDa	TRUE	0	0	48	0	17	19
192	Spectrin alpha chain, erythrocytic 1 OS=Homo sapiens OX=9606 GN=SPTA1 PE=1 SV=5	P02549	SPTA1	280 kDa		0	4	25	32	23	24
41	60S ribosomal protein L23 OS=Plasmodium falciparum (isolate 3D7) OX=36329 GN=PF3D7_1323400 PE=1 SV=1	Q8IE82	PF3D7_1323400	22 kDa		2	39	22	34	29	53
193	40S ribosomal protein S24 OS=Plasmodium falciparum (isolate 3D7) OX=36329 GN=PF3D7_0519400 PE=1 SV=1	Q8I3R6	PF3D7_0519400	15 kDa		1	16	28	24	35	49
194	FoP domain-containing protein, putative OS=Plasmodium falciparum (isolate 3D7) OX=36329 GN=PF3D7_0519700 PE=4 SV=1	C0H4F1	PF3D7_0519700	23 kDa		4	21	55	30	21	26
27	Spectrin beta chain, erythrocytic OS=Homo sapiens OX=9606 GN=SPTB PE=1 SV=5	P11277	SPTB	246 kDa	TRUE	0	6	22	27	27	26
195	60S ribosomal protein L2 OS=Plasmodium falciparum (isolate 3D7) OX=36329 GN=PF3D7_0516900 PE=1 SV=1	Q8I3T9	PF3D7_0516900	28 kDa		0	33	58	42	16	19
144	Uncharacterized protein OS=Plasmodium falciparum (isolate 3D7) OX=36329 GN=PF3D7_0210900 PE=4 SV=1	O96191	PF3D7_0210900	33 kDa	TRUE	0	38	26	22	26	15
196	Heat shock protein 70 OS=Plasmodium falciparum (isolate 3D7) OX=36329 GN=PF3D7_0831700 PE=1 SV=1	K7NTP5	PF3D7_0831700	75 kDa	TRUE	0	8	37	42	33	0
197	Neutrophil defensin 1 OS=Homo sapiens OX=9606 GN=DEFA1 PE=1 SV=1	P59665	DEFA1	10 kDa	TRUE	3	57	72	5	8	8
198	GTP-binding nuclear protein OS=Plasmodium falciparum (isolate 3D7) OX=36329 GN=PF3D7_1117700 PE=3 SV=1	Q7KQK6	PF3D7_1117700	25 kDa	TRUE	0	1	42	43	23	18
163	40S ribosomal protein S23, putative OS=Plasmodium falciparum (isolate 3D7) OX=36329 GN=PF3D7_0306900 PE=1 SV=1	O97248	PF3D7_0306900	16 kDa		0	25	27	14	26	15
48	Glyceraldehyde-3-phosphate dehydrogenase OS=Plasmodium falciparum (isolate 3D7) OX=36329 GN=PF3D7_1462800 PE=3 SV=1	Q8IKK7	PF3D7_1462800	37 kDa		0	4	26	56	27	29
199	Actin I OS=Plasmodium falciparum (isolate 3D7) OX=36329 GN=PF3D7_1246200 PE=3 SV=1	A0A144A1R5	PF3D7_1246200	42 kDa	TRUE	0	0	26	38	21	28
17	Histone H4 OS=Plasmodium falciparum (isolate 3D7) OX=36329 GN=PF3D7_1105000 PE=3 SV=1	Q8IIV2	PF3D7_1105000	11 kDa	TRUE	0	9	20	26	22	19
26	Actin, cytoplasmic 2 OS=Homo sapiens OX=9606 GN=ACTG1 PE=1 SV=1	P63261	ACTG1	42 kDa	TRUE	2	9	22	39	24	26
200	Keratin, type I cytoskeletal 13 OS=Homo sapiens OX=9606 GN=KRT13 PE=1 SV=4	P13646	KRT13	50 kDa	TRUE	0	22	0	30	42	8
58	Phosphoglycerate kinase OS=Plasmodium falciparum (isolate 3D7) OX=36329 GN=PGK PE=1 SV=1	P27362	PGK	45 kDa	TRUE	0	2	14	21	21	12
201	Keratin, type II cytoskeletal 4 OS=Homo sapiens OX=9606 GN=KRT4 PE=1 SV=5	P19013	KRT4	56 kDa	TRUE	0	0	0	0	53	0
42	Histone H2B OS=Plasmodium falciparum (isolate 3D7) OX=36329 GN=PF3D7_1105100 PE=3 SV=1	Q8IIV1	PF3D7_1105100	13 kDa		0	9	18	22	33	37
118	Eukaryotic initiation factor 4A OS=Plasmodium falciparum (isolate 3D7) OX=36329 GN=PF3D7_1468700 PE=3 SV=1	Q8IKF0	PF3D7_1468700	45 kDa	TRUE	0	0	19	33	9	17
53	40S ribosomal protein S4 OS=Plasmodium falciparum (isolate 3D7) OX=36329 GN=PF3D7_1105400 PE=1 SV=2	Q8IIU8	PF3D7_1105400	30 kDa		0	6	37	28	13	23
202	Hemopexin OS=Homo sapiens OX=9606 GN=HPX PE=1 SV=2	P02790	HPX	52 kDa		0	14	18	19	20	25
203	40S ribosomal protein S16, putative OS=Plasmodium falciparum (isolate 3D7) OX=36329 GN=PF3D7_0813900 PE=1 SV=1	Q8IAX5	PF3D7_0813900	16 kDa		1	28	20	28	9	30
125	Carbonic anhydrase 1 OS=Homo sapiens OX=9606 GN=CA1 PE=1 SV=2	P00915	CA1	29 kDa		0	0	25	43	31	27
204	60S ribosomal protein L29 OS=Plasmodium falciparum (isolate 3D7) OX=36329 GN=PF3D7_1460300 PE=1 SV=1	C6S3J6	PF3D7_1460300	8 kDa		0	56	12	21	8	12
205	Keratin, type II cytoskeletal 1b OS=Homo sapiens OX=9606 GN=KRT77 PE=1 SV=3	Q7Z794	KRT77	62 kDa	TRUE	0	29	25	16	30	0
68	DNA/RNA-binding protein Alba 1 OS=Plasmodium falciparum (isolate 3D7) OX=36329 GN=PF3D7_0814200 PE=4 SV=1	Q8IAX8	PF3D7_0814200	27 kDa		2	15	15	17	19	20
119	40S ribosomal protein S3 OS=Plasmodium falciparum (isolate 3D7) OX=36329 GN=PF3D7_1465900 PE=1 SV=1	Q8IKH8	PF3D7_1465900	25 kDa		0	2	34	27	11	7
206	Ribosomal protein L15 OS=Plasmodium falciparum (isolate 3D7) OX=36329 GN=PF3D7_0415900 PE=1 SV=1	C0H4A6	PF3D7_0415900	24 kDa		0	10	14	41	23	16
207	Endoplasmin, putative OS=Plasmodium falciparum (isolate 3D7) OX=36329 GN=PF3D7_1222300 PE=1 SV=1	Q8I0V4	PF3D7_1222300	95 kDa	TRUE	0	0	33	33	17	11
208	60S ribosomal protein L7a OS=Plasmodium falciparum (isolate 3D7) OX=36329 GN=PF3D7_1424400 PE=1 SV=2	Q8ILL2	PF3D7_1424400	33 kDa		0	15	18	13	14	18
25	Junction plakoglobin OS=Homo sapiens OX=9606 GN=JUP PE=1 SV=3	P14923	JUP	82 kDa		0	1	1	4	70	5
60	Protein 4.1 OS=Homo sapiens OX=9606 GN=EPB41 PE=1 SV=4	P11171	EPB41	97 kDa	TRUE	0	0	17	23	10	25
62	S-adenosylmethionine synthase OS=Plasmodium falciparum (isolate 3D7) OX=36329 GN=PF3D7_0922200 PE=3 SV=1	Q7K6A4	PF3D7_0922200	45 kDa		0	1	12	24	11	11
209	Peroxiredoxin-2 OS=Homo sapiens OX=9606 GN=PRDX2 PE=1 SV=5	P32119	PRDX2	22 kDa	TRUE	0	3	28	26	19	17
210	Heat shock cognate 71 kDa protein OS=Homo sapiens OX=9606 GN=HSPA8 PE=1 SV=1	P11142	HSPA8	71 kDa	TRUE	0	6	26	13	13	11
120	Ornithine aminotransferase OS=Plasmodium falciparum (isolate 3D7) OX=36329 GN=OAT PE=1 SV=1	Q6LFH8	OAT	46 kDa		0	4	5	10	10	9
211	60S ribosomal protein L27 OS=Plasmodium falciparum (isolate 3D7) OX=36329 GN=PF3D7_1460700 PE=1 SV=2	Q8IKM5	PF3D7_1460700	17 kDa		0	5	16	23	9	23
212	Phosphoethanolamine N-methyltransferase OS=Plasmodium falciparum (isolate 3D7) OX=36329 GN=PF3D7_1343000 PE=4 SV=1	Q8IDQ9	PF3D7_1343000	31 kDa		0	2	12	20	16	8
213	Elongation factor 2 OS=Plasmodium falciparum (isolate 3D7) OX=36329 GN=PF3D7_1451100 PE=3 SV=1	Q8IKW5	PF3D7_1451100	94 kDa	TRUE	0	2	19	14	11	12
214	60S ribosomal protein L34 OS=Plasmodium falciparum (isolate 3D7) OX=36329 GN=PF3D7_0710600 PE=1 SV=1	Q8IBY4	PF3D7_0710600	17 kDa		2	21	22	18	5	8
11	Endoplasmic reticulum chaperone BiP OS=Homo sapiens OX=9606 GN=HSPA5 PE=1 SV=2	P11021	HSPA5	72 kDa	TRUE	0	2	0	0	14	0
21	Elongation factor 1-alpha 1 OS=Homo sapiens OX=9606 GN=EEF1A1 PE=1 SV=1	P68104 (+1)	EEF1A1	50 kDa	TRUE	0	0	19	0	8	0
133	Ubiquitin OS=Plasmodium falciparum (isolate 3D7) OX=36329 GN=PF3D7_1365900 PE=1 SV=1	Q8ID50	PF3D7_1365900	15 kDa	TRUE	0	6	8	16	8	9
215	Histone H3 OS=Plasmodium falciparum (isolate 3D7) OX=36329 GN=PF3D7_0610400 PE=3 SV=1	C6KSV0	PF3D7_0610400	15 kDa	TRUE	0	22	14	10	8	9
216	Keratin, type II cytoskeletal 80 OS=Homo sapiens OX=9606 GN=KRT80 PE=1 SV=2	Q6KB66	KRT80	51 kDa	TRUE	0	7	0	0	40	20
217	60S ribosomal protein L19 OS=Plasmodium falciparum (isolate 3D7) OX=36329 GN=PF3D7_0614500 PE=1 SV=1	C6KSY6	PF3D7_0614500	22 kDa		0	8	26	15	4	5
218	Solute carrier family 2, facilitated glucose transporter member 1 OS=Homo sapiens OX=9606 GN=SLC2A1 PE=1 SV=2	P11166	SLC2A1	54 kDa		0	1	7	24	5	9
219	60S ribosomal protein L44 OS=Plasmodium falciparum (isolate 3D7) OX=36329 GN=RPL44 PE=1 SV=3	O97231	RPL44	12 kDa		0	31	12	6	7	6
220	40S ribosomal protein S11, putative OS=Plasmodium falciparum (isolate 3D7) OX=36329 GN=PF3D7_0317600 PE=1 SV=2	O77381	PF3D7_0317600	19 kDa		0	2	23	18	8	5
98	Heat shock protein 110 OS=Plasmodium falciparum (isolate 3D7) OX=36329 GN=PF3D7_0708800 PE=4 SV=1	Q8IC01	PF3D7_0708800	100 kDa		0	0	12	19	26	22
64	60S ribosomal protein L31 OS=Plasmodium falciparum (isolate 3D7) OX=36329 GN=PF3D7_0503800 PE=1 SV=1	Q8I463	PF3D7_0503800	14 kDa		0	13	8	23	9	18
54	60S ribosomal protein L17, putative OS=Plasmodium falciparum (isolate 3D7) OX=36329 GN=PF3D7_1351400 PE=1 SV=1	Q8IDI5	PF3D7_1351400	23 kDa		0	12	16	19	6	5
56	40S ribosomal protein S30 OS=Plasmodium falciparum (isolate 3D7) OX=36329 GN=PF3D7_0219200 PE=3 SV=1	A0A144A0U2	PF3D7_0219200	6 kDa		0	5	0	0	8	0
59	14-3-3 protein OS=Plasmodium falciparum (isolate 3D7) OX=36329 GN=PF3D7_0818200 PE=3 SV=1	C0H4V6	PF3D7_0818200	30 kDa	TRUE	1	3	15	20	12	8
221	Hemoglobin subunit gamma-1 OS=Homo sapiens OX=9606 GN=HBG1 PE=1 SV=2	P69891	HBG1	16 kDa	TRUE	0	0	10	23	19	0
24	Desmoglein-1 OS=Homo sapiens OX=9606 GN=DSG1 PE=1 SV=2	Q02413	DSG1	114 kDa		0	0	1	2	59	4
222	Keratin, type I cytoskeletal 27 OS=Homo sapiens OX=9606 GN=KRT27 PE=1 SV=2	Q7Z3Y8	KRT27	50 kDa	TRUE	0	0	21	8	20	0
223	High molecular weight rhoptry protein 2 OS=Plasmodium falciparum (isolate 3D7) OX=36329 GN=PF3D7_0929400 PE=4 SV=1	C0H571	PF3D7_0929400	163 kDa		0	0	4	11	11	10
103	Protein CINCH OS=Plasmodium falciparum (isolate 3D7) OX=36329 GN=PF3D7_0407800 PE=4 SV=1	Q9U0K8	PF3D7_0407800	230 kDa		0	0	1	2	37	23
121	60S ribosomal protein L28 OS=Plasmodium falciparum (isolate 3D7) OX=36329 GN=PF3D7_1142500 PE=1 SV=1	Q8IHU0	PF3D7_1142500	14 kDa		0	9	11	14	8	17
224	Keratin, type II cytoskeletal 73 OS=Homo sapiens OX=9606 GN=KRT73 PE=1 SV=1	Q86Y46	KRT73	59 kDa	TRUE	0	10	9	10	29	4
225	Keratin, type II cytoskeletal 71 OS=Homo sapiens OX=9606 GN=KRT71 PE=1 SV=3	Q3SY84	KRT71	57 kDa	TRUE	0	8	8	10	31	0
226	Lysozyme C OS=Homo sapiens OX=9606 GN=LYZ PE=1 SV=1	P61626	LYZ	17 kDa		1	5	15	22	14	6
227	Heat shock 70 kDa protein 1B OS=Homo sapiens OX=9606 GN=HSPA1B PE=1 SV=1	P0DMV9	HSPA1B	70 kDa	TRUE	0	0	25	7	8	7
228	DNA/RNA-binding protein Alba 3 OS=Plasmodium falciparum (isolate 3D7) OX=36329 GN=PF3D7_1006200 PE=4 SV=1	Q8IJX8	PF3D7_1006200	12 kDa		3	10	12	14	12	8
168	Phosphopyruvate hydratase OS=Plasmodium falciparum (isolate 3D7) OX=36329 GN=PF3D7_1015900 PE=3 SV=1	A0A143ZZ61	PF3D7_1015900	49 kDa	TRUE	0	4	7	23	17	11
229	Mini-chromosome maintenance complex-binding protein, putative OS=Plasmodium falciparum (isolate 3D7) OX=36329 GN=PF3D7_1412100 PE=4 SV=1	Q8ILX3	PF3D7_1412100	113 kDa		0	0	18	21	7	8
230	IgG CONTAMINANT [Homo sapiens]	AAA02914.1		52 kDa	TRUE	0	9	13	12	11	12
231	Glyceraldehyde-3-phosphate dehydrogenase OS=Homo sapiens OX=9606 GN=GAPDH PE=1 SV=3	P04406	GAPDH	36 kDa		0	2	4	11	23	14
46	Receptor for activated c kinase OS=Plasmodium falciparum (isolate 3D7) OX=36329 GN=PF3D7_0826700 PE=4 SV=1	Q8IBA0	PF3D7_0826700	36 kDa		0	0	9	13	9	5
97	ATP-dependent RNA helicase UAP56 OS=Plasmodium falciparum (isolate 3D7) OX=36329 GN=PF3D7_0209800 PE=4 SV=1	Q9TY94	PF3D7_0209800	52 kDa		0	0	7	11	0	3
10	Hornerin OS=Homo sapiens OX=9606 GN=HRNR PE=1 SV=2	Q86YZ3	HRNR	282 kDa		3	9	1	8	11	6
139	40S ribosomal protein S3a OS=Plasmodium falciparum (isolate 3D7) OX=36329 GN=MAL3P7.35 PE=1 SV=1	O97313	MAL3P7	30 kDa		0	1	4	3	9	10
232	Histone H4 OS=Homo sapiens OX=9606 GN=H4C1 PE=1 SV=2	P62805	H4C1	11 kDa	TRUE	0	5	11	9	7	11
134	60S ribosomal protein L11a, putative OS=Plasmodium falciparum (isolate 3D7) OX=36329 GN=PF3D7_0719600 PE=1 SV=1	Q8IBQ6	PF3D7_0719600	20 kDa		0	1	10	22	7	5
135	Protein 4.2 OS=Homo sapiens OX=9606 GN=EPB42 PE=1 SV=3	P16452	EPB42	77 kDa	TRUE	0	0	4	13	3	6
233	Keratin, type II cytoskeletal 78 OS=Homo sapiens OX=9606 GN=KRT78 PE=1 SV=2	Q8N1N4	KRT78	57 kDa	TRUE	0	7	3	6	22	6
234	Ras-related protein Rab-2 OS=Plasmodium falciparum (isolate 3D7) OX=36329 GN=PF3D7_1231100 PE=4 SV=1	Q8I5A9	PF3D7_1231100	24 kDa		0	0	1	7	5	3
235	40S ribosomal protein S9, putative OS=Plasmodium falciparum (isolate 3D7) OX=36329 GN=PF3D7_0520000 PE=1 SV=1	Q8I3R0	PF3D7_0520000	22 kDa		0	1	4	10	11	15
236	40S ribosomal protein S19 OS=Plasmodium falciparum (isolate 3D7) OX=36329 GN=PF3D7_1317800 PE=1 SV=1	C0H5C2	PF3D7_1317800	17 kDa		0	5	10	12	6	17
237	40S ribosomal protein S5 OS=Plasmodium falciparum (isolate 3D7) OX=36329 GN=PF3D7_1447000 PE=1 SV=1	Q8IL02	PF3D7_1447000	30 kDa		0	1	3	7	4	9
126	Polyadenylate-binding protein OS=Plasmodium falciparum (isolate 3D7) OX=36329 GN=PF3D7_1224300 PE=3 SV=1	Q8I5H4	PF3D7_1224300	97 kDa		0	6	3	7	1	2
238	40S ribosomal protein S25 OS=Plasmodium falciparum (isolate 3D7) OX=36329 GN=PF3D7_1421200 PE=1 SV=2	Q8ILN8	PF3D7_1421200	12 kDa		1	11	8	8	6	1
239	40S ribosomal protein S11 OS=Plasmodium falciparum (isolate 3D7) OX=36329 GN=PF3D7_0516200 PE=3 SV=1	A0A5K1K925	PF3D7_0516200	16 kDa		0	6	10	12	5	6
240	Tubulin beta chain OS=Plasmodium falciparum (isolate 3D7) OX=36329 GN=PF3D7_1008700 PE=3 SV=1	A0A143ZWL7	PF3D7_1008700	50 kDa	TRUE	0	2	6	7	6	4
241	40S ribosomal protein S19 OS=Plasmodium falciparum (isolate 3D7) OX=36329 GN=PF3D7_0422400 PE=1 SV=1	Q8IFP2	PF3D7_0422400	20 kDa		0	8	10	12	3	6
45	60S ribosomal protein L13, putative OS=Plasmodium falciparum (isolate 3D7) OX=36329 GN=PF3D7_1004000 PE=1 SV=1	Q8IJZ7	PF3D7_1004000	24 kDa		0	0	6	10	4	8
242	Spindle assembly abnormal protein 6, putative OS=Plasmodium falciparum (isolate 3D7) OX=36329 GN=PF3D7_0607600 PE=4 SV=1	C6KSS4	PF3D7_0607600	101 kDa		0	1	7	23	0	5
34	60S ribosomal protein L18a OS=Plasmodium falciparum (isolate 3D7) OX=36329 GN=PF3D7_1341200 PE=1 SV=1	Q8IDS6	PF3D7_1341200	22 kDa		0	1	8	10	6	8
243	40S ribosomal protein S17, putative OS=Plasmodium falciparum (isolate 3D7) OX=36329 GN=PF3D7_1242700 PE=1 SV=1	Q8I502	PF3D7_1242700	16 kDa	TRUE	0	0	4	9	6	15
77	Stomatin OS=Homo sapiens OX=9606 GN=STOM PE=1 SV=3	P27105	STOM	32 kDa		0	2	2	10	5	5
244	Inner membrane complex protein 1f, putative OS=Plasmodium falciparum (isolate 3D7) OX=36329 GN=PF3D7_1351700 PE=4 SV=1	A0A5K1K988	PF3D7_1351700	152 kDa		0	0	0	0	22	16
245	60S ribosomal protein L23, putative OS=Plasmodium falciparum (isolate 3D7) OX=36329 GN=PF3D7_1331800 PE=1 SV=1	Q8IE09	PF3D7_1331800	15 kDa		0	2	14	8	5	10
246	40S ribosomal protein S18, putative OS=Plasmodium falciparum (isolate 3D7) OX=36329 GN=PF3D7_1126200 PE=1 SV=1	Q8IIA2	PF3D7_1126200	18 kDa		0	14	6	8	9	7
247	rRNA 2'-O-methyltransferase fibrillarin, putative OS=Plasmodium falciparum (isolate 3D7) OX=36329 GN=PF3D7_1407100 PE=3 SV=1	Q8IM23	PF3D7_1407100	34 kDa		0	3	4	8	10	5
248	40S ribosomal protein S28e, putative OS=Plasmodium falciparum (isolate 3D7) OX=36329 GN=PF3D7_1461300 PE=1 SV=1	Q8IKL9	PF3D7_1461300	7 kDa		0	5	15	12	3	9
249	Keratin, type I cuticular Ha1 OS=Homo sapiens OX=9606 GN=KRT31 PE=1 SV=3	Q15323	KRT31	47 kDa	TRUE	0	10	0	0	0	5
122	60S acidic ribosomal protein P0 OS=Plasmodium falciparum (isolate 3D7) OX=36329 GN=PF3D7_1130200 PE=3 SV=1	Q8II61	PF3D7_1130200	35 kDa		0	3	5	9	4	4
250	60S ribosomal protein L6, putative OS=Plasmodium falciparum (isolate 3D7) OX=36329 GN=PF3D7_1338200 PE=3 SV=1	A0A5K1K8V8	PF3D7_1338200	26 kDa		0	0	8	11	8	8
251	Glutamyl-tRNA synthetase OS=Plasmodium falciparum (isolate 3D7) OX=36329 GN=PF3D7_1349200 PE=3 SV=1	Q8IDK7	PF3D7_1349200	101 kDa		0	0	4	7	0	0
113	Extracellular matrix protein 1 OS=Homo sapiens OX=9606 GN=ECM1 PE=1 SV=2	Q16610	ECM1	61 kDa		0	13	15	3	6	6
252	Ras-related protein Rab-1B OS=Plasmodium falciparum (isolate 3D7) OX=36329 GN=PF3D7_0512600 PE=4 SV=1	A0A5K1K8H7	PF3D7_0512600	23 kDa	TRUE	0	0	0	5	4	5
141	Keratinocyte proline-rich protein OS=Homo sapiens OX=9606 GN=KPRP PE=1 SV=1	Q5T749	KPRP	64 kDa		0	0	1	3	8	5
253	Histone H2A OS=Plasmodium falciparum (isolate 3D7) OX=36329 GN=PF3D7_0320900 PE=3 SV=1	O97320	PF3D7_0320900	16 kDa	TRUE	0	3	7	8	3	5
254	Insulin-like growth factor II OS=Homo sapiens OX=9606 GN=IGF2 PE=1 SV=1	P01344	IGF2	20 kDa		0	11	13	2	7	4
255	ATP-dependent RNA helicase DDX6 OS=Plasmodium falciparum (isolate 3D7) OX=36329 GN=PF3D7_0320800 PE=3 SV=1	O97285	PF3D7_0320800	49 kDa		0	0	4	3	4	2
256	ADP-ribosylation factor OS=Plasmodium falciparum (isolate 3D7) OX=36329 GN=PF3D7_1020900 PE=3 SV=1	A0A143ZY58	PF3D7_1020900	21 kDa		0	0	1	5	1	6
19	Ras-related protein Rab-1A OS=Plasmodium falciparum (isolate 3D7) OX=36329 GN=PF3D7_0513800 PE=4 SV=1	Q8I3W9	PF3D7_0513800	24 kDa	TRUE	0	0	0	5	0	0
28	ADP/ATP transporter on adenylate translocase OS=Plasmodium falciparum (isolate 3D7) OX=36329 GN=PF3D7_1037300 PE=3 SV=1	Q8IJ34	PF3D7_1037300	34 kDa		0	0	5	9	2	2
257	60S ribosomal protein L10, putative OS=Plasmodium falciparum (isolate 3D7) OX=36329 GN=PF3D7_1414300 PE=1 SV=1	Q8ILV2	PF3D7_1414300	25 kDa		0	3	7	6	4	2
258	DNA/RNA-binding protein Alba 4 OS=Plasmodium falciparum (isolate 3D7) OX=36329 GN=PF3D7_1347500 PE=4 SV=1	A0A5K1K8Y8	PF3D7_1347500	42 kDa		0	0	3	8	5	5
13	Protein SEY1 homolog OS=Plasmodium falciparum (isolate 3D7) OX=36329 GN=PF3D7_1416100 PE=3 SV=1	A0A144A1B3	PF3D7_1416100	111 kDa		0	0	0	2	0	0
259	60S ribosomal protein L7, putative OS=Plasmodium falciparum (isolate 3D7) OX=36329 GN=PF3D7_0307200 PE=1 SV=2	O97250	PF3D7_0307200	31 kDa		2	4	3	2	9	5
260	L-lactate dehydrogenase OS=Plasmodium falciparum (isolate 3D7) OX=36329 GN=PF3D7_1324900 PE=1 SV=1	Q76NM3	PF3D7_1324900	34 kDa		0	4	6	9	11	5
261	Uncharacterized protein OS=Plasmodium falciparum (isolate 3D7) OX=36329 GN=PF3D7_0606600 PE=4 SV=1	C6KSR4	PF3D7_0606600	280 kDa		0	0	0	0	7	18
262	40S ribosomal protein S7 OS=Plasmodium falciparum (isolate 3D7) OX=36329 GN=PF3D7_1302800 PE=1 SV=1	Q8IET7	PF3D7_1302800	22 kDa		0	0	1	9	6	3
106	Erythrocyte membrane-associated antigen OS=Plasmodium falciparum (isolate 3D7) OX=36329 GN=PF3D7_0703500 PE=3 SV=2	Q8IC35	PF3D7_0703500	265 kDa		0	0	4	1	0	0
263	60S ribosomal protein L12, putative OS=Plasmodium falciparum (isolate 3D7) OX=36329 GN=PF3D7_0517000 PE=3 SV=2	Q8I3T8	PF3D7_0517000	18 kDa		0	1	6	11	3	3
23	Eukaryotic translation initiation factor 3 subunit C OS=Plasmodium falciparum (isolate 3D7) OX=36329 GN=PF3D7_1206200 PE=3 SV=1	Q8I5Y3	PF3D7_1206200	116 kDa		0	0	2	4	0	0
167	DNA replication licensing factor MCM7 OS=Plasmodium falciparum (isolate 3D7) OX=36329 GN=MCM7 PE=3 SV=1	Q8IC16	MCM7	94 kDa		0	0	2	2	0	0
63	60S ribosomal protein L35ae, putative OS=Plasmodium falciparum (isolate 3D7) OX=36329 GN=PF3D7_1142600 PE=1 SV=1	Q8IHT9	PF3D7_1142600	16 kDa		0	0	1	7	4	1
264	40S ribosomal protein S15A, putative OS=Plasmodium falciparum (isolate 3D7) OX=36329 GN=PF3D7_0316800 PE=1 SV=1	O77395	PF3D7_0316800	15 kDa		0	1	5	6	3	3
265	Acyl-CoA synthetase OS=Plasmodium falciparum (isolate 3D7) OX=36329 GN=PF3D7_0525100 PE=4 SV=1	Q8I3L4	PF3D7_0525100	77 kDa		0	0	1	1	0	0
108	Uncharacterized protein OS=Plasmodium falciparum (isolate 3D7) OX=36329 GN=PF3D7_0821000 PE=4 SV=1	Q8IB44	PF3D7_0821000	61 kDa		0	0	1	3	0	1
266	Tubulin alpha chain OS=Plasmodium falciparum (isolate 3D7) OX=36329 GN=PF3D7_0903700 PE=3 SV=1	Q6ZLZ9	PF3D7_0903700	50 kDa	TRUE	0	1	3	6	4	3
267	Trailer hitch homolog, putative OS=Plasmodium falciparum (isolate 3D7) OX=36329 GN=PF3D7_1474900 PE=4 SV=1	Q8IK89	PF3D7_1474900	39 kDa		0	3	12	7	1	1
35	26S protease regulatory subunit 7, putative OS=Plasmodium falciparum (isolate 3D7) OX=36329 GN=PF3D7_1311500 PE=3 SV=2	Q8IEK3	PF3D7_1311500	47 kDa	TRUE	0	0	3	3	2	1
268	Plakophilin-1 OS=Homo sapiens OX=9606 GN=PKP1 PE=1 SV=2	Q13835	PKP1	83 kDa		0	0	0	1	28	0
269	40S ribosomal protein S5, putative OS=Plasmodium falciparum (isolate 3D7) OX=36329 GN=PF3D7_0721600 PE=1 SV=1	Q8IBN5	PF3D7_0721600	22 kDa		0	0	7	11	3	1
151	Small heat shock protein, putative OS=Plasmodium falciparum (isolate 3D7) OX=36329 GN=PF3D7_1304500 PE=3 SV=1	Q8IES0	PF3D7_1304500	25 kDa		0	0	0	2	3	2
270	Fructose-bisphosphate aldolase OS=Plasmodium falciparum (isolate 3D7) OX=36329 GN=PF3D7_1444800 PE=3 SV=1	A0A144A3T1	PF3D7_1444800	40 kDa		0	1	5	7	9	3
271	GTP-binding nuclear protein Ran OS=Homo sapiens OX=9606 GN=RAN PE=1 SV=3	P62826	RAN	24 kDa	TRUE	0	0	5	12	4	3
83	Heat shock protein 70 OS=Plasmodium falciparum (isolate 3D7) OX=36329 GN=PF3D7_1134000 PE=3 SV=1	Q8II24	PF3D7_1134000	73 kDa	TRUE	0	0	5	5	0	0
272	Fatty acid-binding protein 5 OS=Homo sapiens OX=9606 GN=FABP5 PE=1 SV=3	Q01469	FABP5	15 kDa		0	0	0	1	29	0
18	Corneodesmosin OS=Homo sapiens OX=9606 GN=CDSN PE=1 SV=3	Q15517	CDSN	52 kDa		0	0	1	1	13	0
273	60S ribosomal protein L30e, putative OS=Plasmodium falciparum (isolate 3D7) OX=36329 GN=PF3D7_1019400 PE=1 SV=1	Q8IJK8	PF3D7_1019400	12 kDa		0	1	8	7	5	6
274	Desmocollin-1 OS=Homo sapiens OX=9606 GN=DSC1 PE=1 SV=2	Q08554	DSC1	100 kDa		0	0	0	2	15	3
275	26S protease regulatory subunit 10B, putative OS=Plasmodium falciparum (isolate 3D7) OX=36329 GN=PF3D7_1306400 PE=3 SV=1	Q8IEQ1	PF3D7_1306400	45 kDa	TRUE	0	0	2	6	1	1
276	Heat shock protein 101 OS=Plasmodium falciparum (isolate 3D7) OX=36329 GN=PF3D7_1116800 PE=1 SV=1	Q8IIJ8	PF3D7_1116800	103 kDa		0	0	0	0	0	0
36	60S ribosomal protein L22, putative OS=Plasmodium falciparum (isolate 3D7) OX=36329 GN=PF3D7_0821700 PE=1 SV=1	Q8IB51	PF3D7_0821700	16 kDa	TRUE	0	0	3	3	4	6
277	Insulin-like growth factor-binding protein 3 OS=Homo sapiens OX=9606 GN=IGFBP3 PE=1 SV=2	P17936	IGFBP3	32 kDa		0	2	4	2	3	3
72	T-complex protein 1 subunit epsilon OS=Plasmodium falciparum (isolate 3D7) OX=36329 GN=PF3D7_0320300 PE=3 SV=1	O97282	PF3D7_0320300	59 kDa	TRUE	0	0	3	7	0	2
140	26S protease regulatory subunit 8, putative OS=Plasmodium falciparum (isolate 3D7) OX=36329 GN=PF3D7_1248900 PE=3 SV=1	Q8I4U5	PF3D7_1248900	50 kDa	TRUE	0	0	3	3	0	0
123	60S ribosomal protein L14, putative OS=Plasmodium falciparum (isolate 3D7) OX=36329 GN=PF3D7_1431700 PE=1 SV=1	Q8ILE8	PF3D7_1431700	19 kDa		0	2	3	5	3	4
37	PRE-binding protein OS=Plasmodium falciparum (isolate 3D7) OX=36329 GN=PF3D7_1011800 PE=4 SV=1	Q8IJS7	PF3D7_1011800	132 kDa		0	4	1	4	2	0
278	Ras-related protein RAB7 OS=Plasmodium falciparum (isolate 3D7) OX=36329 GN=PF3D7_0903200 PE=4 SV=1	C0H516	PF3D7_0903200	24 kDa		0	0	0	2	0	2
29	Karyopherin beta OS=Plasmodium falciparum (isolate 3D7) OX=36329 GN=PF3D7_0524000 PE=4 SV=1	Q8I3M5	PF3D7_0524000	127 kDa		0	0	3	9	3	3
279	Catalase OS=Homo sapiens OX=9606 GN=CAT PE=1 SV=3	P04040	CAT	60 kDa		0	0	3	7	6	5
280	Elongation factor 1-gamma, putative OS=Plasmodium falciparum (isolate 3D7) OX=36329 GN=PF3D7_1338300 PE=4 SV=1	A0A5K1K967	PF3D7_1338300	48 kDa		0	0	3	1	1	2
281	gamma heavy chain, partial CONTAMINANT [Oryctolagus cuniculus cuniculus]	gi|0000000C|emb|AKM12456.1|Immunoglobulin		35 kDa	TRUE	0	0	0	0	0	1
282	Dematin OS=Homo sapiens OX=9606 GN=DMTN PE=1 SV=3	Q08495	DMTN	46 kDa		0	2	7	8	3	5
283	Small GTP-binding protein sar1 OS=Plasmodium falciparum (isolate 3D7) OX=36329 GN=PF3D7_0416800 PE=3 SV=1	Q8I1S0	PF3D7_0416800	22 kDa		0	0	2	7	2	2
284	Peroxiredoxin-1 OS=Homo sapiens OX=9606 GN=PRDX1 PE=1 SV=1	Q06830	PRDX1	22 kDa	TRUE	0	0	11	4	4	2
38	Obg-like ATPase 1 OS=Plasmodium falciparum (isolate 3D7) OX=36329 GN=PF3D7_0722400 PE=3 SV=1	Q8IBM9	PF3D7_0722400	45 kDa		0	0	0	1	0	0
155	Eukaryotic translation initiation factor 3 subunit B OS=Plasmodium falciparum (isolate 3D7) OX=36329 GN=PF3D7_0517700 PE=3 SV=1	Q8I3T1	PF3D7_0517700	84 kDa		0	0	1	1	0	0
285	Actin II OS=Plasmodium falciparum (isolate 3D7) OX=36329 GN=PF3D7_1412500 PE=3 SV=1	A0A144A3N9	PF3D7_1412500	43 kDa	TRUE	0	0	2	3	0	1
286	Serotransferrin OS=Homo sapiens OX=9606 GN=TF PE=1 SV=3	P02787	TF	77 kDa		0	1	1	9	1	2
287	Transcription elongation factor 1 homolog OS=Plasmodium falciparum (isolate 3D7) OX=36329 GN=PF3D7_0914600 PE=3 SV=1	Q8I306	PF3D7_0914600	13 kDa		0	4	0	1	8	6
169	CCT-alpha OS=Plasmodium falciparum (isolate 3D7) OX=36329 GN=PF3D7_1132200 PE=3 SV=1	Q8II43	PF3D7_1132200	60 kDa		0	0	4	6	0	0
288	Cell division cycle protein 48 homologue, putative OS=Plasmodium falciparum (isolate 3D7) OX=36329 GN=PF3D7_0619400 PE=4 SV=1	C6KT34	PF3D7_0619400	92 kDa	TRUE	0	0	0	5	3	0
145	Eukaryotic translation initiation factor 3 subunit I OS=Plasmodium falciparum (isolate 3D7) OX=36329 GN=PF3D7_0716800 PE=3 SV=1	Q8IBT2	PF3D7_0716800	37 kDa		0	0	0	0	0	0
289	Histone H3.1 OS=Homo sapiens OX=9606 GN=H3C1 PE=1 SV=2	P68431 (+1)	H3C1	15 kDa	TRUE	0	1	0	1	3	2
290	Heat shock protein DNAJ homologue Pfj4 OS=Plasmodium falciparum (isolate 3D7) OX=36329 GN=PF3D7_1211400 PE=4 SV=1	Q7KQK3	PF3D7_1211400	28 kDa		0	0	3	3	5	1
291	DNA replication licensing factor MCM2 OS=Plasmodium falciparum (isolate 3D7) OX=36329 GN=PF3D7_1417800 PE=3 SV=1	Q8ILR7	PF3D7_1417800	112 kDa		0	0	1	2	0	0
61	Cation transporting P-ATPase OS=Plasmodium falciparum (isolate 3D7) OX=36329 GN=PF3D7_0504000 PE=4 SV=1	Q8I461	PF3D7_0504000	283 kDa		0	0	0	0	0	0
292	Calcium-transporting ATPase OS=Plasmodium falciparum (isolate 3D7) OX=36329 GN=PF3D7_0106300 PE=4 SV=1	Q76NN8	PF3D7_0106300	139 kDa		0	0	0	4	0	0
293	Phosphoribosylpyrophosphate synthetase OS=Plasmodium falciparum (isolate 3D7) OX=36329 GN=PF3D7_1325100 PE=3 SV=1	Q8IE67	PF3D7_1325100	49 kDa		0	0	5	4	1	1
294	26S protease regulatory subunit 4, putative OS=Plasmodium falciparum (isolate 3D7) OX=36329 GN=PF3D7_1008400 PE=3 SV=2	Q8IJW0	PF3D7_1008400	50 kDa		0	0	2	3	2	1
295	Ras-related protein Rab-18 OS=Plasmodium falciparum (isolate 3D7) OX=36329 GN=PF3D7_0807300 PE=4 SV=1	Q7K6B0	PF3D7_0807300	23 kDa		0	0	0	4	1	3
296	Vesicle-fusing ATPase OS=Plasmodium falciparum (isolate 3D7) OX=36329 GN=PF3D7_0303000 PE=3 SV=1	O77313	PF3D7_0303000	89 kDa		0	0	1	0	1	1
143	T-complex protein 1 subunit gamma OS=Plasmodium falciparum (isolate 3D7) OX=36329 GN=PF3D7_1229500 PE=3 SV=1	Q8I5C4	PF3D7_1229500	61 kDa		0	0	4	2	0	0
297	Ras-related protein Rab-11A OS=Plasmodium falciparum (isolate 3D7) OX=36329 GN=PF3D7_1320600 PE=1 SV=1	Q76NM4	PF3D7_1320600	25 kDa	TRUE	0	0	2	4	1	0
298	T-complex protein 1 subunit zeta OS=Plasmodium falciparum (isolate 3D7) OX=36329 GN=PF3D7_0608700 PE=3 SV=1	C6KST5	PF3D7_0608700	62 kDa	TRUE	0	0	4	5	0	0
299	Keratin, type II cuticular Hb6 OS=Homo sapiens OX=9606 GN=KRT86 PE=1 SV=1	O43790	KRT86	53 kDa	TRUE	0	5	0	0	3	0
300	Ribosomal protein S27a, putative OS=Plasmodium falciparum (isolate 3D7) OX=36329 GN=PF3D7_1402500 PE=3 SV=1	Q8IM64	PF3D7_1402500	17 kDa		0	1	0	0	2	0
301	Cation transporting ATPase, putative OS=Plasmodium falciparum (isolate 3D7) OX=36329 GN=PF3D7_0727800 PE=4 SV=1	Q8IBH9	PF3D7_0727800	225 kDa		0	0	0	0	0	0
302	Thioredoxin 2 OS=Plasmodium falciparum (isolate 3D7) OX=36329 GN=trx2 PE=1 SV=1	Q8IDP4	trx2	19 kDa		0	5	1	3	2	7
303	Ribonucleoside-diphosphate reductase OS=Plasmodium falciparum (isolate 3D7) OX=36329 GN=PF3D7_1437200 PE=3 SV=1	Q8IL94	PF3D7_1437200	97 kDa		0	0	0	2	0	0
304	Nucleolar protein Nop52, putative OS=Plasmodium falciparum (isolate 3D7) OX=36329 GN=PF3D7_0931100 PE=4 SV=1	Q8I2K4	PF3D7_0931100	98 kDa		0	4	0	1	3	6
305	Thioredoxin-related protein, putative OS=Plasmodium falciparum (isolate 3D7) OX=36329 GN=PF3D7_1352500 PE=4 SV=1	Q8IDH5	PF3D7_1352500	24 kDa		0	0	3	5	6	3
94	Protein-synthesizing GTPase OS=Plasmodium falciparum (isolate 3D7) OX=36329 GN=PF3D7_1410600 PE=4 SV=1	Q8ILY9	PF3D7_1410600	51 kDa		0	0	2	2	1	0
127	T-complex protein 1 subunit delta OS=Plasmodium falciparum (isolate 3D7) OX=36329 GN=PF3D7_1357800 PE=3 SV=1	C0H5I7	PF3D7_1357800	58 kDa		0	0	3	6	0	0
306	Complement C4-A OS=Homo sapiens OX=9606 GN=C4A PE=1 SV=2	P0C0L4	C4A	193 kDa		0	0	0	8	4	4
92	26S protease regulatory subunit 6A, putative OS=Plasmodium falciparum (isolate 3D7) OX=36329 GN=PF3D7_1130400 PE=3 SV=1	Q8II60	PF3D7_1130400	50 kDa		0	0	4	4	0	0
307	Signal recognition particle receptor subunit beta OS=Plasmodium falciparum (isolate 3D7) OX=36329 GN=PF3D7_1246800 PE=3 SV=1	Q8I4W4	PF3D7_1246800	31 kDa		0	0	0	1	0	0
308	Single-strand telomeric DNA-binding protein GBP2, putative OS=Plasmodium falciparum (isolate 3D7) OX=36329 GN=PF3D7_1006800 PE=4 SV=1	Q8IJX3	PF3D7_1006800	30 kDa		0	3	0	4	2	3
124	Vesicle-associated membrane protein, putative OS=Plasmodium falciparum (isolate 3D7) OX=36329 GN=PF3D7_1439800 PE=4 SV=1	Q8IL71	PF3D7_1439800	28 kDa		0	0	1	1	0	1
65	Uncharacterized protein OS=Plasmodium falciparum (isolate 3D7) OX=36329 GN=PF3D7_1328300 PE=4 SV=1	Q8IE43	PF3D7_1328300	39 kDa		0	0	0	1	0	0
309	Autophagy-related protein 18 OS=Plasmodium falciparum (isolate 3D7) OX=36329 GN=PF3D7_1012900 PE=4 SV=1	Q8IJR6	PF3D7_1012900	44 kDa		0	0	3	4	0	0
47	Uncharacterized protein OS=Plasmodium falciparum (isolate 3D7) OX=36329 GN=PF3D7_0831400 PE=4 SV=1	C0H4Z7	PF3D7_0831400	36 kDa		0	1	2	3	0	1
310	Protein disulfide-isomerase OS=Plasmodium falciparum (isolate 3D7) OX=36329 GN=PF3D7_0827900 PE=3 SV=1	C0H4Y6	PF3D7_0827900	56 kDa		0	1	2	5	3	0
311	60S ribosomal protein L35 OS=Homo sapiens OX=9606 GN=RPL35 PE=1 SV=2	P42766	RPL35	15 kDa		0	1	2	5	5	2
312	Arginase-1 OS=Homo sapiens OX=9606 GN=ARG1 PE=1 SV=2	P05089	ARG1	35 kDa		0	1	0	2	10	1
313	NPL domain-containing protein OS=Plasmodium falciparum (isolate 3D7) OX=36329 GN=PF3D7_0813300 PE=4 SV=1	C0H4U4	PF3D7_0813300	36 kDa		0	0	2	6	5	0
314	Spermidine synthase OS=Plasmodium falciparum (isolate 3D7) OX=36329 GN=PF3D7_1129000 PE=1 SV=1	Q8II73	PF3D7_1129000	37 kDa		0	0	0	2	3	1
161	Clathrin heavy chain OS=Plasmodium falciparum (isolate 3D7) OX=36329 GN=PF3D7_1219100 PE=3 SV=1	Q8I5L6	PF3D7_1219100	233 kDa	TRUE	0	0	4	4	0	0
315	Eukaryotic peptide chain release factor subunit 1 OS=Plasmodium falciparum (isolate 3D7) OX=36329 GN=PF3D7_0212300 PE=3 SV=1	O96203	PF3D7_0212300	48 kDa		0	0	0	2	0	0
316	DNA helicase OS=Plasmodium falciparum (isolate 3D7) OX=36329 GN=PF3D7_1317100 PE=3 SV=1	Q8IEE5	PF3D7_1317100	115 kDa		0	0	0	3	0	0
317	Ras-related protein Rab-11B OS=Plasmodium falciparum (isolate 3D7) OX=36329 GN=PF3D7_1340700 PE=4 SV=2	C0H5G2	PF3D7_1340700	26 kDa	TRUE	0	0	3	3	0	1
318	Pyruvate kinase PKM OS=Homo sapiens OX=9606 GN=PKM PE=1 SV=4	P14618	PKM	58 kDa		0	0	0	2	11	0
319	Polyadenylate-binding protein 2, putative OS=Plasmodium falciparum (isolate 3D7) OX=36329 GN=PF3D7_0923900 PE=4 SV=1	Q8I2R8	PF3D7_0923900	23 kDa		0	4	1	2	2	1
320	Cathepsin G OS=Homo sapiens OX=9606 GN=CTSG PE=1 SV=2	P08311	CTSG	29 kDa		0	1	3	5	3	1
321	40S ribosomal protein S10, putative OS=Plasmodium falciparum (isolate 3D7) OX=36329 GN=PF3D7_0719700 PE=1 SV=1	Q8IBQ5	PF3D7_0719700	16 kDa		0	0	3	4	1	3
322	ATP-dependent RNA helicase DBP1, putative OS=Plasmodium falciparum (isolate 3D7) OX=36329 GN=PF3D7_0810600 PE=4 SV=1	Q8IAU1	PF3D7_0810600	109 kDa		0	0	1	5	0	1
57	Phosphoglycerate mutase OS=Plasmodium falciparum (isolate 3D7) OX=36329 GN=PF3D7_1120100 PE=1 SV=1	Q8IIG6	PF3D7_1120100	29 kDa		0	0	0	0	1	3
105	Myosin F, putative OS=Plasmodium falciparum (isolate 3D7) OX=36329 GN=PF3D7_1329100 PE=3 SV=1	Q8IE50	PF3D7_1329100	250 kDa	TRUE	0	1	4	3	0	0
323	Carbonic anhydrase 2 OS=Homo sapiens OX=9606 GN=CA2 PE=1 SV=2	P00918	CA2	29 kDa		0	0	1	9	5	1
91	Adenosine deaminase OS=Plasmodium falciparum (isolate 3D7) OX=36329 GN=ADA PE=1 SV=1	Q8IJA9	ADA	42 kDa		0	0	0	3	7	1
324	Casein kinase I OS=Plasmodium falciparum (isolate 3D7) OX=36329 GN=PF3D7_1136500.1 PE=3 SV=1	A0A144A308	PF3D7_1136500	38 kDa		0	0	0	4	0	0
325	ATP-dependent RNA helicase DDX5, putative OS=Plasmodium falciparum (isolate 3D7) OX=36329 GN=PF3D7_1445900 PE=2 SV=2	Q8IL13	PF3D7_1445900	60 kDa		0	0	0	1	0	0
80	Glutamate dehydrogenase, putative OS=Plasmodium falciparum (isolate 3D7) OX=36329 GN=PF3D7_0802000 PE=3 SV=1	Q8IAM0	PF3D7_0802000	160 kDa		0	0	0	1	0	0
326	Eukaryotic translation initiation factor 2 subunit alpha OS=Plasmodium falciparum (isolate 3D7) OX=36329 GN=PF3D7_0728000 PE=3 SV=1	Q8IBH7	PF3D7_0728000	38 kDa		0	0	0	0	0	0
327	Signal recognition particle receptor subunit alpha, putative OS=Plasmodium falciparum (isolate 3D7) OX=36329 GN=PF3D7_1366600 PE=3 SV=1	Q8ID42	PF3D7_1366600	66 kDa		0	0	0	0	0	0
328	Alpha-enolase OS=Homo sapiens OX=9606 GN=ENO1 PE=1 SV=2	P06733	ENO1	47 kDa	TRUE	0	0	0	0	17	0
329	Histone H2B OS=Plasmodium falciparum (isolate 3D7) OX=36329 GN=PF3D7_0714000 PE=3 SV=1	Q8IBV7	PF3D7_0714000	14 kDa		0	1	1	1	3	3
115	Mature parasite-infected erythrocyte surface antigen OS=Plasmodium falciparum (isolate 3D7) OX=36329 GN=PF3D7_0500800 PE=4 SV=1	Q8I492	PF3D7_0500800	168 kDa		0	0	2	1	1	1
330	Proliferation-associated protein 2g4, putative OS=Plasmodium falciparum (isolate 3D7) OX=36329 GN=PF3D7_1428300 PE=3 SV=1	Q8ILI2	PF3D7_1428300	43 kDa		0	0	7	3	1	2
112	Merozoite surface antigens OS=Plasmodium falciparum (isolate 3D7) OX=36329 GN=PF3D7_0930300 PE=4 SV=1	Q8I0U8	PF3D7_0930300	196 kDa		0	0	0	2	8	3
150	Multidrug resistance protein 1 OS=Plasmodium falciparum (isolate 3D7) OX=36329 GN=PF3D7_0523000 PE=4 SV=1	Q7K6A5	PF3D7_0523000	162 kDa		0	0	1	1	0	0
331	40S ribosomal protein SA OS=Plasmodium falciparum (isolate 3D7) OX=36329 GN=PF3D7_1026800 PE=3 SV=1	A0A143ZZG2	PF3D7_1026800	30 kDa		0	0	2	2	1	2
332	YOP1-like protein, putative OS=Plasmodium falciparum (isolate 3D7) OX=36329 GN=PF3D7_1358700 PE=3 SV=1	Q8IDB8	PF3D7_1358700	18 kDa		0	0	3	3	2	1
333	60S ribosomal protein L6, putative OS=Plasmodium falciparum (isolate 3D7) OX=36329 GN=PF3D7_1323100 PE=1 SV=1	Q8IE85	PF3D7_1323100	22 kDa		0	0	3	2	2	0
128	Choline/ethanolaminephosphotransferase, putative OS=Plasmodium falciparum (isolate 3D7) OX=36329 GN=PF3D7_0628300.1 PE=3 SV=1	C6KTB9	PF3D7_0628300	45 kDa		0	0	1	0	0	0
130	HSP40, subfamily A OS=Plasmodium falciparum (isolate 3D7) OX=36329 GN=PF3D7_1437900 PE=4 SV=1	Q8IL88	PF3D7_1437900	48 kDa		0	0	0	2	0	1
334	Ras-related protein Rab-6 OS=Plasmodium falciparum (isolate 3D7) OX=36329 GN=PF3D7_1144900 PE=4 SV=2	Q8IHR8	PF3D7_1144900	24 kDa		0	0	0	2	2	0
335	Tubulin alpha-1C chain OS=Homo sapiens OX=9606 GN=TUBA1C PE=1 SV=1	Q9BQE3	TUBA1C	50 kDa	TRUE	0	0	0	3	5	0
336	Eukaryotic translation initiation factor 5A OS=Plasmodium falciparum (isolate 3D7) OX=36329 GN=PF3D7_1204300 PE=3 SV=1	Q8I603	PF3D7_1204300	18 kDa		0	1	1	2	4	0
337	Multiprotein-bridging factor 1, putative OS=Plasmodium falciparum (isolate 3D7) OX=36329 GN=PF3D7_1128200 PE=4 SV=1	Q8II81	PF3D7_1128200	16 kDa		0	3	2	2	2	2
338	55 kDa erythrocyte membrane protein OS=Homo sapiens OX=9606 GN=MPP1 PE=1 SV=2	Q00013	MPP1	52 kDa		0	0	0	3	1	1
339	Macrophage migration inhibitory factor OS=Plasmodium falciparum (isolate 3D7) OX=36329 GN=PF3D7_1229400 PE=1 SV=1	Q8I5C5	PF3D7_1229400	13 kDa		0	0	2	6	2	3
340	Lactotransferrin OS=Homo sapiens OX=9606 GN=LTF PE=1 SV=6	P02788	LTF	78 kDa		0	0	1	1	3	7
76	Uncharacterized protein OS=Plasmodium falciparum (isolate 3D7) OX=36329 GN=PF3D7_0504800 PE=4 SV=1	C0H4C4	PF3D7_0504800	672 kDa		0	0	1	5	0	0
341	T-complex protein 1 subunit theta OS=Plasmodium falciparum (isolate 3D7) OX=36329 GN=PF3D7_0214000 PE=3 SV=3	O96220	PF3D7_0214000	61 kDa		0	0	2	2	0	0
342	Eukaryotic translation initiation factor 3 subunit A OS=Plasmodium falciparum (isolate 3D7) OX=36329 GN=PF3D7_1212700 PE=3 SV=1	Q8I5S6	PF3D7_1212700	166 kDa		0	0	1	1	0	0
343	AP-3 complex subunit delta, putative OS=Plasmodium falciparum (isolate 3D7) OX=36329 GN=PF3D7_0808100 PE=3 SV=1	C0H4T0	PF3D7_0808100	193 kDa		0	0	2	1	0	0
129	Calpain-1 catalytic subunit OS=Homo sapiens OX=9606 GN=CAPN1 PE=1 SV=1	P07384	CAPN1	82 kDa		0	0	0	0	2	0
344	Translocation protein SEC63, putative OS=Plasmodium falciparum (isolate 3D7) OX=36329 GN=PF3D7_1318800 PE=4 SV=1	Q8IEC8	PF3D7_1318800	76 kDa		0	0	1	0	0	0
345	Galectin-7 OS=Homo sapiens OX=9606 GN=LGALS7 PE=1 SV=2	P47929	LGALS7	15 kDa		0	0	0	1	10	0
82	Signal recognition particle 54 kDa protein OS=Plasmodium falciparum (isolate 3D7) OX=36329 GN=PF3D7_1450100 PE=3 SV=1	Q8IKX4	PF3D7_1450100	56 kDa	TRUE	0	0	0	0	0	0
131	Elongation factor 1-beta OS=Plasmodium falciparum (isolate 3D7) OX=36329 GN=PF3D7_0913200 PE=3 SV=1	Q8I320	PF3D7_0913200	32 kDa		0	0	2	0	0	0
90	Methionine--tRNA ligase OS=Plasmodium falciparum (isolate 3D7) OX=36329 GN=PF3D7_1034900 PE=3 SV=1	Q8IJ60	PF3D7_1034900	104 kDa		0	0	2	4	1	0
346	Cytoadherence linked asexual protein 3.1 OS=Plasmodium falciparum (isolate 3D7) OX=36329 GN=PF3D7_0302500 PE=4 SV=2	O77310	PF3D7_0302500	167 kDa	TRUE	0	0	0	0	2	1
102	Rhoptry-associated protein 1 OS=Plasmodium falciparum (isolate 3D7) OX=36329 GN=PF3D7_1410400 PE=4 SV=1	Q8ILZ1	PF3D7_1410400	90 kDa		0	0	0	1	5	2
347	26S proteasome regulatory subunit RPN11 OS=Plasmodium falciparum (isolate 3D7) OX=36329 GN=PF3D7_1368100 PE=4 SV=1	Q8ID28	PF3D7_1368100	35 kDa		0	0	0	5	0	0
348	Eukaryotic translation initiation factor 3 subunit M OS=Plasmodium falciparum (isolate 3D7) OX=36329 GN=PF3D7_0418200 PE=3 SV=1	Q8I1Q5	PF3D7_0418200	51 kDa		0	0	2	5	0	0
349	Ethanolamine kinase OS=Plasmodium falciparum (isolate 3D7) OX=36329 GN=PF3D7_1124600 PE=4 SV=1	Q8IIB7	PF3D7_1124600	50 kDa		0	0	0	2	0	0
148	26S proteasome regulatory subunit RPN1, putative OS=Plasmodium falciparum (isolate 3D7) OX=36329 GN=PF3D7_0205900 PE=3 SV=3	O96153	PF3D7_0205900	108 kDa		0	0	1	0	0	0
89	Uncharacterized protein OS=Plasmodium falciparum (isolate 3D7) OX=36329 GN=PF3D7_1036900 PE=4 SV=1	A0A143ZYL5	PF3D7_1036900	193 kDa		0	0	1	3	1	2
81	DnaJ homolog subfamily C member 16 OS=Plasmodium falciparum (isolate 3D7) OX=36329 GN=PF3D7_1108700 PE=4 SV=1	Q8IIR6	PF3D7_1108700	62 kDa		0	0	0	5	1	3
350	Phosphatidylinositol 3,4,5-trisphosphate 5-phosphatase 1 OS=Homo sapiens OX=9606 GN=INPP5D PE=1 SV=2	Q92835	INPP5D	133 kDa		0	3	2	3	2	1
351	Peroxiredoxin OS=Plasmodium falciparum (isolate 3D7) OX=36329 GN=PF3D7_1027300 PE=4 SV=1	Q8IJD0	PF3D7_1027300	44 kDa		0	0	0	1	3	1
352	Uncharacterized protein OS=Plasmodium falciparum (isolate 3D7) OX=36329 GN=PF3D7_1013200 PE=4 SV=1	Q8IJR3	PF3D7_1013200	124 kDa		0	0	1	5	5	4
353	ABC transporter E family member 1, putative OS=Plasmodium falciparum (isolate 3D7) OX=36329 GN=PF3D7_1368200 PE=4 SV=1	Q8I6Z4	PF3D7_1368200	70 kDa		0	0	2	2	0	0
354	Ras-related protein Rab-5C OS=Plasmodium falciparum (isolate 3D7) OX=36329 GN=PF3D7_0106800 PE=4 SV=2	Q8I274	PF3D7_0106800	24 kDa	TRUE	0	0	0	0	0	0
355	40S ribosomal protein S20e, putative OS=Plasmodium falciparum (isolate 3D7) OX=36329 GN=PF3D7_1003500 PE=1 SV=1	Q8IK02	PF3D7_1003500	14 kDa		0	0	2	3	1	1
78	60S ribosomal protein L1, putative OS=Plasmodium falciparum (isolate 3D7) OX=36329 GN=PF3D7_1441200 PE=3 SV=1	Q8IL58	PF3D7_1441200	25 kDa		0	1	5	2	0	0
356	Filaggrin-2 OS=Homo sapiens OX=9606 GN=FLG2 PE=1 SV=1	Q5D862	FLG2	248 kDa		0	1	1	0	4	2
357	Endoplasmic reticulum-resident calcium binding protein OS=Plasmodium falciparum (isolate 3D7) OX=36329 GN=PF3D7_1108600 PE=4 SV=1	Q8IIR7	PF3D7_1108600	39 kDa		0	0	0	1	2	1
71	Serpin B12 OS=Homo sapiens OX=9606 GN=SERPINB12 PE=1 SV=1	Q96P63	SERPINB12	46 kDa		0	0	0	0	5	0
358	Rhoptry-associated protein 2 OS=Plasmodium falciparum (isolate 3D7) OX=36329 GN=PF3D7_0501600 PE=4 SV=1	Q8I484	PF3D7_0501600	47 kDa		0	0	0	3	5	3
104	Coatomer alpha subunit, putative OS=Plasmodium falciparum (isolate 3D7) OX=36329 GN=PF3D7_0606700 PE=4 SV=1	C6KSR5	PF3D7_0606700	177 kDa		0	0	2	1	0	0
359	26S proteasome regulatory subunit p55, putative OS=Plasmodium falciparum (isolate 3D7) OX=36329 GN=PF3D7_1017900 PE=3 SV=1	Q8IJM0	PF3D7_1017900	55 kDa		0	0	0	1	0	0
138	CCT-beta OS=Plasmodium falciparum (isolate 3D7) OX=36329 GN=PF3D7_0306800 PE=3 SV=4	O97247	PF3D7_0306800	59 kDa		0	0	0	1	0	0
360	Heat shock protein 90, putative OS=Plasmodium falciparum (isolate 3D7) OX=36329 GN=PF3D7_1118200 PE=3 SV=1	Q8III6	PF3D7_1118200	108 kDa		0	0	1	2	0	0
20	Eukaryotic translation initiation factor 3 subunit E OS=Plasmodium falciparum (isolate 3D7) OX=36329 GN=PF3D7_0528200 PE=3 SV=1	Q8I3I5	PF3D7_0528200	61 kDa	TRUE	0	0	0	0	0	0
136	Replication protein A1, small OS=Plasmodium falciparum (isolate 3D7) OX=36329 GN=PF3D7_0904800 PE=4 SV=1	Q8I3A1	PF3D7_0904800	56 kDa		0	0	0	0	0	0
361	26S proteasome regulatory subunit RPN2, putative OS=Plasmodium falciparum (isolate 3D7) OX=36329 GN=PF3D7_1466300 PE=3 SV=1	Q8IKH3	PF3D7_1466300	133 kDa		0	0	0	0	0	0
362	Protein POF1B OS=Homo sapiens OX=9606 GN=POF1B PE=1 SV=3	Q8WVV4	POF1B	68 kDa		0	0	0	0	8	0
363	CUGBP Elav-like family member 2, putative OS=Plasmodium falciparum (isolate 3D7) OX=36329 GN=PF3D7_1409800 PE=4 SV=1	Q8ILZ7	PF3D7_1409800	59 kDa		0	0	0	0	0	0
364	26S proteasome regulatory subunit RPN6 OS=Plasmodium falciparum (isolate 3D7) OX=36329 GN=PF3D7_1402300 PE=3 SV=1	Q8IM66	PF3D7_1402300	78 kDa		0	0	0	0	0	0
365	tRNA import protein tRIP OS=Plasmodium falciparum (isolate 3D7) OX=36329 GN=PF3D7_1442300 PE=4 SV=1	Q8IL48	PF3D7_1442300	46 kDa		0	0	0	0	0	0
366	Protein SIS1 OS=Plasmodium falciparum (isolate 3D7) OX=36329 GN=PF3D7_0213100 PE=4 SV=1	O96212	PF3D7_0213100	37 kDa		0	1	2	1	4	1
84	Uncharacterized protein OS=Plasmodium falciparum (isolate 3D7) OX=36329 GN=PF3D7_0108300 PE=4 SV=2	Q8I259	PF3D7_0108300	255 kDa		0	0	1	2	1	0
367	40S ribosomal protein S21 OS=Plasmodium falciparum (isolate 3D7) OX=36329 GN=PF3D7_1144000 PE=1 SV=1	Q8IHS5	PF3D7_1144000	9 kDa		0	1	2	1	4	2
368	Eukaryotic translation initiation factor 4C OS=Plasmodium falciparum (isolate 3D7) OX=36329 GN=PF3D7_1143400 PE=3 SV=2	Q8IHT2	PF3D7_1143400	18 kDa		0	0	0	1	1	5
99	V-type proton ATPase catalytic subunit A OS=Plasmodium falciparum (isolate 3D7) OX=36329 GN=vapA PE=1 SV=1	Q76NM6	vapA	69 kDa		0	0	1	2	0	0
369	Hsc70-interacting protein OS=Plasmodium falciparum (isolate 3D7) OX=36329 GN=PF3D7_0527500 PE=3 SV=1	Q8I3J0	PF3D7_0527500	51 kDa		0	0	2	2	0	2
370	40S ribosomal protein S27 OS=Plasmodium falciparum (isolate 3D7) OX=36329 GN=PF3D7_1308300 PE=1 SV=1	Q8IEN2	PF3D7_1308300	9 kDa		0	0	1	3	4	4
371	FACT complex subunit SSRP1 OS=Plasmodium falciparum (isolate 3D7) OX=36329 GN=PF3D7_1441400 PE=3 SV=1	Q8IL56	PF3D7_1441400	59 kDa		0	0	0	0	0	0
67	Acyl-CoA synthetase OS=Plasmodium falciparum (isolate 3D7) OX=36329 GN=PF3D7_1238800 PE=4 SV=1	Q8I535	PF3D7_1238800	92 kDa		0	0	0	0	0	0
372	Eukaryotic translation initiation factor 3 subunit L OS=Plasmodium falciparum (isolate 3D7) OX=36329 GN=PF3D7_0612100 PE=3 SV=1	C6KSW5	PF3D7_0612100	78 kDa		0	0	0	4	0	0
373	Importin subunit alpha OS=Plasmodium falciparum (isolate 3D7) OX=36329 GN=PF3D7_0812400 PE=3 SV=1	Q8IAW0	PF3D7_0812400	61 kDa		0	0	2	1	2	1
374	Acid phosphatase OS=Plasmodium falciparum (isolate 3D7) OX=36329 GN=PF3D7_0918000 PE=1 SV=1	Q8I2X3	PF3D7_0918000	45 kDa		0	0	1	0	1	1
375	High mobility group protein B2 OS=Plasmodium falciparum (isolate 3D7) OX=36329 GN=PF3D7_0817900 PE=1 SV=1	Q8IB14	PF3D7_0817900	12 kDa		0	0	0	0	4	3
376	DnaJ protein, putative OS=Plasmodium falciparum (isolate 3D7) OX=36329 GN=PF3D7_0823800 PE=4 SV=1	Q8IB72	PF3D7_0823800	77 kDa		0	0	0	1	0	0
377	Adenosylhomocysteinase OS=Plasmodium falciparum (isolate 3D7) OX=36329 GN=PFE1050w PE=1 SV=2	P50250	PFE1050w	54 kDa		0	0	2	2	1	1
378	Lysine-rich membrane-associated PHISTb protein OS=Plasmodium falciparum (isolate 3D7) OX=36329 GN=PF3D7_0532400 PE=4 SV=1	Q8I3F0	PF3D7_0532400	61 kDa		0	3	2	1	0	0
379	Profilin OS=Plasmodium falciparum (isolate 3D7) OX=36329 GN=Pfn PE=3 SV=1	Q8I2J4	Pfn	19 kDa		0	0	0	1	3	2
380	Flotillin-1 OS=Homo sapiens OX=9606 GN=FLOT1 PE=1 SV=3	O75955	FLOT1	47 kDa		0	0	1	0	0	0
381	DNA helicase OS=Plasmodium falciparum (isolate 3D7) OX=36329 GN=PF3D7_1211700 PE=3 SV=1	Q8I5T4	PF3D7_1211700	86 kDa		0	0	1	1	0	0
382	Beta-adducin OS=Homo sapiens OX=9606 GN=ADD2 PE=1 SV=3	P35612	ADD2	81 kDa	TRUE	0	0	0	5	0	1
383	Coatomer subunit delta OS=Plasmodium falciparum (isolate 3D7) OX=36329 GN=PF3D7_1134800 PE=3 SV=1	Q8II16	PF3D7_1134800	57 kDa		0	0	0	4	0	0
384	26S proteasome regulatory subunit RPN3, putative OS=Plasmodium falciparum (isolate 3D7) OX=36329 GN=PF3D7_1338100 PE=3 SV=1	A0A5K1K9F3	PF3D7_1338100	59 kDa		0	0	0	2	0	0
385	RNA-binding protein, putative OS=Plasmodium falciparum (isolate 3D7) OX=36329 GN=PF3D7_0823200 PE=4 SV=1	Q8IB66	PF3D7_0823200	32 kDa		0	0	0	1	0	0
386	Uncharacterized protein OS=Plasmodium falciparum (isolate 3D7) OX=36329 GN=PF3D7_1409600 PE=4 SV=1	Q8ILZ9	PF3D7_1409600	93 kDa		1	2	1	2	1	1
387	Immunoglobulin kappa constant OS=Homo sapiens OX=9606 GN=IGKC PE=1 SV=2	P01834	IGKC	12 kDa		0	2	1	5	1	0
388	Cofilin/actin-depolymerizing factor homolog 1 OS=Plasmodium falciparum (isolate 3D7) OX=36329 GN=PFE0165w PE=1 SV=1	Q8I467	PFE0165w	14 kDa		0	0	3	2	3	1
389	60 kDa chaperonin OS=Plasmodium falciparum (isolate 3D7) OX=36329 GN=PF3D7_1232100 PE=3 SV=2	Q8I0V3	PF3D7_1232100	81 kDa		0	0	0	3	0	1
390	Putative chloroquine resistance transporter OS=Plasmodium falciparum (isolate 3D7) OX=36329 GN=CG10 PE=3 SV=1	Q8IBZ9	CG10	49 kDa		0	0	1	2	0	2
391	High molecular weight rhoptry protein 3 OS=Plasmodium falciparum (isolate 3D7) OX=36329 GN=PF3D7_0905400 PE=4 SV=1	Q8I395	PF3D7_0905400	105 kDa		0	0	0	1	2	1
392	Peptidyl-prolyl cis-trans isomerase OS=Plasmodium falciparum (isolate 3D7) OX=36329 GN=PF3D7_0322000 PE=3 SV=1	Q76NN7	PF3D7_0322000	19 kDa	TRUE	0	0	1	3	2	0
393	Importin-7, putative OS=Plasmodium falciparum (isolate 3D7) OX=36329 GN=PF3D7_0706000 PE=4 SV=1	C0H4L1	PF3D7_0706000	146 kDa		0	0	2	1	0	0
394	Annexin A2 OS=Homo sapiens OX=9606 GN=ANXA2 PE=1 SV=2	P07355	ANXA2	39 kDa		0	0	0	0	7	0
395	Uncharacterized protein OS=Plasmodium falciparum (isolate 3D7) OX=36329 GN=PF3D7_0617200 PE=4 SV=1	C6KT13	PF3D7_0617200	53 kDa		0	0	0	2	0	0
396	Inner membrane complex protein 1e, putative OS=Plasmodium falciparum (isolate 3D7) OX=36329 GN=PF3D7_0304100 PE=4 SV=1	O97229	PF3D7_0304100	62 kDa		0	0	0	0	5	1
397	Heat shock protein beta-1 OS=Homo sapiens OX=9606 GN=HSPB1 PE=1 SV=2	P04792	HSPB1	23 kDa		0	0	0	0	10	0
398	26S protease regulatory subunit 6B, putative OS=Plasmodium falciparum (isolate 3D7) OX=36329 GN=PF3D7_0413600 PE=3 SV=1	Q8I1V1	PF3D7_0413600	45 kDa		0	0	0	0	0	0
399	Eukaryotic translation initiation factor 2 subunit beta OS=Plasmodium falciparum (isolate 3D7) OX=36329 GN=PF3D7_1010600 PE=3 SV=1	Q8IJT9	PF3D7_1010600	25 kDa		0	0	0	0	0	0
400	Ubiquitin-conjugating enzyme E2, putative OS=Plasmodium falciparum (isolate 3D7) OX=36329 GN=PF3D7_0921000.1 PE=3 SV=1	Q8I2U3	PF3D7_0921000	19 kDa		0	0	0	0	0	0
401	Nucleolar GTP-binding protein 1 OS=Plasmodium falciparum (isolate 3D7) OX=36329 GN=PF3D7_0612900 PE=3 SV=1	C6KSX2	PF3D7_0612900	80 kDa		0	0	0	0	1	3
402	60S acidic ribosomal protein P2 OS=Plasmodium falciparum (isolate 3D7) OX=36329 GN=MAL3P3.19 PE=3 SV=1	O00806	MAL3P3	12 kDa		0	0	1	3	2	2
403	Calcyclin-binding protein OS=Plasmodium falciparum (isolate 3D7) OX=36329 GN=PF3D7_1238100 PE=4 SV=2	Q8I542	PF3D7_1238100	27 kDa		0	0	1	1	1	0
39	Protein-glutamine gamma-glutamyltransferase E OS=Homo sapiens OX=9606 GN=TGM3 PE=1 SV=4	Q08188	TGM3	77 kDa		0	0	0	0	3	1
404	Thrombospondin-1 OS=Homo sapiens OX=9606 GN=THBS1 PE=1 SV=2	P07996	THBS1	129 kDa		0	0	1	1	2	3
405	Golgi-associated plant pathogenesis-related protein 1 OS=Homo sapiens OX=9606 GN=GLIPR2 PE=1 SV=3	Q9H4G4	GLIPR2	17 kDa		0	1	3	2	0	2
406	Peroxiredoxin-6 OS=Homo sapiens OX=9606 GN=PRDX6 PE=1 SV=3	P30041	PRDX6	25 kDa		0	0	1	1	1	2
407	Eukaryotic translation initiation factor 3 subunit D OS=Plasmodium falciparum (isolate 3D7) OX=36329 GN=PF3D7_1007900 PE=3 SV=1	Q8IJW4	PF3D7_1007900	63 kDa		0	0	0	4	0	1
408	Aspartyl-tRNA synthetase OS=Plasmodium falciparum (isolate 3D7) OX=36329 GN=PF3D7_0102900 PE=3 SV=1	Q8I2B1	PF3D7_0102900	73 kDa		0	0	0	2	0	0
409	M17 leucyl aminopeptidase OS=Plasmodium falciparum (isolate 3D7) OX=36329 GN=PF3D7_1446200 PE=1 SV=1	Q8IL11	PF3D7_1446200	68 kDa		0	0	1	6	1	0
410	26S proteasome regulatory subunit RPN9, putative OS=Plasmodium falciparum (isolate 3D7) OX=36329 GN=PF3D7_1030500 PE=3 SV=1	Q8IJA0	PF3D7_1030500	47 kDa		0	0	2	0	0	0
411	Uncharacterized protein OS=Plasmodium falciparum (isolate 3D7) OX=36329 GN=PF3D7_1105800 PE=4 SV=2	Q8IIU5	PF3D7_1105800	31 kDa		0	0	0	3	0	0
412	Alpha-adducin OS=Homo sapiens OX=9606 GN=ADD1 PE=1 SV=2	P35611	ADD1	81 kDa	TRUE	0	0	0	5	0	1
413	Uncharacterized protein OS=Plasmodium falciparum (isolate 3D7) OX=36329 GN=PF3D7_1122500 PE=4 SV=1	Q8IIE1	PF3D7_1122500	231 kDa		0	0	4	3	0	0
414	Uncharacterized protein OS=Plasmodium falciparum (isolate 3D7) OX=36329 GN=PF3D7_1006700 PE=4 SV=2	Q8IJX4	PF3D7_1006700	46 kDa		0	0	0	3	0	0
415	Eukaryotic initiation factor 4A-III, putative OS=Plasmodium falciparum (isolate 3D7) OX=36329 GN=PF3D7_0422700 PE=3 SV=1	Q8IFN9	PF3D7_0422700	45 kDa	TRUE	0	0	1	0	0	0
416	cAMP-dependent protein kinase regulatory subunit OS=Plasmodium falciparum (isolate 3D7) OX=36329 GN=PF3D7_1223100 PE=1 SV=1	Q7KQK0	PF3D7_1223100	51 kDa		0	0	0	0	0	0
417	Phosphoinositide phosphatase SAC1 OS=Plasmodium falciparum (isolate 3D7) OX=36329 GN=PF3D7_1354200 PE=4 SV=1	Q8IDF9	PF3D7_1354200	95 kDa		0	0	0	0	0	0
418	DNA helicase OS=Plasmodium falciparum (isolate 3D7) OX=36329 GN=PF3D7_1355100 PE=3 SV=1	Q8IDF0	PF3D7_1355100	106 kDa		0	0	0	0	0	0
419	PRESAN domain-containing protein OS=Plasmodium falciparum (isolate 3D7) OX=36329 GN=PF3D7_0936800 PE=1 SV=1	Q8I2F2	PF3D7_0936800	46 kDa		0	0	0	0	0	0
420	Histone H1.3 OS=Homo sapiens OX=9606 GN=H1-3 PE=1 SV=2	P16402	H1-3	22 kDa	TRUE	0	1	1	1	2	3
421	1-cys peroxiredoxin OS=Plasmodium falciparum (isolate 3D7) OX=36329 GN=PF3D7_0802200 PE=3 SV=1	Q8IAM2	PF3D7_0802200	25 kDa		0	0	1	2	0	0
422	Hypoxanthine phosphoribosyltransferase OS=Plasmodium falciparum (isolate 3D7) OX=36329 GN=PF3D7_1012400 PE=3 SV=1	Q8IJS1	PF3D7_1012400	26 kDa		0	0	1	2	1	0
156	PHAX domain-containing protein, putative OS=Plasmodium falciparum (isolate 3D7) OX=36329 GN=PF3D7_1021900 PE=4 SV=1	Q8IJI4	PF3D7_1021900	267 kDa		0	1	1	1	0	0
423	ATP-dependent RNA helicase DBP10, putative OS=Plasmodium falciparum (isolate 3D7) OX=36329 GN=PF3D7_0827000 PE=4 SV=1	Q8IBA2	PF3D7_0827000	151 kDa		0	2	1	3	2	0
424	Dermcidin OS=Homo sapiens OX=9606 GN=DCD PE=1 SV=2	P81605	DCD	11 kDa		0	2	1	0	3	2
425	Ras-related C3 botulinum toxin substrate 1 OS=Homo sapiens OX=9606 GN=RAC1 PE=1 SV=1	P63000	RAC1	21 kDa		0	0	0	1	1	1
87	Protein kinase PK4 OS=Plasmodium falciparum (isolate 3D7) OX=36329 GN=PF3D7_0628200 PE=4 SV=1	C6KTB8	PF3D7_0628200	364 kDa		0	0	0	0	0	0
426	Vacuolar proton pump subunit B OS=Plasmodium falciparum (isolate 3D7) OX=36329 GN=PF3D7_0406100 PE=3 SV=1	Q6ZMA8	PF3D7_0406100	56 kDa		0	0	2	2	0	0
427	ATP-dependent zinc metalloprotease FTSH, putative OS=Plasmodium falciparum (isolate 3D7) OX=36329 GN=PF3D7_1464900 PE=4 SV=1	Q8IKI9	PF3D7_1464900	80 kDa		0	0	0	2	0	0
428	Eukaryotic translation initiation factor 4E OS=Plasmodium falciparum (isolate 3D7) OX=36329 GN=PF3D7_0315100 PE=3 SV=1	O97266	PF3D7_0315100	27 kDa		0	0	0	1	0	1
429	Proteasome subunit alpha type-2, putative OS=Plasmodium falciparum (isolate 3D7) OX=36329 GN=PF3D7_0608500 PE=1 SV=1	C6KST3	PF3D7_0608500	27 kDa		0	0	2	1	0	0
430	Myeloperoxidase OS=Homo sapiens OX=9606 GN=MPO PE=1 SV=1	P05164	MPO	84 kDa	TRUE	0	0	0	2	1	2
431	Inter-alpha-trypsin inhibitor heavy chain H4 OS=Homo sapiens OX=9606 GN=ITIH4 PE=1 SV=4	Q14624	ITIH4	103 kDa		0	0	0	0	3	4
432	Dihydrofolate reductase OS=Homo sapiens OX=9606 GN=DHFR PE=1 SV=2	P00374	DHFR	21 kDa		0	0	0	0	0	0
433	Casein kinase 2, alpha subunit OS=Plasmodium falciparum (isolate 3D7) OX=36329 GN=PF3D7_1108400 PE=1 SV=1	Q8IIR9	PF3D7_1108400	40 kDa		0	0	0	1	0	0
152	Uncharacterized protein OS=Plasmodium falciparum (isolate 3D7) OX=36329 GN=PF3D7_1352400 PE=4 SV=1	A0A5K1K907	PF3D7_1352400	190 kDa		0	0	0	0	0	0
434	RuvB-like helicase OS=Plasmodium falciparum (isolate 3D7) OX=36329 GN=PF3D7_1362200 PE=3 SV=1	Q8ID85	PF3D7_1362200	55 kDa		0	0	1	0	0	0
435	Protein GCN20 OS=Plasmodium falciparum (isolate 3D7) OX=36329 GN=PF3D7_1121700 PE=4 SV=1	Q8IIE9	PF3D7_1121700	95 kDa		0	0	0	1	0	0
436	RNA-binding protein, putative OS=Plasmodium falciparum (isolate 3D7) OX=36329 GN=PF3D7_0605100 PE=4 SV=1	C6KSP9	PF3D7_0605100	86 kDa		0	0	0	0	0	0
437	DNA replication licensing factor MCM3, putative OS=Plasmodium falciparum (isolate 3D7) OX=36329 GN=PF3D7_0527000 PE=3 SV=1	Q8I3J5	PF3D7_0527000	110 kDa		0	0	0	0	0	0
438	Eukaryotic translation initiation factor 3 subunit F, putative OS=Plasmodium falciparum (isolate 3D7) OX=36329 GN=PF3D7_0918300 PE=4 SV=1	Q8I2X0	PF3D7_0918300	37 kDa		0	0	0	0	0	0
439	CUGBP Elav-like family member 1 OS=Plasmodium falciparum (isolate 3D7) OX=36329 GN=PF3D7_1359400 PE=4 SV=1	Q8IDB7	PF3D7_1359400	57 kDa		0	0	0	0	0	0
440	Ras-related protein Rap-1A OS=Homo sapiens OX=9606 GN=RAP1A PE=1 SV=1	P62834	RAP1A	21 kDa	TRUE	0	0	0	1	1	0
73	Nucleoporin NUP637, putative OS=Plasmodium falciparum (isolate 3D7) OX=36329 GN=PF3D7_0609000 PE=4 SV=1	C6KST7	PF3D7_0609000	721 kDa		0	0	1	2	0	0
441	Skin-specific protein 32 OS=Homo sapiens OX=9606 GN=XP32 PE=1 SV=1	Q5T750	XP32	26 kDa		0	0	0	2	1	1
442	Parasitophorous vacuolar protein 5, putative OS=Plasmodium falciparum (isolate 3D7) OX=36329 GN=PF3D7_0925900 PE=1 SV=1	Q8I2Q0	PF3D7_0925900	25 kDa		0	0	2	1	3	1
74	Ribonuclease, putative OS=Plasmodium falciparum (isolate 3D7) OX=36329 GN=PF3D7_0615400 PE=4 SV=2	C6KSZ5	PF3D7_0615400	323 kDa		0	0	2	3	0	0
443	Autophagy-related protein OS=Plasmodium falciparum (isolate 3D7) OX=36329 GN=PF3D7_1019900 PE=1 SV=1	Q8IJK2	PF3D7_1019900	15 kDa		0	0	0	1	0	1
69	Caspase-14 OS=Homo sapiens OX=9606 GN=CASP14 PE=1 SV=2	P31944	CASP14	28 kDa		0	0	1	0	2	0
109	Deoxyribodipyrimidine photo-lyase, putative OS=Plasmodium falciparum (isolate 3D7) OX=36329 GN=PF3D7_0513600 PE=4 SV=1	Q8I0W8	PF3D7_0513600	129 kDa		0	0	0	2	0	0
132	Protein transport protein SEC61 subunit alpha OS=Plasmodium falciparum (isolate 3D7) OX=36329 GN=PF3D7_1346100 PE=3 SV=1	Q8IDN6	PF3D7_1346100	52 kDa		0	0	0	1	0	0
444	Nascent polypeptide-associated complex subunit beta OS=Plasmodium falciparum (isolate 3D7) OX=36329 GN=PF3D7_1426100 PE=3 SV=1	Q8ILK2	PF3D7_1426100	19 kDa		0	0	0	3	1	1
445	Exportin-1, putative OS=Plasmodium falciparum (isolate 3D7) OX=36329 GN=PF3D7_0302900 PE=4 SV=2	O77312	PF3D7_0302900	148 kDa		0	0	1	2	0	0
446	T-complex protein 1 subunit eta OS=Plasmodium falciparum (isolate 3D7) OX=36329 GN=MAL3P3.6 PE=3 SV=1	O77323	MAL3P3	60 kDa		0	0	2	1	0	0
447	Signal peptidase complex subunit 2 OS=Plasmodium falciparum (isolate 3D7) OX=36329 GN=PF3D7_0320700 PE=3 SV=1	Q9NFA0	PF3D7_0320700	21 kDa		0	0	1	1	0	0
448	40S ribosomal protein S12 OS=Plasmodium falciparum (isolate 3D7) OX=36329 GN=RPS12 PE=1 SV=1	O97249	RPS12	15 kDa		0	0	0	3	0	0
449	Acyl-CoA synthetase OS=Plasmodium falciparum (isolate 3D7) OX=36329 GN=PF3D7_0619500 PE=4 SV=1	C6KT35	PF3D7_0619500	164 kDa		0	0	0	1	0	0
450	Nucleosome assembly protein OS=Plasmodium falciparum (isolate 3D7) OX=36329 GN=PF3D7_0919000 PE=3 SV=1	Q8I2W3	PF3D7_0919000	32 kDa		0	0	0	1	3	0
451	Epiplakin OS=Homo sapiens OX=9606 GN=EPPK1 PE=1 SV=3	P58107	EPPK1	556 kDa	TRUE	0	0	0	0	5	0
452	Translation initiation factor IF-2, putative OS=Plasmodium falciparum (isolate 3D7) OX=36329 GN=PF3D7_0607000 PE=4 SV=1	C6KSR8	PF3D7_0607000	112 kDa		0	0	0	0	0	0
453	RuvB-like helicase OS=Plasmodium falciparum (isolate 3D7) OX=36329 GN=PF3D7_1106000 PE=3 SV=1	Q8IIU3	PF3D7_1106000	53 kDa		0	0	0	3	0	0
40	Glutaredoxin-like protein OS=Plasmodium falciparum (isolate 3D7) OX=36329 GN=PF3D7_0606900 PE=4 SV=1	C6KSR7	PF3D7_0606900	26 kDa		0	0	0	0	0	0
454	Haloacid dehalogenase-like hydrolase OS=Plasmodium falciparum (isolate 3D7) OX=36329 GN=PF3D7_1033400 PE=1 SV=1	Q8IJ74	PF3D7_1033400	33 kDa		0	0	1	0	0	0
455	Protein A CONTAMINANT OS=Staphylococcus aureus GN=SpA PE=4 SV=1	Q53779		51 kDa		0	0	0	0	0	1
456	Replication factor C subunit 3, putative OS=Plasmodium falciparum (isolate 3D7) OX=36329 GN=PF3D7_1463200 PE=3 SV=1	Q8IKK4	PF3D7_1463200	39 kDa		1	0	0	0	0	0
457	RNA-binding protein, putative OS=Plasmodium falciparum (isolate 3D7) OX=36329 GN=PF3D7_1360900.1 PE=4 SV=2	C0H5J5	PF3D7_1360900	45 kDa		0	0	0	2	0	0
142	Chaperone protein ClpB1 OS=Plasmodium falciparum (isolate 3D7) OX=36329 GN=PF3D7_0816600 PE=1 SV=1	Q8IB03	PF3D7_0816600	123 kDa		0	0	0	0	0	0
458	Choline-phosphate cytidylyltransferase OS=Plasmodium falciparum (isolate 3D7) OX=36329 GN=PF3D7_1316600 PE=1 SV=1	Q8IEE9	PF3D7_1316600	105 kDa		0	0	0	0	0	0
459	Selenide water dikinase, putative OS=Plasmodium falciparum (isolate 3D7) OX=36329 GN=PF3D7_0910400 PE=4 SV=1	Q8I348	PF3D7_0910400	140 kDa		0	0	0	0	0	0
460	Ras-related protein Rab-5B OS=Plasmodium falciparum (isolate 3D7) OX=36329 GN=PF3D7_1310600 PE=4 SV=1	Q76NM7	PF3D7_1310600	23 kDa		0	0	0	0	0	0
461	G-protein associated signal transduction protein, putative OS=Plasmodium falciparum (isolate 3D7) OX=36329 GN=PF3D7_0607400 PE=3 SV=1	C6KSS2	PF3D7_0607400	76 kDa		0	0	0	0	0	0
462	Prodrug activation and resistance esterase OS=Plasmodium falciparum (isolate 3D7) OX=36329 GN=PF3D7_0709700 PE=4 SV=1	Q8IBZ2	PF3D7_0709700	42 kDa		0	0	0	0	0	0
463	Multidrug resistance protein 2 OS=Plasmodium falciparum (isolate 3D7) OX=36329 GN=PF3D7_1447900 PE=4 SV=1	Q8IKZ6	PF3D7_1447900	119 kDa		0	0	0	0	0	0
464	UMP-CMP kinase, putative OS=Plasmodium falciparum (isolate 3D7) OX=36329 GN=PF3D7_0111500 PE=3 SV=1	Q8I231	PF3D7_0111500	44 kDa		0	0	0	0	0	0
465	Uncharacterized protein OS=Plasmodium falciparum (isolate 3D7) OX=36329 GN=PF3D7_1013300 PE=4 SV=1	Q8IJR2	PF3D7_1013300	75 kDa		0	0	0	0	0	0
88	Nucleoside transporter 2 OS=Plasmodium falciparum (isolate 3D7) OX=36329 GN=PF3D7_0824400 PE=3 SV=1	Q8IB78	PF3D7_0824400	68 kDa		0	0	0	0	0	0
100	Rhoptry neck protein 3 OS=Plasmodium falciparum (isolate 3D7) OX=36329 GN=PF3D7_1252100 PE=4 SV=1	Q8I4R5	PF3D7_1252100	263 kDa		0	0	0	0	1	0
466	Uncharacterized protein OS=Plasmodium falciparum (isolate 3D7) OX=36329 GN=PF3D7_1206800 PE=4 SV=1	Q8I5X7	PF3D7_1206800	86 kDa		0	0	1	2	0	0
111	RNA-binding protein, putative OS=Plasmodium falciparum (isolate 3D7) OX=36329 GN=PF3D7_0929200 PE=4 SV=1	C0H570	PF3D7_0929200	34 kDa		0	0	0	0	1	0
467	Serpin B3 OS=Homo sapiens OX=9606 GN=SERPINB3 PE=1 SV=2	P29508	SERPINB3	45 kDa		0	0	0	0	4	0
468	DnaJ protein, putative OS=Plasmodium falciparum (isolate 3D7) OX=36329 GN=PF3D7_0919100 PE=4 SV=1	Q8I2W2	PF3D7_0919100	43 kDa		0	0	0	0	0	0
469	Protein transport protein SEC22 OS=Plasmodium falciparum (isolate 3D7) OX=36329 GN=PF3D7_0320100 PE=3 SV=2	O97323	PF3D7_0320100	26 kDa		0	0	0	1	0	0
43	Protein S100-A7 OS=Homo sapiens OX=9606 GN=S100A7 PE=1 SV=4	P31151	S100A7	11 kDa		0	0	0	0	0	0
470	Uncharacterized protein OS=Plasmodium falciparum (isolate 3D7) OX=36329 GN=PF3D7_1464500 PE=4 SV=2	Q8IKJ2	PF3D7_1464500	389 kDa		0	0	0	0	0	0
471	Heterochromatin protein 1 OS=Plasmodium falciparum (isolate 3D7) OX=36329 GN=PF3D7_1220900 PE=1 SV=1	Q8I5K4	PF3D7_1220900	31 kDa		0	0	0	1	0	0
166	26S proteasome regulatory subunit RPN8, putative OS=Plasmodium falciparum (isolate 3D7) OX=36329 GN=PF3D7_0912900 PE=3 SV=1	Q8I323	PF3D7_0912900	39 kDa		0	0	0	0	0	0
472	Multidrug resistance-associated protein 1 OS=Plasmodium falciparum (isolate 3D7) OX=36329 GN=PF3D7_0112200 PE=4 SV=1	Q9U0N4	PF3D7_0112200	214 kDa		0	0	0	0	0	0
473	W2 domain-containing protein OS=Plasmodium falciparum (isolate 3D7) OX=36329 GN=PF3D7_1213900 PE=4 SV=1	A0A144A0U7	PF3D7_1213900	135 kDa		0	0	0	0	0	0
107	Syntaxin, Qa-SNARE family OS=Plasmodium falciparum (isolate 3D7) OX=36329 GN=PF3D7_1432000 PE=4 SV=1	Q8ILE4	PF3D7_1432000	53 kDa		0	0	0	0	0	0
474	Glutamine--tRNA ligase OS=Plasmodium falciparum (isolate 3D7) OX=36329 GN=PF3D7_1331700 PE=3 SV=1	Q8IE10	PF3D7_1331700	109 kDa		0	0	0	0	0	0
475	Peptidyl-prolyl cis-trans isomerase FKBP35 OS=Plasmodium falciparum (isolate 3D7) OX=36329 GN=FKBP35 PE=1 SV=1	Q8I4V8	FKBP35	35 kDa		0	0	0	0	0	0
147	Histone-arginine methyltransferase CARM1, putative OS=Plasmodium falciparum (isolate 3D7) OX=36329 GN=PF3D7_0811500 PE=4 SV=1	A0A5K1K956	PF3D7_0811500	108 kDa		0	0	0	0	0	0
476	Glycogen synthase kinase 3 OS=Plasmodium falciparum (isolate 3D7) OX=36329 GN=PF3D7_0312400 PE=3 SV=2	O77344	PF3D7_0312400	52 kDa		0	0	0	0	0	0
114	Ras-related protein Rab-5A OS=Plasmodium falciparum (isolate 3D7) OX=36329 GN=PF3D7_0211200 PE=1 SV=1	O96193	PF3D7_0211200	27 kDa		0	0	0	0	0	0
477	Mitochondrial ribosomal protein L41, putative OS=Plasmodium falciparum (isolate 3D7) OX=36329 GN=PF3D7_0604200 PE=3 SV=1	C6KSP0	PF3D7_0604200	10 kDa		0	0	0	0	0	0
478	High mobility group protein B1 OS=Plasmodium falciparum (isolate 3D7) OX=36329 GN=PF3D7_1202900 PE=4 SV=1	Q8I616	PF3D7_1202900	11 kDa		0	0	1	1	2	1
479	Protein DJ-1 OS=Plasmodium falciparum (isolate 3D7) OX=36329 GN=PF3D7_0627500 PE=4 SV=1	C6KTB1	PF3D7_0627500	20 kDa		0	0	1	1	1	0
153	Cofilin-1 OS=Homo sapiens OX=9606 GN=CFL1 PE=1 SV=3	P23528	CFL1	19 kDa		0	1	0	3	1	1
480	Guanidine nucleotide exchange factor OS=Plasmodium falciparum (isolate 3D7) OX=36329 GN=PF3D7_0508500 PE=4 SV=1	Q8I418	PF3D7_0508500	304 kDa		0	0	1	0	0	2
481	C-C motif chemokine 5 OS=Homo sapiens OX=9606 GN=CCL5 PE=1 SV=3	P13501	CCL5	10 kDa		0	1	1	2	0	1
482	GBP130 protein OS=Plasmodium falciparum (isolate 3D7) OX=36329 GN=PF3D7_1016300 PE=4 SV=1	A0A143ZWU2	PF3D7_1016300	96 kDa		0	0	0	2	1	1
483	Purine nucleoside phosphorylase OS=Plasmodium falciparum (isolate 3D7) OX=36329 GN=PNP PE=1 SV=1	Q8I3X4	PNP	27 kDa		0	0	2	1	0	0
75	Translational activator GCN1, putative OS=Plasmodium falciparum (isolate 3D7) OX=36329 GN=PF3D7_1305300 PE=3 SV=1	C0H5A0	PF3D7_1305300	419 kDa		0	0	0	0	0	0
484	Protein phosphatase PPM2 OS=Plasmodium falciparum (isolate 3D7) OX=36329 GN=PF3D7_1138500 PE=3 SV=2	Q8IHY0	PF3D7_1138500	105 kDa		0	0	1	0	0	0
485	Proliferating cell nuclear antigen OS=Plasmodium falciparum (isolate 3D7) OX=36329 GN=PCNA PE=3 SV=1	P61074	PCNA	31 kDa		0	0	1	0	2	1
486	Thioredoxin-like mero protein OS=Plasmodium falciparum (isolate 3D7) OX=36329 GN=PF3D7_1104400 PE=4 SV=1	Q8IIV8	PF3D7_1104400	49 kDa		0	0	0	1	0	0
487	Plasmepsin II OS=Plasmodium falciparum (isolate 3D7) OX=36329 GN=PF3D7_1408000 PE=1 SV=1	Q8I6V3	PF3D7_1408000	51 kDa	TRUE	0	0	0	2	1	1
488	Thioredoxin OS=Homo sapiens OX=9606 GN=TXN PE=1 SV=3	P10599	TXN	12 kDa		0	0	0	0	3	0
489	Hexose transporter OS=Plasmodium falciparum (isolate 3D7) OX=36329 GN=PF3D7_0204700 PE=3 SV=1	Q7KWJ5	PF3D7_0204700	56 kDa		0	0	0	1	0	0
165	M1-family alanyl aminopeptidase OS=Plasmodium falciparum (isolate 3D7) OX=36329 GN=PF3D7_1311800 PE=1 SV=1	Q8IEK1	PF3D7_1311800	126 kDa		0	0	0	1	2	0
490	FACT complex subunit OS=Plasmodium falciparum (isolate 3D7) OX=36329 GN=PF3D7_0517400 PE=3 SV=1	Q8I3T4	PF3D7_0517400	133 kDa		0	0	0	1	0	0
491	Clustered-asparagine-rich protein OS=Plasmodium falciparum (isolate 3D7) OX=36329 GN=PF3D7_1236100 PE=4 SV=2	Q8I562	PF3D7_1236100	52 kDa		0	1	0	0	0	0
492	Uncharacterized protein OS=Plasmodium falciparum (isolate 3D7) OX=36329 GN=PF3D7_0318700 PE=4 SV=1	Q9NDU5	PF3D7_0318700	14 kDa		0	0	0	0	3	1
146	Uncharacterized protein OS=Plasmodium falciparum (isolate 3D7) OX=36329 GN=PF3D7_0726400 PE=4 SV=1	C0H4P4	PF3D7_0726400	599 kDa		0	0	0	0	0	0
493	Tetratricopeptide repeat protein, putative OS=Plasmodium falciparum (isolate 3D7) OX=36329 GN=PF3D7_1205600 PE=4 SV=1	Q8I5Y9	PF3D7_1205600	39 kDa		0	0	0	0	0	0
494	DNA-directed RNA polymerase II subunit RPB3, putative OS=Plasmodium falciparum (isolate 3D7) OX=36329 GN=PF3D7_0923000 PE=3 SV=1	Q8I2S6	PF3D7_0923000	38 kDa		0	0	0	0	0	0
495	Bifunctional farnesyl/geranylgeranyl diphosphate synthase OS=Plasmodium falciparum (isolate 3D7) OX=36329 GN=PF3D7_1128400 PE=3 SV=2	Q8II79	PF3D7_1128400	44 kDa		0	0	0	0	0	0
496	HSP90 co-chaperone p23 OS=Plasmodium falciparum (isolate 3D7) OX=36329 GN=PF3D7_1453700 PE=4 SV=2	Q8IKU1	PF3D7_1453700	30 kDa		0	0	0	0	0	0
497	Cornifin-A OS=Homo sapiens OX=9606 GN=SPRR1A PE=1 SV=2	P35321	SPRR1A	10 kDa		0	0	0	0	5	0
498	Ras-related protein Rap-2b OS=Homo sapiens OX=9606 GN=RAP2B PE=1 SV=1	P61225	RAP2B	21 kDa		0	0	0	0	0	0
499	Flavin reductase (NADPH) OS=Homo sapiens OX=9606 GN=BLVRB PE=1 SV=3	P30043	BLVRB	22 kDa		0	0	0	1	2	1
500	Nucleolar protein 5, putative OS=Plasmodium falciparum (isolate 3D7) OX=36329 GN=PF3D7_1008800 PE=3 SV=1	Q8IJV7	PF3D7_1008800	53 kDa		0	0	1	0	0	1
501	Platelet factor 4 OS=Homo sapiens OX=9606 GN=PF4 PE=1 SV=2	P02776	PF4	11 kDa		0	0	0	0	2	1
502	60S ribosomal protein L34 OS=Homo sapiens OX=9606 GN=RPL34 PE=1 SV=3	P49207	RPL34	13 kDa		0	0	0	0	2	0
503	V-type proton ATPase subunit C OS=Plasmodium falciparum (isolate 3D7) OX=36329 GN=PF3D7_0106100 PE=3 SV=1	Q8I280	PF3D7_0106100	45 kDa		0	0	2	0	0	0
504	Adenylate kinase OS=Plasmodium falciparum (isolate 3D7) OX=36329 GN=PF3D7_1008900 PE=3 SV=1	Q8IJV6	PF3D7_1008900	28 kDa		0	0	0	2	2	0
154	Phosphotransferase OS=Plasmodium falciparum (isolate 3D7) OX=36329 GN=PF3D7_0624000 PE=3 SV=1	C6KT76	PF3D7_0624000	55 kDa		0	0	0	3	1	0
96	SNF2 helicase, putative OS=Plasmodium falciparum (isolate 3D7) OX=36329 GN=PF3D7_0624600 PE=4 SV=1	C6KT82	PF3D7_0624600	316 kDa		0	0	0	0	0	0
505	Protein S100-A8 OS=Homo sapiens OX=9606 GN=S100A8 PE=1 SV=1	P05109	S100A8	11 kDa		0	0	0	0	0	2
506	60S ribosomal protein L24 OS=Homo sapiens OX=9606 GN=RPL24 PE=1 SV=1	P83731	RPL24	18 kDa		0	0	0	0	2	2
507	Histone H2B type 1-M OS=Homo sapiens OX=9606 GN=H2BC14 PE=1 SV=3	Q99879	H2BC14	14 kDa		0	0	0	0	3	0
508	F-box only protein 50 OS=Homo sapiens OX=9606 GN=NCCRP1 PE=1 SV=1	Q6ZVX7	NCCRP1	31 kDa		0	0	0	0	3	0
509	Non-SERCA-type Ca2+ -transporting P-ATPase OS=Plasmodium falciparum (isolate 3D7) OX=36329 GN=PF3D7_1211900 PE=4 SV=1	A0A143ZZK9	PF3D7_1211900	140 kDa		0	0	0	0	0	0
52	Hemolysin III OS=Plasmodium falciparum (isolate 3D7) OX=36329 GN=PF3D7_1455400 PE=4 SV=2	Q8IKS4	PF3D7_1455400	33 kDa		0	0	0	0	0	0
510	Pyridoxal 5'-phosphate synthase subunit Pdx1 OS=Plasmodium falciparum (isolate 3D7) OX=36329 GN=pdx1 PE=1 SV=1	C6KT50	pdx1	33 kDa		0	0	0	2	0	0
157	Protein phosphatase PPM1, putative OS=Plasmodium falciparum (isolate 3D7) OX=36329 GN=PF3D7_0410300 PE=4 SV=2	Q9U0I5	PF3D7_0410300	105 kDa		0	0	0	0	0	0
511	Alkaline phosphatase, putative OS=Plasmodium falciparum (isolate 3D7) OX=36329 GN=PF3D7_0912400 PE=4 SV=1	Q8I328	PF3D7_0912400	53 kDa		0	0	0	0	0	0
512	Translation initiation factor eIF-2B subunit delta, putative OS=Plasmodium falciparum (isolate 3D7) OX=36329 GN=PF3D7_1013900 PE=3 SV=1	Q8IJQ6	PF3D7_1013900	125 kDa		0	0	0	0	0	0
513	Uncharacterized protein PF13_0277 OS=Plasmodium falciparum (isolate 3D7) OX=36329 GN=PF13_0277 PE=3 SV=1	Q8IDG7	PF13_0277	248 kDa		0	0	0	0	0	0
160	Uncharacterized protein OS=Plasmodium falciparum (isolate 3D7) OX=36329 GN=PF3D7_1458300 PE=4 SV=2	Q8IKP8	PF3D7_1458300	184 kDa		0	0	0	0	0	0
514	DnaJ protein, putative OS=Plasmodium falciparum (isolate 3D7) OX=36329 GN=PF3D7_0629200 PE=4 SV=1	C6KTC7	PF3D7_0629200	45 kDa		0	0	0	3	0	0
515	Nicotinate phosphoribosyltransferase OS=Plasmodium falciparum (isolate 3D7) OX=36329 GN=PF3D7_0629100 PE=3 SV=1	C6KTC6	PF3D7_0629100	77 kDa		0	0	0	0	0	0
516	Lysine--tRNA ligase OS=Plasmodium falciparum (isolate 3D7) OX=36329 GN=PF3D7_1350100 PE=1 SV=1	Q8IDJ8	PF3D7_1350100	68 kDa		0	0	0	0	0	0
517	Translation elongation factor EF-1, subunit alpha, putative OS=Plasmodium falciparum (isolate 3D7) OX=36329 GN=PF3D7_1123400 PE=4 SV=1	Q8IIC9	PF3D7_1123400	63 kDa		0	0	0	0	0	0
518	UBX domain-containing protein, putative OS=Plasmodium falciparum (isolate 3D7) OX=36329 GN=PF3D7_0934700 PE=4 SV=1	Q8I2H1	PF3D7_0934700	63 kDa		0	0	0	0	0	0
85	AP2 domain transcription factor OS=Plasmodium falciparum (isolate 3D7) OX=36329 GN=PF3D7_0604100 PE=1 SV=1	C6KSN9	PF3D7_0604100	230 kDa		0	1	2	1	0	0
519	Nucleoporin NUP116/NSP116, putative OS=Plasmodium falciparum (isolate 3D7) OX=36329 GN=PF3D7_1473700 PE=4 SV=1	Q8IKA0	PF3D7_1473700	142 kDa		0	0	0	2	0	0
520	H(+)-exporting diphosphatase OS=Plasmodium falciparum (isolate 3D7) OX=36329 GN=PF3D7_1456800 PE=3 SV=1	Q8IKR1	PF3D7_1456800	76 kDa		0	0	1	3	0	0
521	MA3 domain-containing protein, putative OS=Plasmodium falciparum (isolate 3D7) OX=36329 GN=PF3D7_1457300 PE=3 SV=1	Q8IKQ7	PF3D7_1457300	76 kDa		0	0	0	1	0	0
522	Coatomer subunit beta, putative OS=Plasmodium falciparum (isolate 3D7) OX=36329 GN=PF3D7_1429800 PE=4 SV=2	Q8ILG6	PF3D7_1429800	160 kDa		0	0	0	1	0	0
523	Inner membrane complex sub-compartment protein 3 OS=Plasmodium falciparum (isolate 3D7) OX=36329 GN=PF3D7_1460600 PE=4 SV=1	Q8IKM6	PF3D7_1460600	17 kDa		0	0	0	1	0	0
524	3-oxo-5-alpha-steroid 4-dehydrogenase, putative OS=Plasmodium falciparum (isolate 3D7) OX=36329 GN=PF3D7_1135900 PE=3 SV=2	Q8II05	PF3D7_1135900	35 kDa		0	0	0	2	0	0
525	Uncharacterized protein MAL13P1.336 OS=Plasmodium falciparum (isolate 3D7) OX=36329 GN=MAL13P1.336 PE=1 SV=1	Q8ID39	MAL13P1	79 kDa		0	2	2	0	0	0
526	FAU ubiquitin-like and ribosomal protein S30 OS=Homo sapiens OX=9606 GN=FAU PE=1 SV=2	P62861	FAU	14 kDa		0	0	0	0	3	0
527	U6 snRNA-associated Sm-like protein LSm3 OS=Plasmodium falciparum (isolate 3D7) OX=36329 GN=LSM3 PE=3 SV=1	C0H4W2	LSM3	11 kDa		0	0	1	0	0	0
528	RWD domain-containing protein, putative OS=Plasmodium falciparum (isolate 3D7) OX=36329 GN=PF3D7_0823100 PE=4 SV=1	C0H4X2	PF3D7_0823100	27 kDa		0	2	0	0	0	0
529	Thioredoxin OS=Plasmodium falciparum (isolate 3D7) OX=36329 GN=PF3D7_1457200 PE=3 SV=1	A0A144A4E0	PF3D7_1457200	12 kDa		0	0	0	3	1	0
530	DnaJ protein, putative OS=Plasmodium falciparum (isolate 3D7) OX=36329 GN=PF3D7_1413900 PE=4 SV=1	Q8ILV6	PF3D7_1413900	45 kDa		0	0	0	1	0	0
70	Uncharacterized protein OS=Plasmodium falciparum (isolate 3D7) OX=36329 GN=PF3D7_1447700 PE=4 SV=1	Q8IKZ8	PF3D7_1447700	41 kDa		0	0	0	0	0	0
531	Probable ATP-dependent 6-phosphofructokinase OS=Plasmodium falciparum (isolate 3D7) OX=36329 GN=PF3D7_0915400 PE=3 SV=1	Q8I2Z8	PF3D7_0915400	159 kDa		0	0	0	2	0	0
532	Major facilitator superfamily-related transporter, putative OS=Plasmodium falciparum (isolate 3D7) OX=36329 GN=PF3D7_0914700 PE=4 SV=1	Q8I305	PF3D7_0914700	58 kDa		0	0	0	0	0	0
533	DNA/RNA-binding protein Alba 2 OS=Plasmodium falciparum (isolate 3D7) OX=36329 GN=PF3D7_1346300 PE=4 SV=1	Q8IDN4	PF3D7_1346300	25 kDa		0	0	0	0	0	0
534	Pre-mRNA-splicing factor ATP-dependent RNA helicase PRP43, putative OS=Plasmodium falciparum (isolate 3D7) OX=36329 GN=PF3D7_0917600 PE=4 SV=1	Q8I2X7	PF3D7_0917600	94 kDa		0	0	0	0	0	0
535	Replication factor C subunit 2, putative OS=Plasmodium falciparum (isolate 3D7) OX=36329 GN=PF3D7_0218000 PE=3 SV=1	O96260	PF3D7_0218000	38 kDa		0	0	0	0	0	0
110	Uncharacterized protein OS=Plasmodium falciparum (isolate 3D7) OX=36329 GN=PF3D7_1419000 PE=4 SV=1	Q8ILR0	PF3D7_1419000	137 kDa		0	0	0	0	0	2
536	UDP-galactose transporter, putative OS=Plasmodium falciparum (isolate 3D7) OX=36329 GN=PF3D7_1113300 PE=4 SV=1	Q8IIM9	PF3D7_1113300	39 kDa		0	0	0	0	0	0
537	Guanine nucleotide-exchange factor SEC12 OS=Plasmodium falciparum (isolate 3D7) OX=36329 GN=PF3D7_1116400 PE=4 SV=1	Q8IIK2	PF3D7_1116400	57 kDa		0	0	0	0	0	0
538	Serine/threonine protein kinase OS=Plasmodium falciparum (isolate 3D7) OX=36329 GN=PF3D7_0302100 PE=4 SV=1	O77306	PF3D7_0302100	157 kDa		0	0	0	0	0	0
164	Dolichyl-diphosphooligosaccharide--protein glycosyltransferase subunit 1 OS=Plasmodium falciparum (isolate 3D7) OX=36329 GN=PF3D7_0311600 PE=3 SV=2	O77351	PF3D7_0311600	84 kDa		0	0	0	0	0	0
539	Acetyl-CoA synthetase, putative OS=Plasmodium falciparum (isolate 3D7) OX=36329 GN=PF3D7_0627800 PE=3 SV=1	C6KTB4	PF3D7_0627800	114 kDa		0	0	0	0	0	0
540	Elongator complex protein 3, putative OS=Plasmodium falciparum (isolate 3D7) OX=36329 GN=PF3D7_1227800 PE=4 SV=1	Q8I5E0	PF3D7_1227800	129 kDa		0	0	0	0	0	0
541	DNA primase OS=Plasmodium falciparum (isolate 3D7) OX=36329 GN=PF3D7_1438700 PE=3 SV=1	A0A144A659	PF3D7_1438700	53 kDa		0	0	0	0	0	0
542	Uncharacterized protein OS=Plasmodium falciparum (isolate 3D7) OX=36329 GN=PF3D7_1249100 PE=4 SV=1	Q8I4U3	PF3D7_1249100	45 kDa		0	0	0	0	0	0
543	Eukaryotic translation initiation factor 5, putative OS=Plasmodium falciparum (isolate 3D7) OX=36329 GN=PF3D7_1206700 PE=3 SV=1	Q8I5X8	PF3D7_1206700	65 kDa		0	0	0	0	0	0
544	Purine nucleoside phosphorylase OS=Homo sapiens OX=9606 GN=PNP PE=1 SV=2	P00491	PNP	32 kDa		0	0	0	0	2	0
545	Replication factor C subunit 5, putative OS=Plasmodium falciparum (isolate 3D7) OX=36329 GN=PF3D7_1111100 PE=4 SV=1	Q8IIQ1	PF3D7_1111100	40 kDa		0	0	0	0	0	0
546	1-acyl-sn-glycerol-3-phosphate acyltransferase, putative OS=Plasmodium falciparum (isolate 3D7) OX=36329 GN=PF3D7_1444300 PE=4 SV=2	Q8IL28	PF3D7_1444300	34 kDa		0	0	0	0	0	0
547	GPI ethanolamine phosphate transferase 3, putative OS=Plasmodium falciparum (isolate 3D7) OX=36329 GN=PF3D7_1214100 PE=4 SV=2	Q8I5R4	PF3D7_1214100	165 kDa		0	0	0	0	0	0
548	Methyltransferase, putative OS=Plasmodium falciparum (isolate 3D7) OX=36329 GN=PF3D7_1455200.1 PE=4 SV=1	A0A144A2R4	PF3D7_1455200	24 kDa		0	0	0	0	0	0
549	Syntaxin, Qa-SNARE family OS=Plasmodium falciparum (isolate 3D7) OX=36329 GN=PF3D7_1210100 PE=4 SV=1	Q8I5U8	PF3D7_1210100	37 kDa		0	0	0	0	0	0
550	MORN repeat-containing protein 1 OS=Plasmodium falciparum (isolate 3D7) OX=36329 GN=PF3D7_1031200 PE=4 SV=2	Q8IJ93	PF3D7_1031200	41 kDa		0	0	0	0	2	1
551	Proteasome subunit alpha type OS=Plasmodium falciparum (isolate 3D7) OX=36329 GN=PF3D7_0727400 PE=1 SV=1	Q8IBI3	PF3D7_0727400	28 kDa		0	0	0	0	0	0
552	CDP-diacylglycerol--inositol 3-phosphatidyltransferase OS=Plasmodium falciparum (isolate 3D7) OX=36329 GN=PF3D7_1315600 PE=3 SV=1	C0H5B7	PF3D7_1315600	24 kDa		0	0	0	0	0	0
553	Proteasome subunit alpha type-6, putative OS=Plasmodium falciparum (isolate 3D7) OX=36329 GN=PF3D7_0807500 PE=1 SV=2	Q8IAR3	PF3D7_0807500	30 kDa		0	0	0	2	0	0
86	Phosphoinositide-binding protein, putative OS=Plasmodium falciparum (isolate 3D7) OX=36329 GN=PF3D7_0704400 PE=4 SV=1	Q8IC26	PF3D7_0704400	119 kDa		0	0	0	0	0	0
159	Replication factor C subunit 1 OS=Plasmodium falciparum (isolate 3D7) OX=36329 GN=PF3D7_0219600 PE=3 SV=1	O96271	PF3D7_0219600	104 kDa		0	0	0	0	0	0
149	DNA-directed RNA polymerase subunit beta OS=Plasmodium falciparum (isolate 3D7) OX=36329 GN=PF3D7_0215700 PE=3 SV=3	O96236	PF3D7_0215700	152 kDa		0	0	0	0	0	0
554	Ubiquitin carboxyl-terminal hydrolase OS=Plasmodium falciparum (isolate 3D7) OX=36329 GN=PF3D7_0413900 PE=3 SV=1	Q8I1U8	PF3D7_0413900	98 kDa		0	0	0	0	0	0
555	AAA family ATPase, putative OS=Plasmodium falciparum (isolate 3D7) OX=36329 GN=PF3D7_0707400 PE=4 SV=1	C0H4M1	PF3D7_0707400	78 kDa		0	0	0	0	0	0
556	Copper-transporting ATPase OS=Plasmodium falciparum (isolate 3D7) OX=36329 GN=PF3D7_0904900 PE=4 SV=2	Q8I3A0	PF3D7_0904900	299 kDa		0	0	0	0	0	0
101	DNA mismatch repair protein OS=Plasmodium falciparum (isolate 3D7) OX=36329 GN=PF3D7_0505500 PE=3 SV=1	Q8I447	PF3D7_0505500	156 kDa		0	0	0	0	0	0
557	Transmembrane emp24 domain-containing protein, putative OS=Plasmodium falciparum (isolate 3D7) OX=36329 GN=PF3D7_1333300 PE=3 SV=1	Q8IDZ5	PF3D7_1333300	25 kDa		0	0	0	0	0	0
93	Oxidoreductase, short-chain dehydrogenase family, putative OS=Plasmodium falciparum (isolate 3D7) OX=36329 GN=PF3D7_0626100 PE=4 SV=1	C6KT97	PF3D7_0626100	45 kDa		0	0	0	0	0	0
158	GTPase-activating protein, putative OS=Plasmodium falciparum (isolate 3D7) OX=36329 GN=PF3D7_0904000 PE=4 SV=1	Q8I3A9	PF3D7_0904000	50 kDa		0	0	0	0	0	0
162	Calcium-dependent protein kinase 1 OS=Plasmodium falciparum (isolate 3D7) OX=36329 GN=PF3D7_0217500 PE=4 SV=1	A0A143ZWW4	PF3D7_0217500	61 kDa		0	0	0	0	0	0
558	RNA-binding protein musashi, putative OS=Plasmodium falciparum (isolate 3D7) OX=36329 GN=PF3D7_0916700 PE=4 SV=1	Q8I2Y5	PF3D7_0916700	45 kDa		0	0	0	0	0	0
559	DNA repair protein RAD51 homolog OS=Plasmodium falciparum (isolate 3D7) OX=36329 GN=PF3D7_1107400 PE=3 SV=2	Q8IIS8	PF3D7_1107400	39 kDa		0	0	0	0	0	0
560	Inosine-5'-monophosphate dehydrogenase OS=Plasmodium falciparum (isolate 3D7) OX=36329 GN=PF3D7_0920800 PE=3 SV=1	Q8I2U5	PF3D7_0920800	56 kDa		0	0	0	0	0	0
561	Uncharacterized protein OS=Plasmodium falciparum (isolate 3D7) OX=36329 GN=PF3D7_1216400 PE=4 SV=2	Q8I5P3	PF3D7_1216400	109 kDa		0	0	0	0	0	0
562	26S proteasome regulatory subunit RPN12, putative OS=Plasmodium falciparum (isolate 3D7) OX=36329 GN=PF3D7_0312300 PE=4 SV=1	O77345	PF3D7_0312300	35 kDa		0	0	0	0	0	0
563	NTF2 domain-containing protein OS=Plasmodium falciparum (isolate 3D7) OX=36329 GN=PF3D7_1423700 PE=4 SV=1	Q8ILL5	PF3D7_1423700	184 kDa		0	0	0	0	0	0
564	Cytosolic Fe-S cluster assembly factor NBP35, putative OS=Plasmodium falciparum (isolate 3D7) OX=36329 GN=PF3D7_0910800 PE=3 SV=1	Q8I344	PF3D7_0910800	51 kDa		0	0	0	0	0	0
565	Diacylglycerol kinase OS=Plasmodium falciparum (isolate 3D7) OX=36329 GN=PF3D7_1471400 PE=3 SV=2	Q8IKC5	PF3D7_1471400	58 kDa		0	0	0	0	0	0
95	Phosphatidylinositol transfer protein, putative OS=Plasmodium falciparum (isolate 3D7) OX=36329 GN=PF3D7_1351000 PE=4 SV=2	Q8IDI9	PF3D7_1351000	221 kDa		0	0	0	0	0	0
79	Prolyl-tRNA synthetase OS=Plasmodium falciparum (isolate 3D7) OX=36329 GN=PF3D7_1213800 PE=3 SV=1	A0A144A0G8	PF3D7_1213800	87 kDa		0	0	2	0	0	0
566	Uncharacterized protein OS=Plasmodium falciparum (isolate 3D7) OX=36329 GN=PF3D7_1444900 PE=4 SV=1	Q8IL24	PF3D7_1444900	21 kDa	TRUE	0	0	0	0	0	0
567	cAMP-dependent protein kinase catalytic subunit OS=Plasmodium falciparum (isolate 3D7) OX=36329 GN=PF3D7_0934800 PE=3 SV=1	Q7K6A0	PF3D7_0934800	40 kDa		0	0	0	0	2	0
568	Structural maintenance of chromosomes protein 3 homolog OS=Plasmodium falciparum (isolate 3D7) OX=36329 GN=PFD0685c PE=1 SV=1	Q8I1U7	PFD0685c	141 kDa		0	0	0	0	0	0
569	Histone deacetylase, putative OS=Plasmodium falciparum (isolate 3D7) OX=36329 GN=PF3D7_1472200 PE=4 SV=1	A0A144A4T0	PF3D7_1472200	269 kDa		0	0	0	0	0	0
570	DNA mismatch repair protein MSH2, putative OS=Plasmodium falciparum (isolate 3D7) OX=36329 GN=PF3D7_1427500 PE=4 SV=1	Q8ILI9	PF3D7_1427500	95 kDa		0	0	0	0	0	0
571	Uncharacterized protein OS=Plasmodium falciparum (isolate 3D7) OX=36329 GN=PF3D7_0706500 PE=4 SV=1	C0H4L6	PF3D7_0706500	197 kDa		0	0	0	0	0	0
572	Uncharacterized protein OS=Plasmodium falciparum (isolate 3D7) OX=36329 GN=PF3D7_1469100 PE=3 SV=1	Q8IKE6	PF3D7_1469100	31 kDa		0	0	0	0	0	0
573	Triose phosphate transporter OS=Plasmodium falciparum (isolate 3D7) OX=36329 GN=PF3D7_0508300 PE=4 SV=1	Q8I420	PF3D7_0508300	39 kDa		0	0	0	0	0	0
574	Ankyrin-repeat protein, putative OS=Plasmodium falciparum (isolate 3D7) OX=36329 GN=PF3D7_1313900 PE=4 SV=1	C0H5B4	PF3D7_1313900	47 kDa		0	0	0	0	0	0
575	U6 snRNA-associated Sm-like protein LSm4 OS=Plasmodium falciparum (isolate 3D7) OX=36329 GN=LSM4 PE=3 SV=2	Q8IIT3	LSM4	14 kDa		0	0	0	0	0	0
576	Uncharacterized protein OS=Plasmodium falciparum (isolate 3D7) OX=36329 GN=PF3D7_1409400 PE=4 SV=2	Q8IM01	PF3D7_1409400	31 kDa		0	0	0	0	0	0
577	N-acetyltransferase, GNAT family, putative OS=Plasmodium falciparum (isolate 3D7) OX=36329 GN=PF3D7_1437000 PE=4 SV=2	Q8IL96	PF3D7_1437000	64 kDa		0	0	0	0	0	0
578	Mitochondrial import receptor subunit TOM40, putative OS=Plasmodium falciparum (isolate 3D7) OX=36329 GN=PF3D7_0617000 PE=3 SV=1	C6KT11	PF3D7_0617000	44 kDa		0	0	0	0	0	0
579	Proteasome subunit alpha type-1, putative OS=Plasmodium falciparum (isolate 3D7) OX=36329 GN=PF3D7_1474800 PE=1 SV=1	Q8IK90	PF3D7_1474800	29 kDa		0	0	0	0	0	0
580	Galectin-3 OS=Homo sapiens OX=9606 GN=LGALS3 PE=1 SV=5	P17931	LGALS3	26 kDa		0	0	0	0	2	0
END OF FILE

## Sheet: Pfalciparum only
	Human proteins filtered out
Accession	Description	3D7_1	3D7_2	177_1	177_2	Mev_1	Mev_2
C6KSX8	Uncharacterized protein OS=Plasmodium falciparum (isolate 3D7) OX=36329 GN=PF3D7_0613600 PE=4 SV=1	0	0	398	498	286	276
Q8IB24	Heat shock protein 70 OS=Plasmodium falciparum (isolate 3D7) OX=36329 GN=PF3D7_0818900 PE=3 SV=1	1	23	124	141	123	98
Q8I3B0	60S ribosomal protein L32 OS=Plasmodium falciparum (isolate 3D7) OX=36329 GN=PF3D7_0903900 PE=1 SV=1	4	146	154	151	38	51
Q8IDR9	40S ribosomal protein S6 OS=Plasmodium falciparum (isolate 3D7) OX=36329 GN=PF3D7_1342000 PE=1 SV=1	2	86	103	93	99	95
Q8I0P6	Elongation factor 1-alpha OS=Plasmodium falciparum (isolate 3D7) OX=36329 GN=PF3D7_1357000 PE=3 SV=1	3	13	85	92	42	49
C6KT23	60S ribosomal protein L27a, putative OS=Plasmodium falciparum (isolate 3D7) OX=36329 GN=PF3D7_0618300 PE=1 SV=1	3	135	85	117	64	52
Q8IAX6	60S ribosomal protein L13 OS=Plasmodium falciparum (isolate 3D7) OX=36329 GN=PF3D7_0814000 PE=1 SV=1	8	71	107	117	48	58
C6KTA4	Pyruvate kinase OS=Plasmodium falciparum (isolate 3D7) OX=36329 GN=PF3D7_0626800 PE=1 SV=1	1	41	148	179	24	63
Q8IJ32	Dynamin-like protein OS=Plasmodium falciparum (isolate 3D7) OX=36329 GN=PF3D7_1037500 PE=4 SV=1	0	0	33	50	141	99
Q8IIB4	60S ribosomal protein L35, putative OS=Plasmodium falciparum (isolate 3D7) OX=36329 GN=PF3D7_1124900 PE=1 SV=2	1	75	91	44	32	29
Q8IC05	Heat shock protein 90 OS=Plasmodium falciparum (isolate 3D7) OX=36329 GN=PF3D7_0708400 PE=1 SV=1	0	5	41	88	27	27
O77364	60S ribosomal protein L26, putative OS=Plasmodium falciparum (isolate 3D7) OX=36329 GN=PF3D7_0312800 PE=1 SV=1	4	93	85	107	25	33
Q8I431	60S ribosomal protein L4 OS=Plasmodium falciparum (isolate 3D7) OX=36329 GN=PF3D7_0507100 PE=1 SV=1	4	64	77	89	45	62
Q8II62	60S ribosomal protein L38 OS=Plasmodium falciparum (isolate 3D7) OX=36329 GN=PF3D7_1130100 PE=1 SV=1	0	49	35	80	58	54
Q8I2X4	Heat shock protein 70 OS=Plasmodium falciparum (isolate 3D7) OX=36329 GN=PF3D7_0917900 PE=3 SV=1	0	5	73	90	29	34
Q8IM10	40S ribosomal protein S8 OS=Plasmodium falciparum (isolate 3D7) OX=36329 GN=PF3D7_1408600 PE=1 SV=1	0	93	84	68	80	39
A0A143ZYX3	60S ribosomal protein L37ae, putative OS=Plasmodium falciparum (isolate 3D7) OX=36329 GN=PF3D7_0210100.1 PE=3 SV=1	2	94	84	69	21	15
Q8IEM3	60S ribosomal protein L24, putative OS=Plasmodium falciparum (isolate 3D7) OX=36329 GN=PF3D7_1309100 PE=1 SV=1	3	94	76	91	22	24
O96258	40S ribosomal protein S26 OS=Plasmodium falciparum (isolate 3D7) OX=36329 GN=PF3D7_0217800 PE=1 SV=1	7	66	45	70	17	11
Q8I713	60S ribosomal protein L36 OS=Plasmodium falciparum (isolate 3D7) OX=36329 GN=PF3D7_1109900 PE=1 SV=2	6	41	48	38	63	41
Q8ILK3	60S ribosomal protein L21 OS=Plasmodium falciparum (isolate 3D7) OX=36329 GN=PF3D7_1426000 PE=1 SV=1	2	84	66	59	26	25
Q8IJC6	60S ribosomal protein L3 OS=Plasmodium falciparum (isolate 3D7) OX=36329 GN=PF3D7_1027800 PE=1 SV=1	1	29	37	74	19	33
C0H5G3	60S ribosomal protein L18-2, putative OS=Plasmodium falciparum (isolate 3D7) OX=36329 GN=PF3D7_1341300 PE=1 SV=1	0	24	37	46	64	31
Q8IDB0	40S ribosomal protein S15 OS=Plasmodium falciparum (isolate 3D7) OX=36329 GN=PF3D7_1358800 PE=1 SV=1	1	30	52	31	36	49
Q8ILL3	60S ribosomal protein L5, putative OS=Plasmodium falciparum (isolate 3D7) OX=36329 GN=PF3D7_1424100 PE=1 SV=1	0	23	39	55	54	39
C0H4L5	Ribosomal protein L37 OS=Plasmodium falciparum (isolate 3D7) OX=36329 GN=PF3D7_0706400 PE=1 SV=1	7	10	22	18	6	3
C0H4K8	40S ribosomal protein S29, putative OS=Plasmodium falciparum (isolate 3D7) OX=36329 GN=PF3D7_0705700 PE=1 SV=1	0	66	48	49	10	14
Q8IE82	60S ribosomal protein L23 OS=Plasmodium falciparum (isolate 3D7) OX=36329 GN=PF3D7_1323400 PE=1 SV=1	2	39	22	34	29	53
Q8I3R6	40S ribosomal protein S24 OS=Plasmodium falciparum (isolate 3D7) OX=36329 GN=PF3D7_0519400 PE=1 SV=1	1	16	28	24	35	49
C0H4F1	FoP domain-containing protein, putative OS=Plasmodium falciparum (isolate 3D7) OX=36329 GN=PF3D7_0519700 PE=4 SV=1	4	21	55	30	21	26
Q8I3T9	60S ribosomal protein L2 OS=Plasmodium falciparum (isolate 3D7) OX=36329 GN=PF3D7_0516900 PE=1 SV=1	0	33	58	42	16	19
O96191	Uncharacterized protein OS=Plasmodium falciparum (isolate 3D7) OX=36329 GN=PF3D7_0210900 PE=4 SV=1	0	38	26	22	26	15
K7NTP5	Heat shock protein 70 OS=Plasmodium falciparum (isolate 3D7) OX=36329 GN=PF3D7_0831700 PE=1 SV=1	0	8	37	42	33	0
Q7KQK6	GTP-binding nuclear protein OS=Plasmodium falciparum (isolate 3D7) OX=36329 GN=PF3D7_1117700 PE=3 SV=1	0	1	42	43	23	18
O97248	40S ribosomal protein S23, putative OS=Plasmodium falciparum (isolate 3D7) OX=36329 GN=PF3D7_0306900 PE=1 SV=1	0	25	27	14	26	15
Q8IKK7	Glyceraldehyde-3-phosphate dehydrogenase OS=Plasmodium falciparum (isolate 3D7) OX=36329 GN=PF3D7_1462800 PE=3 SV=1	0	4	26	56	27	29
A0A144A1R5	Actin I OS=Plasmodium falciparum (isolate 3D7) OX=36329 GN=PF3D7_1246200 PE=3 SV=1	0	0	26	38	21	28
Q8IIV2	Histone H4 OS=Plasmodium falciparum (isolate 3D7) OX=36329 GN=PF3D7_1105000 PE=3 SV=1	0	9	20	26	22	19
P27362	Phosphoglycerate kinase OS=Plasmodium falciparum (isolate 3D7) OX=36329 GN=PGK PE=1 SV=1	0	2	14	21	21	12
Q8IIV1	Histone H2B OS=Plasmodium falciparum (isolate 3D7) OX=36329 GN=PF3D7_1105100 PE=3 SV=1	0	9	18	22	33	37
Q8IKF0	Eukaryotic initiation factor 4A OS=Plasmodium falciparum (isolate 3D7) OX=36329 GN=PF3D7_1468700 PE=3 SV=1	0	0	19	33	9	17
Q8IIU8	40S ribosomal protein S4 OS=Plasmodium falciparum (isolate 3D7) OX=36329 GN=PF3D7_1105400 PE=1 SV=2	0	6	37	28	13	23
Q8IAX5	40S ribosomal protein S16, putative OS=Plasmodium falciparum (isolate 3D7) OX=36329 GN=PF3D7_0813900 PE=1 SV=1	1	28	20	28	9	30
C6S3J6	60S ribosomal protein L29 OS=Plasmodium falciparum (isolate 3D7) OX=36329 GN=PF3D7_1460300 PE=1 SV=1	0	56	12	21	8	12
Q8IAX8	DNA/RNA-binding protein Alba 1 OS=Plasmodium falciparum (isolate 3D7) OX=36329 GN=PF3D7_0814200 PE=4 SV=1	2	15	15	17	19	20
Q8IKH8	40S ribosomal protein S3 OS=Plasmodium falciparum (isolate 3D7) OX=36329 GN=PF3D7_1465900 PE=1 SV=1	0	2	34	27	11	7
C0H4A6	Ribosomal protein L15 OS=Plasmodium falciparum (isolate 3D7) OX=36329 GN=PF3D7_0415900 PE=1 SV=1	0	10	14	41	23	16
Q8I0V4	Endoplasmin, putative OS=Plasmodium falciparum (isolate 3D7) OX=36329 GN=PF3D7_1222300 PE=1 SV=1	0	0	33	33	17	11
Q8ILL2	60S ribosomal protein L7a OS=Plasmodium falciparum (isolate 3D7) OX=36329 GN=PF3D7_1424400 PE=1 SV=2	0	15	18	13	14	18
Q7K6A4	S-adenosylmethionine synthase OS=Plasmodium falciparum (isolate 3D7) OX=36329 GN=PF3D7_0922200 PE=3 SV=1	0	1	12	24	11	11
Q6LFH8	Ornithine aminotransferase OS=Plasmodium falciparum (isolate 3D7) OX=36329 GN=OAT PE=1 SV=1	0	4	5	10	10	9
Q8IKM5	60S ribosomal protein L27 OS=Plasmodium falciparum (isolate 3D7) OX=36329 GN=PF3D7_1460700 PE=1 SV=2	0	5	16	23	9	23
Q8IDQ9	Phosphoethanolamine N-methyltransferase OS=Plasmodium falciparum (isolate 3D7) OX=36329 GN=PF3D7_1343000 PE=4 SV=1	0	2	12	20	16	8
Q8IKW5	Elongation factor 2 OS=Plasmodium falciparum (isolate 3D7) OX=36329 GN=PF3D7_1451100 PE=3 SV=1	0	2	19	14	11	12
Q8IBY4	60S ribosomal protein L34 OS=Plasmodium falciparum (isolate 3D7) OX=36329 GN=PF3D7_0710600 PE=1 SV=1	2	21	22	18	5	8
Q8ID50	Ubiquitin OS=Plasmodium falciparum (isolate 3D7) OX=36329 GN=PF3D7_1365900 PE=1 SV=1	0	6	8	16	8	9
C6KSV0	Histone H3 OS=Plasmodium falciparum (isolate 3D7) OX=36329 GN=PF3D7_0610400 PE=3 SV=1	0	22	14	10	8	9
C6KSY6	60S ribosomal protein L19 OS=Plasmodium falciparum (isolate 3D7) OX=36329 GN=PF3D7_0614500 PE=1 SV=1	0	8	26	15	4	5
O97231	60S ribosomal protein L44 OS=Plasmodium falciparum (isolate 3D7) OX=36329 GN=RPL44 PE=1 SV=3	0	31	12	6	7	6
O77381	40S ribosomal protein S11, putative OS=Plasmodium falciparum (isolate 3D7) OX=36329 GN=PF3D7_0317600 PE=1 SV=2	0	2	23	18	8	5
Q8IC01	Heat shock protein 110 OS=Plasmodium falciparum (isolate 3D7) OX=36329 GN=PF3D7_0708800 PE=4 SV=1	0	0	12	19	26	22
Q8I463	60S ribosomal protein L31 OS=Plasmodium falciparum (isolate 3D7) OX=36329 GN=PF3D7_0503800 PE=1 SV=1	0	13	8	23	9	18
Q8IDI5	60S ribosomal protein L17, putative OS=Plasmodium falciparum (isolate 3D7) OX=36329 GN=PF3D7_1351400 PE=1 SV=1	0	12	16	19	6	5
A0A144A0U2	40S ribosomal protein S30 OS=Plasmodium falciparum (isolate 3D7) OX=36329 GN=PF3D7_0219200 PE=3 SV=1	0	5	0	0	8	0
C0H4V6	14-3-3 protein OS=Plasmodium falciparum (isolate 3D7) OX=36329 GN=PF3D7_0818200 PE=3 SV=1	1	3	15	20	12	8
C0H571	High molecular weight rhoptry protein 2 OS=Plasmodium falciparum (isolate 3D7) OX=36329 GN=PF3D7_0929400 PE=4 SV=1	0	0	4	11	11	10
Q9U0K8	Protein CINCH OS=Plasmodium falciparum (isolate 3D7) OX=36329 GN=PF3D7_0407800 PE=4 SV=1	0	0	1	2	37	23
Q8IHU0	60S ribosomal protein L28 OS=Plasmodium falciparum (isolate 3D7) OX=36329 GN=PF3D7_1142500 PE=1 SV=1	0	9	11	14	8	17
Q8IJX8	DNA/RNA-binding protein Alba 3 OS=Plasmodium falciparum (isolate 3D7) OX=36329 GN=PF3D7_1006200 PE=4 SV=1	3	10	12	14	12	8
A0A143ZZ61	Phosphopyruvate hydratase OS=Plasmodium falciparum (isolate 3D7) OX=36329 GN=PF3D7_1015900 PE=3 SV=1	0	4	7	23	17	11
Q8ILX3	Mini-chromosome maintenance complex-binding protein, putative OS=Plasmodium falciparum (isolate 3D7) OX=36329 GN=PF3D7_1412100 PE=4 SV=1	0	0	18	21	7	8
Q8IBA0	Receptor for activated c kinase OS=Plasmodium falciparum (isolate 3D7) OX=36329 GN=PF3D7_0826700 PE=4 SV=1	0	0	9	13	9	5
Q9TY94	ATP-dependent RNA helicase UAP56 OS=Plasmodium falciparum (isolate 3D7) OX=36329 GN=PF3D7_0209800 PE=4 SV=1	0	0	7	11	0	3
O97313	40S ribosomal protein S3a OS=Plasmodium falciparum (isolate 3D7) OX=36329 GN=MAL3P7.35 PE=1 SV=1	0	1	4	3	9	10
Q8IBQ6	60S ribosomal protein L11a, putative OS=Plasmodium falciparum (isolate 3D7) OX=36329 GN=PF3D7_0719600 PE=1 SV=1	0	1	10	22	7	5
Q8I5A9	Ras-related protein Rab-2 OS=Plasmodium falciparum (isolate 3D7) OX=36329 GN=PF3D7_1231100 PE=4 SV=1	0	0	1	7	5	3
Q8I3R0	40S ribosomal protein S9, putative OS=Plasmodium falciparum (isolate 3D7) OX=36329 GN=PF3D7_0520000 PE=1 SV=1	0	1	4	10	11	15
C0H5C2	40S ribosomal protein S19 OS=Plasmodium falciparum (isolate 3D7) OX=36329 GN=PF3D7_1317800 PE=1 SV=1	0	5	10	12	6	17
Q8IL02	40S ribosomal protein S5 OS=Plasmodium falciparum (isolate 3D7) OX=36329 GN=PF3D7_1447000 PE=1 SV=1	0	1	3	7	4	9
Q8I5H4	Polyadenylate-binding protein OS=Plasmodium falciparum (isolate 3D7) OX=36329 GN=PF3D7_1224300 PE=3 SV=1	0	6	3	7	1	2
Q8ILN8	40S ribosomal protein S25 OS=Plasmodium falciparum (isolate 3D7) OX=36329 GN=PF3D7_1421200 PE=1 SV=2	1	11	8	8	6	1
A0A5K1K925	40S ribosomal protein S11 OS=Plasmodium falciparum (isolate 3D7) OX=36329 GN=PF3D7_0516200 PE=3 SV=1	0	6	10	12	5	6
A0A143ZWL7	Tubulin beta chain OS=Plasmodium falciparum (isolate 3D7) OX=36329 GN=PF3D7_1008700 PE=3 SV=1	0	2	6	7	6	4
Q8IFP2	40S ribosomal protein S19 OS=Plasmodium falciparum (isolate 3D7) OX=36329 GN=PF3D7_0422400 PE=1 SV=1	0	8	10	12	3	6
Q8IJZ7	60S ribosomal protein L13, putative OS=Plasmodium falciparum (isolate 3D7) OX=36329 GN=PF3D7_1004000 PE=1 SV=1	0	0	6	10	4	8
C6KSS4	Spindle assembly abnormal protein 6, putative OS=Plasmodium falciparum (isolate 3D7) OX=36329 GN=PF3D7_0607600 PE=4 SV=1	0	1	7	23	0	5
Q8IDS6	60S ribosomal protein L18a OS=Plasmodium falciparum (isolate 3D7) OX=36329 GN=PF3D7_1341200 PE=1 SV=1	0	1	8	10	6	8
Q8I502	40S ribosomal protein S17, putative OS=Plasmodium falciparum (isolate 3D7) OX=36329 GN=PF3D7_1242700 PE=1 SV=1	0	0	4	9	6	15
A0A5K1K988	Inner membrane complex protein 1f, putative OS=Plasmodium falciparum (isolate 3D7) OX=36329 GN=PF3D7_1351700 PE=4 SV=1	0	0	0	0	22	16
Q8IE09	60S ribosomal protein L23, putative OS=Plasmodium falciparum (isolate 3D7) OX=36329 GN=PF3D7_1331800 PE=1 SV=1	0	2	14	8	5	10
Q8IIA2	40S ribosomal protein S18, putative OS=Plasmodium falciparum (isolate 3D7) OX=36329 GN=PF3D7_1126200 PE=1 SV=1	0	14	6	8	9	7
Q8IM23	rRNA 2'-O-methyltransferase fibrillarin, putative OS=Plasmodium falciparum (isolate 3D7) OX=36329 GN=PF3D7_1407100 PE=3 SV=1	0	3	4	8	10	5
Q8IKL9	40S ribosomal protein S28e, putative OS=Plasmodium falciparum (isolate 3D7) OX=36329 GN=PF3D7_1461300 PE=1 SV=1	0	5	15	12	3	9
Q8II61	60S acidic ribosomal protein P0 OS=Plasmodium falciparum (isolate 3D7) OX=36329 GN=PF3D7_1130200 PE=3 SV=1	0	3	5	9	4	4
A0A5K1K8V8	60S ribosomal protein L6, putative OS=Plasmodium falciparum (isolate 3D7) OX=36329 GN=PF3D7_1338200 PE=3 SV=1	0	0	8	11	8	8
Q8IDK7	Glutamyl-tRNA synthetase OS=Plasmodium falciparum (isolate 3D7) OX=36329 GN=PF3D7_1349200 PE=3 SV=1	0	0	4	7	0	0
A0A5K1K8H7	Ras-related protein Rab-1B OS=Plasmodium falciparum (isolate 3D7) OX=36329 GN=PF3D7_0512600 PE=4 SV=1	0	0	0	5	4	5
O97320	Histone H2A OS=Plasmodium falciparum (isolate 3D7) OX=36329 GN=PF3D7_0320900 PE=3 SV=1	0	3	7	8	3	5
O97285	ATP-dependent RNA helicase DDX6 OS=Plasmodium falciparum (isolate 3D7) OX=36329 GN=PF3D7_0320800 PE=3 SV=1	0	0	4	3	4	2
A0A143ZY58	ADP-ribosylation factor OS=Plasmodium falciparum (isolate 3D7) OX=36329 GN=PF3D7_1020900 PE=3 SV=1	0	0	1	5	1	6
Q8I3W9	Ras-related protein Rab-1A OS=Plasmodium falciparum (isolate 3D7) OX=36329 GN=PF3D7_0513800 PE=4 SV=1	0	0	0	5	0	0
Q8IJ34	ADP/ATP transporter on adenylate translocase OS=Plasmodium falciparum (isolate 3D7) OX=36329 GN=PF3D7_1037300 PE=3 SV=1	0	0	5	9	2	2
Q8ILV2	60S ribosomal protein L10, putative OS=Plasmodium falciparum (isolate 3D7) OX=36329 GN=PF3D7_1414300 PE=1 SV=1	0	3	7	6	4	2
A0A5K1K8Y8	DNA/RNA-binding protein Alba 4 OS=Plasmodium falciparum (isolate 3D7) OX=36329 GN=PF3D7_1347500 PE=4 SV=1	0	0	3	8	5	5
A0A144A1B3	Protein SEY1 homolog OS=Plasmodium falciparum (isolate 3D7) OX=36329 GN=PF3D7_1416100 PE=3 SV=1	0	0	0	2	0	0
O97250	60S ribosomal protein L7, putative OS=Plasmodium falciparum (isolate 3D7) OX=36329 GN=PF3D7_0307200 PE=1 SV=2	2	4	3	2	9	5
Q76NM3	L-lactate dehydrogenase OS=Plasmodium falciparum (isolate 3D7) OX=36329 GN=PF3D7_1324900 PE=1 SV=1	0	4	6	9	11	5
C6KSR4	Uncharacterized protein OS=Plasmodium falciparum (isolate 3D7) OX=36329 GN=PF3D7_0606600 PE=4 SV=1	0	0	0	0	7	18
Q8IET7	40S ribosomal protein S7 OS=Plasmodium falciparum (isolate 3D7) OX=36329 GN=PF3D7_1302800 PE=1 SV=1	0	0	1	9	6	3
Q8IC35	Erythrocyte membrane-associated antigen OS=Plasmodium falciparum (isolate 3D7) OX=36329 GN=PF3D7_0703500 PE=3 SV=2	0	0	4	1	0	0
Q8I3T8	60S ribosomal protein L12, putative OS=Plasmodium falciparum (isolate 3D7) OX=36329 GN=PF3D7_0517000 PE=3 SV=2	0	1	6	11	3	3
Q8I5Y3	Eukaryotic translation initiation factor 3 subunit C OS=Plasmodium falciparum (isolate 3D7) OX=36329 GN=PF3D7_1206200 PE=3 SV=1	0	0	2	4	0	0
Q8IC16	DNA replication licensing factor MCM7 OS=Plasmodium falciparum (isolate 3D7) OX=36329 GN=MCM7 PE=3 SV=1	0	0	2	2	0	0
Q8IHT9	60S ribosomal protein L35ae, putative OS=Plasmodium falciparum (isolate 3D7) OX=36329 GN=PF3D7_1142600 PE=1 SV=1	0	0	1	7	4	1
O77395	40S ribosomal protein S15A, putative OS=Plasmodium falciparum (isolate 3D7) OX=36329 GN=PF3D7_0316800 PE=1 SV=1	0	1	5	6	3	3
Q8I3L4	Acyl-CoA synthetase OS=Plasmodium falciparum (isolate 3D7) OX=36329 GN=PF3D7_0525100 PE=4 SV=1	0	0	1	1	0	0
Q8IB44	Uncharacterized protein OS=Plasmodium falciparum (isolate 3D7) OX=36329 GN=PF3D7_0821000 PE=4 SV=1	0	0	1	3	0	1
Q6ZLZ9	Tubulin alpha chain OS=Plasmodium falciparum (isolate 3D7) OX=36329 GN=PF3D7_0903700 PE=3 SV=1	0	1	3	6	4	3
Q8IK89	Trailer hitch homolog, putative OS=Plasmodium falciparum (isolate 3D7) OX=36329 GN=PF3D7_1474900 PE=4 SV=1	0	3	12	7	1	1
Q8IEK3	26S protease regulatory subunit 7, putative OS=Plasmodium falciparum (isolate 3D7) OX=36329 GN=PF3D7_1311500 PE=3 SV=2	0	0	3	3	2	1
Q8IBN5	40S ribosomal protein S5, putative OS=Plasmodium falciparum (isolate 3D7) OX=36329 GN=PF3D7_0721600 PE=1 SV=1	0	0	7	11	3	1
Q8IES0	Small heat shock protein, putative OS=Plasmodium falciparum (isolate 3D7) OX=36329 GN=PF3D7_1304500 PE=3 SV=1	0	0	0	2	3	2
A0A144A3T1	Fructose-bisphosphate aldolase OS=Plasmodium falciparum (isolate 3D7) OX=36329 GN=PF3D7_1444800 PE=3 SV=1	0	1	5	7	9	3
Q8II24	Heat shock protein 70 OS=Plasmodium falciparum (isolate 3D7) OX=36329 GN=PF3D7_1134000 PE=3 SV=1	0	0	5	5	0	0
Q8IJK8	60S ribosomal protein L30e, putative OS=Plasmodium falciparum (isolate 3D7) OX=36329 GN=PF3D7_1019400 PE=1 SV=1	0	1	8	7	5	6
Q8IEQ1	26S protease regulatory subunit 10B, putative OS=Plasmodium falciparum (isolate 3D7) OX=36329 GN=PF3D7_1306400 PE=3 SV=1	0	0	2	6	1	1
Q8IIJ8	Heat shock protein 101 OS=Plasmodium falciparum (isolate 3D7) OX=36329 GN=PF3D7_1116800 PE=1 SV=1	0	0	0	0	0	0
Q8IB51	60S ribosomal protein L22, putative OS=Plasmodium falciparum (isolate 3D7) OX=36329 GN=PF3D7_0821700 PE=1 SV=1	0	0	3	3	4	6
O97282	T-complex protein 1 subunit epsilon OS=Plasmodium falciparum (isolate 3D7) OX=36329 GN=PF3D7_0320300 PE=3 SV=1	0	0	3	7	0	2
Q8I4U5	26S protease regulatory subunit 8, putative OS=Plasmodium falciparum (isolate 3D7) OX=36329 GN=PF3D7_1248900 PE=3 SV=1	0	0	3	3	0	0
Q8ILE8	60S ribosomal protein L14, putative OS=Plasmodium falciparum (isolate 3D7) OX=36329 GN=PF3D7_1431700 PE=1 SV=1	0	2	3	5	3	4
Q8IJS7	PRE-binding protein OS=Plasmodium falciparum (isolate 3D7) OX=36329 GN=PF3D7_1011800 PE=4 SV=1	0	4	1	4	2	0
C0H516	Ras-related protein RAB7 OS=Plasmodium falciparum (isolate 3D7) OX=36329 GN=PF3D7_0903200 PE=4 SV=1	0	0	0	2	0	2
Q8I3M5	Karyopherin beta OS=Plasmodium falciparum (isolate 3D7) OX=36329 GN=PF3D7_0524000 PE=4 SV=1	0	0	3	9	3	3
A0A5K1K967	Elongation factor 1-gamma, putative OS=Plasmodium falciparum (isolate 3D7) OX=36329 GN=PF3D7_1338300 PE=4 SV=1	0	0	3	1	1	2
Q8I1S0	Small GTP-binding protein sar1 OS=Plasmodium falciparum (isolate 3D7) OX=36329 GN=PF3D7_0416800 PE=3 SV=1	0	0	2	7	2	2
Q8IBM9	Obg-like ATPase 1 OS=Plasmodium falciparum (isolate 3D7) OX=36329 GN=PF3D7_0722400 PE=3 SV=1	0	0	0	1	0	0
Q8I3T1	Eukaryotic translation initiation factor 3 subunit B OS=Plasmodium falciparum (isolate 3D7) OX=36329 GN=PF3D7_0517700 PE=3 SV=1	0	0	1	1	0	0
A0A144A3N9	Actin II OS=Plasmodium falciparum (isolate 3D7) OX=36329 GN=PF3D7_1412500 PE=3 SV=1	0	0	2	3	0	1
Q8I306	Transcription elongation factor 1 homolog OS=Plasmodium falciparum (isolate 3D7) OX=36329 GN=PF3D7_0914600 PE=3 SV=1	0	4	0	1	8	6
Q8II43	CCT-alpha OS=Plasmodium falciparum (isolate 3D7) OX=36329 GN=PF3D7_1132200 PE=3 SV=1	0	0	4	6	0	0
C6KT34	Cell division cycle protein 48 homologue, putative OS=Plasmodium falciparum (isolate 3D7) OX=36329 GN=PF3D7_0619400 PE=4 SV=1	0	0	0	5	3	0
Q8IBT2	Eukaryotic translation initiation factor 3 subunit I OS=Plasmodium falciparum (isolate 3D7) OX=36329 GN=PF3D7_0716800 PE=3 SV=1	0	0	0	0	0	0
Q7KQK3	Heat shock protein DNAJ homologue Pfj4 OS=Plasmodium falciparum (isolate 3D7) OX=36329 GN=PF3D7_1211400 PE=4 SV=1	0	0	3	3	5	1
Q8ILR7	DNA replication licensing factor MCM2 OS=Plasmodium falciparum (isolate 3D7) OX=36329 GN=PF3D7_1417800 PE=3 SV=1	0	0	1	2	0	0
Q8I461	Cation transporting P-ATPase OS=Plasmodium falciparum (isolate 3D7) OX=36329 GN=PF3D7_0504000 PE=4 SV=1	0	0	0	0	0	0
Q76NN8	Calcium-transporting ATPase OS=Plasmodium falciparum (isolate 3D7) OX=36329 GN=PF3D7_0106300 PE=4 SV=1	0	0	0	4	0	0
Q8IE67	Phosphoribosylpyrophosphate synthetase OS=Plasmodium falciparum (isolate 3D7) OX=36329 GN=PF3D7_1325100 PE=3 SV=1	0	0	5	4	1	1
Q8IJW0	26S protease regulatory subunit 4, putative OS=Plasmodium falciparum (isolate 3D7) OX=36329 GN=PF3D7_1008400 PE=3 SV=2	0	0	2	3	2	1
Q7K6B0	Ras-related protein Rab-18 OS=Plasmodium falciparum (isolate 3D7) OX=36329 GN=PF3D7_0807300 PE=4 SV=1	0	0	0	4	1	3

## Sheet: proteins>4 peptides
	3D7 #01	3D7 #02	Anchor iKD #01	Anchor iKD #02	Anchor Mev iKD #01	Anchor Mev iKD #02
C6KSX8	0	0	398	498	286	276
Q8IB24	1	23	124	141	123	98
Q8I3B0	4	146	154	151	38	51
Q8IDR9	2	86	103	93	99	95
Q8I0P6	3	13	85	92	42	49
C6KT23	3	135	85	117	64	52
Q8IAX6	8	71	107	117	48	58
C6KTA4	1	41	148	179	24	63
Q8IJ32	0	0	33	50	141	99
Q8IIB4	1	75	91	44	32	29
Q8IC05	0	5	41	88	27	27
O77364	4	93	85	107	25	33
Q8I431	4	64	77	89	45	62
Q8II62	0	49	35	80	58	54
Q8I2X4	0	5	73	90	29	34
Q8IM10	0	93	84	68	80	39
A0A143ZYX3	2	94	84	69	21	15
Q8IEM3	3	94	76	91	22	24
O96258	7	66	45	70	17	11
Q8I713	6	41	48	38	63	41
Q8ILK3	2	84	66	59	26	25
Q8IJC6	1	29	37	74	19	33
C0H5G3	0	24	37	46	64	31
Q8IDB0	1	30	52	31	36	49
Q8ILL3	0	23	39	55	54	39
C0H4L5	7	10	22	18	6	3
C0H4K8	0	66	48	49	10	14
Q8IE82	2	39	22	34	29	53
Q8I3R6	1	16	28	24	35	49
C0H4F1	4	21	55	30	21	26
Q8I3T9	0	33	58	42	16	19
O96191	0	38	26	22	26	15
K7NTP5	0	8	37	42	33	0
Q7KQK6	0	1	42	43	23	18
O97248	0	25	27	14	26	15
Q8IKK7	0	4	26	56	27	29
A0A144A1R5	0	0	26	38	21	28
Q8IIV2	0	9	20	26	22	19
P27362	0	2	14	21	21	12
Q8IIV1	0	9	18	22	33	37
Q8IKF0	0	0	19	33	9	17
Q8IIU8	0	6	37	28	13	23
Q8IAX5	1	28	20	28	9	30
C6S3J6	0	56	12	21	8	12
Q8IAX8	2	15	15	17	19	20
Q8IKH8	0	2	34	27	11	7
C0H4A6	0	10	14	41	23	16
Q8I0V4	0	0	33	33	17	11
Q8ILL2	0	15	18	13	14	18
Q7K6A4	0	1	12	24	11	11
Q6LFH8	0	4	5	10	10	9
Q8IKM5	0	5	16	23	9	23
Q8IDQ9	0	2	12	20	16	8
Q8IKW5	0	2	19	14	11	12
Q8IBY4	2	21	22	18	5	8
Q8ID50	0	6	8	16	8	9
C6KSV0	0	22	14	10	8	9
C6KSY6	0	8	26	15	4	5
O97231	0	31	12	6	7	6
O77381	0	2	23	18	8	5
Q8IC01	0	0	12	19	26	22
Q8I463	0	13	8	23	9	18
Q8IDI5	0	12	16	19	6	5
A0A144A0U2	0	5	0	0	8	0
C0H4V6	1	3	15	20	12	8
C0H571	0	0	4	11	11	10
Q9U0K8	0	0	1	2	37	23
Q8IHU0	0	9	11	14	8	17
Q8IJX8	3	10	12	14	12	8
A0A143ZZ61	0	4	7	23	17	11
Q8ILX3	0	0	18	21	7	8
Q8IBA0	0	0	9	13	9	5
Q9TY94	0	0	7	11	0	3
O97313	0	1	4	3	9	10
Q8IBQ6	0	1	10	22	7	5
Q8I5A9	0	0	1	7	5	3
Q8I3R0	0	1	4	10	11	15
C0H5C2	0	5	10	12	6	17
Q8IL02	0	1	3	7	4	9
Q8I5H4	0	6	3	7	1	2
Q8ILN8	1	11	8	8	6	1
A0A5K1K925	0	6	10	12	5	6
A0A143ZWL7	0	2	6	7	6	4
Q8IFP2	0	8	10	12	3	6
Q8IJZ7	0	0	6	10	4	8
C6KSS4	0	1	7	23	0	5
Q8IDS6	0	1	8	10	6	8
Q8I502	0	0	4	9	6	15
A0A5K1K988	0	0	0	0	22	16
Q8IE09	0	2	14	8	5	10
Q8IIA2	0	14	6	8	9	7
Q8IM23	0	3	4	8	10	5
Q8IKL9	0	5	15	12	3	9
Q8II61	0	3	5	9	4	4
A0A5K1K8V8	0	0	8	11	8	8
Q8IDK7	0	0	4	7	0	0
A0A5K1K8H7	0	0	0	5	4	5
O97320	0	3	7	8	3	5
O97285	0	0	4	3	4	2
A0A143ZY58	0	0	1	5	1	6
Q8I3W9	0	0	0	5	0	0
Q8IJ34	0	0	5	9	2	2
Q8ILV2	0	3	7	6	4	2
A0A5K1K8Y8	0	0	3	8	5	5
A0A144A1B3	0	0	0	2	0	0
O97250	2	4	3	2	9	5
Q76NM3	0	4	6	9	11	5
C6KSR4	0	0	0	0	7	18
Q8IET7	0	0	1	9	6	3
Q8IC35	0	0	4	1	0	0
Q8I3T8	0	1	6	11	3	3
Q8I5Y3	0	0	2	4	0	0
Q8IC16	0	0	2	2	0	0
Q8IHT9	0	0	1	7	4	1
O77395	0	1	5	6	3	3
Q8I3L4	0	0	1	1	0	0
Q8IB44	0	0	1	3	0	1
Q6ZLZ9	0	1	3	6	4	3
Q8IK89	0	3	12	7	1	1
Q8IEK3	0	0	3	3	2	1
Q8IBN5	0	0	7	11	3	1
Q8IES0	0	0	0	2	3	2
A0A144A3T1	0	1	5	7	9	3
Q8II24	0	0	5	5	0	0
Q8IJK8	0	1	8	7	5	6
Q8IEQ1	0	0	2	6	1	1
Q8IIJ8	0	0	0	0	0	0
Q8IB51	0	0	3	3	4	6
O97282	0	0	3	7	0	2
Q8I4U5	0	0	3	3	0	0
Q8ILE8	0	2	3	5	3	4
Q8IJS7	0	4	1	4	2	0
C0H516	0	0	0	2	0	2
Q8I3M5	0	0	3	9	3	3
A0A5K1K967	0	0	3	1	1	2
Q8I1S0	0	0	2	7	2	2
Q8IBM9	0	0	0	1	0	0
Q8I3T1	0	0	1	1	0	0
A0A144A3N9	0	0	2	3	0	1
Q8I306	0	4	0	1	8	6
Q8II43	0	0	4	6	0	0
C6KT34	0	0	0	5	3	0
Q8IBT2	0	0	0	0	0	0
Q7KQK3	0	0	3	3	5	1
Q8ILR7	0	0	1	2	0	0
Q8I461	0	0	0	0	0	0
Q76NN8	0	0	0	4	0	0
Q8IE67	0	0	5	4	1	1
Q8IJW0	0	0	2	3	2	1
Q7K6B0	0	0	0	4	1	3

## Sheet: PCA Table
Accession	Description	PC1	PC2
C6KSX8	Uncharacterized protein OS=Plasmodium falciparum (isolate 3D7) OX=36329 GN=PF3D7_0613600 PE=4 SV=1	16.5965	6.92505		Table Analyzed
Q8IB24	Heat shock protein 70 OS=Plasmodium falciparum (isolate 3D7) OX=36329 GN=PF3D7_0818900 PE=3 SV=1	5.26824	1.63583
Q8I3B0	60S ribosomal protein L32 OS=Plasmodium falciparum (isolate 3D7) OX=36329 GN=PF3D7_0903900 PE=1 SV=1	5.4866	-3.71424		PC summary	PC1	PC2	PC3	PC4	PC5	PC6
Q8IDR9	40S ribosomal protein S6 OS=Plasmodium falciparum (isolate 3D7) OX=36329 GN=PF3D7_1342000 PE=1 SV=1	5.01085	-0.670414		Eigenvalue	4.073	1.254	0.4136	0.1976	0.03784	0.02416
Q8I0P6	Elongation factor 1-alpha OS=Plasmodium falciparum (isolate 3D7) OX=36329 GN=PF3D7_1357000 PE=3 SV=1	2.60036	-0.454487		Proportion of variance	67.89%	20.89%	6.89%	3.29%	0.63%	0.40%
C6KT23	60S ribosomal protein L27a, putative OS=Plasmodium falciparum (isolate 3D7) OX=36329 GN=PF3D7_0618300 PE=1 SV=1	4.50616	-2.90986		Cumulative proportion of variance	67.89%	88.78%	95.67%	98.97%	99.60%	100.00%
Q8IAX6	60S ribosomal protein L13 OS=Plasmodium falciparum (isolate 3D7) OX=36329 GN=PF3D7_0814000 PE=1 SV=1	4.72873	-4.02197		Component selection	Selected	Selected
C6KTA4	Pyruvate kinase OS=Plasmodium falciparum (isolate 3D7) OX=36329 GN=PF3D7_0626800 PE=1 SV=1	4.0815	0.184297
Q8IJ32	Dynamin-like protein OS=Plasmodium falciparum (isolate 3D7) OX=36329 GN=PF3D7_1037500 PE=4 SV=1	3.25705	2.46005		Data summary
Q8IIB4	60S ribosomal protein L35, putative OS=Plasmodium falciparum (isolate 3D7) OX=36329 GN=PF3D7_1124900 PE=1 SV=2	2.08714	-1.2317		Total number of variables	6
Q8IC05	Heat shock protein 90 OS=Plasmodium falciparum (isolate 3D7) OX=36329 GN=PF3D7_0708400 PE=1 SV=1	0.929898	0.828613		Total number of components	6
O77364	60S ribosomal protein L26, putative OS=Plasmodium falciparum (isolate 3D7) OX=36329 GN=PF3D7_0312800 PE=1 SV=1	3.24583	-2.99913		Component selection method	Parallel analysis
Q8I431	60S ribosomal protein L4 OS=Plasmodium falciparum (isolate 3D7) OX=36329 GN=PF3D7_0507100 PE=1 SV=1	3.43987	-1.97851		Random seed	339467500
Q8II62	60S ribosomal protein L38 OS=Plasmodium falciparum (isolate 3D7) OX=36329 GN=PF3D7_1130100 PE=1 SV=1	2.14658	0.317747		Number of simulations	1000
Q8I2X4	Heat shock protein 70 OS=Plasmodium falciparum (isolate 3D7) OX=36329 GN=PF3D7_0917900 PE=3 SV=1	1.45246	0.953598		Number of selected components	2
Q8IM10	40S ribosomal protein S8 OS=Plasmodium falciparum (isolate 3D7) OX=36329 GN=PF3D7_1408600 PE=1 SV=1	3.12878	-0.572901		Rows in table	150
A0A143ZYX3	60S ribosomal protein L37ae, putative OS=Plasmodium falciparum (isolate 3D7) OX=36329 GN=PF3D7_0210100.1 PE=3 SV=1	2.21748	-2.31772		Rows skipped (missing data)	0
Q8IEM3	60S ribosomal protein L24, putative OS=Plasmodium falciparum (isolate 3D7) OX=36329 GN=PF3D7_1309100 PE=1 SV=1	2.65511	-2.68171		Rows analyzed (# cases)	150
O96258	40S ribosomal protein S26 OS=Plasmodium falciparum (isolate 3D7) OX=36329 GN=PF3D7_0217800 PE=1 SV=1	2.15746	-4.29563
Q8I713	60S ribosomal protein L36 OS=Plasmodium falciparum (isolate 3D7) OX=36329 GN=PF3D7_1109900 PE=1 SV=2	2.62107	-2.65061
Q8ILK3	60S ribosomal protein L21 OS=Plasmodium falciparum (isolate 3D7) OX=36329 GN=PF3D7_1426000 PE=1 SV=1	2.04935	-2.01249
Q8IJC6	60S ribosomal protein L3 OS=Plasmodium falciparum (isolate 3D7) OX=36329 GN=PF3D7_1027800 PE=1 SV=1	1.14859	-0.270041
C0H5G3	60S ribosomal protein L18-2, putative OS=Plasmodium falciparum (isolate 3D7) OX=36329 GN=PF3D7_1341300 PE=1 SV=1	1.29278	0.647966
Q8IDB0	40S ribosomal protein S15 OS=Plasmodium falciparum (isolate 3D7) OX=36329 GN=PF3D7_1358800 PE=1 SV=1	1.42955	-0.0979845
Q8ILL3	60S ribosomal protein L5, putative OS=Plasmodium falciparum (isolate 3D7) OX=36329 GN=PF3D7_1424100 PE=1 SV=1	1.37513	0.676965
C0H4L5	Ribosomal protein L37 OS=Plasmodium falciparum (isolate 3D7) OX=36329 GN=PF3D7_0706400 PE=1 SV=1	0.519352	-3.37038
C0H4K8	40S ribosomal protein S29, putative OS=Plasmodium falciparum (isolate 3D7) OX=36329 GN=PF3D7_0705700 PE=1 SV=1	0.83167	-0.898563
Q8IE82	60S ribosomal protein L23 OS=Plasmodium falciparum (isolate 3D7) OX=36329 GN=PF3D7_1323400 PE=1 SV=1	1.33805	-0.856974
Q8I3R6	40S ribosomal protein S24 OS=Plasmodium falciparum (isolate 3D7) OX=36329 GN=PF3D7_0519400 PE=1 SV=1	0.929256	0.158031
C0H4F1	FoP domain-containing protein, putative OS=Plasmodium falciparum (isolate 3D7) OX=36329 GN=PF3D7_0519700 PE=4 SV=1	1.23983	-1.71866
Q8I3T9	60S ribosomal protein L2 OS=Plasmodium falciparum (isolate 3D7) OX=36329 GN=PF3D7_0516900 PE=1 SV=1	0.694857	-0.066072
O96191	Uncharacterized protein OS=Plasmodium falciparum (isolate 3D7) OX=36329 GN=PF3D7_0210900 PE=4 SV=1	0.278597	-0.218726
K7NTP5	Heat shock protein 70 OS=Plasmodium falciparum (isolate 3D7) OX=36329 GN=PF3D7_0831700 PE=1 SV=1	0.128419	0.455638
Q7KQK6	GTP-binding nuclear protein OS=Plasmodium falciparum (isolate 3D7) OX=36329 GN=PF3D7_1117700 PE=3 SV=1	0.268128	0.688339
O97248	40S ribosomal protein S23, putative OS=Plasmodium falciparum (isolate 3D7) OX=36329 GN=PF3D7_0306900 PE=1 SV=1	0.0755813	0.0536778
Q8IKK7	Glyceraldehyde-3-phosphate dehydrogenase OS=Plasmodium falciparum (isolate 3D7) OX=36329 GN=PF3D7_1462800 PE=3 SV=1	0.480415	0.764361
A0A144A1R5	Actin I OS=Plasmodium falciparum (isolate 3D7) OX=36329 GN=PF3D7_1246200 PE=3 SV=1	0.164168	0.74504
Q8IIV2	Histone H4 OS=Plasmodium falciparum (isolate 3D7) OX=36329 GN=PF3D7_1105000 PE=3 SV=1	-0.0532291	0.43474
P27362	Phosphoglycerate kinase OS=Plasmodium falciparum (isolate 3D7) OX=36329 GN=PGK PE=1 SV=1	-0.371481	0.501983
Q8IIV1	Histone H2B OS=Plasmodium falciparum (isolate 3D7) OX=36329 GN=PF3D7_1105100 PE=3 SV=1	0.339861	0.673907
Q8IKF0	Eukaryotic initiation factor 4A OS=Plasmodium falciparum (isolate 3D7) OX=36329 GN=PF3D7_1468700 PE=3 SV=1	-0.315643	0.521751
Q8IIU8	40S ribosomal protein S4 OS=Plasmodium falciparum (isolate 3D7) OX=36329 GN=PF3D7_1105400 PE=1 SV=2	0.059775	0.484277
Q8IAX5	40S ribosomal protein S16, putative OS=Plasmodium falciparum (isolate 3D7) OX=36329 GN=PF3D7_0813900 PE=1 SV=1	0.317471	-0.505442
C6S3J6	60S ribosomal protein L29 OS=Plasmodium falciparum (isolate 3D7) OX=36329 GN=PF3D7_1460300 PE=1 SV=1	-0.00679532	-0.829536
Q8IAX8	DNA/RNA-binding protein Alba 1 OS=Plasmodium falciparum (isolate 3D7) OX=36329 GN=PF3D7_0814200 PE=4 SV=1	0.158822	-0.74399
Q8IKH8	40S ribosomal protein S3 OS=Plasmodium falciparum (isolate 3D7) OX=36329 GN=PF3D7_1465900 PE=1 SV=1	-0.316274	0.412273
C0H4A6	Ribosomal protein L15 OS=Plasmodium falciparum (isolate 3D7) OX=36329 GN=PF3D7_0415900 PE=1 SV=1	-0.00276939	0.427027
Q8I0V4	Endoplasmin, putative OS=Plasmodium falciparum (isolate 3D7) OX=36329 GN=PF3D7_1222300 PE=1 SV=1	-0.139769	0.559318
Q8ILL2	60S ribosomal protein L7a OS=Plasmodium falciparum (isolate 3D7) OX=36329 GN=PF3D7_1424400 PE=1 SV=2	-0.26711	0.183505
Q7K6A4	S-adenosylmethionine synthase OS=Plasmodium falciparum (isolate 3D7) OX=36329 GN=PF3D7_0922200 PE=3 SV=1	-0.537785	0.432528
Q6LFH8	Ornithine aminotransferase OS=Plasmodium falciparum (isolate 3D7) OX=36329 GN=OAT PE=1 SV=1	-0.764135	0.292993
Q8IKM5	60S ribosomal protein L27 OS=Plasmodium falciparum (isolate 3D7) OX=36329 GN=PF3D7_1460700 PE=1 SV=2	-0.292724	0.430707
Q8IDQ9	Phosphoethanolamine N-methyltransferase OS=Plasmodium falciparum (isolate 3D7) OX=36329 GN=PF3D7_1343000 PE=4 SV=1	-0.541317	0.418016
Q8IKW5	Elongation factor 2 OS=Plasmodium falciparum (isolate 3D7) OX=36329 GN=PF3D7_1451100 PE=3 SV=1	-0.526507	0.401433
Q8IBY4	60S ribosomal protein L34 OS=Plasmodium falciparum (isolate 3D7) OX=36329 GN=PF3D7_0710600 PE=1 SV=1	-0.0879582	-1.09437
Q8ID50	Ubiquitin OS=Plasmodium falciparum (isolate 3D7) OX=36329 GN=PF3D7_1365900 PE=1 SV=1	-0.681327	0.250048
C6KSV0	Histone H3 OS=Plasmodium falciparum (isolate 3D7) OX=36329 GN=PF3D7_0610400 PE=3 SV=1	-0.499838	-0.117548
C6KSY6	60S ribosomal protein L19 OS=Plasmodium falciparum (isolate 3D7) OX=36329 GN=PF3D7_0614500 PE=1 SV=1	-0.590077	0.156101
O97231	60S ribosomal protein L44 OS=Plasmodium falciparum (isolate 3D7) OX=36329 GN=RPL44 PE=1 SV=3	-0.527667	-0.367653
O77381	40S ribosomal protein S11, putative OS=Plasmodium falciparum (isolate 3D7) OX=36329 GN=PF3D7_0317600 PE=1 SV=2	-0.601429	0.330398
Q8IC01	Heat shock protein 110 OS=Plasmodium falciparum (isolate 3D7) OX=36329 GN=PF3D7_0708800 PE=4 SV=1	-0.198466	0.669383
Q8I463	60S ribosomal protein L31 OS=Plasmodium falciparum (isolate 3D7) OX=36329 GN=PF3D7_0503800 PE=1 SV=1	-0.379099	0.197447
Q8IDI5	60S ribosomal protein L17, putative OS=Plasmodium falciparum (isolate 3D7) OX=36329 GN=PF3D7_1351400 PE=1 SV=1	-0.593189	0.0814119
A0A144A0U2	40S ribosomal protein S30 OS=Plasmodium falciparum (isolate 3D7) OX=36329 GN=PF3D7_0219200 PE=3 SV=1	-1.08023	0.142489
C0H4V6	14-3-3 protein OS=Plasmodium falciparum (isolate 3D7) OX=36329 GN=PF3D7_0818200 PE=3 SV=1	-0.396587	-0.133814
C0H571	High molecular weight rhoptry protein 2 OS=Plasmodium falciparum (isolate 3D7) OX=36329 GN=PF3D7_0929400 PE=4 SV=1	-0.777768	0.401691
Q9U0K8	Protein CINCH OS=Plasmodium falciparum (isolate 3D7) OX=36329 GN=PF3D7_0407800 PE=4 SV=1	-0.307073	0.716303
Q8IHU0	60S ribosomal protein L28 OS=Plasmodium falciparum (isolate 3D7) OX=36329 GN=PF3D7_1142500 PE=1 SV=1	-0.503895	0.25008
Q8IJX8	DNA/RNA-binding protein Alba 3 OS=Plasmodium falciparum (isolate 3D7) OX=36329 GN=PF3D7_1006200 PE=4 SV=1	-0.0957578	-1.30652
A0A143ZZ61	Phosphopyruvate hydratase OS=Plasmodium falciparum (isolate 3D7) OX=36329 GN=PF3D7_1015900 PE=3 SV=1	-0.484459	0.409112
Q8ILX3	Mini-chromosome maintenance complex-binding protein, putative OS=Plasmodium falciparum (isolate 3D7) OX=36329 GN=PF3D7_1412100 PE=4 SV=1	-0.616263	0.393673
Q8IBA0	Receptor for activated c kinase OS=Plasmodium falciparum (isolate 3D7) OX=36329 GN=PF3D7_0826700 PE=4 SV=1	-0.813181	0.352756
Q9TY94	ATP-dependent RNA helicase UAP56 OS=Plasmodium falciparum (isolate 3D7) OX=36329 GN=PF3D7_0209800 PE=4 SV=1	-1.01789	0.247906
O97313	40S ribosomal protein S3a OS=Plasmodium falciparum (isolate 3D7) OX=36329 GN=MAL3P7.35 PE=1 SV=1	-0.871767	0.340403
Q8IBQ6	60S ribosomal protein L11a, putative OS=Plasmodium falciparum (isolate 3D7) OX=36329 GN=PF3D7_0719600 PE=1 SV=1	-0.735199	0.337583
Q8I5A9	Ras-related protein Rab-2 OS=Plasmodium falciparum (isolate 3D7) OX=36329 GN=PF3D7_1231100 PE=4 SV=1	-1.0507	0.273842
Q8I3R0	40S ribosomal protein S9, putative OS=Plasmodium falciparum (isolate 3D7) OX=36329 GN=PF3D7_0520000 PE=1 SV=1	-0.694958	0.419588
C0H5C2	40S ribosomal protein S19 OS=Plasmodium falciparum (isolate 3D7) OX=36329 GN=PF3D7_1317800 PE=1 SV=1	-0.605757	0.31568
Q8IL02	40S ribosomal protein S5 OS=Plasmodium falciparum (isolate 3D7) OX=36329 GN=PF3D7_1447000 PE=1 SV=1	-0.934111	0.296726
Q8I5H4	Polyadenylate-binding protein OS=Plasmodium falciparum (isolate 3D7) OX=36329 GN=PF3D7_1224300 PE=3 SV=1	-1.03857	0.0975459
Q8ILN8	40S ribosomal protein S25 OS=Plasmodium falciparum (isolate 3D7) OX=36329 GN=PF3D7_1421200 PE=1 SV=2	-0.704882	-0.467778
A0A5K1K925	40S ribosomal protein S11 OS=Plasmodium falciparum (isolate 3D7) OX=36329 GN=PF3D7_0516200 PE=3 SV=1	-0.789126	0.189722
A0A143ZWL7	Tubulin beta chain OS=Plasmodium falciparum (isolate 3D7) OX=36329 GN=PF3D7_1008700 PE=3 SV=1	-0.942228	0.252882
Q8IFP2	40S ribosomal protein S19 OS=Plasmodium falciparum (isolate 3D7) OX=36329 GN=PF3D7_0422400 PE=1 SV=1	-0.796827	0.127045
Q8IJZ7	60S ribosomal protein L13, putative OS=Plasmodium falciparum (isolate 3D7) OX=36329 GN=PF3D7_1004000 PE=1 SV=1	-0.898948	0.322424
C6KSS4	Spindle assembly abnormal protein 6, putative OS=Plasmodium falciparum (isolate 3D7) OX=36329 GN=PF3D7_0607600 PE=4 SV=1	-0.861141	0.274264
Q8IDS6	60S ribosomal protein L18a OS=Plasmodium falciparum (isolate 3D7) OX=36329 GN=PF3D7_1341200 PE=1 SV=1	-0.836727	0.320284
Q8I502	40S ribosomal protein S17, putative OS=Plasmodium falciparum (isolate 3D7) OX=36329 GN=PF3D7_1242700 PE=1 SV=1	-0.787656	0.395115
A0A5K1K988	Inner membrane complex protein 1f, putative OS=Plasmodium falciparum (isolate 3D7) OX=36329 GN=PF3D7_1351700 PE=4 SV=1	-0.669218	0.516574
Q8IE09	60S ribosomal protein L23, putative OS=Plasmodium falciparum (isolate 3D7) OX=36329 GN=PF3D7_1331800 PE=1 SV=1	-0.759275	0.308711
Q8IIA2	40S ribosomal protein S18, putative OS=Plasmodium falciparum (isolate 3D7) OX=36329 GN=PF3D7_1126200 PE=1 SV=1	-0.712286	0.0382019
Q8IM23	rRNA 2'-O-methyltransferase fibrillarin, putative OS=Plasmodium falciparum (isolate 3D7) OX=36329 GN=PF3D7_1407100 PE=3 SV=1	-0.87025	0.274484
Q8IKL9	40S ribosomal protein S28e, putative OS=Plasmodium falciparum (isolate 3D7) OX=36329 GN=PF3D7_1461300 PE=1 SV=1	-0.723553	0.226805
Q8II61	60S acidic ribosomal protein P0 OS=Plasmodium falciparum (isolate 3D7) OX=36329 GN=PF3D7_1130200 PE=3 SV=1	-0.952948	0.216648
A0A5K1K8V8	60S ribosomal protein L6, putative OS=Plasmodium falciparum (isolate 3D7) OX=36329 GN=PF3D7_1338200 PE=3 SV=1	-0.808907	0.363121
Q8IDK7	Glutamyl-tRNA synthetase OS=Plasmodium falciparum (isolate 3D7) OX=36329 GN=PF3D7_1349200 PE=3 SV=1	-1.13846	0.20764
A0A5K1K8H7	Ras-related protein Rab-1B OS=Plasmodium falciparum (isolate 3D7) OX=36329 GN=PF3D7_0512600 PE=4 SV=1	-1.06275	0.275606
O97320	Histone H2A OS=Plasmodium falciparum (isolate 3D7) OX=36329 GN=PF3D7_0320900 PE=3 SV=1	-0.938074	0.216362
O97285	ATP-dependent RNA helicase DDX6 OS=Plasmodium falciparum (isolate 3D7) OX=36329 GN=PF3D7_0320800 PE=3 SV=1	-1.08557	0.249751
A0A143ZY58	ADP-ribosylation factor OS=Plasmodium falciparum (isolate 3D7) OX=36329 GN=PF3D7_1020900 PE=3 SV=1	-1.07871	0.258925
Q8I3W9	Ras-related protein Rab-1A OS=Plasmodium falciparum (isolate 3D7) OX=36329 GN=PF3D7_0513800 PE=4 SV=1	-1.20241	0.197146
Q8IJ34	ADP/ATP transporter on adenylate translocase OS=Plasmodium falciparum (isolate 3D7) OX=36329 GN=PF3D7_1037300 PE=3 SV=1	-1.04661	0.249146
Q8ILV2	60S ribosomal protein L10, putative OS=Plasmodium falciparum (isolate 3D7) OX=36329 GN=PF3D7_1414300 PE=1 SV=1	-0.991426	0.194147
A0A5K1K8Y8	DNA/RNA-binding protein Alba 4 OS=Plasmodium falciparum (isolate 3D7) OX=36329 GN=PF3D7_1347500 PE=4 SV=1	-0.986086	0.296293
A0A144A1B3	Protein SEY1 homolog OS=Plasmodium falciparum (isolate 3D7) OX=36329 GN=PF3D7_1416100 PE=3 SV=1	-1.23077	0.189239
O97250	60S ribosomal protein L7, putative OS=Plasmodium falciparum (isolate 3D7) OX=36329 GN=PF3D7_0307200 PE=1 SV=2	-0.625403	-0.769614
Q76NM3	L-lactate dehydrogenase OS=Plasmodium falciparum (isolate 3D7) OX=36329 GN=PF3D7_1324900 PE=1 SV=1	-0.813091	0.266118
C6KSR4	Uncharacterized protein OS=Plasmodium falciparum (isolate 3D7) OX=36329 GN=PF3D7_0606600 PE=4 SV=1	-0.854314	0.400838
Q8IET7	40S ribosomal protein S7 OS=Plasmodium falciparum (isolate 3D7) OX=36329 GN=PF3D7_1302800 PE=1 SV=1	-1.01728	0.287977
Q8IC35	Erythrocyte membrane-associated antigen OS=Plasmodium falciparum (isolate 3D7) OX=36329 GN=PF3D7_0703500 PE=3 SV=2	-1.19518	0.191825
Q8I3T8	60S ribosomal protein L12, putative OS=Plasmodium falciparum (isolate 3D7) OX=36329 GN=PF3D7_0517000 PE=3 SV=2	-0.974944	0.250712
Q8I5Y3	Eukaryotic translation initiation factor 3 subunit C OS=Plasmodium falciparum (isolate 3D7) OX=36329 GN=PF3D7_1206200 PE=3 SV=1	-1.18934	0.197121
Q8IC16	DNA replication licensing factor MCM7 OS=Plasmodium falciparum (isolate 3D7) OX=36329 GN=MCM7 PE=3 SV=1	-1.20825	0.19185
Q8IHT9	60S ribosomal protein L35ae, putative OS=Plasmodium falciparum (isolate 3D7) OX=36329 GN=PF3D7_1142600 PE=1 SV=1	-1.09786	0.247776
O77395	40S ribosomal protein S15A, putative OS=Plasmodium falciparum (isolate 3D7) OX=36329 GN=PF3D7_0316800 PE=1 SV=1	-1.03348	0.236227
Q8I3L4	Acyl-CoA synthetase OS=Plasmodium falciparum (isolate 3D7) OX=36329 GN=PF3D7_0525100 PE=4 SV=1	-1.22897	0.187908
Q8IB44	Uncharacterized protein OS=Plasmodium falciparum (isolate 3D7) OX=36329 GN=PF3D7_0821000 PE=4 SV=1	-1.19374	0.201782
Q6ZLZ9	Tubulin alpha chain OS=Plasmodium falciparum (isolate 3D7) OX=36329 GN=PF3D7_0903700 PE=3 SV=1	-1.04148	0.242479
Q8IK89	Trailer hitch homolog, putative OS=Plasmodium falciparum (isolate 3D7) OX=36329 GN=PF3D7_1474900 PE=4 SV=1	-0.985529	0.168121
Q8IEK3	26S protease regulatory subunit 7, putative OS=Plasmodium falciparum (isolate 3D7) OX=36329 GN=PF3D7_1311500 PE=3 SV=2	-1.14218	0.222118
Q8IBN5	40S ribosomal protein S5, putative OS=Plasmodium falciparum (isolate 3D7) OX=36329 GN=PF3D7_0721600 PE=1 SV=1	-1.00699	0.25729
Q8IES0	Small heat shock protein, putative OS=Plasmodium falciparum (isolate 3D7) OX=36329 GN=PF3D7_1304500 PE=3 SV=1	-1.15459	0.23303
A0A144A3T1	Fructose-bisphosphate aldolase OS=Plasmodium falciparum (isolate 3D7) OX=36329 GN=PF3D7_1444800 PE=3 SV=1	-0.936927	0.292039
Q8II24	Heat shock protein 70 OS=Plasmodium falciparum (isolate 3D7) OX=36329 GN=PF3D7_1134000 PE=3 SV=1	-1.1461	0.203674
Q8IJK8	60S ribosomal protein L30e, putative OS=Plasmodium falciparum (isolate 3D7) OX=36329 GN=PF3D7_1019400 PE=1 SV=1	-0.912245	0.28631
Q8IEQ1	26S protease regulatory subunit 10B, putative OS=Plasmodium falciparum (isolate 3D7) OX=36329 GN=PF3D7_1306400 PE=3 SV=1	-1.1396	0.219858
Q8IIJ8	Heat shock protein 101 OS=Plasmodium falciparum (isolate 3D7) OX=36329 GN=PF3D7_1116800 PE=1 SV=1	-1.24968	0.183967
Q8IB51	60S ribosomal protein L22, putative OS=Plasmodium falciparum (isolate 3D7) OX=36329 GN=PF3D7_0821700 PE=1 SV=1	-1.03155	0.282852
O97282	T-complex protein 1 subunit epsilon OS=Plasmodium falciparum (isolate 3D7) OX=36329 GN=PF3D7_0320300 PE=3 SV=1	-1.11708	0.223538
Q8I4U5	26S protease regulatory subunit 8, putative OS=Plasmodium falciparum (isolate 3D7) OX=36329 GN=PF3D7_1248900 PE=3 SV=1	-1.18753	0.195791
Q8ILE8	60S ribosomal protein L14, putative OS=Plasmodium falciparum (isolate 3D7) OX=36329 GN=PF3D7_1431700 PE=1 SV=1	-1.03847	0.217106
Q8IJS7	PRE-binding protein OS=Plasmodium falciparum (isolate 3D7) OX=36329 GN=PF3D7_1011800 PE=4 SV=1	-1.12891	0.123638
C0H516	Ras-related protein RAB7 OS=Plasmodium falciparum (isolate 3D7) OX=36329 GN=PF3D7_0903200 PE=4 SV=1	-1.19813	0.206442
Q8I3M5	Karyopherin beta OS=Plasmodium falciparum (isolate 3D7) OX=36329 GN=PF3D7_0524000 PE=4 SV=1	-1.0383	0.264
A0A5K1K967	Elongation factor 1-gamma, putative OS=Plasmodium falciparum (isolate 3D7) OX=36329 GN=PF3D7_1338300 PE=4 SV=1	-1.15929	0.216585
Q8I1S0	Small GTP-binding protein sar1 OS=Plasmodium falciparum (isolate 3D7) OX=36329 GN=PF3D7_0416800 PE=3 SV=1	-1.09931	0.239958
Q8IBM9	Obg-like ATPase 1 OS=Plasmodium falciparum (isolate 3D7) OX=36329 GN=PF3D7_0722400 PE=3 SV=1	-1.24023	0.186603
Q8I3T1	Eukaryotic translation initiation factor 3 subunit B OS=Plasmodium falciparum (isolate 3D7) OX=36329 GN=PF3D7_0517700 PE=3 SV=1	-1.22897	0.187908
A0A144A3N9	Actin II OS=Plasmodium falciparum (isolate 3D7) OX=36329 GN=PF3D7_1412500 PE=3 SV=1	-1.18248	0.203087
Q8I306	Transcription elongation factor 1 homolog OS=Plasmodium falciparum (isolate 3D7) OX=36329 GN=PF3D7_0914600 PE=3 SV=1	-0.983522	0.219211
Q8II43	CCT-alpha OS=Plasmodium falciparum (isolate 3D7) OX=36329 GN=PF3D7_1132200 PE=3 SV=1	-1.14791	0.205004
C6KT34	Cell division cycle protein 48 homologue, putative OS=Plasmodium falciparum (isolate 3D7) OX=36329 GN=PF3D7_0619400 PE=4 SV=1	-1.15886	0.223734
Q8IBT2	Eukaryotic translation initiation factor 3 subunit I OS=Plasmodium falciparum (isolate 3D7) OX=36329 GN=PF3D7_0716800 PE=3 SV=1	-1.24968	0.183967
Q7KQK3	Heat shock protein DNAJ homologue Pfj4 OS=Plasmodium falciparum (isolate 3D7) OX=36329 GN=PF3D7_1211400 PE=4 SV=1	-1.09864	0.248706
Q8ILR7	DNA replication licensing factor MCM2 OS=Plasmodium falciparum (isolate 3D7) OX=36329 GN=PF3D7_1417800 PE=3 SV=1	-1.21951	0.190544
Q8I461	Cation transporting P-ATPase OS=Plasmodium falciparum (isolate 3D7) OX=36329 GN=PF3D7_0504000 PE=4 SV=1	-1.24968	0.183967
Q76NN8	Calcium-transporting ATPase OS=Plasmodium falciparum (isolate 3D7) OX=36329 GN=PF3D7_0106300 PE=4 SV=1	-1.21187	0.19451
Q8IE67	Phosphoribosylpyrophosphate synthetase OS=Plasmodium falciparum (isolate 3D7) OX=36329 GN=PF3D7_1325100 PE=3 SV=1	-1.12472	0.218502
Q8IJW0	26S protease regulatory subunit 4, putative OS=Plasmodium falciparum (isolate 3D7) OX=36329 GN=PF3D7_1008400 PE=3 SV=2	-1.15344	0.220813
Q7K6B0	Ras-related protein Rab-18 OS=Plasmodium falciparum (isolate 3D7) OX=36329 GN=PF3D7_0807300 PE=4 SV=1	-1.14839	0.229179
