# Supplementary material for: An Essential Adaptor for Apicoplast Fission and Inheritance in Malaria Parasites
Source: Research Square preprint supplement (doi:10.21203/rs.3.rs-6457426/v1), 2025-05-05
Supplement: Supplementary file 2 [file af55fe60aa5e950eb2d6af16.xlsx]

## Sheet: Anchor_BirA
#2024_01_23_Absalon_233B, Samples Report created on 02/03/2025
					Total Spectrum Count	Total Spectrum Count	Total Spectrum Count	Total Spectrum Count
2024_01_23_Absalon_233B					233B	233B	Control	Control
					233B-1	233B-2	Control-1	Control-2
#	Identified Proteins (331/426)	Accession Number	Alternate ID	Molecular Weight	2025_01_23_Absalon_Exploris_FAIMSaur_4uL_OwenLC_strep: 2025_01_23_Absalon_Exploris_FAIMSaur_4uL_OwenLC_233_B_1	2025_01_23_Absalon_Exploris_FAIMSaur_4uL_OwenLC_strep: 2025_01_23_Absalon_Exploris_FAIMSaur_4uL_OwenLC_233_B_2	2025_01_23_Absalon_Exploris_FAIMSaur_4uL_OwenLC_strep: 2025_01_23_Absalon_Exploris_FAIMSaur_4uL_OwenLC_ctr_1	2025_01_23_Absalon_Exploris_FAIMSaur_4uL_OwenLC_strep: 2025_01_23_Absalon_Exploris_FAIMSaur_4uL_OwenLC_ctr_2
1	Heat shock protein 70 OS=Plasmodium falciparum (isolate 3D7) OX=36329 GN=PF3D7_0818900 PE=3 SV=1	Q8IB24	PF3D7_0818900	74 kDa	48	31	27	61
2	Uncharacterized protein OS=Plasmodium falciparum (isolate 3D7) OX=36329 GN=PF3D7_0613600 PE=4 SV=1	C6KSX8	PF3D7_0613600	124 kDa	105	75	0	0
3	Elongation factor 1-alpha OS=Plasmodium falciparum (isolate 3D7) OX=36329 GN=PF3D7_1357000 PE=3 SV=1	Q8I0P6	PF3D7_1357000	49 kDa	43	32	19	49
4	Heat shock protein 90 OS=Plasmodium falciparum (isolate 3D7) OX=36329 GN=PF3D7_0708400 PE=1 SV=1	Q8IC05	PF3D7_0708400	86 kDa	43	30	21	70
5	Dynamin-like protein OS=Plasmodium falciparum (isolate 3D7) OX=36329 GN=PF3D7_1037500 PE=4 SV=1	Q8IJ32	PF3D7_1037500	82 kDa	88	61	0	0
6	Heat shock protein 70 OS=Plasmodium falciparum (isolate 3D7) OX=36329 GN=PF3D7_0917900 PE=3 SV=1	Q8I2X4	PF3D7_0917900	72 kDa	18	17	13	52
7	Polyadenylate-binding protein OS=Plasmodium falciparum (isolate 3D7) OX=36329 GN=PF3D7_1224300 PE=3 SV=1	Q8I5H4	PF3D7_1224300	97 kDa	15	6	21	24
8	Endoplasmin, putative OS=Plasmodium falciparum (isolate 3D7) OX=36329 GN=PF3D7_1222300 PE=1 SV=1	Q8I0V4	PF3D7_1222300	95 kDa	17	11	11	34
9	Pyruvate kinase OS=Plasmodium falciparum (isolate 3D7) OX=36329 GN=PF3D7_0626800 PE=1 SV=1	C6KTA4	PF3D7_0626800	56 kDa	17	9	12	41
10	Glyceraldehyde-3-phosphate dehydrogenase OS=Plasmodium falciparum (isolate 3D7) OX=36329 GN=PF3D7_1462800 PE=3 SV=1	Q8IKK7	PF3D7_1462800	37 kDa	15	10	13	24
11	Elongation factor 2 OS=Plasmodium falciparum (isolate 3D7) OX=36329 GN=PF3D7_1451100 PE=3 SV=1	Q8IKW5	PF3D7_1451100	94 kDa	11	9	9	24
12	Actin, cytoplasmic 2 OS=Homo sapiens OX=9606 GN=ACTG1 PE=1 SV=9	I3L4N8 (+2)	ACTG1	39 kDa	18	11	12	18
13	Actin I OS=Plasmodium falciparum (isolate 3D7) OX=36329 GN=PF3D7_1246200 PE=3 SV=1	A0A144A1R5	PF3D7_1246200	42 kDa	25	10	4	19
14	S-adenosylmethionine synthase OS=Plasmodium falciparum (isolate 3D7) OX=36329 GN=PF3D7_0922200 PE=3 SV=1	Q7K6A4	PF3D7_0922200	45 kDa	17	9	5	21
15	Phosphoglycerate kinase OS=Plasmodium falciparum (isolate 3D7) OX=36329 GN=PGK PE=1 SV=1	P27362	PGK	45 kDa	20	13	5	21
16	40S ribosomal protein S3 OS=Plasmodium falciparum (isolate 3D7) OX=36329 GN=PF3D7_1465900 PE=1 SV=1	Q8IKH8	PF3D7_1465900	25 kDa	14	9	6	17
17	GTP-binding nuclear protein OS=Plasmodium falciparum (isolate 3D7) OX=36329 GN=PF3D7_1117700 PE=3 SV=1	Q7KQK6	PF3D7_1117700	25 kDa	19	9	7	18
18	High molecular weight rhoptry protein 2 OS=Plasmodium falciparum (isolate 3D7) OX=36329 GN=PF3D7_0929400 PE=4 SV=1	C0H571	PF3D7_0929400	163 kDa	22	4	3	21
19	40S ribosomal protein S4 OS=Plasmodium falciparum (isolate 3D7) OX=36329 GN=PF3D7_1105400 PE=1 SV=2	Q8IIU8	PF3D7_1105400	30 kDa	7	8	10	20
20	60S ribosomal protein L4 OS=Plasmodium falciparum (isolate 3D7) OX=36329 GN=PF3D7_0507100 PE=1 SV=1	Q8I431	PF3D7_0507100	46 kDa	5	6	10	20
21	Histone H4 OS=Plasmodium falciparum (isolate 3D7) OX=36329 GN=PF3D7_1105000 PE=3 SV=1	Q8IIV2	PF3D7_1105000	11 kDa	10	10	9	12
22	Dynamin-like protein, putative OS=Plasmodium falciparum (isolate 3D7) OX=36329 GN=PF3D7_1218500 PE=4 SV=1	Q8I5M3	PF3D7_1218500	123 kDa	0	0	6	38
23	Eukaryotic initiation factor 4A OS=Plasmodium falciparum (isolate 3D7) OX=36329 GN=PF3D7_1468700 PE=3 SV=1	Q8IKF0	PF3D7_1468700	45 kDa	14	10	2	18
24	60S ribosomal protein L3 OS=Plasmodium falciparum (isolate 3D7) OX=36329 GN=PF3D7_1027800 PE=1 SV=1	Q8IJC6	PF3D7_1027800	44 kDa	5	8	8	14
25	Phosphoethanolamine N-methyltransferase OS=Plasmodium falciparum (isolate 3D7) OX=36329 GN=PF3D7_1343000 PE=4 SV=1	Q8IDQ9	PF3D7_1343000	31 kDa	11	4	5	24
26	60S ribosomal protein L5, putative OS=Plasmodium falciparum (isolate 3D7) OX=36329 GN=PF3D7_1424100 PE=1 SV=1	Q8ILL3	PF3D7_1424100	34 kDa	6	6	7	13
27	40S ribosomal protein S3a OS=Plasmodium falciparum (isolate 3D7) OX=36329 GN=MAL3P7.35 PE=1 SV=1	O97313	MAL3P7	30 kDa	5	6	6	17
28	Ornithine aminotransferase OS=Plasmodium falciparum (isolate 3D7) OX=36329 GN=OAT PE=1 SV=1	Q6LFH8	OAT	46 kDa	10	6	3	13
29	Histone H2B OS=Plasmodium falciparum (isolate 3D7) OX=36329 GN=PF3D7_1105100 PE=3 SV=1	Q8IIV1	PF3D7_1105100	13 kDa	9	5	6	8
30	60S ribosomal protein L7, putative OS=Plasmodium falciparum (isolate 3D7) OX=36329 GN=PF3D7_0307200 PE=1 SV=2	O97250	PF3D7_0307200	31 kDa	3	5	2	9
31	Probable ATP-dependent 6-phosphofructokinase OS=Plasmodium falciparum (isolate 3D7) OX=36329 GN=PF3D7_0915400 PE=3 SV=1	Q8I2Z8	PF3D7_0915400	159 kDa	4	6	1	18
32	14-3-3 protein OS=Plasmodium falciparum (isolate 3D7) OX=36329 GN=PF3D7_0818200 PE=3 SV=1	C0H4V6	PF3D7_0818200	30 kDa	6	5	6	17
33	PRE-binding protein OS=Plasmodium falciparum (isolate 3D7) OX=36329 GN=PF3D7_1011800 PE=4 SV=1	Q8IJS7	PF3D7_1011800	132 kDa	7	3	4	16
34	L-lactate dehydrogenase OS=Plasmodium falciparum (isolate 3D7) OX=36329 GN=PF3D7_1324900 PE=1 SV=1	Q76NM3	PF3D7_1324900	34 kDa	4	4	6	10
35	Fructose-bisphosphate aldolase OS=Plasmodium falciparum (isolate 3D7) OX=36329 GN=PF3D7_1444800 PE=3 SV=1	A0A144A3T1	PF3D7_1444800	40 kDa	4	3	6	16
36	Protein disulfide-isomerase OS=Plasmodium falciparum (isolate 3D7) OX=36329 GN=PF3D7_0827900 PE=3 SV=1	C0H4Y6	PF3D7_0827900	56 kDa	3	0	0	23
37	60S ribosomal protein L10, putative OS=Plasmodium falciparum (isolate 3D7) OX=36329 GN=PF3D7_1414300 PE=1 SV=1	Q8ILV2	PF3D7_1414300	25 kDa	7	6	5	10
38	40S ribosomal protein S8 OS=Plasmodium falciparum (isolate 3D7) OX=36329 GN=PF3D7_1408600 PE=1 SV=1	Q8IM10	PF3D7_1408600	25 kDa	8	4	7	12
39	Heat shock protein 110 OS=Plasmodium falciparum (isolate 3D7) OX=36329 GN=PF3D7_0708800 PE=4 SV=1	Q8IC01	PF3D7_0708800	100 kDa	7	5	1	12
40	Mini-chromosome maintenance complex-binding protein, putative OS=Plasmodium falciparum (isolate 3D7) OX=36329 GN=PF3D7_1412100 PE=4 SV=1	Q8ILX3	PF3D7_1412100	113 kDa	17	11	0	0
41	40S ribosomal protein S11 OS=Plasmodium falciparum (isolate 3D7) OX=36329 GN=PF3D7_0516200 PE=3 SV=1	A0A5K1K925	PF3D7_0516200	16 kDa	5	5	6	9
42	DNA/RNA-binding protein Alba 1 OS=Plasmodium falciparum (isolate 3D7) OX=36329 GN=PF3D7_0814200 PE=4 SV=1	Q8IAX8	PF3D7_0814200	27 kDa	7	5	4	7
43	Histone H3 OS=Plasmodium falciparum (isolate 3D7) OX=36329 GN=PF3D7_0610400 PE=3 SV=1	C6KSV0	PF3D7_0610400	15 kDa	4	1	8	6
44	DNA helicase OS=Plasmodium falciparum (isolate 3D7) OX=36329 GN=PF3D7_1211700 PE=3 SV=1	Q8I5T4	PF3D7_1211700	86 kDa	7	4	0	0
45	60S ribosomal protein L27a, putative OS=Plasmodium falciparum (isolate 3D7) OX=36329 GN=PF3D7_0618300 PE=1 SV=1	C6KT23	PF3D7_0618300	17 kDa	6	5	8	8
46	ATP-dependent RNA helicase UAP56 OS=Plasmodium falciparum (isolate 3D7) OX=36329 GN=PF3D7_0209800 PE=4 SV=1	Q9TY94	PF3D7_0209800	52 kDa	11	7	2	10
47	Tubulin alpha chain OS=Plasmodium falciparum (isolate 3D7) OX=36329 GN=PF3D7_0903700 PE=3 SV=1	Q6ZLZ9	PF3D7_0903700	50 kDa	11	2	1	13
48	Receptor for activated c kinase OS=Plasmodium falciparum (isolate 3D7) OX=36329 GN=PF3D7_0826700 PE=4 SV=1	Q8IBA0	PF3D7_0826700	36 kDa	7	5	1	10
49	40S ribosomal protein S9, putative OS=Plasmodium falciparum (isolate 3D7) OX=36329 GN=PF3D7_0520000 PE=1 SV=1	Q8I3R0	PF3D7_0520000	22 kDa	6	5	7	9
50	60S ribosomal protein L17, putative OS=Plasmodium falciparum (isolate 3D7) OX=36329 GN=PF3D7_1351400 PE=1 SV=1	Q8IDI5	PF3D7_1351400	23 kDa	5	5	6	9
51	40S ribosomal protein S5 OS=Plasmodium falciparum (isolate 3D7) OX=36329 GN=PF3D7_1447000 PE=1 SV=1	Q8IL02	PF3D7_1447000	30 kDa	8	2	2	15
52	Heat shock protein 70 OS=Plasmodium falciparum (isolate 3D7) OX=36329 GN=PF3D7_1134000 PE=3 SV=1	Q8II24	PF3D7_1134000	73 kDa	2	1	0	18
53	60S ribosomal protein L13 OS=Plasmodium falciparum (isolate 3D7) OX=36329 GN=PF3D7_0814000 PE=1 SV=1	Q8IAX6	PF3D7_0814000	25 kDa	8	5	5	7
54	60S acidic ribosomal protein P0 OS=Plasmodium falciparum (isolate 3D7) OX=36329 GN=PF3D7_1130200 PE=3 SV=1	Q8II61	PF3D7_1130200	35 kDa	5	3	4	17
55	Phosphotransferase OS=Plasmodium falciparum (isolate 3D7) OX=36329 GN=PF3D7_0624000 PE=3 SV=1	C6KT76	PF3D7_0624000	55 kDa	4	5	2	13
56	Acetyl-CoA carboxylase OS=Plasmodium falciparum (isolate 3D7) OX=36329 GN=PF3D7_1469600 PE=4 SV=2	Q8IKE1	PF3D7_1469600	395 kDa	5	2	2	5
57	40S ribosomal protein S6 OS=Plasmodium falciparum (isolate 3D7) OX=36329 GN=PF3D7_1342000 PE=1 SV=1	Q8IDR9	PF3D7_1342000	35 kDa	5	1	7	8
58	60S ribosomal protein L2 OS=Plasmodium falciparum (isolate 3D7) OX=36329 GN=PF3D7_0516900 PE=1 SV=1	Q8I3T9	PF3D7_0516900	28 kDa	3	4	5	12
59	High molecular weight rhoptry protein 3 OS=Plasmodium falciparum (isolate 3D7) OX=36329 GN=PF3D7_0905400 PE=4 SV=1	Q8I395	PF3D7_0905400	105 kDa	11	2	0	5
60	60S ribosomal protein L7a OS=Plasmodium falciparum (isolate 3D7) OX=36329 GN=PF3D7_1424400 PE=1 SV=2	Q8ILL2	PF3D7_1424400	33 kDa	6	3	4	9
61	40S ribosomal protein S16, putative OS=Plasmodium falciparum (isolate 3D7) OX=36329 GN=PF3D7_0813900 PE=1 SV=1	Q8IAX5	PF3D7_0813900	16 kDa	6	3	3	8
62	Tubulin beta chain OS=Plasmodium falciparum (isolate 3D7) OX=36329 GN=PF3D7_1008700 PE=3 SV=1	A0A143ZWL7	PF3D7_1008700	50 kDa	4	4	1	14
63	AAA family ATPase, putative OS=Plasmodium falciparum (isolate 3D7) OX=36329 GN=PF3D7_0803500 PE=4 SV=1	Q8IAN5	PF3D7_0803500	176 kDa	14	5	0	0
64	Mature parasite-infected erythrocyte surface antigen OS=Plasmodium falciparum (isolate 3D7) OX=36329 GN=PF3D7_0500800 PE=4 SV=1	Q8I492	PF3D7_0500800	168 kDa	2	0	2	14
65	Eukaryotic translation initiation factor 3 subunit A OS=Plasmodium falciparum (isolate 3D7) OX=36329 GN=PF3D7_1212700 PE=3 SV=1	Q8I5S6	PF3D7_1212700	166 kDa	5	1	0	10
66	40S ribosomal protein S15 OS=Plasmodium falciparum (isolate 3D7) OX=36329 GN=PF3D7_1358800 PE=1 SV=1	Q8IDB0	PF3D7_1358800	17 kDa	4	3	5	7
67	40S ribosomal protein S7 OS=Plasmodium falciparum (isolate 3D7) OX=36329 GN=PF3D7_1302800 PE=1 SV=1	Q8IET7	PF3D7_1302800	22 kDa	5	5	4	7
68	60S ribosomal protein L27 OS=Plasmodium falciparum (isolate 3D7) OX=36329 GN=PF3D7_1460700 PE=1 SV=2	Q8IKM5	PF3D7_1460700	17 kDa	6	2	3	8
69	40S ribosomal protein S15A, putative OS=Plasmodium falciparum (isolate 3D7) OX=36329 GN=PF3D7_0316800 PE=1 SV=1	O77395	PF3D7_0316800	15 kDa	4	3	2	9
70	40S ribosomal protein S19 OS=Plasmodium falciparum (isolate 3D7) OX=36329 GN=PF3D7_0422400 PE=1 SV=1	Q8IFP2	PF3D7_0422400	20 kDa	2	2	4	11
71	40S ribosomal protein S11, putative OS=Plasmodium falciparum (isolate 3D7) OX=36329 GN=PF3D7_0317600 PE=1 SV=2	O77381	PF3D7_0317600	19 kDa	6	4	1	6
72	Elongation factor 1-gamma, putative OS=Plasmodium falciparum (isolate 3D7) OX=36329 GN=PF3D7_1338300 PE=4 SV=1	A0A5K1K967	PF3D7_1338300	48 kDa	4	2	1	13
73	Ribosomal protein L15 OS=Plasmodium falciparum (isolate 3D7) OX=36329 GN=PF3D7_0415900 PE=1 SV=1	C0H4A6	PF3D7_0415900	24 kDa	4	3	1	6
74	Histone H2A OS=Plasmodium falciparum (isolate 3D7) OX=36329 GN=PF3D7_0320900 PE=3 SV=1	O97320	PF3D7_0320900	16 kDa	2	2	3	4
75	Histone H2A OS=Plasmodium falciparum (isolate 3D7) OX=36329 GN=PF3D7_0617800 PE=3 SV=1	C6KT18	PF3D7_0617800	14 kDa	1	2	3	6
76	26S protease regulatory subunit 7, putative OS=Plasmodium falciparum (isolate 3D7) OX=36329 GN=PF3D7_1311500 PE=3 SV=2	Q8IEK3	PF3D7_1311500	47 kDa	7	3	0	8
77	60S ribosomal protein L18-2, putative OS=Plasmodium falciparum (isolate 3D7) OX=36329 GN=PF3D7_1341300 PE=1 SV=1	C0H5G3	PF3D7_1341300	21 kDa	5	6	6	4
78	60S ribosomal protein L18a OS=Plasmodium falciparum (isolate 3D7) OX=36329 GN=PF3D7_1341200 PE=1 SV=1	Q8IDS6	PF3D7_1341200	22 kDa	5	4	3	6
79	60S ribosomal protein L21 OS=Plasmodium falciparum (isolate 3D7) OX=36329 GN=PF3D7_1426000 PE=1 SV=1	Q8ILK3	PF3D7_1426000	19 kDa	2	4	6	5
80	ATP-dependent RNA helicase DDX5, putative OS=Plasmodium falciparum (isolate 3D7) OX=36329 GN=PF3D7_1445900 PE=2 SV=2	Q8IL13	PF3D7_1445900	60 kDa	3	1	3	7
81	40S ribosomal protein S5, putative OS=Plasmodium falciparum (isolate 3D7) OX=36329 GN=PF3D7_0721600 PE=1 SV=1	Q8IBN5	PF3D7_0721600	22 kDa	4	1	3	8
82	Rhoptry-associated protein 1 OS=Plasmodium falciparum (isolate 3D7) OX=36329 GN=PF3D7_1410400 PE=4 SV=1	Q8ILZ1	PF3D7_1410400	90 kDa	3	1	4	9
83	Histone H3 OS=Plasmodium falciparum (isolate 3D7) OX=36329 GN=PF3D7_0617900 PE=3 SV=1	C6KT19	PF3D7_0617900	15 kDa	2	1	5	4
84	Karyopherin beta OS=Plasmodium falciparum (isolate 3D7) OX=36329 GN=PF3D7_0524000 PE=4 SV=1	Q8I3M5	PF3D7_0524000	127 kDa	3	0	0	14
85	Phosphoglycerate mutase OS=Plasmodium falciparum (isolate 3D7) OX=36329 GN=PF3D7_1120100 PE=1 SV=1	Q8IIG6	PF3D7_1120100	29 kDa	2	2	2	13
86	40S ribosomal protein S18, putative OS=Plasmodium falciparum (isolate 3D7) OX=36329 GN=PF3D7_1126200 PE=1 SV=1	Q8IIA2	PF3D7_1126200	18 kDa	4	1	4	8
87	Ras-related protein Rab-1B OS=Plasmodium falciparum (isolate 3D7) OX=36329 GN=PF3D7_0512600 PE=4 SV=1	A0A5K1K8H7	PF3D7_0512600	23 kDa	6	2	1	3
88	Merozoite surface antigens OS=Plasmodium falciparum (isolate 3D7) OX=36329 GN=PF3D7_0930300 PE=4 SV=1	Q8I0U8	PF3D7_0930300	196 kDa	1	1	0	11
89	DNA replication licensing factor MCM7 OS=Plasmodium falciparum (isolate 3D7) OX=36329 GN=MCM7 PE=3 SV=1	Q8IC16	MCM7	94 kDa	6	4	0	4
90	ADP-ribosylation factor OS=Plasmodium falciparum (isolate 3D7) OX=36329 GN=PF3D7_1020900 PE=3 SV=1	A0A143ZY58	PF3D7_1020900	21 kDa	11	3	0	7
91	60S ribosomal protein L6, putative OS=Plasmodium falciparum (isolate 3D7) OX=36329 GN=PF3D7_1338200 PE=3 SV=1	A0A5K1K8V8	PF3D7_1338200	26 kDa	6	4	1	5
92	CCT-beta OS=Plasmodium falciparum (isolate 3D7) OX=36329 GN=PF3D7_0306800 PE=3 SV=4	O97247	PF3D7_0306800	59 kDa	4	1	0	11
93	Rhoptry neck protein 3 OS=Plasmodium falciparum (isolate 3D7) OX=36329 GN=PF3D7_1252100 PE=4 SV=1	Q8I4R5	PF3D7_1252100	263 kDa	4	2	1	6
94	T-complex protein 1 subunit delta OS=Plasmodium falciparum (isolate 3D7) OX=36329 GN=PF3D7_1357800 PE=3 SV=1	C0H5I7	PF3D7_1357800	58 kDa	4	1	0	6
95	Thioredoxin-like mero protein OS=Plasmodium falciparum (isolate 3D7) OX=36329 GN=PF3D7_1104400 PE=4 SV=1	Q8IIV8	PF3D7_1104400	49 kDa	3	1	0	10
96	T-complex protein 1 subunit gamma OS=Plasmodium falciparum (isolate 3D7) OX=36329 GN=PF3D7_1229500 PE=3 SV=1	Q8I5C4	PF3D7_1229500	61 kDa	3	0	2	9
97	Cell division cycle protein 48 homologue, putative OS=Plasmodium falciparum (isolate 3D7) OX=36329 GN=PF3D7_0619400 PE=4 SV=1	C6KT34	PF3D7_0619400	92 kDa	1	0	1	15
98	60S ribosomal protein L23 OS=Plasmodium falciparum (isolate 3D7) OX=36329 GN=PF3D7_1323400 PE=1 SV=1	Q8IE82	PF3D7_1323400	22 kDa	3	0	3	10
99	Methionine--tRNA ligase OS=Plasmodium falciparum (isolate 3D7) OX=36329 GN=PF3D7_1034900 PE=3 SV=1	Q8IJ60	PF3D7_1034900	104 kDa	3	2	3	8
100	Phosphopyruvate hydratase OS=Plasmodium falciparum (isolate 3D7) OX=36329 GN=PF3D7_1015900 PE=3 SV=1	A0A143ZZ61	PF3D7_1015900	49 kDa	2	1	3	6
101	26S protease regulatory subunit 8, putative OS=Plasmodium falciparum (isolate 3D7) OX=36329 GN=PF3D7_1248900 PE=3 SV=1	Q8I4U5	PF3D7_1248900	50 kDa	4	1	0	4
102	Multidrug resistance protein 1 OS=Plasmodium falciparum (isolate 3D7) OX=36329 GN=PF3D7_0523000 PE=4 SV=1	Q7K6A5	PF3D7_0523000	162 kDa	1	1	0	12
103	40S ribosomal protein S17, putative OS=Plasmodium falciparum (isolate 3D7) OX=36329 GN=PF3D7_1242700 PE=1 SV=1	Q8I502	PF3D7_1242700	16 kDa	2	3	2	8
104	Gamete antigen 27/25 OS=Plasmodium falciparum (isolate 3D7) OX=36329 GN=PF3D7_1302100 PE=1 SV=1	Q8IEU2	PF3D7_1302100	26 kDa	8	4	2	5
105	40S ribosomal protein S20e, putative OS=Plasmodium falciparum (isolate 3D7) OX=36329 GN=PF3D7_1003500 PE=1 SV=1	Q8IK02	PF3D7_1003500	14 kDa	1	1	2	5
106	40S ribosomal protein S19 OS=Plasmodium falciparum (isolate 3D7) OX=36329 GN=PF3D7_1317800 PE=1 SV=1	C0H5C2	PF3D7_1317800	17 kDa	3	2	4	5
107	60S ribosomal protein L6, putative OS=Plasmodium falciparum (isolate 3D7) OX=36329 GN=PF3D7_1323100 PE=1 SV=1	Q8IE85	PF3D7_1323100	22 kDa	4	0	1	7
108	60S ribosomal protein L13, putative OS=Plasmodium falciparum (isolate 3D7) OX=36329 GN=PF3D7_1004000 PE=1 SV=1	Q8IJZ7	PF3D7_1004000	24 kDa	2	1	0	4
109	Erythrocyte membrane-associated antigen OS=Plasmodium falciparum (isolate 3D7) OX=36329 GN=PF3D7_0703500 PE=3 SV=2	Q8IC35	PF3D7_0703500	265 kDa	1	1	0	7
110	40S ribosomal protein S10, putative OS=Plasmodium falciparum (isolate 3D7) OX=36329 GN=PF3D7_0719700 PE=1 SV=1	Q8IBQ5	PF3D7_0719700	16 kDa	3	0	2	7
111	60S ribosomal protein L11a, putative OS=Plasmodium falciparum (isolate 3D7) OX=36329 GN=PF3D7_0719600 PE=1 SV=1	Q8IBQ6	PF3D7_0719600	20 kDa	3	3	4	5
112	60S ribosomal protein L26, putative OS=Plasmodium falciparum (isolate 3D7) OX=36329 GN=PF3D7_0312800 PE=1 SV=1	O77364	PF3D7_0312800	15 kDa	4	4	3	3
113	60S ribosomal protein L12, putative OS=Plasmodium falciparum (isolate 3D7) OX=36329 GN=PF3D7_0517000 PE=3 SV=2	Q8I3T8	PF3D7_0517000	18 kDa	4	3	1	6
114	Ras-related protein Rab-2 OS=Plasmodium falciparum (isolate 3D7) OX=36329 GN=PF3D7_1231100 PE=4 SV=1	Q8I5A9	PF3D7_1231100	24 kDa	8	4	1	4
115	Acyl-CoA synthetase OS=Plasmodium falciparum (isolate 3D7) OX=36329 GN=PF3D7_0525100 PE=4 SV=1	Q8I3L4	PF3D7_0525100	77 kDa	5	1	1	7
116	40S ribosomal protein S24 OS=Plasmodium falciparum (isolate 3D7) OX=36329 GN=PF3D7_0519400 PE=1 SV=1	Q8I3R6	PF3D7_0519400	15 kDa	0	0	2	5
117	Importin subunit alpha OS=Plasmodium falciparum (isolate 3D7) OX=36329 GN=PF3D7_0812400 PE=3 SV=1	Q8IAW0	PF3D7_0812400	61 kDa	3	0	0	7
118	RNA-binding protein, putative OS=Plasmodium falciparum (isolate 3D7) OX=36329 GN=PF3D7_0823200 PE=4 SV=1	Q8IB66	PF3D7_0823200	32 kDa	2	1	2	4
119	Ribosomal protein L37 OS=Plasmodium falciparum (isolate 3D7) OX=36329 GN=PF3D7_0706400 PE=1 SV=1	C0H4L5	PF3D7_0706400	11 kDa	0	0	2	0
120	HSP40, subfamily A OS=Plasmodium falciparum (isolate 3D7) OX=36329 GN=PF3D7_1437900 PE=4 SV=1	Q8IL88	PF3D7_1437900	48 kDa	4	2	0	4
121	Glutamyl-tRNA synthetase OS=Plasmodium falciparum (isolate 3D7) OX=36329 GN=PF3D7_1349200 PE=3 SV=1	Q8IDK7	PF3D7_1349200	101 kDa	2	0	1	7
122	Histone H2B OS=Plasmodium falciparum (isolate 3D7) OX=36329 GN=PF3D7_0714000 PE=3 SV=1	Q8IBV7	PF3D7_0714000	14 kDa	2	2	5	3
123	DNA/RNA-binding protein Alba 3 OS=Plasmodium falciparum (isolate 3D7) OX=36329 GN=PF3D7_1006200 PE=4 SV=1	Q8IJX8	PF3D7_1006200	12 kDa	4	3	2	5
124	60S ribosomal protein L28 OS=Plasmodium falciparum (isolate 3D7) OX=36329 GN=PF3D7_1142500 PE=1 SV=1	Q8IHU0	PF3D7_1142500	14 kDa	3	1	4	5
125	Ubiquitin OS=Plasmodium falciparum (isolate 3D7) OX=36329 GN=PF3D7_1365900 PE=1 SV=1	Q8ID50	PF3D7_1365900	15 kDa	4	2	1	1
126	Calcium-transporting ATPase OS=Plasmodium falciparum (isolate 3D7) OX=36329 GN=PF3D7_0106300 PE=4 SV=1	Q76NN8	PF3D7_0106300	139 kDa	7	0	2	4
127	60S ribosomal protein L19 OS=Plasmodium falciparum (isolate 3D7) OX=36329 GN=PF3D7_0614500 PE=1 SV=1	C6KSY6	PF3D7_0614500	22 kDa	2	4	2	5
128	Small GTP-binding protein sar1 OS=Plasmodium falciparum (isolate 3D7) OX=36329 GN=PF3D7_0416800 PE=3 SV=1	Q8I1S0	PF3D7_0416800	22 kDa	7	1	1	3
129	Thioredoxin-related protein, putative OS=Plasmodium falciparum (isolate 3D7) OX=36329 GN=PF3D7_1352500 PE=4 SV=1	Q8IDH5	PF3D7_1352500	24 kDa	3	0	1	8
130	NPL domain-containing protein OS=Plasmodium falciparum (isolate 3D7) OX=36329 GN=PF3D7_0813300 PE=4 SV=1	C0H4U4	PF3D7_0813300	36 kDa	1	1	0	8
131	26S protease regulatory subunit 10B, putative OS=Plasmodium falciparum (isolate 3D7) OX=36329 GN=PF3D7_1306400 PE=3 SV=1	Q8IEQ1	PF3D7_1306400	45 kDa	4	1	0	5
132	40S ribosomal protein S25 OS=Plasmodium falciparum (isolate 3D7) OX=36329 GN=PF3D7_1421200 PE=1 SV=2	Q8ILN8	PF3D7_1421200	12 kDa	2	2	4	4
133	40S ribosomal protein S29, putative OS=Plasmodium falciparum (isolate 3D7) OX=36329 GN=PF3D7_0705700 PE=1 SV=1	C0H4K8	PF3D7_0705700	6 kDa	2	2	3	1
134	Eukaryotic translation initiation factor 3 subunit B OS=Plasmodium falciparum (isolate 3D7) OX=36329 GN=PF3D7_0517700 PE=3 SV=1	Q8I3T1	PF3D7_0517700	84 kDa	1	2	1	3
135	60S ribosomal protein L24, putative OS=Plasmodium falciparum (isolate 3D7) OX=36329 GN=PF3D7_1309100 PE=1 SV=1	Q8IEM3	PF3D7_1309100	19 kDa	2	0	3	4
136	60S ribosomal protein L14, putative OS=Plasmodium falciparum (isolate 3D7) OX=36329 GN=PF3D7_1431700 PE=1 SV=1	Q8ILE8	PF3D7_1431700	19 kDa	1	4	2	5
137	Single-strand telomeric DNA-binding protein GBP2, putative OS=Plasmodium falciparum (isolate 3D7) OX=36329 GN=PF3D7_1006800 PE=4 SV=1	Q8IJX3	PF3D7_1006800	30 kDa	3	1	2	4
138	V-type proton ATPase catalytic subunit A OS=Plasmodium falciparum (isolate 3D7) OX=36329 GN=vapA PE=1 SV=1	Q76NM6	vapA	69 kDa	1	0	0	2
139	60S ribosomal protein L32 OS=Plasmodium falciparum (isolate 3D7) OX=36329 GN=PF3D7_0903900 PE=1 SV=1	Q8I3B0	PF3D7_0903900	16 kDa	1	0	4	4
140	CCT-alpha OS=Plasmodium falciparum (isolate 3D7) OX=36329 GN=PF3D7_1132200 PE=3 SV=1	Q8II43	PF3D7_1132200	60 kDa	3	0	0	6
141	Cation transporting P-ATPase OS=Plasmodium falciparum (isolate 3D7) OX=36329 GN=PF3D7_0504000 PE=4 SV=1	Q8I461	PF3D7_0504000	283 kDa	5	4	0	0
142	M1-family alanyl aminopeptidase OS=Plasmodium falciparum (isolate 3D7) OX=36329 GN=PF3D7_1311800 PE=1 SV=1	Q8IEK1	PF3D7_1311800	126 kDa	0	0	0	11
143	DNA/RNA-binding protein Alba 4 OS=Plasmodium falciparum (isolate 3D7) OX=36329 GN=PF3D7_1347500 PE=4 SV=1	A0A5K1K8Y8	PF3D7_1347500	42 kDa	5	0	1	2
144	40S ribosomal protein S23, putative OS=Plasmodium falciparum (isolate 3D7) OX=36329 GN=PF3D7_0306900 PE=1 SV=1	O97248	PF3D7_0306900	16 kDa	4	2	0	3
145	Obg-like ATPase 1 OS=Plasmodium falciparum (isolate 3D7) OX=36329 GN=PF3D7_0722400 PE=3 SV=1	Q8IBM9	PF3D7_0722400	45 kDa	5	1	0	3
146	Heat shock protein 101 OS=Plasmodium falciparum (isolate 3D7) OX=36329 GN=PF3D7_1116800 PE=1 SV=1	Q8IIJ8	PF3D7_1116800	103 kDa	1	0	0	5
147	60S ribosomal protein L23, putative OS=Plasmodium falciparum (isolate 3D7) OX=36329 GN=PF3D7_1331800 PE=1 SV=1	Q8IE09	PF3D7_1331800	15 kDa	3	3	0	4
148	Endoplasmic reticulum-resident calcium binding protein OS=Plasmodium falciparum (isolate 3D7) OX=36329 GN=PF3D7_1108600 PE=4 SV=1	Q8IIR7	PF3D7_1108600	39 kDa	1	0	0	10
149	Dihydrolipoyllysine-residue succinyltransferase OS=Plasmodium falciparum (isolate 3D7) OX=36329 GN=PF3D7_1320800 PE=3 SV=1	Q8IEA6	PF3D7_1320800	48 kDa	0	8	0	1
150	PI31 domain-containing protein, putative OS=Plasmodium falciparum (isolate 3D7) OX=36329 GN=PF3D7_1010100 PE=4 SV=1	Q8IJU4	PF3D7_1010100	36 kDa	0	0	1	8
151	40S ribosomal protein S26 OS=Plasmodium falciparum (isolate 3D7) OX=36329 GN=PF3D7_0217800 PE=1 SV=1	O96258	PF3D7_0217800	13 kDa	3	3	3	2
152	Vesicle-associated membrane protein, putative OS=Plasmodium falciparum (isolate 3D7) OX=36329 GN=PF3D7_1439800 PE=4 SV=1	Q8IL71	PF3D7_1439800	28 kDa	4	1	1	3
153	Uncharacterized protein OS=Plasmodium falciparum (isolate 3D7) OX=36329 GN=PF3D7_0617200 PE=4 SV=1	C6KT13	PF3D7_0617200	53 kDa	1	2	2	5
154	60S ribosomal protein L30e, putative OS=Plasmodium falciparum (isolate 3D7) OX=36329 GN=PF3D7_1019400 PE=1 SV=1	Q8IJK8	PF3D7_1019400	12 kDa	3	2	1	5
155	60S ribosomal protein L35ae, putative OS=Plasmodium falciparum (isolate 3D7) OX=36329 GN=PF3D7_1142600 PE=1 SV=1	Q8IHT9	PF3D7_1142600	16 kDa	0	1	1	3
156	ADP/ATP transporter on adenylate translocase OS=Plasmodium falciparum (isolate 3D7) OX=36329 GN=PF3D7_1037300 PE=3 SV=1	Q8IJ34	PF3D7_1037300	34 kDa	0	2	0	5
157	26S proteasome regulatory subunit RPN11 OS=Plasmodium falciparum (isolate 3D7) OX=36329 GN=PF3D7_1368100 PE=4 SV=1	Q8ID28	PF3D7_1368100	35 kDa	1	1	0	3
158	DnaJ protein, putative OS=Plasmodium falciparum (isolate 3D7) OX=36329 GN=PF3D7_0823800 PE=4 SV=1	Q8IB72	PF3D7_0823800	77 kDa	0	0	0	8
159	Uncharacterized protein OS=Plasmodium falciparum (isolate 3D7) OX=36329 GN=PF3D7_1445700 PE=4 SV=1	Q8IL16	PF3D7_1445700	42 kDa	1	0	0	3
160	T-complex protein 1 subunit zeta OS=Plasmodium falciparum (isolate 3D7) OX=36329 GN=PF3D7_0608700 PE=3 SV=1	C6KST5	PF3D7_0608700	62 kDa	2	1	0	3
161	Ribonucleoside-diphosphate reductase OS=Plasmodium falciparum (isolate 3D7) OX=36329 GN=PF3D7_1437200 PE=3 SV=1	Q8IL94	PF3D7_1437200	97 kDa	2	0	0	5
162	Ras-related protein RAB7 OS=Plasmodium falciparum (isolate 3D7) OX=36329 GN=PF3D7_0903200 PE=4 SV=1	C0H516	PF3D7_0903200	24 kDa	3	0	0	3
163	40S ribosomal protein S21 OS=Plasmodium falciparum (isolate 3D7) OX=36329 GN=PF3D7_1144000 PE=1 SV=1	Q8IHS5	PF3D7_1144000	9 kDa	2	1	0	5
164	Eukaryotic translation initiation factor 3 subunit I OS=Plasmodium falciparum (isolate 3D7) OX=36329 GN=PF3D7_0716800 PE=3 SV=1	Q8IBT2	PF3D7_0716800	37 kDa	4	1	0	2
165	26S protease regulatory subunit 6B, putative OS=Plasmodium falciparum (isolate 3D7) OX=36329 GN=PF3D7_0413600 PE=3 SV=1	Q8I1V1	PF3D7_0413600	45 kDa	1	1	1	4
166	Tudor staphylococcal nuclease OS=Plasmodium falciparum (isolate 3D7) OX=36329 GN=PF3D7_1136300 PE=4 SV=1	Q8II01	PF3D7_1136300	129 kDa	1	1	2	2
167	Replication protein A1, small OS=Plasmodium falciparum (isolate 3D7) OX=36329 GN=PF3D7_0904800 PE=4 SV=1	Q8I3A1	PF3D7_0904800	56 kDa	1	1	1	5
168	60S ribosomal protein L35, putative OS=Plasmodium falciparum (isolate 3D7) OX=36329 GN=PF3D7_1124900 PE=1 SV=2	Q8IIB4	PF3D7_1124900	15 kDa	1	2	1	2
169	60S ribosomal protein L36 OS=Plasmodium falciparum (isolate 3D7) OX=36329 GN=PF3D7_1109900 PE=1 SV=2	Q8I713	PF3D7_1109900	13 kDa	0	4	2	2
170	FACT complex subunit OS=Plasmodium falciparum (isolate 3D7) OX=36329 GN=PF3D7_0517400 PE=3 SV=1	Q8I3T4	PF3D7_0517400	133 kDa	2	1	0	6
171	Elongation factor 1-beta OS=Plasmodium falciparum (isolate 3D7) OX=36329 GN=PF3D7_0913200 PE=3 SV=1	Q8I320	PF3D7_0913200	32 kDa	2	0	1	4
172	Vacuolar proton pump subunit B OS=Plasmodium falciparum (isolate 3D7) OX=36329 GN=PF3D7_0406100 PE=3 SV=1	Q6ZMA8	PF3D7_0406100	56 kDa	2	0	0	3
173	Uncharacterized protein OS=Plasmodium falciparum (isolate 3D7) OX=36329 GN=PF3D7_1419700 PE=4 SV=1	Q8ILQ3	PF3D7_1419700	60 kDa	1	1	0	3
174	Coatomer alpha subunit, putative OS=Plasmodium falciparum (isolate 3D7) OX=36329 GN=PF3D7_0606700 PE=4 SV=1	C6KSR5	PF3D7_0606700	177 kDa	2	0	0	4
175	DNA helicase OS=Plasmodium falciparum (isolate 3D7) OX=36329 GN=PF3D7_1317100 PE=3 SV=1	Q8IEE5	PF3D7_1317100	115 kDa	1	0	0	4
176	Polyadenylate-binding protein 2, putative OS=Plasmodium falciparum (isolate 3D7) OX=36329 GN=PF3D7_0923900 PE=4 SV=1	Q8I2R8	PF3D7_0923900	23 kDa	2	1	1	3
177	Actin II OS=Plasmodium falciparum (isolate 3D7) OX=36329 GN=PF3D7_1412500 PE=3 SV=1	A0A144A3N9	PF3D7_1412500	43 kDa	1	1	1	3
178	Clathrin heavy chain OS=Plasmodium falciparum (isolate 3D7) OX=36329 GN=PF3D7_1219100 PE=3 SV=1	Q8I5L6	PF3D7_1219100	233 kDa	1	0	1	4
179	60S ribosomal protein L44 OS=Plasmodium falciparum (isolate 3D7) OX=36329 GN=RPL44 PE=1 SV=3	O97231	RPL44	12 kDa	1	1	4	0
180	Uncharacterized protein MAL13P1.336 OS=Plasmodium falciparum (isolate 3D7) OX=36329 GN=MAL13P1.336 PE=1 SV=1	Q8ID39	MAL13P1	79 kDa	1	0	1	3
181	Uncharacterized protein OS=Plasmodium falciparum (isolate 3D7) OX=36329 GN=PF3D7_1036900 PE=4 SV=1	A0A143ZYL5	PF3D7_1036900	193 kDa	1	0	1	2
182	26S protease regulatory subunit 4, putative OS=Plasmodium falciparum (isolate 3D7) OX=36329 GN=PF3D7_1008400 PE=3 SV=2	Q8IJW0	PF3D7_1008400	50 kDa	3	1	0	2
183	Carbamoyl phosphate synthetase OS=Plasmodium falciparum (isolate 3D7) OX=36329 GN=PF3D7_1308200 PE=4 SV=1	Q8IEN3	PF3D7_1308200	273 kDa	1	2	0	3
184	Acid phosphatase OS=Plasmodium falciparum (isolate 3D7) OX=36329 GN=PF3D7_0918000 PE=1 SV=1	Q8I2X3	PF3D7_0918000	45 kDa	3	0	1	4
185	Protein-synthesizing GTPase OS=Plasmodium falciparum (isolate 3D7) OX=36329 GN=PF3D7_1410600 PE=4 SV=1	Q8ILY9	PF3D7_1410600	51 kDa	2	0	0	3
186	DNA replication licensing factor MCM2 OS=Plasmodium falciparum (isolate 3D7) OX=36329 GN=PF3D7_1417800 PE=3 SV=1	Q8ILR7	PF3D7_1417800	112 kDa	0	0	0	4
187	DNA replication licensing factor MCM3, putative OS=Plasmodium falciparum (isolate 3D7) OX=36329 GN=PF3D7_0527000 PE=3 SV=1	Q8I3J5	PF3D7_0527000	110 kDa	0	0	0	4
188	2-oxoglutarate dehydrogenase E1 component OS=Plasmodium falciparum (isolate 3D7) OX=36329 GN=PF3D7_0820700 PE=3 SV=1	Q8I6S5	PF3D7_0820700	121 kDa	0	5	0	0
189	Eukaryotic translation initiation factor 3 subunit D OS=Plasmodium falciparum (isolate 3D7) OX=36329 GN=PF3D7_1007900 PE=3 SV=1	Q8IJW4	PF3D7_1007900	63 kDa	0	0	0	6
190	Cofilin/actin-depolymerizing factor homolog 1 OS=Plasmodium falciparum (isolate 3D7) OX=36329 GN=PFE0165w PE=1 SV=1	Q8I467	PFE0165w	14 kDa	2	2	1	2
191	High mobility group protein B1 OS=Plasmodium falciparum (isolate 3D7) OX=36329 GN=PF3D7_1202900 PE=4 SV=1	Q8I616	PF3D7_1202900	11 kDa	2	3	1	1
192	ATP-dependent RNA helicase DBP1, putative OS=Plasmodium falciparum (isolate 3D7) OX=36329 GN=PF3D7_0810600 PE=4 SV=1	Q8IAU1	PF3D7_0810600	109 kDa	1	1	1	2
193	40S ribosomal protein SA OS=Plasmodium falciparum (isolate 3D7) OX=36329 GN=PF3D7_1026800 PE=3 SV=1	A0A143ZZG2	PF3D7_1026800	30 kDa	2	1	1	3
194	Ras-related protein Rab-18 OS=Plasmodium falciparum (isolate 3D7) OX=36329 GN=PF3D7_0807300 PE=4 SV=1	Q7K6B0	PF3D7_0807300	23 kDa	2	1	0	1
195	Myosin F, putative OS=Plasmodium falciparum (isolate 3D7) OX=36329 GN=PF3D7_1329100 PE=3 SV=1	Q8IE50	PF3D7_1329100	250 kDa	4	0	0	0
196	26S protease regulatory subunit 6A, putative OS=Plasmodium falciparum (isolate 3D7) OX=36329 GN=PF3D7_1130400 PE=3 SV=1	Q8II60	PF3D7_1130400	50 kDa	1	1	0	5
197	40S ribosomal protein S28e, putative OS=Plasmodium falciparum (isolate 3D7) OX=36329 GN=PF3D7_1461300 PE=1 SV=1	Q8IKL9	PF3D7_1461300	7 kDa	1	1	0	4
198	Glideosome-associated connector OS=Plasmodium falciparum (isolate 3D7) OX=36329 GN=PF3D7_1361800 PE=4 SV=1	A0A5K1K8J3	PF3D7_1361800	291 kDa	0	1	0	4
199	60S ribosomal protein L1, putative OS=Plasmodium falciparum (isolate 3D7) OX=36329 GN=PF3D7_1441200 PE=3 SV=1	Q8IL58	PF3D7_1441200	25 kDa	0	1	0	4
200	Cytoadherence linked asexual protein 3.1 OS=Plasmodium falciparum (isolate 3D7) OX=36329 GN=PF3D7_0302500 PE=4 SV=2	O77310	PF3D7_0302500	167 kDa	2	1	0	1
201	Eukaryotic translation initiation factor 3 subunit C OS=Plasmodium falciparum (isolate 3D7) OX=36329 GN=PF3D7_1206200 PE=3 SV=1	Q8I5Y3	PF3D7_1206200	116 kDa	2	0	0	1
202	Nucleosome assembly protein OS=Plasmodium falciparum (isolate 3D7) OX=36329 GN=PF3D7_0919000 PE=3 SV=1	Q8I2W3	PF3D7_0919000	32 kDa	2	0	0	3
203	26S proteasome regulatory subunit RPN1, putative OS=Plasmodium falciparum (isolate 3D7) OX=36329 GN=PF3D7_0205900 PE=3 SV=3	O96153	PF3D7_0205900	108 kDa	2	2	0	2
204	cAMP-dependent protein kinase regulatory subunit OS=Plasmodium falciparum (isolate 3D7) OX=36329 GN=PF3D7_1223100 PE=1 SV=1	Q7KQK0	PF3D7_1223100	51 kDa	3	0	0	1
205	Isoleucyl-tRNA synthetase OS=Plasmodium falciparum (isolate 3D7) OX=36329 GN=PF3D7_1332900 PE=3 SV=1	Q8IDZ9	PF3D7_1332900	151 kDa	0	0	0	3
206	Nucleosome assembly protein OS=Plasmodium falciparum (isolate 3D7) OX=36329 GN=PF3D7_1203700 PE=1 SV=2	Q8I608	PF3D7_1203700	40 kDa	2	2	0	0
207	T-complex protein 1 subunit theta OS=Plasmodium falciparum (isolate 3D7) OX=36329 GN=PF3D7_0214000 PE=3 SV=3	O96220	PF3D7_0214000	61 kDa	1	1	0	5
208	Uncharacterized protein OS=Plasmodium falciparum (isolate 3D7) OX=36329 GN=PF3D7_1352400 PE=4 SV=1	A0A5K1K907	PF3D7_1352400	190 kDa	4	0	0	0
209	FACT complex subunit SSRP1 OS=Plasmodium falciparum (isolate 3D7) OX=36329 GN=PF3D7_1441400 PE=3 SV=1	Q8IL56	PF3D7_1441400	59 kDa	1	0	0	2
210	Prolyl-tRNA synthetase OS=Plasmodium falciparum (isolate 3D7) OX=36329 GN=PF3D7_1213800 PE=3 SV=1	A0A144A0G8	PF3D7_1213800	87 kDa	0	0	0	5
211	Tetratricopeptide repeat protein, putative OS=Plasmodium falciparum (isolate 3D7) OX=36329 GN=PF3D7_1205600 PE=4 SV=1	Q8I5Y9	PF3D7_1205600	39 kDa	2	0	0	4
212	Ethanolamine kinase OS=Plasmodium falciparum (isolate 3D7) OX=36329 GN=PF3D7_1124600 PE=4 SV=1	Q8IIB7	PF3D7_1124600	50 kDa	1	0	0	5
213	Non-SERCA-type Ca2+ -transporting P-ATPase OS=Plasmodium falciparum (isolate 3D7) OX=36329 GN=PF3D7_1211900 PE=4 SV=1	A0A143ZZK9	PF3D7_1211900	140 kDa	0	0	0	4
214	1-cys peroxiredoxin OS=Plasmodium falciparum (isolate 3D7) OX=36329 GN=PF3D7_0802200 PE=3 SV=1	Q8IAM2	PF3D7_0802200	25 kDa	0	0	0	5
215	Proliferation-associated protein 2g4, putative OS=Plasmodium falciparum (isolate 3D7) OX=36329 GN=PF3D7_1428300 PE=3 SV=1	Q8ILI2	PF3D7_1428300	43 kDa	1	0	1	2
216	Uncharacterized protein OS=Plasmodium falciparum (isolate 3D7) OX=36329 GN=PF3D7_1002900 PE=4 SV=2	Q8IK07	PF3D7_1002900	15 kDa	0	1	0	3
217	T-complex protein 1 subunit epsilon OS=Plasmodium falciparum (isolate 3D7) OX=36329 GN=PF3D7_0320300 PE=3 SV=1	O97282	PF3D7_0320300	59 kDa	1	0	0	2
218	RNA-binding protein, putative OS=Plasmodium falciparum (isolate 3D7) OX=36329 GN=PF3D7_1004400 PE=4 SV=1	Q8IJZ3	PF3D7_1004400	106 kDa	1	1	0	3
219	Calcyclin-binding protein OS=Plasmodium falciparum (isolate 3D7) OX=36329 GN=PF3D7_1238100 PE=4 SV=2	Q8I542	PF3D7_1238100	27 kDa	3	0	1	1
220	Ras-related protein Rab-11A OS=Plasmodium falciparum (isolate 3D7) OX=36329 GN=PF3D7_1320600 PE=1 SV=1	Q76NM4	PF3D7_1320600	25 kDa	3	1	0	1
221	Transcriptional coactivator ADA2 OS=Plasmodium falciparum (isolate 3D7) OX=36329 GN=PF3D7_1014600 PE=4 SV=1	Q8IJP9	PF3D7_1014600	300 kDa	0	0	2	2
222	Kelch domain-containing protein, putative OS=Plasmodium falciparum (isolate 3D7) OX=36329 GN=PF3D7_1468100 PE=4 SV=1	Q8IKF6	PF3D7_1468100	296 kDa	5	1	0	1
223	Nucleoporin NUP116/NSP116, putative OS=Plasmodium falciparum (isolate 3D7) OX=36329 GN=PF3D7_1473700 PE=4 SV=1	Q8IKA0	PF3D7_1473700	142 kDa	3	0	1	1
224	Dynamin-like protein OS=Plasmodium falciparum (isolate 3D7) OX=36329 GN=PF3D7_1145400 PE=3 SV=1	Q8IHR4	PF3D7_1145400	96 kDa	3	0	0	2
225	60S ribosomal protein L22, putative OS=Plasmodium falciparum (isolate 3D7) OX=36329 GN=PF3D7_0821700 PE=1 SV=1	Q8IB51	PF3D7_0821700	16 kDa	2	0	3	2
226	Small heat shock protein, putative OS=Plasmodium falciparum (isolate 3D7) OX=36329 GN=PF3D7_1304500 PE=3 SV=1	Q8IES0	PF3D7_1304500	25 kDa	3	0	2	1
227	Uncharacterized protein OS=Plasmodium falciparum (isolate 3D7) OX=36329 GN=PF3D7_1328300 PE=4 SV=1	Q8IE43	PF3D7_1328300	39 kDa	2	0	0	3
228	Ribonucleoside-diphosphate reductase small chain, putative OS=Plasmodium falciparum (isolate 3D7) OX=36329 GN=PF3D7_1405600 PE=3 SV=1	Q8IM38	PF3D7_1405600	41 kDa	0	0	0	2
229	DnaJ protein, putative OS=Plasmodium falciparum (isolate 3D7) OX=36329 GN=PF3D7_1473200 PE=4 SV=1	Q8IKA6	PF3D7_1473200	52 kDa	1	0	0	2
230	Casein kinase I OS=Plasmodium falciparum (isolate 3D7) OX=36329 GN=PF3D7_1136500.1 PE=3 SV=1	A0A144A308 (+1)	PF3D7_1136500	38 kDa	2	1	1	0
231	Chromodomain-helicase-DNA-binding protein 1 homolog, putative OS=Plasmodium falciparum (isolate 3D7) OX=36329 GN=PF3D7_1023900 PE=4 SV=1	Q8IJG6	PF3D7_1023900	381 kDa	0	1	1	3
232	Transformer-2 protein homolog beta, putative OS=Plasmodium falciparum (isolate 3D7) OX=36329 GN=PF3D7_1002400.1 PE=4 SV=1	Q8IK12	PF3D7_1002400	30 kDa	0	1	1	2
233	Uncharacterized protein OS=Plasmodium falciparum (isolate 3D7) OX=36329 GN=PF3D7_0210900 PE=4 SV=1	O96191	PF3D7_0210900	33 kDa	1	1	0	3
234	Aspartyl-tRNA synthetase OS=Plasmodium falciparum (isolate 3D7) OX=36329 GN=PF3D7_0102900 PE=3 SV=1	Q8I2B1	PF3D7_0102900	73 kDa	1	0	1	3
235	Cation transporting ATPase, putative OS=Plasmodium falciparum (isolate 3D7) OX=36329 GN=PF3D7_0727800 PE=4 SV=1	Q8IBH9	PF3D7_0727800	225 kDa	2	1	0	1
236	Uncharacterized protein OS=Plasmodium falciparum (isolate 3D7) OX=36329 GN=PF3D7_1435600 PE=4 SV=1	Q8ILA8	PF3D7_1435600	211 kDa	6	0	0	0
237	Hsc70-interacting protein OS=Plasmodium falciparum (isolate 3D7) OX=36329 GN=PF3D7_0527500 PE=3 SV=1	Q8I3J0	PF3D7_0527500	51 kDa	2	0	0	1
238	SNF2 helicase, putative OS=Plasmodium falciparum (isolate 3D7) OX=36329 GN=PF3D7_0624600 PE=4 SV=1	C6KT82	PF3D7_0624600	316 kDa	0	0	0	4
239	H(+)-exporting diphosphatase OS=Plasmodium falciparum (isolate 3D7) OX=36329 GN=PF3D7_1456800 PE=3 SV=1	Q8IKR1	PF3D7_1456800	76 kDa	0	0	1	3
240	Protein kinase, putative OS=Plasmodium falciparum (isolate 3D7) OX=36329 GN=PF3D7_0926100 PE=4 SV=1	Q8I2P8	PF3D7_0926100	367 kDa	2	0	0	0
241	Falcilysin OS=Plasmodium falciparum (isolate 3D7) OX=36329 GN=PF3D7_1360800 PE=1 SV=1	Q76NL8	PF3D7_1360800	139 kDa	0	0	0	5
242	Casein kinase 2, alpha subunit OS=Plasmodium falciparum (isolate 3D7) OX=36329 GN=PF3D7_1108400 PE=1 SV=1	Q8IIR9	PF3D7_1108400	40 kDa	0	0	0	3
243	Chromatin remodeling protein OS=Plasmodium falciparum (isolate 3D7) OX=36329 GN=PF3D7_1104200 PE=4 SV=1	Q8IIW0	PF3D7_1104200	167 kDa	0	0	0	2
244	DNA helicase OS=Plasmodium falciparum (isolate 3D7) OX=36329 GN=PF3D7_1355100 PE=3 SV=1	Q8IDF0	PF3D7_1355100	106 kDa	2	0	0	2
245	Ras-related protein Rab-11B OS=Plasmodium falciparum (isolate 3D7) OX=36329 GN=PF3D7_1340700 PE=4 SV=2	C0H5G2	PF3D7_1340700	26 kDa	4	1	0	0
246	Heat shock protein 90, putative OS=Plasmodium falciparum (isolate 3D7) OX=36329 GN=PF3D7_1118200 PE=3 SV=1	Q8III6	PF3D7_1118200	108 kDa	0	0	0	5
247	Adenosylhomocysteinase OS=Plasmodium falciparum (isolate 3D7) OX=36329 GN=PFE1050w PE=1 SV=2	P50250	PFE1050w	54 kDa	0	0	0	3
248	60S ribosomal protein L37ae, putative OS=Plasmodium falciparum (isolate 3D7) OX=36329 GN=PF3D7_0210100.1 PE=3 SV=1	A0A143ZYX3	PF3D7_0210100	11 kDa	1	1	1	2
249	Nuclear cap-binding protein subunit 2 OS=Plasmodium falciparum (isolate 3D7) OX=36329 GN=PF3D7_0415500 PE=3 SV=1	Q8I1T2	PF3D7_0415500	28 kDa	0	1	1	2
250	Uncharacterized protein OS=Plasmodium falciparum (isolate 3D7) OX=36329 GN=PF3D7_0108300 PE=4 SV=2	Q8I259	PF3D7_0108300	255 kDa	2	0	0	1
251	CUGBP Elav-like family member 2, putative OS=Plasmodium falciparum (isolate 3D7) OX=36329 GN=PF3D7_1409800 PE=4 SV=1	Q8ILZ7	PF3D7_1409800	59 kDa	2	0	0	1
252	Phosphoribosylpyrophosphate synthetase OS=Plasmodium falciparum (isolate 3D7) OX=36329 GN=PF3D7_1325100 PE=3 SV=1	Q8IE67	PF3D7_1325100	49 kDa	0	2	0	2
253	Eukaryotic translation initiation factor 2 subunit alpha OS=Plasmodium falciparum (isolate 3D7) OX=36329 GN=PF3D7_0728000 PE=3 SV=1	Q8IBH7	PF3D7_0728000	38 kDa	1	0	0	2
254	T-complex protein 1 subunit eta OS=Plasmodium falciparum (isolate 3D7) OX=36329 GN=MAL3P3.6 PE=3 SV=1	O77323	MAL3P3	60 kDa	0	0	0	4
255	M17 leucyl aminopeptidase OS=Plasmodium falciparum (isolate 3D7) OX=36329 GN=PF3D7_1446200 PE=1 SV=1	Q8IL11	PF3D7_1446200	68 kDa	0	0	1	4
256	Eukaryotic translation initiation factor 3 subunit E OS=Plasmodium falciparum (isolate 3D7) OX=36329 GN=PF3D7_0528200 PE=3 SV=1	Q8I3I5	PF3D7_0528200	61 kDa	1	0	0	2
257	Profilin OS=Plasmodium falciparum (isolate 3D7) OX=36329 GN=Pfn PE=3 SV=1	Q8I2J4	Pfn	19 kDa	1	1	0	2
258	FoP domain-containing protein, putative OS=Plasmodium falciparum (isolate 3D7) OX=36329 GN=PF3D7_0519700 PE=4 SV=1	C0H4F1	PF3D7_0519700	23 kDa	0	0	2	1
259	tRNA import protein tRIP OS=Plasmodium falciparum (isolate 3D7) OX=36329 GN=PF3D7_1442300 PE=4 SV=1	Q8IL48	PF3D7_1442300	46 kDa	0	1	0	2
260	Eukaryotic translation initation factor 4 gamma OS=Plasmodium falciparum (isolate 3D7) OX=36329 GN=PF3D7_1312900 PE=4 SV=1	C0H5B1	PF3D7_1312900	147 kDa	0	0	0	2
261	Glutamate dehydrogenase, putative OS=Plasmodium falciparum (isolate 3D7) OX=36329 GN=PF3D7_0802000 PE=3 SV=1	Q8IAM0	PF3D7_0802000	160 kDa	0	1	0	2
262	Heterochromatin protein 1 OS=Plasmodium falciparum (isolate 3D7) OX=36329 GN=PF3D7_1220900 PE=1 SV=1	Q8I5K4	PF3D7_1220900	31 kDa	0	0	0	4
263	RNA-binding protein musashi, putative OS=Plasmodium falciparum (isolate 3D7) OX=36329 GN=PF3D7_0916700 PE=4 SV=1	Q8I2Y5	PF3D7_0916700	45 kDa	1	0	0	3
264	Protein DJ-1 OS=Plasmodium falciparum (isolate 3D7) OX=36329 GN=PF3D7_0627500 PE=4 SV=1	C6KTB1	PF3D7_0627500	20 kDa	1	0	0	4
265	Ubiquitin-activating enzyme E1 OS=Plasmodium falciparum (isolate 3D7) OX=36329 GN=PF3D7_1225800 PE=3 SV=1	Q8I5F9	PF3D7_1225800	132 kDa	0	0	0	3
266	Asparagine--tRNA ligase OS=Plasmodium falciparum (isolate 3D7) OX=36329 GN=PF3D7_0211800 PE=3 SV=1	O96198	PF3D7_0211800	71 kDa	0	0	0	4
267	Protein CINCH OS=Plasmodium falciparum (isolate 3D7) OX=36329 GN=PF3D7_0407800 PE=4 SV=1	Q9U0K8	PF3D7_0407800	230 kDa	2	0	0	0
268	Nascent polypeptide-associated complex subunit beta OS=Plasmodium falciparum (isolate 3D7) OX=36329 GN=PF3D7_1426100 PE=3 SV=1	Q8ILK2	PF3D7_1426100	19 kDa	0	0	1	2
269	Uncharacterized protein OS=Plasmodium falciparum (isolate 3D7) OX=36329 GN=PF3D7_1014900 PE=4 SV=1	Q8IJP6	PF3D7_1014900	268 kDa	2	1	0	0
270	PHAX domain-containing protein, putative OS=Plasmodium falciparum (isolate 3D7) OX=36329 GN=PF3D7_1021900 PE=4 SV=1	Q8IJI4	PF3D7_1021900	267 kDa	0	0	0	2
271	Replication factor C subunit 2, putative OS=Plasmodium falciparum (isolate 3D7) OX=36329 GN=PF3D7_0218000 PE=3 SV=1	O96260	PF3D7_0218000	38 kDa	1	2	0	2
272	26S proteasome regulatory subunit RPN2, putative OS=Plasmodium falciparum (isolate 3D7) OX=36329 GN=PF3D7_1466300 PE=3 SV=1	Q8IKH3	PF3D7_1466300	133 kDa	1	0	1	2
273	Autophagy-related protein 18 OS=Plasmodium falciparum (isolate 3D7) OX=36329 GN=PF3D7_1012900 PE=4 SV=1	Q8IJR6	PF3D7_1012900	44 kDa	0	0	0	2
274	Chaperone protein ClpB1 OS=Plasmodium falciparum (isolate 3D7) OX=36329 GN=PF3D7_0816600 PE=1 SV=1	Q8IB03	PF3D7_0816600	123 kDa	0	0	0	2
275	Signal recognition particle receptor subunit beta OS=Plasmodium falciparum (isolate 3D7) OX=36329 GN=PF3D7_1246800 PE=3 SV=1	Q8I4W4	PF3D7_1246800	31 kDa	2	0	0	2
276	PRESAN domain-containing protein OS=Plasmodium falciparum (isolate 3D7) OX=36329 GN=PF3D7_0401800 PE=4 SV=1	Q8I207	PF3D7_0401800	60 kDa	1	0	0	3
277	Threonyl-tRNA synthetase OS=Plasmodium falciparum (isolate 3D7) OX=36329 GN=PF3D7_1126000 PE=3 SV=1	Q8IIA4	PF3D7_1126000	120 kDa	0	0	0	2
278	Endoplasmic reticulum chaperone GRP170 OS=Plasmodium falciparum (isolate 3D7) OX=36329 GN=PF3D7_1344200 PE=4 SV=1	C0H5H0	PF3D7_1344200	108 kDa	0	0	0	3
279	Eukaryotic translation initiation factor 2 subunit beta OS=Plasmodium falciparum (isolate 3D7) OX=36329 GN=PF3D7_1010600 PE=3 SV=1	Q8IJT9	PF3D7_1010600	25 kDa	2	0	0	3
280	Proteasome subunit alpha type-1, putative OS=Plasmodium falciparum (isolate 3D7) OX=36329 GN=PF3D7_1474800 PE=1 SV=1	Q8IK90	PF3D7_1474800	29 kDa	1	0	0	3
281	Serine/arginine-rich splicing factor 1 OS=Plasmodium falciparum (isolate 3D7) OX=36329 GN=PF3D7_0517300 PE=1 SV=2	Q8I3T5	PF3D7_0517300	35 kDa	2	0	2	0
282	Autophagy-related protein 23, putative OS=Plasmodium falciparum (isolate 3D7) OX=36329 GN=PF3D7_1126700 PE=4 SV=2	Q8II97	PF3D7_1126700	110 kDa	1	2	0	0
283	60S acidic ribosomal protein P2 OS=Plasmodium falciparum (isolate 3D7) OX=36329 GN=MAL3P3.19 PE=3 SV=1	O00806	MAL3P3	12 kDa	1	0	0	4
284	AAA family ATPase, putative OS=Plasmodium falciparum (isolate 3D7) OX=36329 GN=PF3D7_0707400 PE=4 SV=1	C0H4M1	PF3D7_0707400	78 kDa	0	0	0	2
285	60S acidic ribosomal protein P1, putative OS=Plasmodium falciparum (isolate 3D7) OX=36329 GN=PF3D7_1103100 PE=3 SV=1	Q8IIX0	PF3D7_1103100	13 kDa	0	0	0	3
286	Casein kinase II subunit beta OS=Plasmodium falciparum (isolate 3D7) OX=36329 GN=PF3D7_1342400 PE=3 SV=1	Q8IDR5	PF3D7_1342400	45 kDa	1	0	0	2
287	DnaJ protein, putative OS=Plasmodium falciparum (isolate 3D7) OX=36329 GN=PF3D7_0919100 PE=4 SV=1	Q8I2W2	PF3D7_0919100	43 kDa	0	0	0	4
288	Lysine-rich membrane-associated PHISTb protein OS=Plasmodium falciparum (isolate 3D7) OX=36329 GN=PF3D7_0532400 PE=4 SV=1	Q8I3F0	PF3D7_0532400	61 kDa	0	0	0	4
289	DNA topoisomerase 2 OS=Plasmodium falciparum (isolate 3D7) OX=36329 GN=PF3D7_1433500 PE=3 SV=1	Q8ILC8	PF3D7_1433500	169 kDa	0	0	0	2
290	RuvB-like helicase OS=Plasmodium falciparum (isolate 3D7) OX=36329 GN=PF3D7_1106000 PE=3 SV=1	Q8IIU3	PF3D7_1106000	53 kDa	1	0	0	2
291	Coatomer subunit beta, putative OS=Plasmodium falciparum (isolate 3D7) OX=36329 GN=PF3D7_1429800 PE=4 SV=2	Q8ILG6	PF3D7_1429800	160 kDa	1	0	0	2
292	Multidrug resistance protein 2 OS=Plasmodium falciparum (isolate 3D7) OX=36329 GN=PF3D7_1447900 PE=4 SV=1	Q8IKZ6	PF3D7_1447900	119 kDa	2	0	0	1
293	Protein disulfide isomerase OS=Plasmodium falciparum (isolate 3D7) OX=36329 GN=PF3D7_1134100 PE=4 SV=1	Q8II23	PF3D7_1134100	49 kDa	1	0	1	2
294	MA3 domain-containing protein, putative OS=Plasmodium falciparum (isolate 3D7) OX=36329 GN=PF3D7_1457300 PE=3 SV=1	Q8IKQ7	PF3D7_1457300	76 kDa	2	0	0	2
295	Uncharacterized protein OS=Plasmodium falciparum (isolate 3D7) OX=36329 GN=PF3D7_0821000 PE=4 SV=1	Q8IB44	PF3D7_0821000	61 kDa	2	0	0	1
296	PRESAN domain-containing protein OS=Plasmodium falciparum (isolate 3D7) OX=36329 GN=PF3D7_0424600 PE=4 SV=1	Q8IFM0	PF3D7_0424600	36 kDa	2	0	1	0
297	Protein SEY1 homolog OS=Plasmodium falciparum (isolate 3D7) OX=36329 GN=PF3D7_1416100 PE=3 SV=1	A0A144A1B3	PF3D7_1416100	111 kDa	2	0	0	2
298	Translocation protein SEC63, putative OS=Plasmodium falciparum (isolate 3D7) OX=36329 GN=PF3D7_1318800 PE=4 SV=1	Q8IEC8	PF3D7_1318800	76 kDa	0	0	0	2
299	Uncharacterized protein OS=Plasmodium falciparum (isolate 3D7) OX=36329 GN=PF3D7_0831400 PE=4 SV=1	C0H4Z7	PF3D7_0831400	36 kDa	1	0	0	2
300	Surface protein P113 OS=Plasmodium falciparum (isolate 3D7) OX=36329 GN=P113 PE=1 SV=1	Q8ILP3	P113	113 kDa	0	0	0	2
301	Eukaryotic translation initiation factor 4E OS=Plasmodium falciparum (isolate 3D7) OX=36329 GN=PF3D7_0315100 PE=3 SV=1	O97266	PF3D7_0315100	27 kDa	0	0	0	2
302	Aminopeptidase P OS=Plasmodium falciparum (isolate 3D7) OX=36329 GN=PF3D7_1454400 PE=3 SV=1	A0A144A2H0	PF3D7_1454400	90 kDa	0	0	0	2
303	Thioredoxin peroxidase 1 OS=Plasmodium falciparum (isolate 3D7) OX=36329 GN=PF3D7_1438900 PE=3 SV=1	Q8IL80	PF3D7_1438900	22 kDa	0	0	0	2
304	Adenosine deaminase OS=Plasmodium falciparum (isolate 3D7) OX=36329 GN=ADA PE=1 SV=1	Q8IJA9	ADA	42 kDa	0	0	0	3
305	Dicarboxylate/tricarboxylate carrier OS=Plasmodium falciparum (isolate 3D7) OX=36329 GN=PF3D7_0823900 PE=3 SV=1	Q8IB73	PF3D7_0823900	35 kDa	1	0	0	2
306	NTF2 domain-containing protein OS=Plasmodium falciparum (isolate 3D7) OX=36329 GN=PF3D7_1423700 PE=4 SV=1	Q8ILL5	PF3D7_1423700	184 kDa	1	0	0	2
307	Insulinase, putative OS=Plasmodium falciparum (isolate 3D7) OX=36329 GN=PF3D7_1118300 PE=4 SV=1	Q8III5	PF3D7_1118300	174 kDa	0	0	0	2
308	Exportin-7, putative OS=Plasmodium falciparum (isolate 3D7) OX=36329 GN=PF3D7_0910100 PE=4 SV=1	C0H530	PF3D7_0910100	139 kDa	1	0	0	2
309	ATP-dependent RNA helicase DDX6 OS=Plasmodium falciparum (isolate 3D7) OX=36329 GN=PF3D7_0320800 PE=3 SV=1	O97285	PF3D7_0320800	49 kDa	0	1	0	2
310	Glycogen synthase kinase 3 OS=Plasmodium falciparum (isolate 3D7) OX=36329 GN=PF3D7_0312400 PE=3 SV=2	O77344	PF3D7_0312400	52 kDa	1	0	0	2
311	YOP1-like protein, putative OS=Plasmodium falciparum (isolate 3D7) OX=36329 GN=PF3D7_1358700 PE=3 SV=1	Q8IDB8	PF3D7_1358700	18 kDa	0	0	0	2
312	V-type proton ATPase subunit a, putative OS=Plasmodium falciparum (isolate 3D7) OX=36329 GN=PF3D7_0806800 PE=3 SV=1	Q8IAQ8	PF3D7_0806800	123 kDa	0	0	0	2
313	Heat shock protein 60 OS=Plasmodium falciparum (isolate 3D7) OX=36329 GN=PF3D7_1015600 PE=3 SV=1	Q8IJN9	PF3D7_1015600	63 kDa	0	0	0	2
314	Uncharacterized protein OS=Plasmodium falciparum (isolate 3D7) OX=36329 GN=PF3D7_0813400 PE=4 SV=1	C0H4U5	PF3D7_0813400	77 kDa	0	0	0	2
315	Eukaryotic translation initiation factor 3 subunit F, putative OS=Plasmodium falciparum (isolate 3D7) OX=36329 GN=PF3D7_0918300 PE=4 SV=1	Q8I2X0	PF3D7_0918300	37 kDa	0	0	0	2
316	Haloacid dehalogenase-like hydrolase OS=Plasmodium falciparum (isolate 3D7) OX=36329 GN=PF3D7_1033400 PE=1 SV=1	Q8IJ74	PF3D7_1033400	33 kDa	0	0	0	2
317	PRESAN domain-containing protein OS=Plasmodium falciparum (isolate 3D7) OX=36329 GN=PF3D7_0532300 PE=4 SV=1	Q8I3F1	PF3D7_0532300	60 kDa	0	0	0	2
318	Importin subunit beta, putative OS=Plasmodium falciparum (isolate 3D7) OX=36329 GN=PF3D7_0815200 PE=4 SV=1	Q8IAY9	PF3D7_0815200	100 kDa	0	0	0	2
319	Serine-repeat antigen protein 5 OS=Plasmodium falciparum (isolate 3D7) OX=36329 GN=SERA5 PE=1 SV=1	Q9TY95	SERA5	112 kDa	0	0	0	3
320	ATP-dependent RNA helicase DDX60, putative OS=Plasmodium falciparum (isolate 3D7) OX=36329 GN=PF3D7_0903400 PE=4 SV=1	Q8I3B4	PF3D7_0903400	301 kDa	0	0	0	2
321	GTP-binding protein, putative OS=Plasmodium falciparum (isolate 3D7) OX=36329 GN=PF3D7_1462300 PE=4 SV=1	Q8IKL1	PF3D7_1462300	161 kDa	0	0	0	2
322	Structural maintenance of chromosomes protein 1, putative OS=Plasmodium falciparum (isolate 3D7) OX=36329 GN=PF3D7_1130700 PE=4 SV=1	Q8II57	PF3D7_1130700	215 kDa	0	0	0	2
323	Valyl-tRNA synthetase OS=Plasmodium falciparum (isolate 3D7) OX=36329 GN=PF3D7_1461900 PE=3 SV=1	Q8IKL5	PF3D7_1461900	128 kDa	0	0	0	2
324	Hypoxanthine phosphoribosyltransferase OS=Plasmodium falciparum (isolate 3D7) OX=36329 GN=PF3D7_1012400 PE=3 SV=1	Q8IJS1	PF3D7_1012400	26 kDa	0	0	0	2
325	26S proteasome regulatory subunit RPN3, putative OS=Plasmodium falciparum (isolate 3D7) OX=36329 GN=PF3D7_1338100 PE=3 SV=1	A0A5K1K9F3	PF3D7_1338100	59 kDa	0	0	0	2
326	RNA (Uracil-5-)methyltransferase, putative OS=Plasmodium falciparum (isolate 3D7) OX=36329 GN=PF3D7_1133800 PE=3 SV=2	Q8II27	PF3D7_1133800	102 kDa	0	0	0	2
327	Tubulin gamma chain OS=Plasmodium falciparum (isolate 3D7) OX=36329 GN=PF3D7_0803700 PE=3 SV=1	Q8IAN7	PF3D7_0803700	52 kDa	0	0	0	2
328	Inositol-3-phosphate synthase OS=Plasmodium falciparum (isolate 3D7) OX=36329 GN=PF3D7_0511800 PE=3 SV=1	Q8I3Y8	PF3D7_0511800	69 kDa	0	0	0	2
329	Ribonucleoside-diphosphate reductase small chain, putative OS=Plasmodium falciparum (isolate 3D7) OX=36329 GN=PF3D7_1015800 PE=3 SV=2	Q8IJN8	PF3D7_1015800	40 kDa	0	0	0	2
330	Uncharacterized protein OS=Plasmodium falciparum (isolate 3D7) OX=36329 GN=PF3D7_0702500 PE=4 SV=1	Q8IC42	PF3D7_0702500	28 kDa	0	0	0	2
331	Tyrosine--tRNA ligase OS=Plasmodium falciparum (isolate 3D7) OX=36329 GN=PF3D7_0807900 PE=1 SV=1	Q8IAR7	PF3D7_0807900	43 kDa	0	0	0	2
END OF FILE

## Sheet: PCA analysis
Identified Proteins	Alternate ID	PC1	PC2
Heat shock protein 70 OS=Plasmodium falciparum (isolate 3D7) OX=36329 GN=PF3D7_0818900 PE=3 SV=1	PF3D7_0818900	11.603343569156568	-3.00076
Uncharacterized protein OS=Plasmodium falciparum (isolate 3D7) OX=36329 GN=PF3D7_0613600 PE=4 SV=1	PF3D7_0613600	11.088962425868274	11.315855584401783
Elongation factor 1-alpha OS=Plasmodium falciparum (isolate 3D7) OX=36329 GN=PF3D7_1357000 PE=3 SV=1	PF3D7_1357000	9.567	-1.17858		The PCA analysis for the BioID dataset is complete. The variance explained by:
Heat shock protein 90 OS=Plasmodium falciparum (isolate 3D7) OX=36329 GN=PF3D7_0708400 PE=1 SV=1	PF3D7_0708400	10.89362900067017	-2.97609
Dynamin-like protein OS=Plasmodium falciparum (isolate 3D7) OX=36329 GN=PF3D7_1037500 PE=4 SV=1	PF3D7_1037500	8.974669419598175	9.391488586943545		PC1 is 68.96%
Heat shock protein 70 OS=Plasmodium falciparum (isolate 3D7) OX=36329 GN=PF3D7_0917900 PE=3 SV=1	PF3D7_0917900	6.2280816224475055	-2.85199		PC2 is 25.15%
Polyadenylate-binding protein OS=Plasmodium falciparum (isolate 3D7) OX=36329 GN=PF3D7_1224300 PE=3 SV=1	PF3D7_1224300	4.696957101247375	-3.28456
Endoplasmin, putative OS=Plasmodium falciparum (isolate 3D7) OX=36329 GN=PF3D7_1222300 PE=1 SV=1	PF3D7_1222300	4.361754210398963	-1.89208
Pyruvate kinase OS=Plasmodium falciparum (isolate 3D7) OX=36329 GN=PF3D7_0626800 PE=1 SV=1	PF3D7_0626800	4.742566127931002	-2.64213
Glyceraldehyde-3-phosphate dehydrogenase OS=Plasmodium falciparum (isolate 3D7) OX=36329 GN=PF3D7_1462800 PE=3 SV=1	PF3D7_1462800	3.878981532227298	-1.74405
Elongation factor 2 OS=Plasmodium falciparum (isolate 3D7) OX=36329 GN=PF3D7_1451100 PE=3 SV=1	PF3D7_1451100	2.996583701646844	-1.40473
Actin, cytoplasmic 2 OS=Homo sapiens OX=9606 GN=ACTG1 PE=1 SV=9	ACTG1	3.644578534019515	-0.976009
Actin I OS=Plasmodium falciparum (isolate 3D7) OX=36329 GN=PF3D7_1246200 PE=3 SV=1	PF3D7_1246200	2.8735401917573697	0.4932960340909778
S-adenosylmethionine synthase OS=Plasmodium falciparum (isolate 3D7) OX=36329 GN=PF3D7_0922200 PE=3 SV=1	PF3D7_0922200	2.593752795807075	-0.2799
Phosphoglycerate kinase OS=Plasmodium falciparum (isolate 3D7) OX=36329 GN=PGK PE=1 SV=1	PGK	3.09203	0.17333759081419428
40S ribosomal protein S3 OS=Plasmodium falciparum (isolate 3D7) OX=36329 GN=PF3D7_1465900 PE=1 SV=1	PF3D7_1465900	2.3366741224350394	-0.336457
GTP-binding nuclear protein OS=Plasmodium falciparum (isolate 3D7) OX=36329 GN=PF3D7_1117700 PE=3 SV=1	PF3D7_1117700	2.8220350109220145	-0.295558
High molecular weight rhoptry protein 2 OS=Plasmodium falciparum (isolate 3D7) OX=36329 GN=PF3D7_0929400 PE=4 SV=1	PF3D7_0929400	2.1830790394674713	-0.0805757
40S ribosomal protein S4 OS=Plasmodium falciparum (isolate 3D7) OX=36329 GN=PF3D7_1105400 PE=1 SV=2	PF3D7_1105400	2.6006924546630366	-1.5876
60S ribosomal protein L4 OS=Plasmodium falciparum (isolate 3D7) OX=36329 GN=PF3D7_0507100 PE=1 SV=1	PF3D7_0507100	2.323067307439491	-1.84022
Histone H4 OS=Plasmodium falciparum (isolate 3D7) OX=36329 GN=PF3D7_1105000 PE=3 SV=1	PF3D7_1105000	2.333465320840633	-0.61782
Dynamin-like protein, putative OS=Plasmodium falciparum (isolate 3D7) OX=36329 GN=PF3D7_1218500 PE=4 SV=1	PF3D7_1218500	2.0064753656622485	-3.07135
Eukaryotic initiation factor 4A OS=Plasmodium falciparum (isolate 3D7) OX=36329 GN=PF3D7_1468700 PE=3 SV=1	PF3D7_1468700	1.9031782815439726	0.2957748982077217
60S ribosomal protein L3 OS=Plasmodium falciparum (isolate 3D7) OX=36329 GN=PF3D7_1027800 PE=1 SV=1	PF3D7_1027800	1.8564205115872523	-0.998482
Phosphoethanolamine N-methyltransferase OS=Plasmodium falciparum (isolate 3D7) OX=36329 GN=PF3D7_1343000 PE=4 SV=1	PF3D7_1343000	2.014714178500066	-1.15461
60S ribosomal protein L5, putative OS=Plasmodium falciparum (isolate 3D7) OX=36329 GN=PF3D7_1424100 PE=1 SV=1	PF3D7_1424100	1.5492130777574962	-0.875958
40S ribosomal protein S3a OS=Plasmodium falciparum (isolate 3D7) OX=36329 GN=MAL3P7.35 PE=1 SV=1	MAL3P7	1.5784024501891498	-1.02742
Ornithine aminotransferase OS=Plasmodium falciparum (isolate 3D7) OX=36329 GN=OAT PE=1 SV=1	OAT	1.2044340974344843	-0.0462914
Histone H2B OS=Plasmodium falciparum (isolate 3D7) OX=36329 GN=PF3D7_1105100 PE=3 SV=1	PF3D7_1105100	1.20846	-0.320248
60S ribosomal protein L7, putative OS=Plasmodium falciparum (isolate 3D7) OX=36329 GN=PF3D7_0307200 PE=1 SV=2	PF3D7_0307200	0.35129173411369286	-0.0743541
Probable ATP-dependent 6-phosphofructokinase OS=Plasmodium falciparum (isolate 3D7) OX=36329 GN=PF3D7_0915400 PE=3 SV=1	PF3D7_0915400	0.862927	-0.36609
14-3-3 protein OS=Plasmodium falciparum (isolate 3D7) OX=36329 GN=PF3D7_0818200 PE=3 SV=1	PF3D7_0818200	1.5535345270475682	-1.04972
PRE-binding protein OS=Plasmodium falciparum (isolate 3D7) OX=36329 GN=PF3D7_1011800 PE=4 SV=1	PF3D7_1011800	1.1031600229019636	-0.771787
L-lactate dehydrogenase OS=Plasmodium falciparum (isolate 3D7) OX=36329 GN=PF3D7_1324900 PE=1 SV=1	PF3D7_1324900	0.9564242842311542	-0.782016
Fructose-bisphosphate aldolase OS=Plasmodium falciparum (isolate 3D7) OX=36329 GN=PF3D7_1444800 PE=3 SV=1	PF3D7_1444800	1.218577187828374	-1.23863
Protein disulfide-isomerase OS=Plasmodium falciparum (isolate 3D7) OX=36329 GN=PF3D7_0827900 PE=3 SV=1	PF3D7_0827900	0.4584070395377034	-1.0271
60S ribosomal protein L10, putative OS=Plasmodium falciparum (isolate 3D7) OX=36329 GN=PF3D7_1414300 PE=1 SV=1	PF3D7_1414300	1.1478546863739463	-0.321978
40S ribosomal protein S8 OS=Plasmodium falciparum (isolate 3D7) OX=36329 GN=PF3D7_1408600 PE=1 SV=1	PF3D7_1408600	1.4421450394786832	-0.85684
Heat shock protein 110 OS=Plasmodium falciparum (isolate 3D7) OX=36329 GN=PF3D7_0708800 PE=4 SV=1	PF3D7_0708800	0.6080105407251749	0.0979266
Mini-chromosome maintenance complex-binding protein, putative OS=Plasmodium falciparum (isolate 3D7) OX=36329 GN=PF3D7_1412100 PE=4 SV=1	PF3D7_1412100	0.837622	1.9838351059947066
40S ribosomal protein S11 OS=Plasmodium falciparum (isolate 3D7) OX=36329 GN=PF3D7_0516200 PE=3 SV=1	PF3D7_0516200	1.0379046658472773	-0.591988
DNA/RNA-binding protein Alba 1 OS=Plasmodium falciparum (isolate 3D7) OX=36329 GN=PF3D7_0814200 PE=4 SV=1	PF3D7_0814200	0.7508507916944729	-0.0497191
Histone H3 OS=Plasmodium falciparum (isolate 3D7) OX=36329 GN=PF3D7_0610400 PE=3 SV=1	PF3D7_0610400	0.7679089117502221	-1.06088
DNA helicase OS=Plasmodium falciparum (isolate 3D7) OX=36329 GN=PF3D7_1211700 PE=3 SV=1	PF3D7_1211700	-0.304983	0.9436432858033809
60S ribosomal protein L27a, putative OS=Plasmodium falciparum (isolate 3D7) OX=36329 GN=PF3D7_0618300 PE=1 SV=1	PF3D7_0618300	1.3238789397184203	-0.787087
ATP-dependent RNA helicase UAP56 OS=Plasmodium falciparum (isolate 3D7) OX=36329 GN=PF3D7_0209800 PE=4 SV=1	PF3D7_0209800	1.0280830247434602	0.4265831427774141
Tubulin alpha chain OS=Plasmodium falciparum (isolate 3D7) OX=36329 GN=PF3D7_0903700 PE=3 SV=1	PF3D7_0903700	0.647711	0.019315674286682637
Receptor for activated c kinase OS=Plasmodium falciparum (isolate 3D7) OX=36329 GN=PF3D7_0826700 PE=4 SV=1	PF3D7_0826700	0.49334615673387594	0.2253617333994295
40S ribosomal protein S9, putative OS=Plasmodium falciparum (isolate 3D7) OX=36329 GN=PF3D7_0520000 PE=1 SV=1	PF3D7_0520000	1.238044061398221	-0.695393
60S ribosomal protein L17, putative OS=Plasmodium falciparum (isolate 3D7) OX=36329 GN=PF3D7_1351400 PE=1 SV=1	PF3D7_1351400	1.0379046658472773	-0.591988
40S ribosomal protein S5 OS=Plasmodium falciparum (isolate 3D7) OX=36329 GN=PF3D7_1447000 PE=1 SV=1	PF3D7_1447000	0.734626	-0.419547
Heat shock protein 70 OS=Plasmodium falciparum (isolate 3D7) OX=36329 GN=PF3D7_1134000 PE=3 SV=1	PF3D7_1134000	0.19661400270103782	-0.686216
60S ribosomal protein L13 OS=Plasmodium falciparum (isolate 3D7) OX=36329 GN=PF3D7_0814000 PE=1 SV=1	PF3D7_0814000	0.9509901872454167	-0.153125
60S acidic ribosomal protein P0 OS=Plasmodium falciparum (isolate 3D7) OX=36329 GN=PF3D7_1130200 PE=3 SV=1	PF3D7_1130200	1.046547564427422	-0.939516
Phosphotransferase OS=Plasmodium falciparum (isolate 3D7) OX=36329 GN=PF3D7_0624000 PE=3 SV=1	PF3D7_0624000	0.6375928273313861	-0.277219
Acetyl-CoA carboxylase OS=Plasmodium falciparum (isolate 3D7) OX=36329 GN=PF3D7_1469600 PE=4 SV=2	PF3D7_1469600	-0.00961313	0.061611686712129826
40S ribosomal protein S6 OS=Plasmodium falciparum (isolate 3D7) OX=36329 GN=PF3D7_1342000 PE=1 SV=1	PF3D7_1342000	0.7963785506607686	-0.980902
60S ribosomal protein L2 OS=Plasmodium falciparum (isolate 3D7) OX=36329 GN=PF3D7_0516900 PE=1 SV=1	PF3D7_0516900	0.8709492726715093	-0.806045
High molecular weight rhoptry protein 3 OS=Plasmodium falciparum (isolate 3D7) OX=36329 GN=PF3D7_0905400 PE=4 SV=1	PF3D7_0905400	0.0458867	0.684467
60S ribosomal protein L7a OS=Plasmodium falciparum (isolate 3D7) OX=36329 GN=PF3D7_1424400 PE=1 SV=2	PF3D7_1424400	0.644862	-0.37777
40S ribosomal protein S16, putative OS=Plasmodium falciparum (isolate 3D7) OX=36329 GN=PF3D7_0813900 PE=1 SV=1	PF3D7_0813900	0.44436309138582436	-0.158641
Tubulin beta chain OS=Plasmodium falciparum (isolate 3D7) OX=36329 GN=PF3D7_1008700 PE=3 SV=1	PF3D7_1008700	0.46991770063451016	-0.25983
AAA family ATPase, putative OS=Plasmodium falciparum (isolate 3D7) OX=36329 GN=PF3D7_0803500 PE=4 SV=1	PF3D7_0803500	0.1756634431072014	1.3819873112617795
Mature parasite-infected erythrocyte surface antigen OS=Plasmodium falciparum (isolate 3D7) OX=36329 GN=PF3D7_0500800 PE=4 SV=1	PF3D7_0500800	0.17177912697345987	-0.816473
Eukaryotic translation initiation factor 3 subunit A OS=Plasmodium falciparum (isolate 3D7) OX=36329 GN=PF3D7_1212700 PE=3 SV=1	PF3D7_1212700	-0.0911266	-0.020459
40S ribosomal protein S15 OS=Plasmodium falciparum (isolate 3D7) OX=36329 GN=PF3D7_1358800 PE=1 SV=1	PF3D7_1358800	0.5594203895516807	-0.509757
40S ribosomal protein S7 OS=Plasmodium falciparum (isolate 3D7) OX=36329 GN=PF3D7_1302800 PE=1 SV=1	PF3D7_1302800	0.6369061412242818	-0.15373
60S ribosomal protein L27 OS=Plasmodium falciparum (isolate 3D7) OX=36329 GN=PF3D7_1460700 PE=1 SV=2	PF3D7_1460700	0.3625228430091474	-0.232947
40S ribosomal protein S15A, putative OS=Plasmodium falciparum (isolate 3D7) OX=36329 GN=PF3D7_0316800 PE=1 SV=1	PF3D7_0316800	0.24458356259543448	-0.170959
40S ribosomal protein S19 OS=Plasmodium falciparum (isolate 3D7) OX=36329 GN=PF3D7_0422400 PE=1 SV=1	PF3D7_0422400	0.4497971883715622	-0.787533
40S ribosomal protein S11, putative OS=Plasmodium falciparum (isolate 3D7) OX=36329 GN=PF3D7_0317600 PE=1 SV=2	PF3D7_0317600	0.12520481513950582	0.3539212254890547
Elongation factor 1-gamma, putative OS=Plasmodium falciparum (isolate 3D7) OX=36329 GN=PF3D7_1338300 PE=4 SV=1	PF3D7_1338300	0.2489050118855069	-0.344723
Ribosomal protein L15 OS=Plasmodium falciparum (isolate 3D7) OX=36329 GN=PF3D7_0415900 PE=1 SV=1	PF3D7_0415900	-0.0705801	0.17560493823802323
Histone H2A OS=Plasmodium falciparum (isolate 3D7) OX=36329 GN=PF3D7_0320900 PE=3 SV=1	PF3D7_0320900	-0.0946952	-0.186099
Histone H2A OS=Plasmodium falciparum (isolate 3D7) OX=36329 GN=PF3D7_0617800 PE=3 SV=1	PF3D7_0617800	-0.0370032	-0.365539
26S protease regulatory subunit 7, putative OS=Plasmodium falciparum (isolate 3D7) OX=36329 GN=PF3D7_1311500 PE=3 SV=2	PF3D7_1311500	0.0718342	0.35959763043693027
60S ribosomal protein L18-2, putative OS=Plasmodium falciparum (isolate 3D7) OX=36329 GN=PF3D7_1341300 PE=1 SV=1	PF3D7_1341300	0.8330839542457071	-0.199095
60S ribosomal protein L18a OS=Plasmodium falciparum (isolate 3D7) OX=36329 GN=PF3D7_1341200 PE=1 SV=1	PF3D7_1341200	0.35456663053610704	-0.00890665
60S ribosomal protein L21 OS=Plasmodium falciparum (isolate 3D7) OX=36329 GN=PF3D7_1426000 PE=1 SV=1	PF3D7_1426000	0.5558186737827163	-0.567439
ATP-dependent RNA helicase DDX5, putative OS=Plasmodium falciparum (isolate 3D7) OX=36329 GN=PF3D7_1445900 PE=2 SV=2	PF3D7_1445900	0.052433426931534584	-0.399551
40S ribosomal protein S5, putative OS=Plasmodium falciparum (isolate 3D7) OX=36329 GN=PF3D7_0721600 PE=1 SV=1	PF3D7_0721600	0.1667379441622795	-0.411263
Rhoptry-associated protein 1 OS=Plasmodium falciparum (isolate 3D7) OX=36329 GN=PF3D7_1410400 PE=4 SV=1	PF3D7_1410400	0.31026488123868173	-0.682397
Histone H3 OS=Plasmodium falciparum (isolate 3D7) OX=36329 GN=PF3D7_0617900 PE=3 SV=1	PF3D7_0617900	0.1097986663411877	-0.571226
Karyopherin beta OS=Plasmodium falciparum (isolate 3D7) OX=36329 GN=PF3D7_0524000 PE=4 SV=1	PF3D7_0524000	-0.0575827	-0.453645
Phosphoglycerate mutase OS=Plasmodium falciparum (isolate 3D7) OX=36329 GN=PF3D7_1120100 PE=1 SV=1	PF3D7_1120100	0.2781274317311644	-0.604145
40S ribosomal protein S18, putative OS=Plasmodium falciparum (isolate 3D7) OX=36329 GN=PF3D7_1126200 PE=1 SV=1	PF3D7_1126200	0.30990501447812785	-0.566674
Ras-related protein Rab-1B OS=Plasmodium falciparum (isolate 3D7) OX=36329 GN=PF3D7_0512600 PE=4 SV=1	PF3D7_0512600	-0.210472	0.396464
Merozoite surface antigens OS=Plasmodium falciparum (isolate 3D7) OX=36329 GN=PF3D7_0930300 PE=4 SV=1	PF3D7_0930300	-0.261684	-0.292199
DNA replication licensing factor MCM7 OS=Plasmodium falciparum (isolate 3D7) OX=36329 GN=MCM7 PE=3 SV=1	MCM7	-0.132627	0.6367675064627244
ADP-ribosylation factor OS=Plasmodium falciparum (isolate 3D7) OX=36329 GN=PF3D7_1020900 PE=3 SV=1	PF3D7_1020900	0.24239131461810745	0.6313373789276194
60S ribosomal protein L6, putative OS=Plasmodium falciparum (isolate 3D7) OX=36329 GN=PF3D7_1338200 PE=3 SV=1	PF3D7_1338200	0.0678726	0.4176387834138504
CCT-beta OS=Plasmodium falciparum (isolate 3D7) OX=36329 GN=PF3D7_0306800 PE=3 SV=4	PF3D7_0306800	-0.0907667	-0.136182
Rhoptry neck protein 3 OS=Plasmodium falciparum (isolate 3D7) OX=36329 GN=PF3D7_1252100 PE=4 SV=1	PF3D7_1252100	-0.15242	0.10129974626993876
T-complex protein 1 subunit delta OS=Plasmodium falciparum (isolate 3D7) OX=36329 GN=PF3D7_1357800 PE=3 SV=1	PF3D7_1357800	-0.377428	0.1824057194259324
Thioredoxin-like mero protein OS=Plasmodium falciparum (isolate 3D7) OX=36329 GN=PF3D7_1104400 PE=4 SV=1	PF3D7_1104400	-0.205071	-0.12447
T-complex protein 1 subunit gamma OS=Plasmodium falciparum (isolate 3D7) OX=36329 GN=PF3D7_1229500 PE=3 SV=1	PF3D7_1229500	-0.0579095	-0.44588
Cell division cycle protein 48 homologue, putative OS=Plasmodium falciparum (isolate 3D7) OX=36329 GN=PF3D7_0619400 PE=4 SV=1	PF3D7_0619400	0.028971923418165287	-0.776785
60S ribosomal protein L23 OS=Plasmodium falciparum (isolate 3D7) OX=36329 GN=PF3D7_1323400 PE=1 SV=1	PF3D7_1323400	0.1425897545418059	-0.665009
Methionine--tRNA ligase OS=Plasmodium falciparum (isolate 3D7) OX=36329 GN=PF3D7_1034900 PE=3 SV=1	PF3D7_1034900	0.191606	-0.388963
Phosphopyruvate hydratase OS=Plasmodium falciparum (isolate 3D7) OX=36329 GN=PF3D7_1015900 PE=3 SV=1	PF3D7_1015900	-0.0618711	-0.387839
26S protease regulatory subunit 8, putative OS=Plasmodium falciparum (isolate 3D7) OX=36329 GN=PF3D7_1248900 PE=3 SV=1	PF3D7_1248900	-0.492092	0.309841
Multidrug resistance protein 1 OS=Plasmodium falciparum (isolate 3D7) OX=36329 GN=PF3D7_0523000 PE=4 SV=1	PF3D7_0523000	-0.204351	-0.355916
40S ribosomal protein S17, putative OS=Plasmodium falciparum (isolate 3D7) OX=36329 GN=PF3D7_1242700 PE=1 SV=1	PF3D7_1242700	0.0733067	-0.211252
Gamete antigen 27/25 OS=Plasmodium falciparum (isolate 3D7) OX=36329 GN=PF3D7_1302100 PE=1 SV=1	PF3D7_1302100	0.3249843439298957	0.3662387135727192
40S ribosomal protein S20e, putative OS=Plasmodium falciparum (isolate 3D7) OX=36329 GN=PF3D7_1003500 PE=1 SV=1	PF3D7_1003500	-0.319343	-0.220716
40S ribosomal protein S19 OS=Plasmodium falciparum (isolate 3D7) OX=36329 GN=PF3D7_1317800 PE=1 SV=1	PF3D7_1317800	0.16277636163276105	-0.353222
60S ribosomal protein L6, putative OS=Plasmodium falciparum (isolate 3D7) OX=36329 GN=PF3D7_1323100 PE=1 SV=1	PF3D7_1323100	-0.258769	-0.111028
60S ribosomal protein L13, putative OS=Plasmodium falciparum (isolate 3D7) OX=36329 GN=PF3D7_1004000 PE=1 SV=1	PF3D7_1004000	-0.606037	0.20583
Erythrocyte membrane-associated antigen OS=Plasmodium falciparum (isolate 3D7) OX=36329 GN=PF3D7_0703500 PE=3 SV=2	PF3D7_0703500	-0.491012	-0.0373285
40S ribosomal protein S10, putative OS=Plasmodium falciparum (isolate 3D7) OX=36329 GN=PF3D7_0719700 PE=1 SV=1	PF3D7_0719700	-0.172574	-0.318445
60S ribosomal protein L11a, putative OS=Plasmodium falciparum (isolate 3D7) OX=36329 GN=PF3D7_0719600 PE=1 SV=1	PF3D7_0719600	0.24461661000943807	-0.278917
60S ribosomal protein L26, putative OS=Plasmodium falciparum (isolate 3D7) OX=36329 GN=PF3D7_0312800 PE=1 SV=1	PF3D7_0312800	0.12559772931406338	0.1302404737323387
60S ribosomal protein L12, putative OS=Plasmodium falciparum (isolate 3D7) OX=36329 GN=PF3D7_0517000 PE=3 SV=2	PF3D7_0517000	-0.0705801	0.17560493823802323
Ras-related protein Rab-2 OS=Plasmodium falciparum (isolate 3D7) OX=36329 GN=PF3D7_1231100 PE=4 SV=1	PF3D7_1231100	0.12448508161839808	0.5853674366215931
Acyl-CoA synthetase OS=Plasmodium falciparum (isolate 3D7) OX=36329 GN=PF3D7_0525100 PE=4 SV=1	PF3D7_0525100	-0.119956	0.015282544018531977
40S ribosomal protein S24 OS=Plasmodium falciparum (isolate 3D7) OX=36329 GN=PF3D7_0519400 PE=1 SV=1	PF3D7_0519400	-0.458155	-0.347026
Importin subunit alpha OS=Plasmodium falciparum (isolate 3D7) OX=36329 GN=PF3D7_0812400 PE=3 SV=1	PF3D7_0812400	-0.458908	-0.00762258
RNA-binding protein, putative OS=Plasmodium falciparum (isolate 3D7) OX=36329 GN=PF3D7_0823200 PE=4 SV=1	PF3D7_0823200	-0.319703	-0.104993
Ribosomal protein L37 OS=Plasmodium falciparum (isolate 3D7) OX=36329 GN=PF3D7_0706400 PE=1 SV=1	PF3D7_0706400	-0.744816	-0.0284386
HSP40, subfamily A OS=Plasmodium falciparum (isolate 3D7) OX=36329 GN=PF3D7_1437900 PE=4 SV=1	PF3D7_1437900	-0.410252	0.3841460272436084
Glutamyl-tRNA synthetase OS=Plasmodium falciparum (isolate 3D7) OX=36329 GN=PF3D7_1349200 PE=3 SV=1	PF3D7_1349200	-0.372713	-0.215039
Histone H2B OS=Plasmodium falciparum (isolate 3D7) OX=36329 GN=PF3D7_0714000 PE=3 SV=1	PF3D7_0714000	0.13430672272221533	-0.433203
DNA/RNA-binding protein Alba 3 OS=Plasmodium falciparum (isolate 3D7) OX=36329 GN=PF3D7_1006200 PE=4 SV=1	PF3D7_1006200	0.015254794612836835	0.0839113
60S ribosomal protein L28 OS=Plasmodium falciparum (isolate 3D7) OX=36329 GN=PF3D7_1142500 PE=1 SV=1	PF3D7_1142500	0.0809361	-0.427527
Ubiquitin OS=Plasmodium falciparum (isolate 3D7) OX=36329 GN=PF3D7_1365900 PE=1 SV=1	PF3D7_1365900	-0.439081	0.41988753589391764
Calcium-transporting ATPase OS=Plasmodium falciparum (isolate 3D7) OX=36329 GN=PF3D7_0106300 PE=4 SV=1	PF3D7_0106300	-0.116681	0.08073
60S ribosomal protein L19 OS=Plasmodium falciparum (isolate 3D7) OX=36329 GN=PF3D7_0614500 PE=1 SV=1	PF3D7_0614500	-0.0168496	0.0542054
Small GTP-binding protein sar1 OS=Plasmodium falciparum (isolate 3D7) OX=36329 GN=PF3D7_0416800 PE=3 SV=1	PF3D7_0416800	-0.23534	0.37416387100066195
Thioredoxin-related protein, putative OS=Plasmodium falciparum (isolate 3D7) OX=36329 GN=PF3D7_1352500 PE=4 SV=1	PF3D7_1352500	-0.258409	-0.226751
NPL domain-containing protein OS=Plasmodium falciparum (isolate 3D7) OX=36329 GN=PF3D7_0813300 PE=4 SV=1	PF3D7_0813300	-0.43368	-0.101046
26S protease regulatory subunit 10B, putative OS=Plasmodium falciparum (isolate 3D7) OX=36329 GN=PF3D7_1306400 PE=3 SV=1	PF3D7_1306400	-0.43476	0.24612327735072814
40S ribosomal protein S25 OS=Plasmodium falciparum (isolate 3D7) OX=36329 GN=PF3D7_1421200 PE=1 SV=2	PF3D7_1421200	0.0484718	-0.34151
40S ribosomal protein S29, putative OS=Plasmodium falciparum (isolate 3D7) OX=36329 GN=PF3D7_0705700 PE=1 SV=1	PF3D7_0705700	-0.266692	0.00505411
Eukaryotic translation initiation factor 3 subunit B OS=Plasmodium falciparum (isolate 3D7) OX=36329 GN=PF3D7_0517700 PE=3 SV=1	PF3D7_0517700	-0.495334	0.13643577711990565
60S ribosomal protein L24, putative OS=Plasmodium falciparum (isolate 3D7) OX=36329 GN=PF3D7_1309100 PE=1 SV=1	PF3D7_1309100	-0.258376	-0.334709
60S ribosomal protein L14, putative OS=Plasmodium falciparum (isolate 3D7) OX=36329 GN=PF3D7_1431700 PE=1 SV=1	PF3D7_1431700	-0.0738219	0.00219988
Single-strand telomeric DNA-binding protein GBP2, putative OS=Plasmodium falciparum (isolate 3D7) OX=36329 GN=PF3D7_1006800 PE=4 SV=1	PF3D7_1006800	-0.26273	-0.052987
V-type proton ATPase catalytic subunit A OS=Plasmodium falciparum (isolate 3D7) OX=36329 GN=vapA PE=1 SV=1	vapA	-0.859514	0.20695411623261067
60S ribosomal protein L32 OS=Plasmodium falciparum (isolate 3D7) OX=36329 GN=PF3D7_0903900 PE=1 SV=1	PF3D7_0903900	-0.172181	-0.542126
CCT-alpha OS=Plasmodium falciparum (isolate 3D7) OX=36329 GN=PF3D7_1132200 PE=3 SV=1	PF3D7_1132200	-0.51624	0.056095
Cation transporting P-ATPase OS=Plasmodium falciparum (isolate 3D7) OX=36329 GN=PF3D7_0504000 PE=4 SV=1	PF3D7_0504000	-0.418928	0.8396321905204338
M1-family alanyl aminopeptidase OS=Plasmodium falciparum (isolate 3D7) OX=36329 GN=PF3D7_1311800 PE=1 SV=1	PF3D7_1311800	-0.400496	-0.418509
DNA/RNA-binding protein Alba 4 OS=Plasmodium falciparum (isolate 3D7) OX=36329 GN=PF3D7_1347500 PE=4 SV=1	PF3D7_1347500	-0.488457	0.25956514167442635
40S ribosomal protein S23, putative OS=Plasmodium falciparum (isolate 3D7) OX=36329 GN=PF3D7_0306900 PE=1 SV=1	PF3D7_0306900	-0.467584	0.4478635851684042
Obg-like ATPase 1 OS=Plasmodium falciparum (isolate 3D7) OX=36329 GN=PF3D7_0722400 PE=3 SV=1	PF3D7_0722400	-0.492452	0.4255639408417931
Heat shock protein 101 OS=Plasmodium falciparum (isolate 3D7) OX=36329 GN=PF3D7_1116800 PE=1 SV=1	PF3D7_1116800	-0.687517	0.015801442458223368
60S ribosomal protein L23, putative OS=Plasmodium falciparum (isolate 3D7) OX=36329 GN=PF3D7_1331800 PE=1 SV=1	PF3D7_1331800	-0.385384	0.4064456715702194
Endoplasmic reticulum-resident calcium binding protein OS=Plasmodium falciparum (isolate 3D7) OX=36329 GN=PF3D7_1108600 PE=4 SV=1	PF3D7_1108600	-0.400856	-0.302786
Dihydrolipoyllysine-residue succinyltransferase OS=Plasmodium falciparum (isolate 3D7) OX=36329 GN=PF3D7_1320800 PE=3 SV=1	PF3D7_1320800	-0.319096	0.8131076622606086
PI31 domain-containing protein, putative OS=Plasmodium falciparum (isolate 3D7) OX=36329 GN=PF3D7_1010100 PE=4 SV=1	PF3D7_1010100	-0.429326	-0.382768
40S ribosomal protein S26 OS=Plasmodium falciparum (isolate 3D7) OX=36329 GN=PF3D7_0217800 PE=1 SV=1	PF3D7_0217800	-0.070547	0.0676473
Vesicle-associated membrane protein, putative OS=Plasmodium falciparum (isolate 3D7) OX=36329 GN=PF3D7_1439800 PE=4 SV=1	PF3D7_1439800	-0.406257	0.21814722807624154
Uncharacterized protein OS=Plasmodium falciparum (isolate 3D7) OX=36329 GN=PF3D7_0617200 PE=4 SV=1	PF3D7_0617200	-0.237502	-0.146411
60S ribosomal protein L30e, putative OS=Plasmodium falciparum (isolate 3D7) OX=36329 GN=PF3D7_1019400 PE=1 SV=1	PF3D7_1019400	-0.266725	0.11301175655326107
60S ribosomal protein L35ae, putative OS=Plasmodium falciparum (isolate 3D7) OX=36329 GN=PF3D7_1142600 PE=1 SV=1	PF3D7_1142600	-0.634146	0.010125037510347676
ADP/ATP transporter on adenylate translocase OS=Plasmodium falciparum (isolate 3D7) OX=36329 GN=PF3D7_1037300 PE=3 SV=1	PF3D7_1037300	-0.580809	0.11240627875291877
26S proteasome regulatory subunit RPN11 OS=Plasmodium falciparum (isolate 3D7) OX=36329 GN=PF3D7_1368100 PE=4 SV=1	PF3D7_1368100	-0.720341	0.21754175027589936
DnaJ protein, putative OS=Plasmodium falciparum (isolate 3D7) OX=36329 GN=PF3D7_0823800 PE=4 SV=1	PF3D7_0823800	-0.572493	-0.227357
Uncharacterized protein OS=Plasmodium falciparum (isolate 3D7) OX=36329 GN=PF3D7_1445700 PE=4 SV=1	PF3D7_1445700	-0.802181	0.1432365583078149
T-complex protein 1 subunit zeta OS=Plasmodium falciparum (isolate 3D7) OX=36329 GN=PF3D7_0608700 PE=3 SV=1	PF3D7_0608700	-0.663369	0.26954729791737275
Ribonucleoside-diphosphate reductase OS=Plasmodium falciparum (isolate 3D7) OX=36329 GN=PF3D7_1437200 PE=3 SV=1	PF3D7_1437200	-0.630545	0.067807
Ras-related protein RAB7 OS=Plasmodium falciparum (isolate 3D7) OX=36329 GN=PF3D7_0903200 PE=4 SV=1	PF3D7_0903200	-0.688237	0.24724765359076178
40S ribosomal protein S21 OS=Plasmodium falciparum (isolate 3D7) OX=36329 GN=PF3D7_1144000 PE=1 SV=1	PF3D7_1144000	-0.548704	0.1421121820677812
Eukaryotic translation initiation factor 3 subunit I OS=Plasmodium falciparum (isolate 3D7) OX=36329 GN=PF3D7_0716800 PE=3 SV=1	PF3D7_0716800	-0.606756	0.4372759511251155
26S protease regulatory subunit 6B, putative OS=Plasmodium falciparum (isolate 3D7) OX=36329 GN=PF3D7_0413600 PE=3 SV=1	PF3D7_0413600	-0.519842	-0.00158697
Tudor staphylococcal nuclease OS=Plasmodium falciparum (isolate 3D7) OX=36329 GN=PF3D7_1136300 PE=4 SV=1	PF3D7_1136300	-0.491339	-0.029563
Replication protein A1, small OS=Plasmodium falciparum (isolate 3D7) OX=36329 GN=PF3D7_0904800 PE=4 SV=1	PF3D7_0904800	-0.46251	-0.0653045
60S ribosomal protein L35, putative OS=Plasmodium falciparum (isolate 3D7) OX=36329 GN=PF3D7_1124900 PE=1 SV=2	PF3D7_1124900	-0.552666	0.20015333504470145
60S ribosomal protein L36 OS=Plasmodium falciparum (isolate 3D7) OX=36329 GN=PF3D7_1109900 PE=1 SV=2	PF3D7_1109900	-0.302791	0.14134700621531882
FACT complex subunit OS=Plasmodium falciparum (isolate 3D7) OX=36329 GN=PF3D7_0517400 PE=3 SV=1	PF3D7_0517400	-0.491372	0.0783946
Elongation factor 1-beta OS=Plasmodium falciparum (isolate 3D7) OX=36329 GN=PF3D7_0913200 PE=3 SV=1	PF3D7_0913200	-0.54471	-0.0238866
Vacuolar proton pump subunit B OS=Plasmodium falciparum (isolate 3D7) OX=36329 GN=PF3D7_0406100 PE=3 SV=1	PF3D7_0406100	-0.745209	0.19524210594928826
Uncharacterized protein OS=Plasmodium falciparum (isolate 3D7) OX=36329 GN=PF3D7_1419700 PE=4 SV=1	PF3D7_1419700	-0.720341	0.21754175027589936
Coatomer alpha subunit, putative OS=Plasmodium falciparum (isolate 3D7) OX=36329 GN=PF3D7_0606700 PE=4 SV=1	PF3D7_0606700	-0.687877	0.13152454802449248
DNA helicase OS=Plasmodium falciparum (isolate 3D7) OX=36329 GN=PF3D7_1317100 PE=3 SV=1	PF3D7_1317100	-0.744849	0.079519
Polyadenylate-binding protein 2, putative OS=Plasmodium falciparum (isolate 3D7) OX=36329 GN=PF3D7_0923900 PE=4 SV=1	PF3D7_0923900	-0.520202	0.11413613279329463
Actin II OS=Plasmodium falciparum (isolate 3D7) OX=36329 GN=PF3D7_1412500 PE=3 SV=1	PF3D7_1412500	-0.577174	0.0621306
Clathrin heavy chain OS=Plasmodium falciparum (isolate 3D7) OX=36329 GN=PF3D7_1219100 PE=3 SV=1	PF3D7_1219100	-0.601682	-0.0758922
60S ribosomal protein L44 OS=Plasmodium falciparum (isolate 3D7) OX=36329 GN=RPL44 PE=1 SV=3	RPL44	-0.319669	-0.21295
Uncharacterized protein MAL13P1.336 OS=Plasmodium falciparum (isolate 3D7) OX=36329 GN=MAL13P1.336 PE=1 SV=1	MAL13P1	-0.659014	-0.0121746
Uncharacterized protein OS=Plasmodium falciparum (isolate 3D7) OX=36329 GN=PF3D7_1036900 PE=4 SV=1	PF3D7_1036900	-0.716347	0.051542951108532534
26S protease regulatory subunit 4, putative OS=Plasmodium falciparum (isolate 3D7) OX=36329 GN=PF3D7_1008400 PE=3 SV=2	PF3D7_1008400	-0.663729	0.3852704034836421
Carbamoyl phosphate synthetase OS=Plasmodium falciparum (isolate 3D7) OX=36329 GN=PF3D7_1308200 PE=4 SV=1	PF3D7_1308200	-0.638501	0.29184694224398383
Acid phosphatase OS=Plasmodium falciparum (isolate 3D7) OX=36329 GN=PF3D7_0918000 PE=1 SV=1	PF3D7_0918000	-0.487738	0.028118930541887893
Protein-synthesizing GTPase OS=Plasmodium falciparum (isolate 3D7) OX=36329 GN=PF3D7_1410600 PE=4 SV=1	PF3D7_1410600	-0.745209	0.19524210594928826
DNA replication licensing factor MCM2 OS=Plasmodium falciparum (isolate 3D7) OX=36329 GN=PF3D7_1417800 PE=3 SV=1	PF3D7_1417800	-0.801822	0.027513452741545645
DNA replication licensing factor MCM3, putative OS=Plasmodium falciparum (isolate 3D7) OX=36329 GN=PF3D7_0527000 PE=3 SV=1	PF3D7_0527000	-0.801822	0.027513452741545645
2-oxoglutarate dehydrogenase E1 component OS=Plasmodium falciparum (isolate 3D7) OX=36329 GN=PF3D7_0820700 PE=3 SV=1	PF3D7_0820700	-0.621949	0.6539096442811511
Eukaryotic translation initiation factor 3 subunit D OS=Plasmodium falciparum (isolate 3D7) OX=36329 GN=PF3D7_1007900 PE=3 SV=1	PF3D7_1007900	-0.687157	-0.0999217
Cofilin/actin-depolymerizing factor homolog 1 OS=Plasmodium falciparum (isolate 3D7) OX=36329 GN=PFE0165w PE=1 SV=1	PFE0165w	-0.495694	0.252159
High mobility group protein B1 OS=Plasmodium falciparum (isolate 3D7) OX=36329 GN=PF3D7_1202900 PE=4 SV=1	PF3D7_1202900	-0.471186	0.39018163257905514
ATP-dependent RNA helicase DBP1, putative OS=Plasmodium falciparum (isolate 3D7) OX=36329 GN=PF3D7_0810600 PE=4 SV=1	PF3D7_0810600	-0.634506	0.12584814307661701
40S ribosomal protein SA OS=Plasmodium falciparum (isolate 3D7) OX=36329 GN=PF3D7_1026800 PE=3 SV=1	PF3D7_1026800	-0.520202	0.11413613279329463
Ras-related protein Rab-18 OS=Plasmodium falciparum (isolate 3D7) OX=36329 GN=PF3D7_0807300 PE=4 SV=1	PF3D7_0807300	-0.778033	0.3969824137669643
Myosin F, putative OS=Plasmodium falciparum (isolate 3D7) OX=36329 GN=PF3D7_1329100 PE=3 SV=1	PF3D7_1329100	-0.803261	0.4904058750066227
26S protease regulatory subunit 6A, putative OS=Plasmodium falciparum (isolate 3D7) OX=36329 GN=PF3D7_1130400 PE=3 SV=1	PF3D7_1130400	-0.605677	0.0901066
40S ribosomal protein S28e, putative OS=Plasmodium falciparum (isolate 3D7) OX=36329 GN=PF3D7_1461300 PE=1 SV=1	PF3D7_1461300	-0.663009	0.1538241923511036
Glideosome-associated connector OS=Plasmodium falciparum (isolate 3D7) OX=36329 GN=PF3D7_1361800 PE=4 SV=1	PF3D7_1361800	-0.719981	0.10181864470963012
60S ribosomal protein L1, putative OS=Plasmodium falciparum (isolate 3D7) OX=36329 GN=PF3D7_1441200 PE=3 SV=1	PF3D7_1441200	-0.719981	0.10181864470963012
Cytoadherence linked asexual protein 3.1 OS=Plasmodium falciparum (isolate 3D7) OX=36329 GN=PF3D7_0302500 PE=4 SV=2	PF3D7_0302500	-0.778033	0.3969824137669643
Eukaryotic translation initiation factor 3 subunit C OS=Plasmodium falciparum (isolate 3D7) OX=36329 GN=PF3D7_1206200 PE=3 SV=1	PF3D7_1206200	-0.859874	0.32267722179887975
Nucleosome assembly protein OS=Plasmodium falciparum (isolate 3D7) OX=36329 GN=PF3D7_0919000 PE=3 SV=1	PF3D7_0919000	-0.745209	0.19524210594928826
26S proteasome regulatory subunit RPN1, putative OS=Plasmodium falciparum (isolate 3D7) OX=36329 GN=PF3D7_0205900 PE=3 SV=3	PF3D7_0205900	-0.638861	0.4075700478102531
cAMP-dependent protein kinase regulatory subunit OS=Plasmodium falciparum (isolate 3D7) OX=36329 GN=PF3D7_1223100 PE=1 SV=1	PF3D7_1223100	-0.802901	0.37468276944035334
Isoleucyl-tRNA synthetase OS=Plasmodium falciparum (isolate 3D7) OX=36329 GN=PF3D7_1332900 PE=3 SV=1	PF3D7_1332900	-0.859154	0.091231
Nucleosome assembly protein OS=Plasmodium falciparum (isolate 3D7) OX=36329 GN=PF3D7_1203700 PE=1 SV=2	PF3D7_1203700	-0.753525	0.5350051636598446
T-complex protein 1 subunit theta OS=Plasmodium falciparum (isolate 3D7) OX=36329 GN=PF3D7_0214000 PE=3 SV=3	PF3D7_0214000	-0.605677	0.0901066
Uncharacterized protein OS=Plasmodium falciparum (isolate 3D7) OX=36329 GN=PF3D7_1352400 PE=4 SV=1	PF3D7_1352400	-0.803261	0.4904058750066227
FACT complex subunit SSRP1 OS=Plasmodium falciparum (isolate 3D7) OX=36329 GN=PF3D7_1441400 PE=3 SV=1	PF3D7_1441400	-0.859514	0.20695411623261067
Prolyl-tRNA synthetase OS=Plasmodium falciparum (isolate 3D7) OX=36329 GN=PF3D7_1213800 PE=3 SV=1	PF3D7_1213800	-0.744489	-0.0362041
Tetratricopeptide repeat protein, putative OS=Plasmodium falciparum (isolate 3D7) OX=36329 GN=PF3D7_1205600 PE=4 SV=1	PF3D7_1205600	-0.687877	0.13152454802449248
Ethanolamine kinase OS=Plasmodium falciparum (isolate 3D7) OX=36329 GN=PF3D7_1124600 PE=4 SV=1	PF3D7_1124600	-0.687517	0.015801442458223368
Non-SERCA-type Ca2+ -transporting P-ATPase OS=Plasmodium falciparum (isolate 3D7) OX=36329 GN=PF3D7_1211900 PE=4 SV=1	PF3D7_1211900	-0.801822	0.027513452741545645
1-cys peroxiredoxin OS=Plasmodium falciparum (isolate 3D7) OX=36329 GN=PF3D7_0802200 PE=3 SV=1	PF3D7_0802200	-0.744489	-0.0362041
Proliferation-associated protein 2g4, putative OS=Plasmodium falciparum (isolate 3D7) OX=36329 GN=PF3D7_1428300 PE=3 SV=1	PF3D7_1428300	-0.716347	0.051542951108532534
Uncharacterized protein OS=Plasmodium falciparum (isolate 3D7) OX=36329 GN=PF3D7_1002900 PE=4 SV=2	PF3D7_1002900	-0.777314	0.16553620263442584
T-complex protein 1 subunit epsilon OS=Plasmodium falciparum (isolate 3D7) OX=36329 GN=PF3D7_0320300 PE=3 SV=1	PF3D7_0320300	-0.859514	0.20695411623261067
RNA-binding protein, putative OS=Plasmodium falciparum (isolate 3D7) OX=36329 GN=PF3D7_1004400 PE=4 SV=1	PF3D7_1004400	-0.720341	0.21754175027589936
Calcyclin-binding protein OS=Plasmodium falciparum (isolate 3D7) OX=36329 GN=PF3D7_1238100 PE=4 SV=2	PF3D7_1238100	-0.659734	0.21927160431627524
Ras-related protein Rab-11A OS=Plasmodium falciparum (isolate 3D7) OX=36329 GN=PF3D7_1320600 PE=1 SV=1	PF3D7_1320600	-0.721061	0.44898796140843783
Transcriptional coactivator ADA2 OS=Plasmodium falciparum (isolate 3D7) OX=36329 GN=PF3D7_1014600 PE=4 SV=1	PF3D7_1014600	-0.630152	-0.155874
Kelch domain-containing protein, putative OS=Plasmodium falciparum (isolate 3D7) OX=36329 GN=PF3D7_1468100 PE=4 SV=1	PF3D7_1468100	-0.607116	0.5529990566913847
Nucleoporin NUP116/NSP116, putative OS=Plasmodium falciparum (isolate 3D7) OX=36329 GN=PF3D7_1473700 PE=4 SV=1	PF3D7_1473700	-0.659734	0.21927160431627524
Dynamin-like protein OS=Plasmodium falciparum (isolate 3D7) OX=36329 GN=PF3D7_1145400 PE=3 SV=1	PF3D7_1145400	-0.745569	0.3109652115155576
60S ribosomal protein L22, putative OS=Plasmodium falciparum (isolate 3D7) OX=36329 GN=PF3D7_0821700 PE=1 SV=1	PF3D7_0821700	-0.37304	-0.207274
Small heat shock protein, putative OS=Plasmodium falciparum (isolate 3D7) OX=36329 GN=PF3D7_1304500 PE=3 SV=1	PF3D7_1304500	-0.516567	0.0638604
Uncharacterized protein OS=Plasmodium falciparum (isolate 3D7) OX=36329 GN=PF3D7_1328300 PE=4 SV=1	PF3D7_1328300	-0.745209	0.19524210594928826
Ribonucleoside-diphosphate reductase small chain, putative OS=Plasmodium falciparum (isolate 3D7) OX=36329 GN=PF3D7_1405600 PE=3 SV=1	PF3D7_1405600	-0.916486	0.1549485685911372
DnaJ protein, putative OS=Plasmodium falciparum (isolate 3D7) OX=36329 GN=PF3D7_1473200 PE=4 SV=1	PF3D7_1473200	-0.859514	0.20695411623261067
Casein kinase I OS=Plasmodium falciparum (isolate 3D7) OX=36329 GN=PF3D7_1136500.1 PE=3 SV=1	PF3D7_1136500	-0.692198	0.305289
Chromodomain-helicase-DNA-binding protein 1 homolog, putative OS=Plasmodium falciparum (isolate 3D7) OX=36329 GN=PF3D7_1023900 PE=4 SV=1	PF3D7_1023900	-0.634146	0.010125037510347676
Transformer-2 protein homolog beta, putative OS=Plasmodium falciparum (isolate 3D7) OX=36329 GN=PF3D7_1002400.1 PE=4 SV=1	PF3D7_1002400	-0.691479	0.0738426
Uncharacterized protein OS=Plasmodium falciparum (isolate 3D7) OX=36329 GN=PF3D7_0210900 PE=4 SV=1	PF3D7_0210900	-0.720341	0.21754175027589936
Aspartyl-tRNA synthetase OS=Plasmodium falciparum (isolate 3D7) OX=36329 GN=PF3D7_0102900 PE=3 SV=1	PF3D7_0102900	-0.659014	-0.0121746
Cation transporting ATPase, putative OS=Plasmodium falciparum (isolate 3D7) OX=36329 GN=PF3D7_0727800 PE=4 SV=1	PF3D7_0727800	-0.778033	0.3969824137669643
Uncharacterized protein OS=Plasmodium falciparum (isolate 3D7) OX=36329 GN=PF3D7_1435600 PE=4 SV=1	PF3D7_1435600	-0.689316	0.5944169702895695
Hsc70-interacting protein OS=Plasmodium falciparum (isolate 3D7) OX=36329 GN=PF3D7_0527500 PE=3 SV=1	PF3D7_0527500	-0.859874	0.32267722179887975
SNF2 helicase, putative OS=Plasmodium falciparum (isolate 3D7) OX=36329 GN=PF3D7_0624600 PE=4 SV=1	PF3D7_0624600	-0.801822	0.027513452741545645
H(+)-exporting diphosphatase OS=Plasmodium falciparum (isolate 3D7) OX=36329 GN=PF3D7_1456800 PE=3 SV=1	PF3D7_1456800	-0.715987	-0.0641802
Protein kinase, putative OS=Plasmodium falciparum (isolate 3D7) OX=36329 GN=PF3D7_0926100 PE=4 SV=1	PF3D7_0926100	-0.917206	0.3863947797236756
Falcilysin OS=Plasmodium falciparum (isolate 3D7) OX=36329 GN=PF3D7_1360800 PE=1 SV=1	PF3D7_1360800	-0.744489	-0.0362041
Casein kinase 2, alpha subunit OS=Plasmodium falciparum (isolate 3D7) OX=36329 GN=PF3D7_1108400 PE=1 SV=1	PF3D7_1108400	-0.859154	0.091231
Chromatin remodeling protein OS=Plasmodium falciparum (isolate 3D7) OX=36329 GN=PF3D7_1104200 PE=4 SV=1	PF3D7_1104200	-0.916486	0.1549485685911372
DNA helicase OS=Plasmodium falciparum (isolate 3D7) OX=36329 GN=PF3D7_1355100 PE=3 SV=1	PF3D7_1355100	-0.802541	0.25895966387408403
Ras-related protein Rab-11B OS=Plasmodium falciparum (isolate 3D7) OX=36329 GN=PF3D7_1340700 PE=4 SV=2	PF3D7_1340700	-0.721421	0.5647110669747071
Heat shock protein 90, putative OS=Plasmodium falciparum (isolate 3D7) OX=36329 GN=PF3D7_1118200 PE=3 SV=1	PF3D7_1118200	-0.744489	-0.0362041
Adenosylhomocysteinase OS=Plasmodium falciparum (isolate 3D7) OX=36329 GN=PFE1050w PE=1 SV=2	PFE1050w	-0.859154	0.091231
60S ribosomal protein L37ae, putative OS=Plasmodium falciparum (isolate 3D7) OX=36329 GN=PF3D7_0210100.1 PE=3 SV=1	PF3D7_0210100	-0.634506	0.12584814307661701
Nuclear cap-binding protein subunit 2 OS=Plasmodium falciparum (isolate 3D7) OX=36329 GN=PF3D7_0415500 PE=3 SV=1	PF3D7_0415500	-0.691479	0.0738426
Uncharacterized protein OS=Plasmodium falciparum (isolate 3D7) OX=36329 GN=PF3D7_0108300 PE=4 SV=2	PF3D7_0108300	-0.859874	0.32267722179887975
CUGBP Elav-like family member 2, putative OS=Plasmodium falciparum (isolate 3D7) OX=36329 GN=PF3D7_1409800 PE=4 SV=1	PF3D7_1409800	-0.859874	0.32267722179887975
Phosphoribosylpyrophosphate synthetase OS=Plasmodium falciparum (isolate 3D7) OX=36329 GN=PF3D7_1325100 PE=3 SV=1	PF3D7_1325100	-0.752805	0.3035589525273062
Eukaryotic translation initiation factor 2 subunit alpha OS=Plasmodium falciparum (isolate 3D7) OX=36329 GN=PF3D7_0728000 PE=3 SV=1	PF3D7_0728000	-0.859514	0.20695411623261067
T-complex protein 1 subunit eta OS=Plasmodium falciparum (isolate 3D7) OX=36329 GN=MAL3P3.6 PE=3 SV=1	MAL3P3	-0.801822	0.027513452741545645
60S acidic ribosomal protein P2 OS=Plasmodium falciparum (isolate 3D7) OX=36329 GN=MAL3P3.19 PE=3 SV=1	PF3D7_1446200	-0.658655	-0.127898
M17 leucyl aminopeptidase OS=Plasmodium falciparum (isolate 3D7) OX=36329 GN=PF3D7_1446200 PE=1 SV=1	PF3D7_0528200	-0.859514	0.20695411623261067
Eukaryotic translation initiation factor 3 subunit E OS=Plasmodium falciparum (isolate 3D7) OX=36329 GN=PF3D7_0528200 PE=3 SV=1	Pfn	-0.777673	0.28125930820069517
Profilin OS=Plasmodium falciparum (isolate 3D7) OX=36329 GN=Pfn PE=3 SV=1	PF3D7_0519700	-0.687484	-0.0921562
FoP domain-containing protein, putative OS=Plasmodium falciparum (isolate 3D7) OX=36329 GN=PF3D7_0519700 PE=4 SV=1	PF3D7_1442300	-0.834646	0.22925376055922167
tRNA import protein tRIP OS=Plasmodium falciparum (isolate 3D7) OX=36329 GN=PF3D7_1442300 PE=4 SV=1	PF3D7_1312900	-0.916486	0.1549485685911372
Eukaryotic translation initation factor 4 gamma OS=Plasmodium falciparum (isolate 3D7) OX=36329 GN=PF3D7_1312900 PE=4 SV=1	PF3D7_0802000	-0.834646	0.22925376055922167
Glutamate dehydrogenase, putative OS=Plasmodium falciparum (isolate 3D7) OX=36329 GN=PF3D7_0802000 PE=3 SV=1	PF3D7_1220900	-0.801822	0.027513452741545645
Heterochromatin protein 1 OS=Plasmodium falciparum (isolate 3D7) OX=36329 GN=PF3D7_1220900 PE=1 SV=1	PF3D7_0916700	-0.802181	0.1432365583078149
RNA-binding protein musashi, putative OS=Plasmodium falciparum (isolate 3D7) OX=36329 GN=PF3D7_0916700 PE=4 SV=1	PF3D7_0627500	-0.744849	0.079519
Protein DJ-1 OS=Plasmodium falciparum (isolate 3D7) OX=36329 GN=PF3D7_0627500 PE=4 SV=1	PF3D7_1225800	-0.859154	0.091231
Ubiquitin-activating enzyme E1 OS=Plasmodium falciparum (isolate 3D7) OX=36329 GN=PF3D7_1225800 PE=3 SV=1	PF3D7_0211800	-0.801822	0.027513452741545645
Asparagine--tRNA ligase OS=Plasmodium falciparum (isolate 3D7) OX=36329 GN=PF3D7_0211800 PE=3 SV=1	PF3D7_0407800	-0.917206	0.3863947797236756
Protein CINCH OS=Plasmodium falciparum (isolate 3D7) OX=36329 GN=PF3D7_0407800 PE=4 SV=1	PF3D7_1426100	-0.773319	-0.000462597
Nascent polypeptide-associated complex subunit beta OS=Plasmodium falciparum (isolate 3D7) OX=36329 GN=PF3D7_1426100 PE=3 SV=1	PF3D7_1014900	-0.835365	0.4606999716917601
Uncharacterized protein OS=Plasmodium falciparum (isolate 3D7) OX=36329 GN=PF3D7_1014900 PE=4 SV=1	PF3D7_1021900	-0.916486	0.1549485685911372
PHAX domain-containing protein, putative OS=Plasmodium falciparum (isolate 3D7) OX=36329 GN=PF3D7_1021900 PE=4 SV=1	PF3D7_0218000	-0.695833	0.3555645001687796
Replication factor C subunit 2, putative OS=Plasmodium falciparum (isolate 3D7) OX=36329 GN=PF3D7_0218000 PE=3 SV=1	PF3D7_1466300	-0.716347	0.051542951108532534
26S proteasome regulatory subunit RPN2, putative OS=Plasmodium falciparum (isolate 3D7) OX=36329 GN=PF3D7_1466300 PE=3 SV=1	PF3D7_1012900	-0.916486	0.1549485685911372
Autophagy-related protein 18 OS=Plasmodium falciparum (isolate 3D7) OX=36329 GN=PF3D7_1012900 PE=4 SV=1	PF3D7_0816600	-0.916486	0.1549485685911372
Chaperone protein ClpB1 OS=Plasmodium falciparum (isolate 3D7) OX=36329 GN=PF3D7_0816600 PE=1 SV=1	PF3D7_1246800	-0.802541	0.25895966387408403
Signal recognition particle receptor subunit beta OS=Plasmodium falciparum (isolate 3D7) OX=36329 GN=PF3D7_1246800 PE=3 SV=1	PF3D7_0401800	-0.802181	0.1432365583078149
PRESAN domain-containing protein OS=Plasmodium falciparum (isolate 3D7) OX=36329 GN=PF3D7_0401800 PE=4 SV=1	PF3D7_1126000	-0.916486	0.1549485685911372
Threonyl-tRNA synthetase OS=Plasmodium falciparum (isolate 3D7) OX=36329 GN=PF3D7_1126000 PE=3 SV=1	PF3D7_1344200	-0.859154	0.091231
Endoplasmic reticulum chaperone GRP170 OS=Plasmodium falciparum (isolate 3D7) OX=36329 GN=PF3D7_1344200 PE=4 SV=1	PF3D7_1010600	-0.745209	0.19524210594928826
Eukaryotic translation initiation factor 2 subunit beta OS=Plasmodium falciparum (isolate 3D7) OX=36329 GN=PF3D7_1010600 PE=3 SV=1	PF3D7_1474800	-0.802181	0.1432365583078149
Proteasome subunit alpha type-1, putative OS=Plasmodium falciparum (isolate 3D7) OX=36329 GN=PF3D7_1474800 PE=1 SV=1	PF3D7_0517300	-0.630872	0.0755724
Serine/arginine-rich splicing factor 1 OS=Plasmodium falciparum (isolate 3D7) OX=36329 GN=PF3D7_0517300 PE=1 SV=2	PF3D7_1126700	-0.810498	0.48299961601837116
Autophagy-related protein 23, putative OS=Plasmodium falciparum (isolate 3D7) OX=36329 GN=PF3D7_1126700 PE=4 SV=2	MAL3P3	-0.744849	0.079519
T-complex protein 1 subunit eta OS=Plasmodium falciparum (isolate 3D7) OX=36329 GN=MAL3P3.6 PE=3 SV=1	PF3D7_0707400	-0.916486	0.1549485685911372
60S acidic ribosomal protein P2 OS=Plasmodium falciparum (isolate 3D7) OX=36329 GN=MAL3P3.19 PE=3 SV=1	PF3D7_1103100	-0.859154	0.091231
AAA family ATPase, putative OS=Plasmodium falciparum (isolate 3D7) OX=36329 GN=PF3D7_0707400 PE=4 SV=1	PF3D7_1342400	-0.859514	0.20695411623261067
60S acidic ribosomal protein P1, putative OS=Plasmodium falciparum (isolate 3D7) OX=36329 GN=PF3D7_1103100 PE=3 SV=1	PF3D7_0919100	-0.801822	0.027513452741545645
Casein kinase II subunit beta OS=Plasmodium falciparum (isolate 3D7) OX=36329 GN=PF3D7_1342400 PE=3 SV=1	PF3D7_0532400	-0.801822	0.027513452741545645
DnaJ protein, putative OS=Plasmodium falciparum (isolate 3D7) OX=36329 GN=PF3D7_0919100 PE=4 SV=1	PF3D7_1433500	-0.916486	0.1549485685911372
Lysine-rich membrane-associated PHISTb protein OS=Plasmodium falciparum (isolate 3D7) OX=36329 GN=PF3D7_0532400 PE=4 SV=1	PF3D7_1106000	-0.859514	0.20695411623261067
DNA topoisomerase 2 OS=Plasmodium falciparum (isolate 3D7) OX=36329 GN=PF3D7_1433500 PE=3 SV=1	PF3D7_1429800	-0.859514	0.20695411623261067
RuvB-like helicase OS=Plasmodium falciparum (isolate 3D7) OX=36329 GN=PF3D7_1106000 PE=3 SV=1	PF3D7_1447900	-0.859874	0.32267722179887975
Coatomer subunit beta, putative OS=Plasmodium falciparum (isolate 3D7) OX=36329 GN=PF3D7_1429800 PE=4 SV=2	PF3D7_1134100	-0.716347	0.051542951108532534
Multidrug resistance protein 2 OS=Plasmodium falciparum (isolate 3D7) OX=36329 GN=PF3D7_1447900 PE=4 SV=1	PF3D7_1457300	-0.802541	0.25895966387408403
Protein disulfide isomerase OS=Plasmodium falciparum (isolate 3D7) OX=36329 GN=PF3D7_1134100 PE=4 SV=1	PF3D7_0821000	-0.859874	0.32267722179887975
MA3 domain-containing protein, putative OS=Plasmodium falciparum (isolate 3D7) OX=36329 GN=PF3D7_1457300 PE=3 SV=1	PF3D7_0424600	-0.774039	0.23098361459959746
Uncharacterized protein OS=Plasmodium falciparum (isolate 3D7) OX=36329 GN=PF3D7_0821000 PE=4 SV=1	PF3D7_1416100	-0.802541	0.25895966387408403
PRESAN domain-containing protein OS=Plasmodium falciparum (isolate 3D7) OX=36329 GN=PF3D7_0424600 PE=4 SV=1	PF3D7_1318800	-0.916486	0.1549485685911372
Protein SEY1 homolog OS=Plasmodium falciparum (isolate 3D7) OX=36329 GN=PF3D7_1416100 PE=3 SV=1	PF3D7_0831400	-0.859514	0.20695411623261067
Translocation protein SEC63, putative OS=Plasmodium falciparum (isolate 3D7) OX=36329 GN=PF3D7_1318800 PE=4 SV=1	P113	-0.916486	0.1549485685911372
Uncharacterized protein OS=Plasmodium falciparum (isolate 3D7) OX=36329 GN=PF3D7_0831400 PE=4 SV=1	PF3D7_0315100	-0.916486	0.1549485685911372
Surface protein P113 OS=Plasmodium falciparum (isolate 3D7) OX=36329 GN=P113 PE=1 SV=1	PF3D7_1454400	-0.916486	0.1549485685911372
Eukaryotic translation initiation factor 4E OS=Plasmodium falciparum (isolate 3D7) OX=36329 GN=PF3D7_0315100 PE=3 SV=1	PF3D7_1438900	-0.916486	0.1549485685911372
Aminopeptidase P OS=Plasmodium falciparum (isolate 3D7) OX=36329 GN=PF3D7_1454400 PE=3 SV=1	ADA	-0.859154	0.091231
Thioredoxin peroxidase 1 OS=Plasmodium falciparum (isolate 3D7) OX=36329 GN=PF3D7_1438900 PE=3 SV=1	PF3D7_0823900	-0.859514	0.20695411623261067
Adenosine deaminase OS=Plasmodium falciparum (isolate 3D7) OX=36329 GN=ADA PE=1 SV=1	PF3D7_1423700	-0.859514	0.20695411623261067
Dicarboxylate/tricarboxylate carrier OS=Plasmodium falciparum (isolate 3D7) OX=36329 GN=PF3D7_0823900 PE=3 SV=1	PF3D7_1118300	-0.916486	0.1549485685911372
NTF2 domain-containing protein OS=Plasmodium falciparum (isolate 3D7) OX=36329 GN=PF3D7_1423700 PE=4 SV=1	PF3D7_0910100	-0.859514	0.20695411623261067
Insulinase, putative OS=Plasmodium falciparum (isolate 3D7) OX=36329 GN=PF3D7_1118300 PE=4 SV=1	PF3D7_0320800	-0.834646	0.22925376055922167
Exportin-7, putative OS=Plasmodium falciparum (isolate 3D7) OX=36329 GN=PF3D7_0910100 PE=4 SV=1	PF3D7_0312400	-0.859514	0.20695411623261067
ATP-dependent RNA helicase DDX6 OS=Plasmodium falciparum (isolate 3D7) OX=36329 GN=PF3D7_0320800 PE=3 SV=1	PF3D7_1358700	-0.916486	0.1549485685911372
Glycogen synthase kinase 3 OS=Plasmodium falciparum (isolate 3D7) OX=36329 GN=PF3D7_0312400 PE=3 SV=2	PF3D7_0806800	-0.916486	0.1549485685911372
YOP1-like protein, putative OS=Plasmodium falciparum (isolate 3D7) OX=36329 GN=PF3D7_1358700 PE=3 SV=1	PF3D7_1015600	-0.916486	0.1549485685911372
V-type proton ATPase subunit a, putative OS=Plasmodium falciparum (isolate 3D7) OX=36329 GN=PF3D7_0806800 PE=3 SV=1	PF3D7_0813400	-0.916486	0.1549485685911372
Heat shock protein 60 OS=Plasmodium falciparum (isolate 3D7) OX=36329 GN=PF3D7_1015600 PE=3 SV=1	PF3D7_0918300	-0.916486	0.1549485685911372
Uncharacterized protein OS=Plasmodium falciparum (isolate 3D7) OX=36329 GN=PF3D7_0813400 PE=4 SV=1	PF3D7_1033400	-0.916486	0.1549485685911372
Eukaryotic translation initiation factor 3 subunit F, putative OS=Plasmodium falciparum (isolate 3D7) OX=36329 GN=PF3D7_0918300 PE=4 SV=1	PF3D7_0532300	-0.916486	0.1549485685911372
Haloacid dehalogenase-like hydrolase OS=Plasmodium falciparum (isolate 3D7) OX=36329 GN=PF3D7_1033400 PE=1 SV=1	PF3D7_0815200	-0.916486	0.1549485685911372
PRESAN domain-containing protein OS=Plasmodium falciparum (isolate 3D7) OX=36329 GN=PF3D7_0532300 PE=4 SV=1	SERA5	-0.859154	0.091231
Importin subunit beta, putative OS=Plasmodium falciparum (isolate 3D7) OX=36329 GN=PF3D7_0815200 PE=4 SV=1	PF3D7_0903400	-0.916486	0.1549485685911372
Serine-repeat antigen protein 5 OS=Plasmodium falciparum (isolate 3D7) OX=36329 GN=SERA5 PE=1 SV=1	PF3D7_1462300	-0.916486	0.1549485685911372
ATP-dependent RNA helicase DDX60, putative OS=Plasmodium falciparum (isolate 3D7) OX=36329 GN=PF3D7_0903400 PE=4 SV=1	PF3D7_1130700	-0.916486	0.1549485685911372
GTP-binding protein, putative OS=Plasmodium falciparum (isolate 3D7) OX=36329 GN=PF3D7_1462300 PE=4 SV=1	PF3D7_1461900	-0.916486	0.1549485685911372
Structural maintenance of chromosomes protein 1, putative OS=Plasmodium falciparum (isolate 3D7) OX=36329 GN=PF3D7_1130700 PE=4 SV=1	PF3D7_1012400	-0.916486	0.1549485685911372
Valyl-tRNA synthetase OS=Plasmodium falciparum (isolate 3D7) OX=36329 GN=PF3D7_1461900 PE=3 SV=1	PF3D7_1338100	-0.916486	0.1549485685911372
Hypoxanthine phosphoribosyltransferase OS=Plasmodium falciparum (isolate 3D7) OX=36329 GN=PF3D7_1012400 PE=3 SV=1	PF3D7_1133800	-0.916486	0.1549485685911372
26S proteasome regulatory subunit RPN3, putative OS=Plasmodium falciparum (isolate 3D7) OX=36329 GN=PF3D7_1338100 PE=3 SV=1	PF3D7_0803700	-0.916486	0.1549485685911372
RNA (Uracil-5-)methyltransferase, putative OS=Plasmodium falciparum (isolate 3D7) OX=36329 GN=PF3D7_1133800 PE=3 SV=2	PF3D7_0511800	-0.916486	0.1549485685911372
Tubulin gamma chain OS=Plasmodium falciparum (isolate 3D7) OX=36329 GN=PF3D7_0803700 PE=3 SV=1	PF3D7_1015800	-0.916486	0.1549485685911372
Inositol-3-phosphate synthase OS=Plasmodium falciparum (isolate 3D7) OX=36329 GN=PF3D7_0511800 PE=3 SV=1	PF3D7_0702500	-0.916486	0.1549485685911372
Ribonucleoside-diphosphate reductase small chain, putative OS=Plasmodium falciparum (isolate 3D7) OX=36329 GN=PF3D7_1015800 PE=3 SV=2	PF3D7_0807900	-0.916486	0.1549485685911372
Uncharacterized protein OS=Plasmodium falciparum (isolate 3D7) OX=36329 GN=PF3D7_0702500 PE=4 SV=1
Tyrosine--tRNA ligase OS=Plasmodium falciparum (isolate 3D7) OX=36329 GN=PF3D7_0807900 PE=1 SV=1
