# Supplementary material for: An Essential Adaptor for Apicoplast Fission and Inheritance in Malaria Parasites
Source: Research Square preprint supplement (doi:10.21203/rs.3.rs-6457426/v1), 2025-05-05
Supplement: Supplementary file 3 [file c9d3e8e287e7a361f1188be5.xlsx]

## Sheet: Insoluble
unsoluble
	reference	Gene Symbol	MWT(kDa)	MCMBP-BirA #1	3D7 #1		reference	Gene Symbol	MWT(kDa)	MCMBP-BirA #2	Total 3D7	3D7#2
	Q8ILX3_Q8ILX3_PLAF7	PF14_0120	112.7	46	0		Q8ILX3_Q8ILX3_PLAF7	PF14_0120	112.7	51	0
	Q8IEE5_Q8IEE5_PLAF7	PF13_0095	115.14	24	0		Q8I492_Q8I492_PLAF7	MESA	168.19	21	20
	Q8IC16_Q8IC16_PLAF7	PF07_0023	94.18	18	0		Q8IBY8_Q8IBY8_PLAF7	PF07_0042	350.48	22	0
	Q8I5T4_Q8I5T4_PLAF7	PFL0580w	85.8	17	0		Q8IEE5_Q8IEE5_PLAF7	PF13_0095	115.14	20	0
	Q8IC05_Q8IC05_PLAF7	PF07_0029	86.11	18	0		C6KSX8_C6KSX8_PLAF7	PFF0660w	123.65	16	0
	Q8I0P6_Q8I0P6_PLAF7	PF13_0304	48.93	18	1		Q8IC16_Q8IC16_PLAF7	PF07_0023	94.18	15	0
	C6KSX8_C6KSX8_PLAF7	PFF0660w	123.65	16	0		Q8IC05_Q8IC05_PLAF7	PF07_0029	86.11	15	2
	Q8IDF0_Q8IDF0_PLAF7	PF13_0291	105.61	14	0		Q8I0U8_Q8I0U8_PLAF7	MSP1	195.6	13	6
	C0H5I2_C0H5I2_PLAF7	MAL13P1.266	190.17	13	0		Q8IDF0_Q8IDF0_PLAF7	PF13_0291	105.61	15	0
	Q8IB24_Q8IB24_PLAF7	PF08_0054	73.87	10	2		Q8I2X4_Q8I2X4_PLAF7	PFI0875w	72.34	9	11
	Q8IBY8_Q8IBY8_PLAF7	PF07_0042	350.48	10	0		Q8IB24_Q8IB24_PLAF7	PF08_0054	73.87	12	8
	Q8I3J5_Q8I3J5_PLAF7	PFE1345c	109.73	9	0		Q8I0P6_Q8I0P6_PLAF7	PF13_0304	48.93	9	9
	Q8I492_Q8I492_PLAF7	MESA	168.19	4	7		C0H5I2_C0H5I2_PLAF7	MAL13P1.266	190.17	11	0
	Q8IKE1_Q8IKE1_PLAF7	ACC1	394.63	9	4		Q8IIV2_Q8IIV2_PLAF7	PF11_0061	11.45	8	17
	Q8IIV1_Q8IIV1_PLAF7	PF11_0062	13.12	4	5		Q8II24_Q8II24_PLAF7	PF11_0351	73.25	7	8
	Q8IIV2_Q8IIV2_PLAF7	PF11_0061	11.45	4	5		Q8ILR7_Q8ILR7_PLAF7	PF14_0177	111.43	9	0
	Q8I4X0_ACT1_PLAF7	PFL2215w	41.84	8	0		Q8I5T4_Q8I5T4_PLAF7	PFL0580w	85.8	9	0
	Q8IKK7_Q8IKK7_PLAF7	GAPDH	36.61	6	0		C0H571_C0H571_PLAF7	RhopH2	162.56	8	4
	Q76NM3_Q76NM3_PLAF7	PfLDH	34.09	6	0		Q8IIV1_Q8IIV1_PLAF7	PF11_0062	13.12	6	8
	Q6LFH8_OAT_PLAF7	OAT	46.03	6	0		Q8IKE1_Q8IKE1_PLAF7	ACC1	394.63	5	6
	Q7KQK6_Q7KQK6_PLAF7	Ran	24.86	4	0		Q8IKK7_Q8IKK7_PLAF7	GAPDH	36.61	6	4
	Q8IDQ9_Q8IDQ9_PLAF7	PfPMT	31.02	4	0		Q8IIF0_Q8IIF0_PLAF7	PF11_0224	17.28	6	3
	Q8IL80_Q8IL80_PLAF7	TPx1	21.79	4	0		C6KT13_C6KT13_PLAF7	PFF0835w	52.95	4	5
	Q8ILQ3_Q8ILQ3_PLAF7	PF14_0191	59.66	4	0		Q7KQM4_PLM1_PLAF7	PF14_0076	51.43	3	5
	Q8ILA4_Q8ILA4_PLAF7	PF14_0341	67.33	4	0		Q8I3J5_Q8I3J5_PLAF7	PFE1345c	109.73	6	0
	C0H4V6_C0H4V6_PLAF7	MAL8P1.69	30.17	4	0		Q8ILQ3_Q8ILQ3_PLAF7	PF14_0191	59.66	6	0
	Q8IKF0_Q8IKF0_PLAF7	H45	45.28	4	0		O97320_O97320_PLAF7	PFC0920w	16.44	7	6
	O97320_O97320_PLAF7	PFC0920w	16.44	4	2		Q8IJD0_Q8IJD0_PLAF7	PF10_0268	43.9	5	5
	Q8IIU8_Q8IIU8_PLAF7	PF11_0065	29.75	3	1		Q76NM3_Q76NM3_PLAF7	PfLDH	34.09	5	4
	Q8IB67_Q8IB67_PLAF7	gcn5	170.81	3	0		Q8IJ34_Q8IJ34_PLAF7	PF10_0366	33.7	4	5
	Q8ILV2_Q8ILV2_PLAF7	PF14_0141	25.2	3	0		Q8I0V4_Q8I0V4_PLAF7	PFL1070c	94.96	4	4
	Q8I5E0_Q8I5E0_PLAF7	PFL1345c	129.12	3	0		Q8IDH5_Q8IDH5_PLAF7	PF13_0272	23.97	5	3
	C6KTA4_C6KTA4_PLAF7	PFF1300w	55.63	3	0		C0H4Y6_C0H4Y6_PLAF7	PfPDI-8	55.48	4	2
	Q8IJ32_Q8IJ32_PLAF7	PF10_0368	81.47	3	0		Q8I5G0_Q8I5G0_PLAF7	PFL1240c	177.96	5	0
	Q8I6T2_Q8I6T2_PLAF7	PF13_0242	53.56	3	1		C6KSV0_C6KSV0_PLAF7	PFF0510w	15.44	6	4
	C6KT18_C6KT18_PLAF7	PFF0860c	14.11	2	2		Q8IJN7_ENO_PLAF7	ENO	48.65	4	3
	Q7KQL5_TBB_PLAF7	PF10_0084	49.72	3	0		Q6LFH8_OAT_PLAF7	OAT	46.03	4	3
	Q8IKH8_Q8IKH8_PLAF7	PF14_0627	24.65	3	0		Q8IFM0_Q8IFM0_PLAF7	PFD1170c	35.94	4	3
	Q8IIF0_Q8IIF0_PLAF7	PF11_0224	17.28	1	2		Q8IL80_Q8IL80_PLAF7	TPx1	21.79	3	3
	Q8ILR7_Q8ILR7_PLAF7	PF14_0177	111.43	2	0		Q8IBV7_Q8IBV7_PLAF7	PF07_0054	13.75	3	3
	Q8I0V2_Q8I0V2_PLAF7	PFL1725w	58.36	2	0		Q8I0V3_Q8I0V3_PLAF7	PFL1545c	81.43	4	2
	Q8IET7_Q8IET7_PLAF7	PF13_0014	22.47	2	0		Q8IKH8_Q8IKH8_PLAF7	PF14_0627	24.65	3	1
	Q8I241_Q8I241_PLAF7	PFA_0505c	29.67	2	0		Q8IB67_Q8IB67_PLAF7	gcn5	170.81	4	0
	O96223_O96223_PLAF7	PFB0650w	293.7	2	0		Q8IL56_Q8IL56_PLAF7	PF14_0393	58.75	4	0
	Q8IKM5_Q8IKM5_PLAF7	PF14_0579	16.73	2	0		C0H4A6_C0H4A6_PLAF7	PFD0770c	24.12	4	0
	C0H522_C0H522_PLAF7	PFI0330c	95.45	0	3		Q8IIV8_Q8IIV8_PLAF7	PF11_0055	49.23	1	3
	Q8IB51_Q8IB51_PLAF7	PF08_0039	16.37	1	1		Q8I2X3_Q8I2X3_PLAF7	GAP50	44.58	3	1
	Q8I3V8_Q8I3V8_PLAF7	PFE0750c	98.32	2	0		Q8IKR1_Q8IKR1_PLAF7	PF14_0541	76.37	3	3
	Q8IE09_Q8IE09_PLAF7	PF13_0171	14.98	1	1		Q8IFP2_Q8IFP2_PLAF7	PFD1055w	19.71	3	2
	C6KST7_C6KST7_PLAF7	PFF0445w	720.06	2	0		Q8IB72_Q8IB72_PLAF7	PF08_0032	76.63	3	2
	Q8IK99_Q8IK99_PLAF7	PF14_0707	101.22	1	1		Q7KQK6_Q7KQK6_PLAF7	Ran	24.86	2	3
	Q8ILN9_Q8ILN9_PLAF7	PF14_0204	150.62	2	0		O77395_O77395_PLAF7	PFC0735w	14.86	3	2
	Q8IJE4_Q8IJE4_PLAF7	PF10_0254	154.45	2	0		Q8IDQ9_Q8IDQ9_PLAF7	PfPMT	31.02	3	2
	Q8I2W2_Q8I2W2_PLAF7	PFI0935w	43.23	1	0		Q8IJZ7_Q8IJZ7_PLAF7	PF10_0043	23.74	3	2
	Q8ID50_Q8ID50_PLAF7	PF13_0346	14.61	1	0		Q8IM10_Q8IM10_PLAF7	PF14_0083	25.04	3	1
	Q8I5G0_Q8I5G0_PLAF7	PFL1240c	177.96	1	0		C0H516_C0H516_PLAF7	Rab7	23.77	2	2
	Q8IJC6_Q8IJC6_PLAF7	PF10_0272	44.19	1	0		Q8ID50_Q8ID50_PLAF7	PF13_0346	14.61	3	1
	C6KT82_C6KT82_PLAF7	PFF1185w	315.42	1	0		Q8I6U8_GBP_PLAF7	GBP	95.79	3	1
	Q8I3J9_Q8I3J9_PLAF7	PFE1325w	524.97	0	1		Q8I328_Q8I328_PLAF7	PFI0605c	52.67	3	1
	C0H5C2_C0H5C2_PLAF7	MAL13P1.92	16.75	1	0		Q76NM4_Q76NM4_PLAF7	Rab11a	24.74	1	3
	Q8I3T9_Q8I3T9_PLAF7	PFE0845c	27.98	1	0		Q8II73_Q8II73_PLAF7	PF11_0301	36.57	2	2
	Q8ID96_Q8ID96_PLAF7	PF13_0323	85.5	1	0		Q8I2P8_Q8I2P8_PLAF7	PFI1280c	366.73	4	0
	Q8II73_Q8II73_PLAF7	PF11_0301	36.57	1	0		Q8IB31_Q8IB31_PLAF7	MAL8P1.62	32.15	3	1
	Q8IAX8_Q8IAX8_PLAF7	PF08_0074	27.24	1	0		Q8IIU8_Q8IIU8_PLAF7	PF11_0065	29.75	3	1
	O97239_DOP1_PLAF7	PFC0245c	467.59	1	0		Q8IDV1_Q8IDV1_PLAF7	PF13_0213	25.52	2	2
	Q8IM10_Q8IM10_PLAF7	PF14_0083	25.04	1	0		Q7K6A5_Q7K6A5_PLAF7	PfMDR1	162.15	2	2
	O77395_O77395_PLAF7	PFC0735w	14.86	1	0		Q8IDS6_Q8IDS6_PLAF7	PF13_0224	21.73	3	1
	Q8IDH5_Q8IDH5_PLAF7	PF13_0272	23.97	1	0		Q8IKC8_Q8IKC8_PLAF7	EXP-2	33.39	1	3
	C6KT20_C6KT20_PLAF7	PFF0870w	92.7	1	0		C0H4C9_C0H4C9_PLAF7	PFE0320w	469.59	4	0
	Q8IJN7_ENO_PLAF7	ENO	48.65	0	1		Q8IDR9_Q8IDR9_PLAF7	PF13_0228	35.36	2	1
	C6KSV0_C6KSV0_PLAF7	PFF0510w	15.44	1	0		Q8IKF0_Q8IKF0_PLAF7	H45	45.28	3	0
	Q8IJZ3_Q8IJZ3_PLAF7	PF10_0047	106.23	1	0		C0H4V6_C0H4V6_PLAF7	MAL8P1.69	30.17	1	2
	Q76NN8_Q76NN8_PLAF7	PFA_0310c	139.33	1	0		Q8I241_Q8I241_PLAF7	PFA_0505c	29.67	3	0
	Q8IIP9_Q8IIP9_PLAF7	GS27	34.05	1	0		Q8IJG6_Q8IJG6_PLAF7	PF10_0232	381.02	3	0
	Q8IJR6_Q8IJR6_PLAF7	PF10_0126	43.49	1	0		C6KT18_C6KT18_PLAF7	PFF0860c	14.11	2	5
	Q8IFP3_Q8IFP3_PLAF7	PFD1050w	49.66	1	0		Q8ILZ1_Q8ILZ1_PLAF7	PF14_0102	90	2	3
	Q8IE83_Q8IE83_PLAF7	PF13_0131	42.57	1	0		Q8I488_Q8I488_PLAF7	PFE0060w	48.69	2	2
	Q8IJ34_Q8IJ34_PLAF7	PF10_0366	33.7	1	0		Q8I2F2_Q8I2F2_PLAF7	PFI1780w	45.47	2	2
	Q8IL47_Q8IL47_PLAF7	PF14_0402	249.45	1	0		Q8IDB0_Q8IDB0_PLAF7	PF13_0316	17.24	2	2
	Q8II24_Q8II24_PLAF7	PF11_0351	73.25	0	1		Q8I6V3_Q8I6V3_PLAF7	PF14_0077	51.45	1	2
	Q8I3U6_Q8I3U6_PLAF7	PFE0810c	16.07	1	0		Q8I3F3_Q8I3F3_PLAF7	ETRAMP5	19.02	1	2
	Q8IBW8_Q8IBW8_PLAF7	VAR	256.38	0	1		Q8IM16_Q8IM16_PLAF7	PF14_0075	51.01	2	1
	Q8I5X5_Q8I5X5_PLAF7	PFL0350c	311.23	0	1		Q8III6_Q8III6_PLAF7	PF11_0188	108.4	2	1
	Q7KWJ5_Q7KWJ5_PLAF7	HT1	56.38	1	0		C6KTA4_C6KTA4_PLAF7	PFF1300w	55.63	2	1
	Q8IBG4_Q8IBG4_PLAF7	MAL7P1.160	19.89	0	1		C6KT34_C6KT34_PLAF7	PFF0940c	92.33	1	2
	Q8IJI2_Q8IJI2_PLAF7	PF10_0215	74.8	1	0		Q8I206_Q8I206_PLAF7	PFD0090c	49.71	1	2
	Q8IEB3_Q8IEB3_PLAF7	PF13_0116	149.08	1	0		Q8I5A9_Q8I5A9_PLAF7	Rab2	24.41	2	1
	Q8IL32_Q8IL32_PLAF7	PF14_0417	106.93	1	0		C0H4U4_C0H4U4_PLAF7	MAL8P1.95	36.23	2	1
	O96160_YPF14_PLAF7	PFB0315w	207.71	0	1		Q8IL71_Q8IL71_PLAF7	PF14_0377	27.67	2	1
	C6KT74_C6KT74_PLAF7	PfTKL-5	279.61	0	1		Q8I490_Q8I490_PLAF7	PFE0050w	30.7	1	2
	Q8IBV7_Q8IBV7_PLAF7	PF07_0054	13.75	1	0		Q8I546_Q8I546_PLAF7	PFL1825w	23.64	1	2
							Q8IE43_Q8IE43_PLAF7	PF13_0154	38.75	3	0
							Q8I2W2_Q8I2W2_PLAF7	PFI0935w	43.23	1	1
							Q76NN8_Q76NN8_PLAF7	PFA_0310c	139.33	2	0
							Q8ILA4_Q8ILA4_PLAF7	PF14_0341	67.33	2	0
							Q8IKT5_Q8IKT5_PLAF7	PF14_0517	88.45	1	1
							Q8IM15_Q8IM15_PLAF7	PF14_0078	51.66	2	0
							Q8ILL3_Q8ILL3_PLAF7	PF14_0230	33.98	2	0
							Q8II93_Q8II93_PLAF7	PF11_0281	34.44	0	2
							Q8IJR6_Q8IJR6_PLAF7	PF10_0126	43.49	2	0
							Q8IJX8_Q8IJX8_PLAF7	PF10_0063	11.97	0	2
							Q8IIJ4_Q8IIJ4_PLAF7	PF11_0179	15.25	0	2
							Q8I5S6_Q8I5S6_PLAF7	PFL0625c	165.96	1	1
							O96258_O96258_PLAF7	PFB0830w	12.5	0	2
							Q8IB78_Q8IB78_PLAF7	MAL8P1.32	67.6	2	0
							Q8IJ32_Q8IJ32_PLAF7	PF10_0368	81.47	2	0
							Q8IAX8_Q8IAX8_PLAF7	PF08_0074	27.24	2	0
							Q8IJW6_Q8IJW6_PLAF7	ApiAP2	182.55	2	0
							Q8ILG6_Q8ILG6_PLAF7	PF14_0277	159.87	2	0
							Q8I3A1_Q8I3A1_PLAF7	PFI0235w	56.2	2	0
							C0H5L6_C0H5L6_PLAF7	MAL13P1.351	346.59	0	2
							Q8I3R0_Q8I3R0_PLAF7	PFE1005w	22.11	2	0
							Q8I5E0_Q8I5E0_PLAF7	PFL1345c	129.12	2	0
							Q8IJK6_Q8IJK6_PLAF7	PF10_0189	145.74	0	2
							Q8IL47_Q8IL47_PLAF7	PF14_0402	249.45	2	0
							Q8IC43_Q8IC43_PLAF7	PF07_0007	14.19	0	2
							O96223_O96223_PLAF7	PFB0650w	293.7	4	0
							C0H592_C0H592_PLAF7	REX2	10.76	1	1
							Q8I5B2_Q8I5B2_PLAF7	PFL1485w	71.26	1	1
							Q8IDI5_Q8IDI5_PLAF7	PF13_0268	23.4	1	1
							Q8ILV2_Q8ILV2_PLAF7	PF14_0141	25.2	1	1
							Q8I6T2_Q8I6T2_PLAF7	PF13_0242	53.56	1	1
							Q8I3R6_Q8I3R6_PLAF7	PFE0975c	15.38	1	1
							Q8I5K4_Q8I5K4_PLAF7	PFL1005c	31	1	1
							Q7KQL5_TBB_PLAF7	PF10_0084	49.72	1	1
							Q8IL58_Q8IL58_PLAF7	PF14_0391	24.79	1	1
							Q8IM09_Q8IM09_PLAF7	PF14_0084	851.35	2	0
							Q8IE22_Q8IE22_PLAF7	MAL13P1.163	32.78	1	1
							Q76NN7_Q76NN7_PLAF7	PfCyP19	18.94	1	1
							Q8IDB8_Q8IDB8_PLAF7	MAL13P1.288	18.41	1	1
							Q8II62_Q8II62_PLAF7	PF11_0312	10.31	1	1
							Q8I240_Q8I240_PLAF7	PFA_0510w	268.04	1	0
							O00806_RLA2_PLAF7	MAL3P3.19	11.94	0	1
							Q8I467_CADF1_PLAF7	PFE0165w	13.73	1	0
							Q8I420_Q8I420_PLAF7	PfoTPT	39.01	0	1
							Q8I2Q0_Q8I2Q0_PLAF7	PFI1270w	24.68	0	1
							O97250_O97250_PLAF7	PFC0300c	30.5	1	0
							Q8IKW5_Q8IKW5_PLAF7	PF14_0486	93.46	1	0
							Q8I4U7_Q8I4U7_PLAF7	PFL2335w	231.17	1	0
							Q8IJN9_Q8IJN9_PLAF7	PF10_0153	62.51	1	0
							Q8I3T9_Q8I3T9_PLAF7	PFE0845c	27.98	1	0
							Q8I526_Q8I526_PLAF7	PFL1925w	100.9	0	1
							C6KSS4_C6KSS4_PLAF7	PFF0375c	101.17	1	0
							Q8I431_Q8I431_PLAF7	PFE0350c	46.18	1	0
							Q8IIK1_Q8IIK1_PLAF7	PF11_0172	51.32	1	0
							Q8ILL2_Q8ILL2_PLAF7	PF14_0231	32.66	1	0
							Q8ILK3_Q8ILK3_PLAF7	PF14_0240	18.78	1	0
							Q8I5T2_Q8I5T2_PLAF7	PFL0595c	23.94	1	0
							Q8I446_Q8I446_PLAF7	PFE0275w	40.18	1	0
							C6KTC7_C6KTC7_PLAF7	PFF1415c	44.64	1	0
							Q8IE84_Q8IE84_PLAF7	PF13_0130	14.18	1	0
							C0H5E4_C0H5E4_PLAF7	MAL13P1.154	39.88	0	1
							Q8I335_GUF1_PLAF7	PFI0570w	126.85	0	1
							Q8IE67_Q8IE67_PLAF7	PF13_0143	49.35	1	0
							Q8IJS7_Q8IJS7_PLAF7	PF10_0115	131.55	1	0
							P62344_CDPK1_PLAF7	CPK1	60.76	1	0
							Q8IDX1_Q8IDX1_PLAF7	MAL13P1.179	46.99	1	0
							Q8IIP9_Q8IIP9_PLAF7	GS27	34.05	1	0
							C6KSY6_C6KSY6_PLAF7	PFF0700c	21.57	0	1
							Q8IJX3_Q8IJX3_PLAF7	PF10_0068	29.51	0	1
							Q8IBA0_Q8IBA0_PLAF7	PfRACK	35.66	1	0
							Q8I538_Q8I538_PLAF7	PFL1865w	212.63	1	0
							Q8IIA2_Q8IIA2_PLAF7	PF11_0272	17.88	1	0
							Q8IB73_Q8IB73_PLAF7	PF08_0031	35.36	0	1
							Q8I484_Q8I484_PLAF7	RAP2	46.71	1	0
							Q8IKS2_Q8IKS2_PLAF7	PF14_0530	224.58	1	0
							C6S3J6_C6S3J6_PLAF7	PF14_0575a	8.01	0	1
							Q8I485_Q8I485_PLAF7	RAP3	46.97	1	0
							Q8IET7_Q8IET7_PLAF7	PF13_0014	22.47	0	1
							Q8I4W4_Q8I4W4_PLAF7	PFL2245w	30.6	1	0
							Q8IJU2_Q8IJU2_PLAF7	PF10_0100	13.73	1	0
							Q6ZMA8_Q6ZMA8_PLAF7	PFD0305c	55.75	1	0
							Q8IAK2_Q8IAK2_PLAF7	VAR	330.49	0	1
							O96133_YB145_PLAF7	PFB0145c	237.6	0	1
							O97324_O97324_PLAF7	VAR	250.32	1	0
							Q8IJV6_Q8IJV6_PLAF7	PF10_0086	27.59	1	0
							Q8IDM6_Q8IDM6_PLAF7	nt1	47.6	1	0
							Q8I487_Q8I487_PLAF7	PfSBP1	36.28	1	0
							C0H5C2_C0H5C2_PLAF7	MAL13P1.92	16.75	1	0
							Q8IBH9_Q8IBH9_PLAF7	PF07_0115	224.93	1	0
							Q8IIC8_Q8IIC8_PLAF7	PF11_0246	153.6	1	0
							Q8IKZ6_Q8IKZ6_PLAF7	PfMDR2	118.94	1	0
							Q8IK07_Q8IK07_PLAF7	PF10_0033	14.51	1	0
							Q8IHR8_Q8IHR8_PLAF7	Rab6	23.59	1	0

## Sheet: Insoluble_PCA Analysis
Reference	Gene Symbol	MWT(kDa)	MCMBP-BirA #1	MCMBP-BirA #2	3D7-birA #1	3D7-birA #2		Reference	Gene Symbol	PC1	PC2
Q8ILX3_Q8ILX3_PLAF7	PF14_0120	112.7	46	51	0	0		Q8ILX3_Q8ILX3_PLAF7	PF14_0120	6.430655656130485	6.582612439206888
Q8IEE5_Q8IEE5_PLAF7	PF13_0095	115.14	24	20	0	0		Q8IEE5_Q8IEE5_PLAF7	PF13_0095	2.301081831223191	3.006308020088493
Q8IC16_Q8IC16_PLAF7	PF07_0023	94.18	18	15	0	0		Q8IC16_Q8IC16_PLAF7	PF07_0023	1.4572803436001256	2.227539098337316
Q8I5T4_Q8I5T4_PLAF7	PFL0580w	85.8	17	9	0	0		Q8I5T4_Q8I5T4_PLAF7	PFL0580w	0.8942166814659638	1.8037262576030824
Q8IC05_Q8IC05_PLAF7	PF07_0029	86.11	18	15	0	2		Q8IC05_Q8IC05_PLAF7	PF07_0029	1.7550486474546922	1.9301481306448098
Q8I0P6_Q8I0P6_PLAF7	PF13_0304	48.93	18	9	1	9		Q8I0P6_Q8I0P6_PLAF7	PF13_0304	2.6758213869752274	0.0907732
C6KSX8_C6KSX8_PLAF7	PFF0660w	123.65	16	16	0	0		C6KSX8_C6KSX8_PLAF7	PFF0660w	1.3940416098919572	2.1197006941109424
Q8IDF0_Q8IDF0_PLAF7	PF13_0291	105.61	14	15	0	0		Q8IDF0_Q8IDF0_PLAF7	PF13_0291	1.1672815545591486	1.8980488626165555
C0H5I2_C0H5I2_PLAF7	MAL13P1.266	190.17	13	11	0	0		C0H5I2_C0H5I2_PLAF7	MAL13P1.266	0.7677392140496251	1.588049449150337
Q8IB24_Q8IB24_PLAF7	PF08_0054	73.87	10	12	2	8		Q8IB24_Q8IB24_PLAF7	PF08_0054	2.5613692803064207	-0.705858
Q8IBY8_Q8IBY8_PLAF7	PF07_0042	350.48	10	22	0	0		Q8IBY8_Q8IBY8_PLAF7	PF07_0042	1.449607391204408	1.9669056223338461
Q8I3J5_Q8I3J5_PLAF7	PFE1345c	109.73	9	6	0	0		Q8I3J5_Q8I3J5_PLAF7	PFE1345c	0.0689371	0.9740256452595418
Q8I492_Q8I492_PLAF7	MESA	168.19	4	21	7	20		Q8I492_Q8I492_PLAF7	MESA	6.494565071700593	-4.75761
Q8IKE1_Q8IKE1_PLAF7	ACC1	394.63	9	5	4	6		Q8IKE1_Q8IKE1_PLAF7	ACC1	2.3570719353123186	-1.80332
Q8IIV1_Q8IIV1_PLAF7	PF11_0062	13.12	4	6	5	8		Q8IIV1_Q8IIV1_PLAF7	PF11_0062	2.743250054581454	-2.91273
Q8IIV2_Q8IIV2_PLAF7	PF11_0061	11.45	4	8	5	17		Q8IIV2_Q8IIV2_PLAF7	PF11_0061	4.246728743551641	-4.13718
Q8I4X0_ACT1_PLAF7	PFL2215w	41.84	8	0	0	0		Q8I4X0_ACT1_PLAF7	PFL2215w	-0.494127	0.5502128045253089
Q8IKK7_Q8IKK7_PLAF7	GAPDH	36.61	6	6	0	4		Q8IKK7_Q8IKK7_PLAF7	GAPDH	0.44697463687544603	0.13212603308396165
Q76NM3_Q76NM3_PLAF7	PfLDH	34.09	6	5	0	4		Q76NM3_Q76NM3_PLAF7	PfLDH	0.36521397606312633	0.0752193
Q6LFH8_OAT_PLAF7	OAT	46.03	6	4	0	3		Q6LFH8_OAT_PLAF7	OAT	0.13456916332352362	0.16700808966219993
Q7KQK6_Q7KQK6_PLAF7	Ran	24.86	4	2	0	3		Q7KQK6_Q7KQK6_PLAF7	Ran	-0.173952	-0.11155
Q8IDQ9_Q8IDQ9_PLAF7	PfPMT	31.02	4	3	0	2		Q8IDQ9_Q8IDQ9_PLAF7	PfPMT	-0.241075	0.0940517
Q8IL80_Q8IL80_PLAF7	TPx1	21.79	4	3	0	3		Q8IL80_Q8IL80_PLAF7	TPx1	-0.0921909	-0.0546437
Q8ILQ3_Q8ILQ3_PLAF7	PF14_0191	59.66	4	6	0	0		Q8ILQ3_Q8ILQ3_PLAF7	PF14_0191	-0.293561	0.5621628506085925
Q8ILA4_Q8ILA4_PLAF7	PF14_0341	67.33	4	2	0	0		Q8ILA4_Q8ILA4_PLAF7	PF14_0341	-0.620604	0.3345359960725638
C0H4V6_C0H4V6_PLAF7	MAL8P1.69	30.17	4	1	0	2		C0H4V6_C0H4V6_PLAF7	MAL8P1.69	-0.404596	-0.0197617
Q8IKF0_Q8IKF0_PLAF7	H45	45.28	4	3	0	0		Q8IKF0_Q8IKF0_PLAF7	H45	-0.538843	0.39144270970657097
O97320_O97320_PLAF7	PFC0920w	16.44	4	7	2	6		O97320_O97320_PLAF7	PFC0920w	1.419799488828789	-1.18724
Q8IIU8_Q8IIU8_PLAF7	PF11_0065	29.75	3	3	1	1		Q8IIU8_Q8IIU8_PLAF7	PF11_0065	-0.0933113	-0.296692
Q8IB67_Q8IB67_PLAF7	gcn5	170.81	3	4	0	0		Q8IB67_Q8IB67_PLAF7	gcn5	-0.529582	0.36597686441038824
Q8ILV2_Q8ILV2_PLAF7	PF14_0141	25.2	3	1	0	1		Q8ILV2_Q8ILV2_PLAF7	PF14_0141	-0.62598	0.0465612
Q8I5E0_Q8I5E0_PLAF7	PFL1345c	129.12	3	2	0	0		Q8I5E0_Q8I5E0_PLAF7	PFL1345c	-0.693104	0.2521634371423739
C6KTA4_C6KTA4_PLAF7	PFF1300w	55.63	3	2	0	1		C6KTA4_C6KTA4_PLAF7	PFF1300w	-0.54422	0.1034679532961212
Q8IJ32_Q8IJ32_PLAF7	PF10_0368	81.47	3	2	0	0		Q8IJ32_Q8IJ32_PLAF7	PF10_0368	-0.693104	0.2521634371423739
Q8I6T2_Q8I6T2_PLAF7	PF13_0242	53.56	3	1	1	1		Q8I6T2_Q8I6T2_PLAF7	PF13_0242	-0.256833	-0.410505
C6KT18_C6KT18_PLAF7	PFF0860c	14.11	2	2	2	5		C6KT18_C6KT18_PLAF7	PFF0860c	0.7171126383194184	-1.48782
Q7KQL5_TBB_PLAF7	PF10_0084	49.72	3	1	0	1		Q7KQL5_TBB_PLAF7	PF10_0084	-0.62598	0.0465612
Q8IKH8_Q8IKH8_PLAF7	PF14_0627	24.65	3	3	0	1		Q8IKH8_Q8IKH8_PLAF7	PF14_0627	-0.462459	0.16037466693012842
Q8IIF0_Q8IIF0_PLAF7	PF11_0224	17.28	1	6	2	3		Q8IIF0_Q8IIF0_PLAF7	PF11_0224	0.6738872804538868	-1.04517
Q8ILR7_Q8ILR7_PLAF7	PF14_0177	111.43	2	9	0	0		Q8ILR7_Q8ILR7_PLAF7	PF14_0177	-0.193279	0.568138
Q8I0V2_Q8I0V2_PLAF7	PFL1725w	58.36	2	0	0	0		Q8I0V2_Q8I0V2_PLAF7	PFL1725w	-0.929125	0.0559775
Q8IET7_Q8IET7_PLAF7	PF13_0014	22.47	2	0	0	1		Q8IET7_Q8IET7_PLAF7	PF13_0014	-0.780241	-0.092718
Q8I241_Q8I241_PLAF7	PFA_0505c	29.67	2	3	0	0		Q8I241_Q8I241_PLAF7	PFA_0505c	-0.683843	0.22669759184619126
O96223_O96223_PLAF7	PFB0650w	293.7	2	4	0	0		O96223_O96223_PLAF7	PFB0650w	-0.602082	0.28360430548019844
Q8IKM5_Q8IKM5_PLAF7	PF14_0579	16.73	2	0	0	0		Q8IKM5_Q8IKM5_PLAF7	PF14_0579	-0.929125	0.0559775
C0H522_C0H522_PLAF7	PFI0330c	95.45	0	1	3	3		C0H522_C0H522_PLAF7	PFI0330c	0.5617319200355169	-1.86915
Q8IB51_Q8IB51_PLAF7	PF08_0039	16.37	1	0	1	0		Q8IB51_Q8IB51_PLAF7	PF08_0039	-0.632477	-0.483461
Q8I3V8_Q8I3V8_PLAF7	PFE0750c	98.32	2	0	0	0		Q8I3V8_Q8I3V8_PLAF7	PFE0750c	-0.929125	0.0559775
Q8IE09_Q8IE09_PLAF7	PF13_0171	14.98	1	0	1	0		Q8IE09_Q8IE09_PLAF7	PF13_0171	-0.632477	-0.483461
C6KST7_C6KST7_PLAF7	PFF0445w	720.06	2	0	0	0		C6KST7_C6KST7_PLAF7	PFF0445w	-0.929125	0.0559775
Q8IK99_Q8IK99_PLAF7	PF14_0707	101.22	1	0	1	0		Q8IK99_Q8IK99_PLAF7	PF14_0707	-0.632477	-0.483461
Q8ILN9_Q8ILN9_PLAF7	PF14_0204	150.62	2	0	0	0		Q8ILN9_Q8ILN9_PLAF7	PF14_0204	-0.929125	0.0559775
Q8IJE4_Q8IJE4_PLAF7	PF10_0254	154.45	2	0	0	0		Q8IJE4_Q8IJE4_PLAF7	PF10_0254	-0.929125	0.0559775
Q8I2W2_Q8I2W2_PLAF7	PFI0935w	43.23	1	1	0	1		Q8I2W2_Q8I2W2_PLAF7	PFI0935w	-0.77098	-0.118184
Q8ID50_Q8ID50_PLAF7	PF13_0346	14.61	1	3	0	1		Q8ID50_Q8ID50_PLAF7	PF13_0346	-0.607458	-0.00437045
Q8I5G0_Q8I5G0_PLAF7	PFL1240c	177.96	1	5	0	0		Q8I5G0_Q8I5G0_PLAF7	PFL1240c	-0.592821	0.2581384601840156
Q8IJC6_Q8IJC6_PLAF7	PF10_0272	44.19	1	0	0	0		Q8IJC6_Q8IJC6_PLAF7	PF10_0272	-1.00162	-0.0263951
C6KT82_C6KT82_PLAF7	PFF1185w	315.42	1	0	0	0		C6KT82_C6KT82_PLAF7	PFF1185w	-1.00162	-0.0263951
Q8I3J9_Q8I3J9_PLAF7	PFE1325w	524.97	0	0	1	0		Q8I3J9_Q8I3J9_PLAF7	PFE1325w	-0.704976	-0.565834
C0H5C2_C0H5C2_PLAF7	MAL13P1.92	16.75	1	0	0	0		C0H5C2_C0H5C2_PLAF7	MAL13P1.92	-1.00162	-0.0263951
Q8I3T9_Q8I3T9_PLAF7	PFE0845c	27.98	1	0	0	0		Q8I3T9_Q8I3T9_PLAF7	PFE0845c	-1.00162	-0.0263951
Q8ID96_Q8ID96_PLAF7	PF13_0323	85.5	1	0	0	0		Q8ID96_Q8ID96_PLAF7	PF13_0323	-1.00162	-0.0263951
Q8II73_Q8II73_PLAF7	PF11_0301	36.57	1	2	0	2		Q8II73_Q8II73_PLAF7	PF11_0301	-0.540335	-0.209973
Q8IAX8_Q8IAX8_PLAF7	PF08_0074	27.24	1	2	0	0		Q8IAX8_Q8IAX8_PLAF7	PF08_0074	-0.838103	0.0874183
O97239_DOP1_PLAF7	PFC0245c	467.59	1	0	0	0		O97239_DOP1_PLAF7	PFC0245c	-1.00162	-0.0263951
Q8IM10_Q8IM10_PLAF7	PF14_0083	25.04	1	3	0	1		Q8IM10_Q8IM10_PLAF7	PF14_0083	-0.607458	-0.00437045
O77395_O77395_PLAF7	PFC0735w	14.86	1	3	0	2		O77395_O77395_PLAF7	PFC0735w	-0.458574	-0.153066
Q8IDH5_Q8IDH5_PLAF7	PF13_0272	23.97	1	5	0	3		Q8IDH5_Q8IDH5_PLAF7	PF13_0272	-0.146169	-0.187948
C6KT20_C6KT20_PLAF7	PFF0870w	92.7	1	0	0	0		C6KT20_C6KT20_PLAF7	PFF0870w	-1.00162	-0.0263951
Q8IJN7_ENO_PLAF7	ENO	48.65	0	4	1	3		Q8IJN7_ENO_PLAF7	ENO	0.0687186	-0.784293
C6KSV0_C6KSV0_PLAF7	PFF0510w	15.44	1	6	0	4		C6KSV0_C6KSV0_PLAF7	PFF0510w	0.0844762	-0.279737
Q8IJZ3_Q8IJZ3_PLAF7	PF10_0047	106.23	1	0	0	0		Q8IJZ3_Q8IJZ3_PLAF7	PF10_0047	-1.00162	-0.0263951
Q76NN8_Q76NN8_PLAF7	PFA_0310c	139.33	1	2	0	0		Q76NN8_Q76NN8_PLAF7	PFA_0310c	-0.838103	0.0874183
Q8IIP9_Q8IIP9_PLAF7	GS27	34.05	1	1	0	0		Q8IIP9_Q8IIP9_PLAF7	GS27	-0.919864	0.030511605647987012
Q8IJR6_Q8IJR6_PLAF7	PF10_0126	43.49	1	2	0	0		Q8IJR6_Q8IJR6_PLAF7	PF10_0126	-0.838103	0.0874183
Q8IFP3_Q8IFP3_PLAF7	PFD1050w	49.66	1	0	0	0		Q8IFP3_Q8IFP3_PLAF7	PFD1050w	-1.00162	-0.0263951
Q8IE83_Q8IE83_PLAF7	PF13_0131	42.57	1	0	0	0		Q8IE83_Q8IE83_PLAF7	PF13_0131	-1.00162	-0.0263951
Q8IJ34_Q8IJ34_PLAF7	PF10_0366	33.7	1	4	0	5		Q8IJ34_Q8IJ34_PLAF7	PF10_0366	0.069839	-0.542246
Q8IL47_Q8IL47_PLAF7	PF14_0402	249.45	1	2	0	0		Q8IL47_Q8IL47_PLAF7	PF14_0402	-0.838103	0.0874183
Q8II24_Q8II24_PLAF7	PF11_0351	73.25	0	7	1	8		Q8II24_Q8II24_PLAF7	PF11_0351	1.0584213627389032	-1.35705
Q8I3U6_Q8I3U6_PLAF7	PFE0810c	16.07	1	0	0	0		Q8I3U6_Q8I3U6_PLAF7	PFE0810c	-1.00162	-0.0263951
Q8IBW8_Q8IBW8_PLAF7	VAR	256.38	0	0	1	0		Q8IBW8_Q8IBW8_PLAF7	VAR	-0.704976	-0.565834
Q8I5X5_Q8I5X5_PLAF7	PFL0350c	311.23	0	0	1	0		Q8I5X5_Q8I5X5_PLAF7	PFL0350c	-0.704976	-0.565834
Q7KWJ5_Q7KWJ5_PLAF7	HT1	56.38	1	0	0	0		Q7KWJ5_Q7KWJ5_PLAF7	HT1	-1.00162	-0.0263951
Q8IBG4_Q8IBG4_PLAF7	MAL7P1.160	19.89	0	0	1	0		Q8IBG4_Q8IBG4_PLAF7	MAL7P1.160	-0.704976	-0.565834
Q8IJI2_Q8IJI2_PLAF7	PF10_0215	74.8	1	0	0	0		Q8IJI2_Q8IJI2_PLAF7	PF10_0215	-1.00162	-0.0263951
Q8IEB3_Q8IEB3_PLAF7	PF13_0116	149.08	1	0	0	0		Q8IEB3_Q8IEB3_PLAF7	PF13_0116	-1.00162	-0.0263951
Q8IL32_Q8IL32_PLAF7	PF14_0417	106.93	1	0	0	0		Q8IL32_Q8IL32_PLAF7	PF14_0417	-1.00162	-0.0263951
O96160_YPF14_PLAF7	PFB0315w	207.71	0	0	1	0		O96160_YPF14_PLAF7	PFB0315w	-0.704976	-0.565834
C6KT74_C6KT74_PLAF7	PfTKL-5	279.61	0	0	1	0		C6KT74_C6KT74_PLAF7	PfTKL-5	-0.704976	-0.565834

## Sheet: Soluble
	reference	Gene Symbol	MWT(kDa)	Unique MCMCBP-BirA	Total MCMBP-BirA	Unique 3D7-BirA	Total 3D7-birA		reference	Gene Symbol	MWT(kDa)	Unique MCMCBP-BirA	Total MCMBP-BirA	Unique 3D7-BirA	Total 3D7		reference	Gene Symbol	MWT(kDa)	Unique MCMCBP-BirA	Total MCMBP-BirA	Unique 3D7	Total 3D7
	Q8IC05_Q8IC05_PLAF7	PF07_0029	86.11	46	111	31	33		Q8ILX3_Q8ILX3_PLAF7	PF14_0120	112.7	31	155	0	0		Q8I5T4_Q8I5T4_PLAF7	PFL0580w	85.8	49	74	0	0
	Q8IC16_Q8IC16_PLAF7	PF07_0023	94.18	47	89	0	0		Q8IC05_Q8IC05_PLAF7	PF07_0029	86.11	30	47	6	6		Q8IC16_Q8IC16_PLAF7	PF07_0023	94.18	48	75	0	0
	Q8ILX3_Q8ILX3_PLAF7	PF14_0120	112.7	45	305	0	0		Q8IB24_Q8IB24_PLAF7	PF08_0054	73.87	22	46	9	11		Q8ILX3_Q8ILX3_PLAF7	PF14_0120	112.7	47	283	0	0
	Q8I5T4_Q8I5T4_PLAF7	PFL0580w	85.8	44	153	0	0		Q8I2X4_Q8I2X4_PLAF7	PFI0875w	72.34	23	32	3	4		Q8IC05_Q8IC05_PLAF7	PF07_0029	86.11	44	118	13	14
	Q8IEE5_Q8IEE5_PLAF7	PF13_0095	115.14	39	109	0	0		Q8IEK1_Q8IEK1_PLAF7	MAL13P1.56	125.98	23	27	0	0		Q8IEE5_Q8IEE5_PLAF7	PF13_0095	115.14	44	60	0	0
	Q8IDF0_Q8IDF0_PLAF7	PF13_0291	105.61	28	49	0	0		Q8I0P6_Q8I0P6_PLAF7	PF13_0304	48.93	19	67	6	7		Q8IDF0_Q8IDF0_PLAF7	PF13_0291	105.61	33	47	0	0
	Q8ILR7_Q8ILR7_PLAF7	PF14_0177	111.43	27	29	0	0		P27362_PGK_PLAF7	PGK	45.4	19	33	5	5		Q8ILA4_Q8ILA4_PLAF7	PF14_0341	67.33	32	48	1	1
	Q8IB24_Q8IB24_PLAF7	PF08_0054	73.87	15	27	25	40		Q8IC16_Q8IC16_PLAF7	PF07_0023	94.18	19	24	0	0		Q8I3J5_Q8I3J5_PLAF7	PFE1345c	109.73	30	34	0	0
	Q8I0P6_Q8I0P6_PLAF7	PF13_0304	48.93	16	18	26	30		C6KTA4_C6KTA4_PLAF7	PFF1300w	55.63	16	22	5	6		Q8ILR7_Q8ILR7_PLAF7	PF14_0177	111.43	30	33	0	0
	Q8IJN7_ENO_PLAF7	ENO	48.65	8	8	25	30		Q8I0V4_Q8I0V4_PLAF7	PFL1070c	94.96	17	23	0	0		Q8I3A1_Q8I3A1_PLAF7	PFI0235w	56.2	22	28	0	0
	Q8IEK1_Q8IEK1_PLAF7	MAL13P1.56	125.98	0	0	23	23		Q8I5T4_Q8I5T4_PLAF7	PFL0580w	85.8	17	23	0	0		Q8IB24_Q8IB24_PLAF7	PF08_0054	73.87	21	28	13	14
	Q8ILA4_Q8ILA4_PLAF7	PF14_0341	67.33	21	43	3	3		Q8IKW5_Q8IKW5_PLAF7	PF14_0486	93.46	17	22	0	0		Q8I0P6_Q8I0P6_PLAF7	PF13_0304	48.93	19	24	13	15
	Q8I3J5_Q8I3J5_PLAF7	PFE1345c	109.73	21	22	0	0		Q8IKK7_Q8IKK7_PLAF7	GAPDH	36.61	16	43	5	5		C6KSX8_C6KSX8_PLAF7	PFF0660w	123.65	17	23	0	0
	Q8I2X4_Q8I2X4_PLAF7	PFI0875w	72.34	4	4	20	24		Q8I2Z8_Q8I2Z8_PLAF7	PFI0755c	159.35	16	19	0	0		Q7K6A4_Q7K6A4_PLAF7	PfSAMS	44.82	12	14	5	7
	P27362_PGK_PLAF7	PGK	45.4	5	5	20	21		Q8IJN7_ENO_PLAF7	ENO	48.65	15	29	5	7		Q8IJN7_ENO_PLAF7	ENO	48.65	10	12	8	8
	Q8IKW5_Q8IKW5_PLAF7	PF14_0486	93.46	3	3	20	20		Q8I3Y8_Q8I3Y8_PLAF7	PFE0585c	69.07	15	18	0	0		Q8IJN8_Q8IJN8_PLAF7	PF10_0154	40.36	12	13	0	0
	Q8IKK7_Q8IKK7_PLAF7	GAPDH	36.61	11	11	16	24		Q8I0U8_Q8I0U8_PLAF7	MSP1	195.6	15	18	0	0		Q7KQL9_ALF_PLAF7	PF14_0425	40.08	11	17	7	7
	C0H4Y6_C0H4Y6_PLAF7	PfPDI-8	55.48	2	2	17	18		Q8IEE5_Q8IEE5_PLAF7	PF13_0095	115.14	15	17	0	0		Q8IJC6_Q8IJC6_PLAF7	PF10_0272	44.19	10	14	5	10
	Q7KQL9_ALF_PLAF7	PF14_0425	40.08	8	11	16	21		Q8I3M5_Q8I3M5_PLAF7	PFE1195w	127.27	14	14	0	0		O97247_O97247_PLAF7	PFC0285c	59.03	11	14	0	0
	Q8I3A1_Q8I3A1_PLAF7	PFI0235w	56.2	15	19	0	0		Q7KQL9_ALF_PLAF7	PF14_0425	40.08	13	18	3	3		Q8IDQ9_Q8IDQ9_PLAF7	PfPMT	31.02	8	10	6	6
	Q8I2Z8_Q8I2Z8_PLAF7	PFI0755c	159.35	4	4	14	14		Q8ILA4_Q8ILA4_PLAF7	PF14_0341	67.33	13	16	0	0		Q8IKK7_Q8IKK7_PLAF7	GAPDH	36.61	9	11	4	5
	Q8I0V4_Q8I0V4_PLAF7	PFL1070c	94.96	3	3	14	14		C0H4Y6_C0H4Y6_PLAF7	PfPDI-8	55.48	12	17	0	0		Q8I431_Q8I431_PLAF7	PFE0350c	46.18	8	8	6	6
	Q8IDQ9_Q8IDQ9_PLAF7	PfPMT	31.02	7	7	12	14		C0H5I7_C0H5I7_PLAF7	MAL13P1.283	57.94	12	15	0	0		C6KTA4_C6KTA4_PLAF7	PFF1300w	55.63	7	8	4	5
	Q76NM3_Q76NM3_PLAF7	PfLDH	34.09	5	5	12	17		Q8IDF0_Q8IDF0_PLAF7	PF13_0291	105.61	12	14	0	0		Q7KQK6_Q7KQK6_PLAF7	Ran	24.86	6	6	5	6
	Q7K6A4_Q7K6A4_PLAF7	PfSAMS	44.82	7	7	11	12		Q8IKT5_Q8IKT5_PLAF7	PF14_0517	88.45	12	14	0	0		Q8IKE1_Q8IKE1_PLAF7	ACC1	394.63	3	3	7	7
	C6KTA4_C6KTA4_PLAF7	PFF1300w	55.63	5	5	12	12		Q8IDQ9_Q8IDQ9_PLAF7	PfPMT	31.02	11	20	3	5		SAV1_STRVL		18.85	7	303	7	339
	C6KSX8_C6KSX8_PLAF7	PFF0660w	123.65	12	13	0	0		Q76NM3_Q76NM3_PLAF7	PfLDH	34.09	10	22	4	6		Q8I3B0_Q8I3B0_PLAF7	PFI0190w	15.52	5	6	7	13
	Q6LFH8_OAT_PLAF7	OAT	46.03	6	6	11	11		Q8I3A1_Q8I3A1_PLAF7	PFI0235w	56.2	10	13	0	0		Q8IIU8_Q8IIU8_PLAF7	PF11_0065	29.75	6	6	7	7
	Q8I3M5_Q8I3M5_PLAF7	PFE1195w	127.27	0	0	11	11		C6KT34_C6KT34_PLAF7	PFF0940c	92.33	10	11	0	0		C6KT23_C6KT23_PLAF7	PFF0885w	16.71	5	5	7	8
	Q8II24_Q8II24_PLAF7	PF11_0351	73.25	0	0	9	9		Q8IDM3_Q8IDM3_PLAF7	MAL13P1.237	42.13	9	13	1	1		O77381_O77381_PLAF7	PFC0775w	18.75	6	6	5	6
	Q8I0U8_Q8I0U8_PLAF7	MSP1	195.6	0	0	9	9		Q8I395_Q8I395_PLAF7	PFI0265c	104.79	9	12	0	0		Q6LFH8_OAT_PLAF7	OAT	46.03	5	5	6	6
	Q8I3Y8_Q8I3Y8_PLAF7	PFE0585c	69.07	0	0	9	9		Q8IC01_Q8IC01_PLAF7	PF07_0033	99.9	9	12	0	0		P27362_PGK_PLAF7	PGK	45.4	5	5	5	6
	Q8II61_Q8II61_PLAF7	PF11_0313	34.95	0	0	9	9		Q7KQK6_Q7KQK6_PLAF7	Ran	24.86	9	10	1	1		Q8I2X4_Q8I2X4_PLAF7	PFI0875w	72.34	5	5	4	5
	SAV1_STRVL		18.85	8	203	8	202		C6KT76_C6KT76_PLAF7	PFF1155w	55.23	9	10	0	0		Q8IKW5_Q8IKW5_PLAF7	PF14_0486	93.46	7	7	3	3
	Q8IJX8_Q8IJX8_PLAF7	PF10_0063	11.97	2	2	8	11		C0H571_C0H571_PLAF7	RhopH2	162.56	9	9	0	0		Q8I0V4_Q8I0V4_PLAF7	PFL1070c	94.96	7	8	1	1
	O97247_O97247_PLAF7	PFC0285c	59.03	7	7	5	5		Q7KQL5_TBB_PLAF7	PF10_0084	49.72	8	12	1	2		Q76NM3_Q76NM3_PLAF7	PfLDH	34.09	5	7	6	10
	C0H4V6_C0H4V6_PLAF7	MAL8P1.69	30.17	2	2	8	9		Q8IIG6_Q8IIG6_PLAF7	PF11_0208	28.75	8	12	1	1		Q8IFP2_Q8IFP2_PLAF7	PFD1055w	19.71	6	7	4	5
	Q8IIU8_Q8IIU8_PLAF7	PF11_0065	29.75	4	4	7	7		Q6LFH8_OAT_PLAF7	OAT	46.03	8	11	1	1		Q8IAX5_Q8IAX5_PLAF7	PF08_0076	16.28	4	4	5	6
	P50250_SAHH_PLAF7	PFE1050w	53.8	2	2	8	8		Q8I431_Q8I431_PLAF7	PFE0350c	46.18	7	8	4	4		Q8I2Z8_Q8I2Z8_PLAF7	PFI0755c	159.35	6	8	0	0
	Q8IIV8_Q8IIV8_PLAF7	PF11_0055	49.23	2	2	8	8		Q7K6A4_Q7K6A4_PLAF7	PfSAMS	44.82	8	9	1	1		Q7KQL5_TBB_PLAF7	PF10_0084	49.72	5	5	2	2
	Q8IKE1_Q8IKE1_PLAF7	ACC1	394.63	2	3	7	7		Q8IDJ8_Q8IDJ8_PLAF7	PF13_0262	67.55	8	10	0	0		C0H4N1_C0H4N1_PLAF7	MAL7P1.83	108.86	6	7	0	0
	Q8IIG6_Q8IIG6_PLAF7	PF11_0208	28.75	1	1	7	8		Q8II24_Q8II24_PLAF7	PF11_0351	73.25	8	8	1	1		Q8IM09_Q8IM09_PLAF7	PF14_0084	851.35	6	7	0	0
	Q8IJS7_Q8IJS7_PLAF7	PF10_0115	131.55	0	0	8	8		O97247_O97247_PLAF7	PFC0285c	59.03	8	9	0	0		Q8IBY8_Q8IBY8_PLAF7	PF07_0042	350.48	6	6	0	0
	Q8I431_Q8I431_PLAF7	PFE0350c	46.18	4	5	6	10		Q8ILC1_STI1L_PLAF7	PF14_0324	66.02	8	9	0	0		Q8IM10_Q8IM10_PLAF7	PF14_0083	25.04	3	4	5	7
	Q7KQK6_Q7KQK6_PLAF7	Ran	24.86	4	4	7	7		Q8I501_Q8I501_PLAF7	PFL2060c	52.31	8	8	0	0		Q8IKF0_Q8IKF0_PLAF7	H45	45.28	4	6	2	2
	Q8IBA0_Q8IBA0_PLAF7	PfRACK	35.66	4	4	7	7		Q8IBM9_Q8IBM9_PLAF7	MAL7P1.122	45.14	8	8	0	0		O77395_O77395_PLAF7	PFC0735w	14.86	2	2	5	5
	Q8IDV0_Q8IDV0_PLAF7	PF13_0214	47.75	0	0	7	9		Q8IDZ9_Q8IDZ9_PLAF7	PF13_0179	151.21	8	8	0	0		C0H4Y6_C0H4Y6_PLAF7	PfPDI-8	55.48	5	5	2	2
	Q7KQL5_TBB_PLAF7	PF10_0084	49.72	1	1	7	7		Q8IJX8_Q8IJX8_PLAF7	PF10_0063	11.97	7	10	2	2		O96248_O96248_PLAF7	PFB0775w	64.53	5	6	0	0
	Q8IL11_Q8IL11_PLAF7	LAP	67.78	0	0	7	7		C6KT50_C6KT50_PLAF7	PFF1025c	32.99	7	10	0	0		O77344_O77344_PLAF7	PfGSK-3	51.58	5	6	0	0
	Q8IDZ9_Q8IDZ9_PLAF7	PF13_0179	151.21	0	0	7	7		Q8IIA4_Q8IIA4_PLAF7	PF11_0270	119.47	7	10	0	0		Q8IIA2_Q8IIA2_PLAF7	PF11_0272	17.88	3	3	3	3
	Q8IJS1_Q8IJS1_PLAF7	PF10_0121	26.35	0	0	7	7		C0H551_C0H551_PLAF7	PFI1110w	63.19	7	9	0	0		Q8I3V8_Q8I3V8_PLAF7	PFE0750c	98.32	5	5	0	0
	Q8I4X0_ACT1_PLAF7	PFL2215w	41.84	1	1	6	6		Q7KQL3_ARF1_PLAF7	ARF1	20.9	7	9	0	0		Q8IHY0_Q8IHY0_PLAF7	PF11_0396	105.34	5	5	0	0
	Q8IKT5_Q8IKT5_PLAF7	PF14_0517	88.45	0	0	7	7		Q8IDV0_Q8IDV0_PLAF7	PF13_0214	47.75	7	8	0	0		Q8IJS7_Q8IJS7_PLAF7	PF10_0115	131.55	5	5	0	0
	Q8IFP2_Q8IFP2_PLAF7	PFD1055w	19.71	5	6	6	7		Q76NM6_VATA_PLAF7	vapA	68.53	7	8	0	0		Q7KQM1_PRI1_PLAF7	PF14_0366	53.46	5	5	0	0
	Q8I6V3_Q8I6V3_PLAF7	PF14_0077	51.45	2	2	6	6		Q8IJN8_Q8IJN8_PLAF7	PF10_0154	40.36	7	7	0	0		Q76NN6_Q76NN6_PLAF7	PFD0950w	33.18	5	5	0	0
	Q8ILI6_AN32_PLAF7	PF14_0257	32.99	2	2	5	5		O77312_O77312_PLAF7	PFC0135c	147.84	7	7	0	0		O96258_O96258_PLAF7	PFB0830w	12.5	3	15	4	17
	C6KT34_C6KT34_PLAF7	PFF0940c	92.33	1	1	6	6		Q8IAR3_Q8IAR3_PLAF7	MAL8P1.128	29.48	7	7	0	0		Q8IDR9_Q8IDR9_PLAF7	PF13_0228	35.36	4	6	4	9
	Q8IDM3_Q8IDM3_PLAF7	MAL13P1.237	42.13	0	0	6	7		Q8I4X0_ACT1_PLAF7	PFL2215w	41.84	6	32	0	0		Q8IEM3_Q8IEM3_PLAF7	PF13_0049	19.23	4	5	4	6
	Q8I5C4_Q8I5C4_PLAF7	PFL1425w	60.62	0	0	6	6		Q8IBA0_Q8IBA0_PLAF7	PfRACK	35.66	6	11	2	2		C0H4L5_C0H4L5_PLAF7	MAL7P1.320	10.53	2	4	4	6
	Q8IIX0_Q8IIX0_PLAF7	PF11_0043	13.01	0	0	6	6		C0H4V6_C0H4V6_PLAF7	MAL8P1.69	30.17	6	12	0	0		C6KSY6_C6KSY6_PLAF7	PFF0700c	21.57	3	4	4	5
	Q8IM15_Q8IM15_PLAF7	PF14_0078	51.66	0	0	6	6		Q8I6V3_Q8I6V3_PLAF7	PF14_0077	51.45	6	9	0	0		C0H4V6_C0H4V6_PLAF7	MAL8P1.69	30.17	4	5	3	3
	Q8IC01_Q8IC01_PLAF7	PF07_0033	99.9	0	0	6	6		C6KSX8_C6KSX8_PLAF7	PFF0660w	123.65	6	9	0	0		Q8IBQ5_Q8IBQ5_PLAF7	PF07_0080	16.47	4	5	3	3
	C6KST5_C6KST5_PLAF7	PFF0430w	61.49	0	0	6	6		Q8IBI3_Q8IBI3_PLAF7	PF07_0112	28.37	6	9	0	0		Q8IBA0_Q8IBA0_PLAF7	PfRACK	35.66	4	4	2	3
	P61074_PCNA_PLAF7	PCNA	30.57	0	0	6	6		Q8IJS1_Q8IJS1_PLAF7	PF10_0121	26.35	6	9	0	0		Q76NN7_Q76NN7_PLAF7	PfCyP19	18.94	4	7	0	0
	Q8IDJ8_Q8IDJ8_PLAF7	PF13_0262	67.55	0	0	6	6		Q8I5H4_Q8I5H4_PLAF7	PFL1170w	97.17	6	8	0	0		Q8I3R0_Q8I3R0_PLAF7	PFE1005w	22.11	4	4	3	3
	Q8IL88_Q8IL88_PLAF7	PF14_0359	48.44	4	4	5	6		Q7KQM4_PLM1_PLAF7	PF14_0076	51.43	6	8	0	0		Q8I3R6_Q8I3R6_PLAF7	PFE0975c	15.38	3	3	3	4
	Q76NN7_Q76NN7_PLAF7	PfCyP19	18.94	1	1	5	6		Q8IAM0_Q8IAM0_PLAF7	PF08_0132	160.32	6	8	0	0		Q8IDB0_Q8IDB0_PLAF7	PF13_0316	17.24	3	4	3	3
	Q8I3T5_Q8I3T5_PLAF7	PFE0865c	34.54	3	3	4	4		Q7KQM0_TPIS_PLAF7	TPI	27.92	6	8	0	0		Q8ILL3_Q8ILL3_PLAF7	PF14_0230	33.98	4	4	3	3
	Q8IAX8_Q8IAX8_PLAF7	PF08_0074	27.24	1	1	5	6		Q8IM15_Q8IM15_PLAF7	PF14_0078	51.66	6	7	0	0		Q8IAX6_Q8IAX6_PLAF7	PF08_0075	25.43	4	4	3	3
	Q8IDB0_Q8IDB0_PLAF7	PF13_0316	17.24	2	2	5	5		Q8IM16_Q8IM16_PLAF7	PF14_0075	51.01	6	7	0	0		Q8IJA9_Q8IJA9_PLAF7	PF10_0289	42.44	4	4	2	2
	Q8IBM9_Q8IBM9_PLAF7	MAL7P1.122	45.14	1	1	5	5		Q8ILR7_Q8ILR7_PLAF7	PF14_0177	111.43	6	7	0	0		C0H5I7_C0H5I7_PLAF7	MAL13P1.283	57.94	4	6	0	0
	O97250_O97250_PLAF7	PFC0300c	30.5	1	1	5	5		Q8IL11_Q8IL11_PLAF7	LAP	67.78	6	7	0	0		Q8II27_Q8II27_PLAF7	PF11_0348	101.5	3	3	3	3
	Q8IDS6_Q8IDS6_PLAF7	PF13_0224	21.73	0	0	5	6		Q8IJS7_Q8IJS7_PLAF7	PF10_0115	131.55	6	7	0	0		P50250_SAHH_PLAF7	PFE1050w	53.8	4	4	1	1
	Q8IBI3_Q8IBI3_PLAF7	PF07_0112	28.37	0	0	5	6		Q8IJR9_Q8IJR9_PLAF7	PF10_0123	63.89	6	7	0	0		Q8I468_Q8I468_PLAF7	PFE0160c	37.68	2	2	3	3
	Q8IM16_Q8IM16_PLAF7	PF14_0075	51.01	0	0	5	5		Q8IIV8_Q8IIV8_PLAF7	PF11_0055	49.23	6	7	0	0		Q8I447_Q8I447_PLAF7	PFE0270c	156.34	4	5	0	0
	Q8ILC1_STI1L_PLAF7	PF14_0324	66.02	0	0	5	5		Q8IAX8_Q8IAX8_PLAF7	PF08_0074	27.24	6	7	0	0		Q8I502_Q8I502_PLAF7	PFL2055w	16.06	1	1	4	4
	Q8IKT2_Q8IKT2_PLAF7	PF14_0520	52.96	0	0	5	5		C0H5H0_C0H5H0_PLAF7	MAL13P1.540	108.12	6	6	0	0		Q8IAX8_Q8IAX8_PLAF7	PF08_0074	27.24	3	3	2	2
	Q8ILP4_Q8ILP4_PLAF7	PF14_0200	59.88	5	5	0	0		O97282_O97282_PLAF7	PFC0900w	59.14	6	6	0	0		Q8IIG6_Q8IIG6_PLAF7	PF11_0208	28.75	4	4	1	1
	Q8IJA9_Q8IJA9_PLAF7	PF10_0289	42.44	0	0	5	5		Q8IFP2_Q8IFP2_PLAF7	PFD1055w	19.71	5	8	2	3		Q8ILP4_Q8ILP4_PLAF7	PF14_0200	59.88	4	4	0	0
	Q7K6A9_Q7K6A9_PLAF7	MAL8P1.142	30.85	0	0	5	5		Q8IIU8_Q8IIU8_PLAF7	PF11_0065	29.75	5	5	4	4		C6KT76_C6KT76_PLAF7	PFF1155w	55.23	4	4	0	0
	C6KT50_C6KT50_PLAF7	PFF1025c	32.99	0	0	5	5		Q8II61_Q8II61_PLAF7	PF11_0313	34.95	5	8	0	0		Q8IJ60_Q8IJ60_PLAF7	PF10_0340	104.1	4	4	0	0
	Q8I320_Q8I320_PLAF7	PfEF-1beta	32.01	0	0	5	5		Q76NN7_Q76NN7_PLAF7	PfCyP19	18.94	5	8	0	0		Q8IJD4_RSSA_PLAF7	PF10_0264	29.84	4	4	0	0
	Q7KQM0_TPIS_PLAF7	TPI	27.92	0	0	5	5		Q8IK90_Q8IK90_PLAF7	PF14_0716	28.82	5	7	0	0		Q8IAU3_Q8IAU3_PLAF7	DHPS	83.32	4	4	0	0
	Q8I5H4_Q8I5H4_PLAF7	PFL1170w	97.17	0	0	5	5		P50250_SAHH_PLAF7	PFE1050w	53.8	5	7	0	0		Q8IL88_Q8IL88_PLAF7	PF14_0359	48.44	4	4	0	0
	O96198_O96198_PLAF7	PFB0525w	70.45	0	0	5	5		Q9TY94_Q9TY94_PLAF7	UAP56	52.19	5	7	0	0		Q8I4T1_VPS26_PLAF7	PFL2415w	34.49	4	4	0	0
	Q8IL13_Q8IL13_PLAF7	PF14_0437	60	0	0	5	5		Q8IBT2_Q8IBT2_PLAF7	MAL7P1.81	37.26	5	7	0	0		C6KT82_C6KT82_PLAF7	PFF1185w	315.42	4	4	0	0
	Q8IM10_Q8IM10_PLAF7	PF14_0083	25.04	3	3	4	5		Q8IIA2_Q8IIA2_PLAF7	PF11_0272	17.88	5	6	1	1		Q8IDV0_Q8IDV0_PLAF7	PF13_0214	47.75	4	4	0	0
	Q8IJN8_Q8IJN8_PLAF7	PF10_0154	40.36	3	3	4	4		Q8IJA9_Q8IJA9_PLAF7	PF10_0289	42.44	5	6	0	0		O97231_RL44_PLAF7	RPL44	12.15	2	2	2	9
	O77395_O77395_PLAF7	PFC0735w	14.86	3	3	4	4		C6KST5_C6KST5_PLAF7	PFF0430w	61.49	5	6	0	0		Q8ILV2_Q8ILV2_PLAF7	PF14_0141	25.2	3	6	3	4
	C0H5I7_C0H5I7_PLAF7	MAL13P1.283	57.94	4	4	3	3		Q7KQK0_Q7KQK0_PLAF7	PKAr	50.8	5	6	0	0		Q8I467_CADF1_PLAF7	PFE0165w	13.73	3	3	3	5
	Q76NN6_Q76NN6_PLAF7	PFD0950w	33.18	3	3	4	4		Q8IAX5_Q8IAX5_PLAF7	PF08_0076	16.28	5	6	0	0		O97313_RS3A_PLAF7	MAL3P7.35	30.03	3	3	3	4
	Q8IAX5_Q8IAX5_PLAF7	PF08_0076	16.28	4	4	3	3		Q8IM38_Q8IM38_PLAF7	PF14_0053	40.57	5	6	0	0		O77364_O77364_PLAF7	PFC0535w	14.8	0	0	3	5
	Q8I3R6_Q8I3R6_PLAF7	PFE0975c	15.38	3	3	4	4		O77323_TCPH_PLAF7	MAL3P3.6	59.54	5	6	0	0		Q8I3T5_Q8I3T5_PLAF7	PFE0865c	34.54	3	3	2	2
	Q8IKF0_Q8IKF0_PLAF7	H45	45.28	2	2	4	4		Q8I3J5_Q8I3J5_PLAF7	PFE1345c	109.73	5	6	0	0		Q8IET7_Q8IET7_PLAF7	PF13_0014	22.47	3	3	2	2
	Q8IDV1_Q8IDV1_PLAF7	PF13_0213	25.52	2	2	4	4		C6KSV3_C6KSV3_PLAF7	PfTK	75.77	5	6	0	0		Q8IKH8_Q8IKH8_PLAF7	PF14_0627	24.65	2	2	2	2
	Q8ILE8_Q8ILE8_PLAF7	PF14_0296	19.28	1	1	4	5		O77396_O77396_PLAF7	PFC0745c	29.27	5	6	0	0		Q8IKQ7_Q8IKQ7_PLAF7	PF14_0546	75.94	3	4	0	0
	Q8ILL3_Q8ILL3_PLAF7	PF14_0230	33.98	2	2	4	4		Q8IJ60_Q8IJ60_PLAF7	PF10_0340	104.1	5	6	0	0		Q8I5E0_Q8I5E0_PLAF7	PFL1345c	129.12	3	4	0	0
	Q8I3R0_Q8I3R0_PLAF7	PFE1005w	22.11	2	2	4	4		Q8ILL3_Q8ILL3_PLAF7	PF14_0230	33.98	5	6	0	0		Q8IB66_Q8IB66_PLAF7	MAL8P1.40	32.42	3	3	1	1
	Q8I5R7_SYP_PLAF7	proRS	86.59	2	2	4	4		Q8ID43_Q8ID43_PLAF7	PF13_0349	17	5	6	0	0		Q8I6U8_GBP_PLAF7	GBP	95.79	3	4	0	0
	Q76NM6_VATA_PLAF7	vapA	68.53	1	1	4	4		Q8ILI2_Q8ILI2_PLAF7	PF14_0261	42.61	5	6	0	0		Q8IJZ7_Q8IJZ7_PLAF7	PF10_0043	23.74	0	0	3	4
	Q8II60_Q8II60_PLAF7	PF11_0314	49.51	1	1	4	4		Q8IJP3_Q8IJP3_PLAF7	PF10_0149	79.46	5	6	0	0		C0H4H3_C0H4H3_PLAF7	PFF0573c	6.51	3	4	0	0
	C6KT76_C6KT76_PLAF7	PFF1155w	55.23	1	1	4	4		Q8I566_Q8I566_PLAF7	PFL1720w	49.75	5	6	0	0		Q8I426_Q8I426_PLAF7	PFE0380c	62.54	3	3	0	0
	Q8IJ60_Q8IJ60_PLAF7	PF10_0340	104.1	1	1	4	4		Q8IKT2_Q8IKT2_PLAF7	PF14_0520	52.96	5	5	0	0		Q8IJS1_Q8IJS1_PLAF7	PF10_0121	26.35	3	3	0	0
	Q8IAR3_Q8IAR3_PLAF7	MAL8P1.128	29.48	1	1	4	4		Q7K6A9_Q7K6A9_PLAF7	MAL8P1.142	30.85	5	5	0	0		Q8I2X7_Q8I2X7_PLAF7	PFI0860c	94.09	3	3	0	0
	Q8I3T8_Q8I3T8_PLAF7	PFE0850c	18.1	1	1	4	4		Q8I3L4_Q8I3L4_PLAF7	PfACS10	76.8	5	5	0	0		Q8ID85_Q8ID85_PLAF7	PF13_0330	54.6	3	3	0	0
	Q8IL02_Q8IL02_PLAF7	PF14_0448	29.94	1	1	4	4		Q8I2J4_PROF_PLAF7	Pfn	19.01	5	5	0	0		Q8IL02_Q8IL02_PLAF7	PF14_0448	29.94	3	3	0	0
	Q8IJZ7_Q8IJZ7_PLAF7	PF10_0043	23.74	2	2	3	3		C0H4U4_C0H4U4_PLAF7	MAL8P1.95	36.23	5	5	0	0		O97291_O97291_PLAF7	PFC0960c	231.65	0	0	3	3
	C0H5H0_C0H5H0_PLAF7	MAL13P1.540	108.12	0	0	4	4		Q8IL88_Q8IL88_PLAF7	PF14_0359	48.44	5	5	0	0		SAV_STRAV		18.82	2	238	2	227
	O96248_O96248_PLAF7	PFB0775w	64.53	4	4	0	0		Q76NN6_Q76NN6_PLAF7	PFD0950w	33.18	5	5	0	0		C0H4K8_C0H4K8_PLAF7	MAL7P1.300	6.41	2	4	2	5
	C6KTB1_C6KTB1_PLAF7	PFF1335c	20.28	0	0	4	4		Q8IL48_Q8IL48_PLAF7	PF14_0401	46.41	5	5	0	0		Q8ILN8_Q8ILN8_PLAF7	PF14_0205	11.66	2	2	2	4
	Q8IIR7_Q8IIR7_PLAF7	ERC	39.35	0	0	4	4		SAV1_STRVL		18.85	4	182	3	74		Q8IB51_Q8IB51_PLAF7	PF08_0039	16.37	2	3	2	2
	Q7KQM1_PRI1_PLAF7	PF14_0366	53.46	4	4	0	0		Q8IJC6_Q8IJC6_PLAF7	PF10_0272	44.19	3	5	2	4		Q8I3T9_Q8I3T9_PLAF7	PFE0845c	27.98	2	2	2	3
	Q8IIJ9_CATC_PLAF7	PF11_0174	80.36	0	0	4	4		Q8IM10_Q8IM10_PLAF7	PF14_0083	25.04	4	4	3	4		Q8IDI5_Q8IDI5_PLAF7	PF13_0268	23.4	2	2	2	2
	Q8I608_Q8I608_PLAF7	PFL0185c	40.46	0	0	4	4		O97250_O97250_PLAF7	PFC0300c	30.5	4	7	1	1		Q8I3U6_Q8I3U6_PLAF7	PFE0810c	16.07	2	3	1	1
	Q8I4T1_VPS26_PLAF7	PFL2415w	34.49	4	4	0	0		C6KST3_C6KST3_PLAF7	PFF0420c	26.51	4	7	0	0		Q8IJX8_Q8IJX8_PLAF7	PF10_0063	11.97	2	2	1	2
	Q8IIR9_Q8IIR9_PLAF7	CK2alpha	39.86	0	0	4	4		Q8I5S6_Q8I5S6_PLAF7	PFL0625c	165.96	4	7	0	0		C6S3J6_C6S3J6_PLAF7	PF14_0575a	8.01	0	0	2	4
	Q8IDG2_Q8IDG2_PLAF7	MAL13P1.270	27.21	0	0	4	4		Q8IEN3_Q8IEN3_PLAF7	cpsSII	273.27	4	7	0	0		Q8I503_Q8I503_PLAF7	PFL2050w	63.81	2	3	0	0
	Q8ID85_Q8ID85_PLAF7	PF13_0330	54.6	4	4	0	0		C6KT23_C6KT23_PLAF7	PFF0885w	16.71	4	5	2	2		Q8IE09_Q8IE09_PLAF7	PF13_0171	14.98	2	2	1	1
	Q9TY95_SERA_PLAF7	SERA	111.7	0	0	4	4		C0H4A6_C0H4A6_PLAF7	PFD0770c	24.12	4	5	1	1		Q8I5T2_Q8I5T2_PLAF7	PFL0595c	23.94	2	3	0	0
	Q8I2J4_PROF_PLAF7	Pfn	19.01	0	0	4	4		Q8IKF0_Q8IKF0_PLAF7	H45	45.28	4	6	0	0		Q8ID50_Q8ID50_PLAF7	PF13_0346	14.61	2	2	1	1
	Q8I2W3_Q8I2W3_PLAF7	PFI0930c	31.81	0	0	4	4		Q8IDV2_Q8IDV2_PLAF7	MAL13P1.190	59.03	4	6	0	0		Q8I501_Q8I501_PLAF7	PFL2060c	52.31	2	3	0	0
	Q8IKU1_Q8IKU1_PLAF7	SBA1	30.47	0	0	4	4		C6KT55_C6KT55_PLAF7	PFF1050w	20.61	4	6	0	0		C6KSV0_C6KSV0_PLAF7	PFF0510w	15.44	0	0	2	3
	Q8IL80_Q8IL80_PLAF7	TPx1	21.79	0	0	4	4		Q8ID50_Q8ID50_PLAF7	PF13_0346	14.61	4	5	1	1		Q8I5Y9_Q8I5Y9_PLAF7	PFL0280c	38.99	2	2	0	0
	Q7KQM4_PLM1_PLAF7	PF14_0076	51.43	0	0	4	4		Q7KQL8_THIO_PLAF7	PF14_0545	11.71	4	6	0	0		O00806_RLA2_PLAF7	MAL3P3.19	11.94	0	0	2	2
	Q8IIK8_Q8IIK8_PLAF7	CyP22	21.72	0	0	4	4		Q8IKH8_Q8IKH8_PLAF7	PF14_0627	24.65	4	5	1	1		Q8I5M9_Q8I5M9_PLAF7	PFL0865w	56.05	2	2	0	0
	SAV_STRAV		18.82	2	177	3	133		Q8ILE8_Q8ILE8_PLAF7	PF14_0296	19.28	4	5	1	1		Q8I2P8_Q8I2P8_PLAF7	PFI1280c	366.73	2	2	0	0
	Q8I3B0_Q8I3B0_PLAF7	PFI0190w	15.52	2	5	2	2		Q8IDG2_Q8IDG2_PLAF7	MAL13P1.270	27.21	4	5	0	0		Q8I2W4_Q8I2W4_PLAF7	PFI0925w	124.38	2	2	0	0
	Q8IET7_Q8IET7_PLAF7	PF13_0014	22.47	3	3	3	4		Q8II60_Q8II60_PLAF7	PF11_0314	49.51	4	5	0	0		Q8I425_Q8I425_PLAF7	PFE0385w	177.32	2	2	0	0
	Q8I3U6_Q8I3U6_PLAF7	PFE0810c	16.07	2	2	3	4		Q8I5F9_Q8I5F9_PLAF7	PFL1245w	131.69	4	5	0	0		Q8II61_Q8II61_PLAF7	PF11_0313	34.95	2	2	0	0
	Q8IJC6_Q8IJC6_PLAF7	PF10_0272	44.19	1	3	3	3		O97249_RS12_PLAF7	RPS12	15.39	4	5	0	0		Q8IAW0_Q8IAW0_PLAF7	PF08_0087	61.12	2	2	0	0
	Q8IBQ5_Q8IBQ5_PLAF7	PF07_0080	16.47	2	3	3	3		Q8IDS6_Q8IDS6_PLAF7	PF13_0224	21.73	4	5	0	0		C0H4A6_C0H4A6_PLAF7	PFD0770c	24.12	2	2	0	0
	Q8I468_Q8I468_PLAF7	PFE0160c	37.68	3	3	3	3		Q8IDN4_Q8IDN4_PLAF7	MAL13P1.233	24.97	4	5	0	0		C6KTB3_C6KTB3_PLAF7	PFF1345w	132.75	2	2	0	0
	Q8IEM3_Q8IEM3_PLAF7	PF13_0049	19.23	3	3	3	3		C6KTB1_C6KTB1_PLAF7	PFF1335c	20.28	4	5	0	0		Q8IEU2_Q8IEU2_PLAF7	pfg27-25	25.99	2	2	0	0
	C6KT55_C6KT55_PLAF7	PFF1050w	20.61	2	2	3	3		Q8IIJ9_CATC_PLAF7	PF11_0174	80.36	4	5	0	0		Q8I0W8_Q8I0W8_PLAF7	PFE0675c	129.12	2	2	0	0
	Q8IIA2_Q8IIA2_PLAF7	PF11_0272	17.88	2	2	3	3		Q8I3R0_Q8I3R0_PLAF7	PFE1005w	22.11	4	5	0	0		Q8ID96_Q8ID96_PLAF7	PF13_0323	85.5	2	2	0	0
	Q8ID50_Q8ID50_PLAF7	PF13_0346	14.61	2	2	3	3		Q8I1S0_Q8I1S0_PLAF7	sar1	22.01	4	5	0	0		Q8ILK3_Q8ILK3_PLAF7	PF14_0240	18.78	0	0	2	2
	Q8II27_Q8II27_PLAF7	PF11_0348	101.5	2	2	3	3		Q8I608_Q8I608_PLAF7	PFL0185c	40.46	4	5	0	0		Q8I630_Q8I630_PLAF7	PFL0075w	57.61	2	2	0	0
	C0H4U4_C0H4U4_PLAF7	MAL8P1.95	36.23	0	0	3	5		Q8ILY9_Q8ILY9_PLAF7	PF14_0104	51.21	4	5	0	0		C6KT34_C6KT34_PLAF7	PFF0940c	92.33	2	2	0	0
	Q8IDR9_Q8IDR9_PLAF7	PF13_0228	35.36	3	3	2	2		Q8I3T8_Q8I3T8_PLAF7	PFE0850c	18.1	4	5	0	0		O96220_O96220_PLAF7	PFB0635w	60.92	2	2	0	0
	Q8IB66_Q8IB66_PLAF7	MAL8P1.40	32.42	1	1	3	3		Q8IC35_Q8IC35_PLAF7	MAL7P1.12	263.01	4	5	0	0		Q8ILR0_Q8ILR0_PLAF7	PF14_0184	136.86	2	2	0	0
	Q7KQL8_THIO_PLAF7	PF14_0545	11.71	0	0	3	4		Q8IBS3_Q8IBS3_PLAF7	PF07_0073	62.41	4	5	0	0		Q8ILI6_AN32_PLAF7	PF14_0257	32.99	2	2	0	0
	Q8I1S0_Q8I1S0_PLAF7	sar1	22.01	1	1	3	3		O96198_O96198_PLAF7	PFB0525w	70.45	4	5	0	0		Q8I5U6_Q8I5U6_PLAF7	PFL0515w	24.53	2	2	0	0
	Q8IM09_Q8IM09_PLAF7	PF14_0084	851.35	3	4	0	0		C0H4L1_C0H4L1_PLAF7	MAL7P1.202	145.42	4	5	0	0		Q8I5F3_Q8I5F3_PLAF7	PFL1275c	101.93	2	2	0	0
	Q8I2P8_Q8I2P8_PLAF7	PFI1280c	366.73	3	4	0	0		Q8IET7_Q8IET7_PLAF7	PF13_0014	22.47	4	5	0	0		Q8IM38_Q8IM38_PLAF7	PF14_0053	40.57	2	2	0	0
	Q8I502_Q8I502_PLAF7	PFL2055w	16.06	1	1	3	3		Q6ZMA8_Q6ZMA8_PLAF7	PFD0305c	55.75	4	4	0	0		Q8I5H4_Q8I5H4_PLAF7	PFL1170w	97.17	2	2	0	0
	Q8IIV1_Q8IIV1_PLAF7	PF11_0062	13.12	2	2	2	2		Q8IKH3_Q8IKH3_PLAF7	PF14_0632	132.68	4	4	0	0		C0H5J5_C0H5J5_PLAF7	MAL13P1.303	47.8	2	2	0	0
	C6KSY0_C6KSY0_PLAF7	ApiAP2	485.28	0	0	3	4		Q76NL8_Q76NL8_PLAF7	flN	138.78	4	4	0	0		C0H4L1_C0H4L1_PLAF7	MAL7P1.202	145.42	2	2	0	0
	Q8IIM8_Q8IIM8_PLAF7	PF11_0142	42.68	0	0	3	3		Q8II82_Q8II82_PLAF7	PF11_0292	29.12	4	4	0	0		Q8IL58_Q8IL58_PLAF7	PF14_0391	24.79	0	0	2	2
	Q8IDN4_Q8IDN4_PLAF7	MAL13P1.233	24.97	0	0	3	3		Q8IJD4_RSSA_PLAF7	PF10_0264	29.84	4	4	0	0		Q8I574_Q8I574_PLAF7	PFL1680w	151.72	2	2	0	0
	Q8IFP3_Q8IFP3_PLAF7	PFD1050w	49.66	0	0	3	3		Q8I4R5_Q8I4R5_PLAF7	PFL2505c	262.99	4	4	0	0		Q8IHZ9_KC1_PLAF7	CK1	37.61	2	2	0	0
	Q6ZMA8_Q6ZMA8_PLAF7	PFD0305c	55.75	0	0	3	3		Q8ILI6_AN32_PLAF7	PF14_0257	32.99	4	4	0	0		Q8IL13_Q8IL13_PLAF7	PF14_0437	60	2	2	0	0
	O97249_RS12_PLAF7	RPS12	15.39	0	0	3	3		Q8IAW0_Q8IAW0_PLAF7	PF08_0087	61.12	4	4	0	0		Q8IL11_Q8IL11_PLAF7	LAP	67.78	2	2	0	0
	C0H4A6_C0H4A6_PLAF7	PFD0770c	24.12	0	0	3	3		Q8I2R8_Q8I2R8_PLAF7	PFI1175c	22.96	4	4	0	0		Q8II62_Q8II62_PLAF7	PF11_0312	10.31	0	0	2	2
	Q8IM45_Q8IM45_PLAF7	PF14_0046	34.7	0	0	3	3		O96212_O96212_PLAF7	PFB0595w	37.33	4	4	0	0		Q8IIB4_Q8IIB4_PLAF7	PF11_0260	14.74	0	0	2	2
	Q8IJV6_Q8IJV6_PLAF7	PF10_0086	27.59	0	0	3	3		P61074_PCNA_PLAF7	PCNA	30.57	4	4	0	0		Q8IIV2_Q8IIV2_PLAF7	PF11_0061	11.45	0	0	2	2
	Q8I5F4_Q8I5F4_PLAF7	PFL1270w	33.25	0	0	3	3		Q8IHR4_Q8IHR4_PLAF7	dyn1	96.31	4	4	0	0		C6KST7_C6KST7_PLAF7	PFF0445w	720.06	1	2	1	2
	Q8I630_Q8I630_PLAF7	PFL0075w	57.61	3	3	0	0		Q8I535_Q8I535_PLAF7	ACS11	92.03	4	4	0	0		C0H5C2_C0H5C2_PLAF7	MAL13P1.92	16.75	1	1	1	1
	Q7KQL3_ARF1_PLAF7	ARF1	20.9	0	0	3	3		Q8I2B1_Q8I2B1_PLAF7	PFA_0145c	73.4	4	4	0	0		Q8IIR6_Q8IIR6_PLAF7	PF11_0099	62.34	1	1	1	1
	Q8IHY0_Q8IHY0_PLAF7	PF11_0396	105.34	3	3	0	0		Q8IIR7_Q8IIR7_PLAF7	ERC	39.35	4	4	0	0		O97250_O97250_PLAF7	PFC0300c	30.5	1	2	0	0
	Q8I566_Q8I566_PLAF7	PFL1720w	49.75	0	0	3	3		Q8I5R7_SYP_PLAF7	proRS	86.59	4	4	0	0		Q8IFP3_Q8IFP3_PLAF7	PFD1050w	49.66	1	2	0	0
	Q8I3X4_Q8I3X4_PLAF7	PFE0660c	26.84	0	0	3	3		Q8I5C4_Q8I5C4_PLAF7	PFL1425w	60.62	4	4	0	0		O97320_O97320_PLAF7	PFC0920w	16.44	1	1	1	1
	O96212_O96212_PLAF7	PFB0595w	37.33	0	0	3	3		Q8IL80_Q8IL80_PLAF7	TPx1	21.79	4	4	0	0		C6KSQ9_C6KSQ9_PLAF7	PFF0300w	67.86	1	1	1	1
	Q8IDK7_Q8IDK7_PLAF7	PF13_0257	101.35	0	0	3	3		O96220_O96220_PLAF7	PFB0635w	60.92	4	4	0	0		C0H522_C0H522_PLAF7	PFI0330c	95.45	0	0	1	2
	Q8IL58_Q8IL58_PLAF7	PF14_0391	24.79	0	0	3	3		Q8I5Y9_Q8I5Y9_PLAF7	PFL0280c	38.99	4	4	0	0		Q8IDM2_Q8IDM2_PLAF7	PF13_0253	66	1	1	0	0
	Q8IJW4_Q8IJW4_PLAF7	PF10_0077	63.07	0	0	3	3		Q7K6A0_Q7K6A0_PLAF7	PfPKAc	40.17	4	4	0	0		Q8IJZ3_Q8IJZ3_PLAF7	PF10_0047	106.23	1	1	0	0
	Q7KQK0_Q7KQK0_PLAF7	PKAr	50.8	0	0	3	3		Q8IKL5_Q8IKL5_PLAF7	PF14_0589	127.99	4	4	0	0		O96185_YPF08_PLAF7	PFB0460c	307.95	1	1	0	0
	Q8IJD4_RSSA_PLAF7	PF10_0264	29.84	0	0	3	3		Q8IM09_Q8IM09_PLAF7	PF14_0084	851.35	3	6	0	0		Q8IDV1_Q8IDV1_PLAF7	PF13_0213	25.52	1	1	0	0
	Q8ILY9_Q8ILY9_PLAF7	PF14_0104	51.21	0	0	3	3		Q8IDR9_Q8IDR9_PLAF7	PF13_0228	35.36	3	4	2	2		Q8IAZ3_Q8IAZ3_PLAF7	MAL8P1.83	31	1	1	0	0
	Q8I5T2_Q8I5T2_PLAF7	PFL0595c	23.94	3	3	0	0		Q8IJD0_Q8IJD0_PLAF7	PF10_0268	43.9	3	5	0	0		C6S3D7_C6S3D7_PLAF7	PF10_0409	34.78	0	0	1	1
	Q8IAW0_Q8IAW0_PLAF7	PF08_0087	61.12	2	2	1	1		O00806_RLA2_PLAF7	MAL3P3.19	11.94	3	5	0	0		C6KT55_C6KT55_PLAF7	PFF1050w	20.61	1	1	0	0
	Q8II43_Q8II43_PLAF7	PF11_0331	60.22	0	0	3	3		Q8IDI5_Q8IDI5_PLAF7	PF13_0268	23.4	2	2	2	3		Q8IB14_Q8IB14_PLAF7	PfHMGB2	11.53	1	1	0	0
	Q9TY94_Q9TY94_PLAF7	UAP56	52.19	0	0	3	3		O77395_O77395_PLAF7	PFC0735w	14.86	3	3	2	2		Q6ZLZ9_Q6ZLZ9_PLAF7	PFI0180w	50.26	1	1	0	0
	Q8I3T1_Q8I3T1_PLAF7	PFE0885w	84	0	0	3	3		Q8I603_Q8I603_PLAF7	PFL0210c	17.62	3	4	1	1		Q8IBZ5_Q8IBZ5_PLAF7	PF07_0038	153.38	1	1	0	0
	O96220_O96220_PLAF7	PFB0635w	60.92	0	0	3	3		Q8IIX0_Q8IIX0_PLAF7	PF11_0043	13.01	3	5	0	0		Q8IB67_Q8IB67_PLAF7	gcn5	170.81	1	1	0	0
	O97282_O97282_PLAF7	PFC0900w	59.14	0	0	3	3		Q8IJV6_Q8IJV6_PLAF7	PF10_0086	27.59	3	4	0	0		C6KSX7_C6KSX7_PLAF7	PFF0655c	159.67	1	1	0	0
	Q8IBQ6_Q8IBQ6_PLAF7	PF07_0079	20.21	0	0	3	3		Q8IDV1_Q8IDV1_PLAF7	PF13_0213	25.52	3	4	0	0		Q8ILJ7_Q8ILJ7_PLAF7	PF14_0246	133.87	1	1	0	0
	Q8ILI2_Q8ILI2_PLAF7	PF14_0261	42.61	0	0	3	3		Q8IIM8_Q8IIM8_PLAF7	PF11_0142	42.68	3	4	0	0		Q8IDS6_Q8IDS6_PLAF7	PF13_0224	21.73	0	0	1	1
	Q8IL48_Q8IL48_PLAF7	PF14_0401	46.41	0	0	3	3		O15770_GSHR_PLAF7	GR3	56.46	3	4	0	0		Q8ILU8_Q8ILU8_PLAF7	PF14_0146	22.32	1	1	0	0
	Q8I501_Q8I501_PLAF7	PFL2060c	52.31	0	0	3	3		Q8III5_Q8III5_PLAF7	PF11_0189	173.52	3	4	0	0		C6KTB8_C6KTB8_PLAF7	PfPK4	364.1	1	1	0	0
	Q8IKM5_Q8IKM5_PLAF7	PF14_0579	16.73	0	0	3	3		Q8I492_Q8I492_PLAF7	MESA	168.19	3	4	0	0		Q8I3Y8_Q8I3Y8_PLAF7	PFE0585c	69.07	1	1	0	0
	Q8IE85_Q8IE85_PLAF7	PF13_0129	21.59	0	0	3	3		Q8I3T1_Q8I3T1_PLAF7	PFE0885w	84	3	4	0	0		Q9U0H9_Q9U0H9_PLAF7	PFD0540c	117.45	1	1	0	0
	C0H4U5_C0H4U5_PLAF7	PF08_0081	76.81	0	0	3	3		Q8I5Y3_Q8I5Y3_PLAF7	PFL0310c	115.94	3	4	0	0		Q8IBH8_Q8IBH8_PLAF7	PF07_0116	230.29	1	1	0	0
	Q8ID43_Q8ID43_PLAF7	PF13_0349	17	0	0	3	3		Q8I468_Q8I468_PLAF7	PFE0160c	37.68	3	4	0	0		O97248_O97248_PLAF7	PFC0290w	16.12	0	0	1	1
	O96258_O96258_PLAF7	PFB0830w	12.5	2	9	2	5		P62203_CALM_PLAF7	PF14_0323	16.92	3	3	0	0		O97244_O97244_PLAF7	PFC0270w	41.56	1	1	0	0
	Q8IEK0_Q8IEK0_PLAF7	PF13_0067	159.2	0	0	2	6		Q8IKQ7_Q8IKQ7_PLAF7	PF14_0546	75.94	3	3	0	0		Q8I3X4_Q8I3X4_PLAF7	PFE0660c	26.84	0	0	1	1
	Q8IDI5_Q8IDI5_PLAF7	PF13_0268	23.4	2	2	2	3		Q8IKC9_Q8IKC9_PLAF7	PF14_0676	22.85	3	3	0	0		Q8IIU3_Q8IIU3_PLAF7	PF11_0071	53.37	1	1	0	0
	C6KSY6_C6KSY6_PLAF7	PFF0700c	21.57	2	2	2	3		Q8I1R6_Q8I1R6_PLAF7	DHFR-TS	71.69	3	3	0	0		Q8I1S0_Q8I1S0_PLAF7	sar1	22.01	1	1	0	0
	Q8IIV2_Q8IIV2_PLAF7	PF11_0061	11.45	2	2	2	2		Q8I5D2_ABRA_PLAF7	ABRA	86.57	3	3	0	0		Q8IJK6_Q8IJK6_PLAF7	PF10_0189	145.74	1	1	0	0
	Q8I603_Q8I603_PLAF7	PFL0210c	17.62	1	1	2	3		C0H4U5_C0H4U5_PLAF7	PF08_0081	76.81	3	3	0	0		Q8IDW4_Q8IDW4_PLAF7	PF13_0204	45.99	1	1	0	0
	Q8I3T9_Q8I3T9_PLAF7	PFE0845c	27.98	1	1	2	3		Q8I5F4_Q8I5F4_PLAF7	PFL1270w	33.25	3	3	0	0		Q8I603_Q8I603_PLAF7	PFL0210c	17.62	1	1	0	0
	C6S3J6_C6S3J6_PLAF7	PF14_0575a	8.01	2	2	2	2		Q8IAU3_Q8IAU3_PLAF7	DHPS	83.32	3	3	0	0		Q8IHT9_Q8IHT9_PLAF7	PF11_0438	16.26	1	1	0	0
	SjGST_Schistosoma		25.48	2	4	0	0		Q8II43_Q8II43_PLAF7	PF11_0331	60.22	3	3	0	0		Q8IDM3_Q8IDM3_PLAF7	MAL13P1.237	42.13	1	1	0	0
	O00806_RLA2_PLAF7	MAL3P3.19	11.94	1	1	2	2		Q8IDG3_Q8IDG3_PLAF7	PF13_0282	27.93	3	3	0	0		Q8I535_Q8I535_PLAF7	ACS11	92.03	1	1	0	0
	Q8IKH8_Q8IKH8_PLAF7	PF14_0627	24.65	2	2	1	1		C0H490_C0H490_PLAF7	cGloII	30.51	3	3	0	0		C6KTB4_C6KTB4_PLAF7	PFF1350c	113.81	1	1	0	0
	Q8I467_CADF1_PLAF7	PFE0165w	13.73	2	2	1	1		Q8IBQ5_Q8IBQ5_PLAF7	PF07_0080	16.47	3	3	0	0		Q8IJT1_Q8IJT1_PLAF7	PF10_0111	30.58	1	1	0	0
	C0H5C2_C0H5C2_PLAF7	MAL13P1.92	16.75	1	1	2	2		Q8IHY0_Q8IHY0_PLAF7	PF11_0396	105.34	3	3	0	0		Q8IEB3_Q8IEB3_PLAF7	PF13_0116	149.08	0	0	1	1
	Q8I5S6_Q8I5S6_PLAF7	PFL0625c	165.96	1	1	2	2		Q9TY95_SERA_PLAF7	SERA	111.7	3	3	0	0		Q8IIB7_Q8IIB7_PLAF7	PF11_0257	49.88	1	1	0	0
	O97319_O97319_PLAF7	PFC0870w	17.69	1	1	2	2		Q8IES0_Q8IES0_PLAF7	PF13_0021	25.18	3	3	0	0		Q8I374_Q8I374_PLAF7	PFI0370c	33.11	1	1	0	0
	Q8I535_Q8I535_PLAF7	ACS11	92.03	1	1	2	2		O96153_O96153_PLAF7	PFB0260w	108.29	3	3	0	0		C6KST5_C6KST5_PLAF7	PFF0430w	61.49	1	1	0	0
	O97320_O97320_PLAF7	PFC0920w	16.44	1	1	2	2		Q8I5L6_Q8I5L6_PLAF7	PFL0930w	232.8	3	3	0	0		Q8ILA9_Q8ILA9_PLAF7	PF14_0336	30.46	1	1	0	0
	Q8ILK2_Q8ILK2_PLAF7	PF14_0241	19.38	1	1	2	2		Q8IJZ7_Q8IJZ7_PLAF7	PF10_0043	23.74	3	3	0	0		Q8IL48_Q8IL48_PLAF7	PF14_0401	46.41	1	1	0	0
	Q8I2B1_Q8I2B1_PLAF7	PFA_0145c	73.4	1	1	2	2		Q8ID28_Q8ID28_PLAF7	MAL13P1.343	35.19	3	3	0	0		C0H4C6_C0H4C6_PLAF7	PFE0245c	354.95	1	1	0	0
	Q8IJ74_Q8IJ74_PLAF7	PF10_0325	32.82	0	0	2	2		Q8I3T5_Q8I3T5_PLAF7	PFE0865c	34.54	3	3	0	0		Q8I5R7_SYP_PLAF7	proRS	86.59	1	1	0	0
	Q8I3V8_Q8I3V8_PLAF7	PFE0750c	98.32	2	2	0	0		Q8II72_Q8II72_PLAF7	PF11_0302	51.92	3	3	0	0		Q8IAM2_Q8IAM2_PLAF7	1-cyspxn	25.15	0	0	1	1
	Q8IDG3_Q8IDG3_PLAF7	PF13_0282	27.93	0	0	2	2		Q8ILS7_Q8ILS7_PLAF7	PF14_0167	16.64	3	3	0	0		O97290_O97290_PLAF7	PFC0955w	86.59	1	1	0	0
	P62203_CALM_PLAF7	PF14_0323	16.92	0	0	2	2		C6KTA3_C6KTA3_PLAF7	PFF1295w	43.62	3	3	0	0		Q8IK99_Q8IK99_PLAF7	PF14_0707	101.22	0	0	1	1
	Q8IJX3_Q8IJX3_PLAF7	PF10_0068	29.51	0	0	2	2		Q8I5C5_Q8I5C5_PLAF7	MIF	12.84	3	3	0	0		Q8I3F9_Q8I3F9_PLAF7	PFE1545c	309.28	1	1	0	0
	Q8IKL5_Q8IKL5_PLAF7	PF14_0589	127.99	0	0	2	2		Q8I4V8_Q8I4V8_PLAF7	FKBP35	34.8	3	3	0	0		Q8ILC4_Q8ILC4_PLAF7	PfTKL-4	186.55	0	0	1	1
	C0H4N1_C0H4N1_PLAF7	MAL7P1.83	108.86	2	2	0	0		O96203_O96203_PLAF7	PFB0550w	48.03	3	3	0	0		Q8I5C5_Q8I5C5_PLAF7	MIF	12.84	0	0	1	1
	Q8I1V1_Q8I1V1_PLAF7	PFD0665c	44.64	0	0	2	2		Q8ILK1_Q8ILK1_PLAF7	PF14_0242	47.42	3	3	0	0		Q8IBA8_Q8IBA8_PLAF7	MAL8P1.18	203.67	0	0	1	1
	C0H570_C0H570_PLAF7	PFI1435w	33.58	0	0	2	2		Q8I3X4_Q8I3X4_PLAF7	PFE0660c	26.84	2	3	1	2
	Q8I3J0_Q8I3J0_PLAF7	PFE1370w	51.09	0	0	2	2		Q8I502_Q8I502_PLAF7	PFL2055w	16.06	2	3	1	1
	C6KST3_C6KST3_PLAF7	PFF0420c	26.51	0	0	2	2		C6KSR8_C6KSR8_PLAF7	PFF0345w	112.29	2	4	0	0
	C0H4E8_C0H4E8_PLAF7	PFE0915c	27.25	0	0	2	2		Q9NLB2_Q9NLB2_PLAF7	GRX1	12.41	2	3	0	0
	Q8IM38_Q8IM38_PLAF7	PF14_0053	40.57	0	0	2	2		Q8IJX3_Q8IJX3_PLAF7	PF10_0068	29.51	2	3	0	0
	Q8III6_Q8III6_PLAF7	PF11_0188	108.4	0	0	2	2		Q8IJ74_Q8IJ74_PLAF7	PF10_0325	32.82	2	2	1	1
	Q8ILL2_Q8ILL2_PLAF7	PF14_0231	32.66	0	0	2	2		O77361_O77361_PLAF7	PFC0435w	153.99	2	3	0	0
	Q8IAR6_Q8IAR6_PLAF7	PF08_0109	55.03	0	0	2	2		Q8I320_Q8I320_PLAF7	PfEF-1beta	32.01	2	2	1	1
	Q8I3Z5_TCTP_PLAF7	TCTP	19.97	0	0	2	2		Q8IJN9_Q8IJN9_PLAF7	PF10_0153	62.51	2	3	0	0
	C6KT82_C6KT82_PLAF7	PFF1185w	315.42	2	2	0	0		Q8IL58_Q8IL58_PLAF7	PF14_0391	24.79	2	3	0	0
	Q8IHT9_Q8IHT9_PLAF7	PF11_0438	16.26	0	0	2	2		Q8IDC6_Q8IDC6_PLAF7	MAL13P1.284	28.36	2	3	0	0
	Q8I2Q0_Q8I2Q0_PLAF7	PFI1270w	24.68	0	0	2	2		Q8IIV2_Q8IIV2_PLAF7	PF11_0061	11.45	2	2	1	1
	O77396_O77396_PLAF7	PFC0745c	29.27	0	0	2	2		Q8IIV1_Q8IIV1_PLAF7	PF11_0062	13.12	2	3	0	0
	Q8I5Y9_Q8I5Y9_PLAF7	PFL0280c	38.99	2	2	0	0		Q8IKA6_Q8IKA6_PLAF7	PF14_0700	52.42	2	3	0	0
	C0H571_C0H571_PLAF7	RhopH2	162.56	0	0	2	2		Q8IBH7_Q8IBH7_PLAF7	PF07_0117	37.8	2	3	0	0
	Q8IIB7_Q8IIB7_PLAF7	PF11_0257	49.88	0	0	2	2		Q8IKM5_Q8IKM5_PLAF7	PF14_0579	16.73	2	2	1	1
	Q8IJT1_Q8IJT1_PLAF7	PF10_0111	30.58	0	0	2	2		Q8IAR7_Q8IAR7_PLAF7	MAL8P1.125	43.43	2	3	0	0
	C6KTB4_C6KTB4_PLAF7	PFF1350c	113.81	2	2	0	0		Q8I257_Q8I257_PLAF7	PFA_0420w	19.72	2	3	0	0
	C0H5F2_C0H5F2_PLAF7	MAL13P1.172	28.07	0	0	2	2		C0H4E8_C0H4E8_PLAF7	PFE0915c	27.25	2	3	0	0
	Q8I2X7_Q8I2X7_PLAF7	PFI0860c	94.09	2	2	0	0		Q8IDK7_Q8IDK7_PLAF7	PF13_0257	101.35	2	3	0	0
	Q8IL94_Q8IL94_PLAF7	PF14_0352	96.84	0	0	2	2		Q8IDB7_Q8IDB7_PLAF7	PF13_0315	57.08	2	3	0	0
	Q8I1R6_Q8I1R6_PLAF7	DHFR-TS	71.69	2	2	0	0		Q8I562_Q8I562_PLAF7	PFL1745c	51.5	2	3	0	0
	O97313_RS3A_PLAF7	MAL3P7.35	30.03	0	0	2	2		Q8I6U8_GBP_PLAF7	GBP	95.79	2	3	0	0
	O97266_O97266_PLAF7	PFC0635c	26.93	0	0	2	2		Q8I2W3_Q8I2W3_PLAF7	PFI0930c	31.81	2	3	0	0
	Q8I3L4_Q8I3L4_PLAF7	PfACS10	76.8	0	0	2	2		C6S3J6_C6S3J6_PLAF7	PF14_0575a	8.01	0	0	2	3
	O96203_O96203_PLAF7	PFB0550w	48.03	0	0	2	2		Q8IAX6_Q8IAX6_PLAF7	PF08_0075	25.43	0	0	2	3
	Q8IBH7_Q8IBH7_PLAF7	PF07_0117	37.8	0	0	2	2		Q8IAR6_Q8IAR6_PLAF7	PF08_0109	55.03	2	2	0	0
	C0H4L6_C0H4L6_PLAF7	MAL7P1.204	196.45	0	0	2	2		Q8IL02_Q8IL02_PLAF7	PF14_0448	29.94	2	2	0	0
	Q8IAX6_Q8IAX6_PLAF7	PF08_0075	25.43	0	0	2	2		O97266_O97266_PLAF7	PFC0635c	26.93	2	2	0	0
	C6KT23_C6KT23_PLAF7	PFF0885w	16.71	2	2	0	0		Q8IE10_Q8IE10_PLAF7	PF13_0170	108.46	2	2	0	0
	O97225_O97225_PLAF7	PFC0165w	267.81	2	2	0	0		Q8IJW4_Q8IJW4_PLAF7	PF10_0077	63.07	2	2	0	0
	Q8IJR8_Q8IJR8_PLAF7	PF10_0124	170.91	2	2	0	0		Q8I261_Q8I261_PLAF7	PFA_0400c	23.07	2	2	0	0
	Q8IDY6_Q8IDY6_PLAF7	PF13_0190	62.63	0	0	2	2		Q8IM71_Q8IM71_PLAF7	PF14_0020	52.17	2	2	0	0
	Q8IJX5_Q8IJX5_PLAF7	PF10_0066	23.17	1	1	1	1		Q8I4U5_Q8I4U5_PLAF7	PFL2345c	49.51	2	2	0	0
	Q8IAZ3_Q8IAZ3_PLAF7	MAL8P1.83	31	1	1	1	1		Q8II01_Q8II01_PLAF7	TSN	128.47	2	2	0	0
	Q8ILV2_Q8ILV2_PLAF7	PF14_0141	25.2	1	1	1	1		Q8IJW0_Q8IJW0_PLAF7	PF10_0081	49.81	2	2	0	0
	Q8IEU2_Q8IEU2_PLAF7	pfg27-25	25.99	1	1	1	1		Q8IIS9_Q8IIS9_PLAF7	PF11_0086	381.64	2	2	0	0
	Q8II62_Q8II62_PLAF7	PF11_0312	10.31	1	1	1	1		Q8I2Q0_Q8I2Q0_PLAF7	PFI1270w	24.68	2	2	0	0
	Q8IJW6_Q8IJW6_PLAF7	ApiAP2	182.55	1	2	0	0		Q8ILL2_Q8ILL2_PLAF7	PF14_0231	32.66	2	2	0	0
	Q8IIU3_Q8IIU3_PLAF7	PF11_0071	53.37	1	1	1	1		Q8IDF6_PURA_PLAF7	Adss	50.03	2	2	0	0
	Q8I5C5_Q8I5C5_PLAF7	MIF	12.84	1	1	1	1		Q8I5M9_Q8I5M9_PLAF7	PFL0865w	56.05	2	2	0	0
	Q8ILB6_Q8ILB6_PLAF7	PF14_0329	28.85	0	0	1	2		Q8II92_Q8II92_PLAF7	PF11_0282	19.56	2	2	0	0
	C0H4L5_C0H4L5_PLAF7	MAL7P1.320	10.53	0	0	1	2		Q8IHT9_Q8IHT9_PLAF7	PF11_0438	16.26	2	2	0	0
	C0H4K8_C0H4K8_PLAF7	MAL7P1.300	6.41	1	2	0	0		Q8IL94_Q8IL94_PLAF7	PF14_0352	96.84	2	2	0	0
	Q8IJZ5_Q8IJZ5_PLAF7	PF10_0045	357.85	1	2	0	0		Q8IIC4_Q8IIC4_PLAF7	PF11_0250	16	2	2	0	0
	Q8I5A2_Q8I5A2_PLAF7	PFL1535w	130.7	1	2	0	0		Q8I4T1_VPS26_PLAF7	PFL2415w	34.49	2	2	0	0
	Q8I3F3_Q8I3F3_PLAF7	ETRAMP5	19.02	0	0	1	1		Q8IJT1_Q8IJT1_PLAF7	PF10_0111	30.58	2	2	0	0
	Q6ZLZ9_Q6ZLZ9_PLAF7	PFI0180w	50.26	0	0	1	1		Q8ILK2_Q8ILK2_PLAF7	PF14_0241	19.38	2	2	0	0
	Q8ILQ3_Q8ILQ3_PLAF7	PF14_0191	59.66	1	1	0	0		Q8I2Y5_Q8I2Y5_PLAF7	PFI0820c	45.12	2	2	0	0
	Q8IJW0_Q8IJW0_PLAF7	PF10_0081	49.81	0	0	1	1		Q8IIB7_Q8IIB7_PLAF7	PF11_0257	49.88	2	2	0	0
	Q8I374_Q8I374_PLAF7	PFI0370c	33.11	0	0	1	1		Q8IBN7_Q8IBN7_PLAF7	MAL7P1.114	24.78	2	2	0	0
	Q8IK90_Q8IK90_PLAF7	PF14_0716	28.82	0	0	1	1		O97319_O97319_PLAF7	PFC0870w	17.69	2	2	0	0
	Q8IB14_Q8IB14_PLAF7	PfHMGB2	11.53	0	0	1	1		Q8I3R6_Q8I3R6_PLAF7	PFE0975c	15.38	2	2	0	0
	Q8IDV2_Q8IDV2_PLAF7	MAL13P1.190	59.03	0	0	1	1		Q8IB57_Q8IB57_PLAF7	MAL8P1.48	9.51	2	2	0	0
	Q8II42_Q8II42_PLAF7	PF11_0332	31.71	0	0	1	1		Q8IB14_Q8IB14_PLAF7	PfHMGB2	11.53	2	2	0	0
	Q8I512_Q8I512_PLAF7	PFL2005w	37.61	0	0	1	1		Q8IIA8_Q8IIA8_PLAF7	PF11_0266	14.33	2	2	0	0
	Q8II82_Q8II82_PLAF7	PF11_0292	29.12	0	0	1	1		O77346_O77346_PLAF7	PFC0515c	147.86	0	0	2	2
	Q8I2U5_Q8I2U5_PLAF7	PFI1020c	56.11	0	0	1	1		Q8I3Y6_PFD6_PLAF7	PFE0595w	13.66	2	2	0	0
	Q8I3J4_Q8I3J4_PLAF7	PFE1350c	17.4	0	0	1	1		Q8I5P5_Q8I5P5_PLAF7	PFL0780w	41.21	2	2	0	0
	Q8IHP6_Q8IHP6_PLAF7	PF11_0483	109.76	1	1	0	0		C6KTB3_C6KTB3_PLAF7	PFF1345w	132.75	2	2	0	0
	Q9NLB2_Q9NLB2_PLAF7	GRX1	12.41	0	0	1	1		Q8IBV2_Q8IBV2_PLAF7	PF07_0057	47.32	2	2	0	0
	Q8IJ72_Q8IJ72_PLAF7	PF10_0328	55.9	0	0	1	1		Q8IAM2_Q8IAM2_PLAF7	1-cyspxn	25.15	2	2	0	0
	Q8ILK3_Q8ILK3_PLAF7	PF14_0240	18.78	0	0	1	1		Q8IIG7_YPF05_PLAF7	PF11_0207	128.87	2	2	0	0
	Q8I4U5_Q8I4U5_PLAF7	PFL2345c	49.51	0	0	1	1		Q8I5Q3_Q8I5Q3_PLAF7	Cpn10	11.14	2	2	0	0
	Q8IKA6_Q8IKA6_PLAF7	PF14_0700	52.42	0	0	1	1		Q8ILN7_Q8ILN7_PLAF7	PF14_0206	122.91	2	2	0	0
	Q8I5M9_Q8I5M9_PLAF7	PFL0865w	56.05	1	1	0	0		Q8ILT0_Q8ILT0_PLAF7	PF14_0164	52.51	2	2	0	0
	Q8IE09_Q8IE09_PLAF7	PF13_0171	14.98	0	0	1	1		Q8IL13_Q8IL13_PLAF7	PF14_0437	60	2	2	0	0
	C6KTA3_C6KTA3_PLAF7	PFF1295w	43.62	0	0	1	1		Q8IBP0_Q8IBP0_PLAF7	PF07_0087	29.23	2	2	0	0
	Q8IIS8_Q8IIS8_PLAF7	Rad51	38.57	0	0	1	1		Q8I6Z4_Q8I6Z4_PLAF7	MAL13P1.344	70.23	2	2	0	0
	Q8IJA4_Q8IJA4_PLAF7	PF10_0294	149.27	0	0	1	1		Q8I2U5_Q8I2U5_PLAF7	PFI1020c	56.11	2	2	0	0
	Q8I5U6_Q8I5U6_PLAF7	PFL0515w	24.53	1	1	0	0		Q8IJI4_Q8IJI4_PLAF7	PF10_0213	267.22	2	2	0	0
	Q8I6U4_Q8I6U4_PLAF7	PF11_0165	55.89	0	0	1	1		Q8I4Y3_Q8I4Y3_PLAF7	PFL2150c	39.67	2	2	0	0
	Q8IHT2_Q8IHT2_PLAF7	PF11_0447	17.86	0	0	1	1		Q8ILG6_Q8ILG6_PLAF7	PF14_0277	159.87	2	2	0	0
	Q8IB67_Q8IB67_PLAF7	gcn5	170.81	1	1	0	0		Q8IJI6_Q8IJI6_PLAF7	PF10_0211	829.68	2	2	0	0
	C6KSR4_C6KSR4_PLAF7	PFF0325c	280.19	1	1	0	0		Q8I5H2_Q8I5H2_PLAF7	PFL1180w	31.53	2	2	0	0
	Q8IAU3_Q8IAU3_PLAF7	DHPS	83.32	0	0	1	1		C0H4C9_C0H4C9_PLAF7	PFE0320w	469.59	0	0	2	2
	O97244_O97244_PLAF7	PFC0270w	41.56	0	0	1	1		Q8IHN4_Q8IHN4_PLAF7	PF11_0506	688.87	2	2	0	0
	Q8IJ77_Q8IJ77_PLAF7	PF10_0322	168.06	1	1	0	0		SAV_STRAV		18.82	1	124	1	133
	Q8ILJ7_Q8ILJ7_PLAF7	PF14_0246	133.87	1	1	0	0		Q8I4W6_Q8I4W6_PLAF7	PFL2235w	46.79	0	0	1	9
	C6KSV3_C6KSV3_PLAF7	PfTK	75.77	0	0	1	1		Q8IB66_Q8IB66_PLAF7	MAL8P1.40	32.42	1	3	0	0
	Q8I4Y5_Q8I4Y5_PLAF7	PFL2140c	37.26	1	1	0	0		Q8I3B0_Q8I3B0_PLAF7	PFI0190w	15.52	1	1	1	2
	Q8II71_Q8II71_PLAF7	PF11_0303	46.59	0	0	1	1		Q8I3I5_Q8I3I5_PLAF7	PFE1405c	61.38	1	3	0	0
	Q8I6U8_GBP_PLAF7	GBP	95.79	1	1	0	0		Q8I3F3_Q8I3F3_PLAF7	ETRAMP5	19.02	1	2	0	0
	Q8IBT2_Q8IBT2_PLAF7	MAL7P1.81	37.26	0	0	1	1		Q8I374_Q8I374_PLAF7	PFI0370c	33.11	1	2	0	0
	Q8IIR6_Q8IIR6_PLAF7	PF11_0099	62.34	0	0	1	1		Q8I1V1_Q8I1V1_PLAF7	PFD0665c	44.64	1	2	0	0
	Q8II16_Q8II16_PLAF7	PF11_0359	56.8	0	0	1	1		Q8IBR6_Q8IBR6_PLAF7	MAL7P1.94	22.63	1	2	0	0
	Q8I5Q3_Q8I5Q3_PLAF7	Cpn10	11.14	0	0	1	1		C0H5C2_C0H5C2_PLAF7	MAL13P1.92	16.75	1	1	1	1
	Q8I553_Q8I553_PLAF7	PFL1790w	81.07	1	1	0	0		Q8I447_Q8I447_PLAF7	PFE0270c	156.34	1	2	0	0
	Q8IJ39_Q8IJ39_PLAF7	PF10_0361	192.51	0	0	1	1		Q8IJK8_Q8IJK8_PLAF7	PF10_0187	11.77	1	2	0	0
	Q8I312_Q8I312_PLAF7	PFI0685w	114.16	1	1	0	0		C6KTB4_C6KTB4_PLAF7	PFF1350c	113.81	1	2	0	0
	Q8ID31_Q8ID31_PLAF7	PF13_0354	165.03	0	0	1	1		Q8IL82_Q8IL82_PLAF7	PF14_0365	33.13	1	2	0	0
	Q8ILZ7_Q8ILZ7_PLAF7	PF14_0096	59.24	0	0	1	1		C0H4K8_C0H4K8_PLAF7	MAL7P1.300	6.41	1	1	1	1
	O97284_O97284_PLAF7	PFC0910w	50.12	0	0	1	1		Q8IBG4_Q8IBG4_PLAF7	MAL7P1.160	19.89	1	2	0	0
	Q8I425_Q8I425_PLAF7	PFE0385w	177.32	1	1	0	0		Q8I5A2_Q8I5A2_PLAF7	PFL1535w	130.7	1	2	0	0
	C6KSS2_C6KSS2_PLAF7	PFF0365c	76.13	0	0	1	1		Q8I5K3_Q8I5K3_PLAF7	PFL1010c	270.9	1	2	0	0
	Q8IES0_Q8IES0_PLAF7	PF13_0021	25.18	0	0	1	1		Q8I6T3_Q8I6T3_PLAF7	PF13_0156	29.94	1	2	0	0
	Q8ID38_Q8ID38_PLAF7	MAL13P1.337	18.77	0	0	1	1		Q9U0H2_Q9U0H2_PLAF7	PFD0585c	229.55	1	2	0	0
	Q8IAM2_Q8IAM2_PLAF7	1-cyspxn	25.15	0	0	1	1		C6KT64_C6KT64_PLAF7	PFF1095w	170.13	1	2	0	0
	Q8I2R8_Q8I2R8_PLAF7	PFI1175c	22.96	1	1	0	0		Q8ILH0_Q8ILH0_PLAF7	PF14_0273	332.69	0	0	1	2
	O77309_O77309_PLAF7	RhopH1(3.2)	167.38	0	0	1	1		Q8IFP3_Q8IFP3_PLAF7	PFD1050w	49.66	1	1	0	0
	Q76NL8_Q76NL8_PLAF7	flN	138.78	0	0	1	1		Q6ZLZ9_Q6ZLZ9_PLAF7	PFI0180w	50.26	1	1	0	0
	Q8IAL6_Q8IAL6_PLAF7	MAL8P1.156	117.59	0	0	1	1		O77345_O77345_PLAF7	PFC0520w	35.08	1	1	0	0
	Q8IM23_Q8IM23_PLAF7	PF14_0068	34.11	0	0	1	1		Q8I467_CADF1_PLAF7	PFE0165w	13.73	1	1	0	0
	Q8ILZ3_Q8ILZ3_PLAF7	PF14_0100	98.46	1	1	0	0		Q8IJM0_Q8IJM0_PLAF7	PF10_0174	55.17	1	1	0	0
	Q8IJN9_Q8IJN9_PLAF7	PF10_0153	62.51	0	0	1	1		Q8ID85_Q8ID85_PLAF7	PF13_0330	54.6	1	1	0	0
	Q8I5V9_Q8I5V9_PLAF7	PFL0445w	166.76	1	1	0	0		Q8IDS0_Q8IDS0_PLAF7	PF13_0227	27.78	1	1	0	0
	O96217_O96217_PLAF7	PFB0620w	17.8	0	0	1	1		Q8IEP9_Q8IEP9_PLAF7	PF13_0034	53.79	1	1	0	0
	O97241_O97241_PLAF7	PFC0255c	16.13	0	0	1	1		Q8I2J3_Q8I2J3_PLAF7	PfM18AAP	65.59	1	1	0	0
	Q8I4V8_Q8I4V8_PLAF7	FKBP35	34.8	0	0	1	1		Q8IJU4_Q8IJU4_PLAF7	PF10_0098	35.58	1	1	0	0
	Q8I257_Q8I257_PLAF7	PFA_0420w	19.72	0	0	1	1		C6KT35_C6KT35_PLAF7	PfACS12	163.8	1	1	0	0
	Q8I5D2_ABRA_PLAF7	ABRA	86.57	0	0	1	1		C6S3F0_C6S3F0_PLAF7	PF11_0121	15.07	1	1	0	0
	Q8IKQ7_Q8IKQ7_PLAF7	PF14_0546	75.94	1	1	0	0		Q8ILW9_ACT2_PLAF7	PF14_0124	42.58	1	1	0	0
	Q8IM19_Q8IM19_PLAF7	PF14_0072	14.23	0	0	1	1		Q8ILS4_Q8ILS4_PLAF7	PF14_0170	519.5	1	1	0	0
	Q8IDD4_Q8IDD4_PLAF7	MAL13P1.278	475.42	1	1	0	0		Q8I2P8_Q8I2P8_PLAF7	PFI1280c	366.73	1	1	0	0
	Q8I3F2_Q8I3F2_PLAF7	PFE1595c	27.28	0	0	1	1		O77310_O77310_PLAF7	RhopH1(3.1)	167.13	1	1	0	0
	Q8IJM0_Q8IJM0_PLAF7	PF10_0174	55.17	0	0	1	1		Q8I3Z5_TCTP_PLAF7	TCTP	19.97	1	1	0	0
	Q8I238_Q8I238_PLAF7	PFA_0520c	50.7	0	0	1	1		Q8IJZ3_Q8IJZ3_PLAF7	PF10_0047	106.23	1	1	0	0
	Q8IDD9_Q8IDD9_PLAF7	PF13_0301	22.87	0	0	1	1		Q8I4Y5_Q8I4Y5_PLAF7	PFL2140c	37.26	1	1	0	0
	C0H4C6_C0H4C6_PLAF7	PFE0245c	354.95	1	1	0	0		O97244_O97244_PLAF7	PFC0270w	41.56	1	1	0	0
	Q8I713_Q8I713_PLAF7	PF11_0106	12.78	0	0	1	1		Q9U0N0_Q9U0N0_PLAF7	PFA_0625w	192.23	1	1	0	0
	Q8IAL4_Q8IAL4_PLAF7	PF08_0134	14.78	0	0	1	1		Q8I1Q5_Q8I1Q5_PLAF7	PFD0880w	51	1	1	0	0
	Q8IBP8_Q8IBP8_PLAF7	PF07_0085	72.68	0	0	1	1		C0H579_C0H579_PLAF7	PFI1525w	37.14	1	1	0	0
	Q8I463_Q8I463_PLAF7	PFE0185c	14.06	1	1	0	0		Q8ID38_Q8ID38_PLAF7	MAL13P1.337	18.77	1	1	0	0
	C0H5G3_C0H5G3_PLAF7	MAL13P1.209	21.44	0	0	1	1		Q8I3U6_Q8I3U6_PLAF7	PFE0810c	16.07	1	1	0	0
	C0H493_C0H493_PLAF7	PFD0340c	207.7	1	1	0	0		Q8IE09_Q8IE09_PLAF7	PF13_0171	14.98	1	1	0	0
	Q8IBY4_Q8IBY4_PLAF7	PF07_0043	17.34	0	0	1	1		Q8II16_Q8II16_PLAF7	PF11_0359	56.8	1	1	0	0
	Q8ILA9_Q8ILA9_PLAF7	PF14_0336	30.46	1	1	0	0		Q8IL71_Q8IL71_PLAF7	PF14_0377	27.67	1	1	0	0
	Q8IIV3_Q8IIV3_PLAF7	PF11_0060	195.06	0	0	1	1		C6KSP9_C6KSP9_PLAF7	PFF0250w	85.58	1	1	0	0
	Q8IDC6_Q8IDC6_PLAF7	MAL13P1.284	28.36	0	0	1	1		Q8II71_Q8II71_PLAF7	PF11_0303	46.59	1	1	0	0
	Q8IBV6_Q8IBV6_PLAF7	PF07_0055	81.99	0	0	1	1		O97320_O97320_PLAF7	PFC0920w	16.44	1	1	0	0
	C0H4C9_C0H4C9_PLAF7	PFE0320w	469.59	1	1	0	0		Q8I2G2_Q8I2G2_PLAF7	CLAG9	160.31	1	1	0	0
	C0H5H6_C0H5H6_PLAF7	MAL13P1.234	696.61	1	1	0	0		Q8I444_Q8I444_PLAF7	PfSUMO	11.05	1	1	0	0
	Q8IM21_Q8IM21_PLAF7	PF14_0070	81.71	1	1	0	0		Q8I3T4_Q8I3T4_PLAF7	PFE0870w	132.6	1	1	0	0
	Q8IDG7_YPF01_PLAF7	PF13_0277	248.1	1	1	0	0		Q8I4X3_Q8I4X3_PLAF7	PFL2200w	36.42	1	1	0	0
	Q8IAZ0_Q8IAZ0_PLAF7	PF08_0068	140.14	1	1	0	0		C6KSW5_C6KSW5_PLAF7	PFF0590c	78.08	1	1	0	0
	O96244_O96244_PLAF7	PFB0755w	197.65	1	1	0	0		Q8IB48_Q8IB48_PLAF7	MAL8P1.52	14.05	1	1	0	0
									Q8I6S4_Q8I6S4_PLAF7	PfCyP24	24.88	1	1	0	0
									Q8I2T4_Q8I2T4_PLAF7	PFI1075w	28.95	1	1	0	0
									Q8I259_Q8I259_PLAF7	PFA_0410w	254.88	1	1	0	0
									Q8I3Y0_Q8I3Y0_PLAF7	PfOPRT	32.99	1	1	0	0
									Q8IEU2_Q8IEU2_PLAF7	pfg27-25	25.99	1	1	0	0
									O77321_O77321_PLAF7	PFC0340w	57.68	1	1	0	0
									O97241_O97241_PLAF7	PFC0255c	16.13	1	1	0	0
									Q8ILL5_Q8ILL5_PLAF7	PF14_0228	183.46	1	1	0	0
									Q8I3Y4_Q8I3Y4_PLAF7	gS	77.43	1	1	0	0
									Q8I5G4_Q8I5G4_PLAF7	PFL1220w	40.71	0	0	1	1
									Q8IJ39_Q8IJ39_PLAF7	PF10_0361	192.51	1	1	0	0
									Q8IL07_Q8IL07_PLAF7	CEN2	19.3	1	1	0	0
									Q8IIU3_Q8IIU3_PLAF7	PF11_0071	53.37	1	1	0	0
									Q8I3I6_Q8I3I6_PLAF7	PFE1400c	106.09	1	1	0	0
									Q8IEH3_Q8IEH3_PLAF7	MAL13P1.73	89.18	1	1	0	0
									Q8I461_Q8I461_PLAF7	PfATPase3	282.86	0	0	1	1
									O77379_O77379_PLAF7	PFC0785c	26.45	1	1	0	0
									C6KT82_C6KT82_PLAF7	PFF1185w	315.42	1	1	0	0
									Q8IM45_Q8IM45_PLAF7	PF14_0046	34.7	1	1	0	0
									O97308_O97308_PLAF7	PFA_0055c	35.69	1	1	0	0
									Q8I484_Q8I484_PLAF7	RAP2	46.71	1	1	0	0
									C0H5G3_C0H5G3_PLAF7	MAL13P1.209	21.44	1	1	0	0
									C0H5I5_C0H5I5_PLAF7	PF13_0296	10.1	1	1	0	0
									Q8I5R6_Q8I5R6_PLAF7	PFL0675c	129.2	1	1	0	0
									Q8I5T2_Q8I5T2_PLAF7	PFL0595c	23.94	1	1	0	0
									C6KSR5_C6KSR5_PLAF7	PFF0330w	176.83	1	1	0	0
									Q8I4R2_RBP3_PLAF7	Rh3	328.74	0	0	1	1
									C0H5J5_C0H5J5_PLAF7	MAL13P1.303	47.8	1	1	0	0
									C6KSY6_C6KSY6_PLAF7	PFF0700c	21.57	0	0	1	1
									O96259_O96259_PLAF7	PFB0835c	60.56	1	1	0	0
									Q8IAU1_Q8IAU1_PLAF7	PF08_0096	108.57	1	1	0	0
									Q8I1U8_Q8I1U8_PLAF7	PFD0680c	98.41	1	1	0	0
									O96260_O96260_PLAF7	PFB0840w	37.9	1	1	0	0
									Q8I3J4_Q8I3J4_PLAF7	PFE1350c	17.4	1	1	0	0
									Q8ILZ1_Q8ILZ1_PLAF7	PF14_0102	90	1	1	0	0
									Q8ILK3_Q8ILK3_PLAF7	PF14_0240	18.78	1	1	0	0
									Q8I5W3_Q8I5W3_PLAF7	PFL0425c	208.54	1	1	0	0
									Q8ILC8_Q8ILC8_PLAF7	PF14_0316	169.12	1	1	0	0
									Q8IHU1_Q8IHU1_PLAF7	PF11_0436	56.31	1	1	0	0
									Q8IL45_Q8IL45_PLAF7	TREP	412.44	0	0	1	1
									C6KSV0_C6KSV0_PLAF7	PFF0510w	15.44	1	1	0	0
									Q8IDA4_Q8IDA4_PLAF7	PF13_0318	21.13	1	1	0	0
									Q8IK02_Q8IK02_PLAF7	PF10_0038	13.5	1	1	0	0
									Q8I524_Q8I524_PLAF7	VPS16	120.22	0	0	1	1
									O77336_O77336_PLAF7	PFC0425w	533.78	1	1	0	0
									Q8IEH1_Q8IEH1_PLAF7	MAL13P1.74	54.47	0	0	1	1
									Q8II62_Q8II62_PLAF7	PF11_0312	10.31	1	1	0	0
									Q8I220_Q8I220_PLAF7	VAR	298.1	0	0	1	1
									O96160_YPF14_PLAF7	PFB0315w	207.71	0	0	1	1
									C6S3E7_C6S3E7_PLAF7	PF11_0540	46.48	0	0	1	1
									Q8IBN9_Q8IBN9_PLAF7	MAL7P1.112	113.95	1	1	0	0
									Q8IHZ9_KC1_PLAF7	CK1	37.61	1	1	0	0
									Q8IBY2_Q8IBY2_PLAF7	PF07_0045	43.94	1	1	0	0
									Q8IDB0_Q8IDB0_PLAF7	PF13_0316	17.24	1	1	0	0
									Q8IB51_Q8IB51_PLAF7	PF08_0039	16.37	1	1	0	0
									Q8IJA0_Q8IJA0_PLAF7	PF10_0298	46.77	1	1	0	0
									Q8I290_Q8I290_PLAF7	PFA_0250w	17.05	1	1	0	0
									Q8I2W4_Q8I2W4_PLAF7	PFI0925w	124.38	1	1	0	0
									Q8IKE8_Q8IKE8_PLAF7	PF14_0657	97.28	1	1	0	0
									Q8IB60_Q8IB60_PLAF7	Pfsec23	86.11	1	1	0	0
									Q8I5I8_Q8I5I8_PLAF7	GAP45	23.62	1	1	0	0
									Q8I3T9_Q8I3T9_PLAF7	PFE0845c	27.98	0	0	1	1
									Q8I323_Q8I323_PLAF7	PFI0630w	39.11	1	1	0	0
									Q8IB95_Q8IB95_PLAF7	PF08_0022	70.65	1	1	0	0
									Q8IBY4_Q8IBY4_PLAF7	PF07_0043	17.34	1	1	0	0
									Q8IDF8_Q8IDF8_PLAF7	PF13_0286	120.18	1	1	0	0
									Q8IKL9_Q8IKL9_PLAF7	PF14_0585	7.49	1	1	0	0

## Sheet: Soluble minus > 4 peptides
	reference	Gene Symbol	MWT(kDa)	Total MCMBP-BirA	Total 3D7		reference	Gene Symbol	MWT(kDa)	Total MCMBP-BirA	Total 3D7		reference	Gene Symbol	MWT(kDa)	Total MCMBP-BirA	Total 3D7
	Q8IC05_Q8IC05_PLAF7	PF07_0029	86.11	111	33		Q8ILX3_Q8ILX3_PLAF7	PF14_0120	112.7	155	0		Q8I5T4_Q8I5T4_PLAF7	PFL0580w	85.8	74	0
	Q8IC16_Q8IC16_PLAF7	PF07_0023	94.18	89	0		Q8IC05_Q8IC05_PLAF7	PF07_0029	86.11	47	6		Q8IC16_Q8IC16_PLAF7	PF07_0023	94.18	75	0
	Q8ILX3_Q8ILX3_PLAF7	PF14_0120	112.7	305	0		Q8IB24_Q8IB24_PLAF7	PF08_0054	73.87	46	11		Q8ILX3_Q8ILX3_PLAF7	PF14_0120	112.7	283	0
	Q8I5T4_Q8I5T4_PLAF7	PFL0580w	85.8	153	0		Q8I2X4_Q8I2X4_PLAF7	PFI0875w	72.34	32	4		Q8IC05_Q8IC05_PLAF7	PF07_0029	86.11	118	14
	Q8IEE5_Q8IEE5_PLAF7	PF13_0095	115.14	109	0		Q8IEK1_Q8IEK1_PLAF7	MAL13P1.56	125.98	27	0		Q8IEE5_Q8IEE5_PLAF7	PF13_0095	115.14	60	0
	Q8IDF0_Q8IDF0_PLAF7	PF13_0291	105.61	49	0		Q8I0P6_Q8I0P6_PLAF7	PF13_0304	48.93	67	7		Q8IDF0_Q8IDF0_PLAF7	PF13_0291	105.61	47	0
	Q8ILR7_Q8ILR7_PLAF7	PF14_0177	111.43	29	0		P27362_PGK_PLAF7	PGK	45.4	33	5		Q8ILA4_Q8ILA4_PLAF7	PF14_0341	67.33	48	1
	Q8IB24_Q8IB24_PLAF7	PF08_0054	73.87	27	40		Q8IC16_Q8IC16_PLAF7	PF07_0023	94.18	24	0		Q8I3J5_Q8I3J5_PLAF7	PFE1345c	109.73	34	0
	Q8I0P6_Q8I0P6_PLAF7	PF13_0304	48.93	18	30		C6KTA4_C6KTA4_PLAF7	PFF1300w	55.63	22	6		Q8ILR7_Q8ILR7_PLAF7	PF14_0177	111.43	33	0
	Q8IJN7_ENO_PLAF7	ENO	48.65	8	30		Q8I0V4_Q8I0V4_PLAF7	PFL1070c	94.96	23	0		Q8I3A1_Q8I3A1_PLAF7	PFI0235w	56.2	28	0
	Q8IEK1_Q8IEK1_PLAF7	MAL13P1.56	125.98	0	23		Q8I5T4_Q8I5T4_PLAF7	PFL0580w	85.8	23	0		Q8IB24_Q8IB24_PLAF7	PF08_0054	73.87	28	14
	Q8ILA4_Q8ILA4_PLAF7	PF14_0341	67.33	43	3		Q8IKW5_Q8IKW5_PLAF7	PF14_0486	93.46	22	0		Q8I0P6_Q8I0P6_PLAF7	PF13_0304	48.93	24	15
	Q8I3J5_Q8I3J5_PLAF7	PFE1345c	109.73	22	0		Q8IKK7_Q8IKK7_PLAF7	GAPDH	36.61	43	5		C6KSX8_C6KSX8_PLAF7	PFF0660w	123.65	23	0
	Q8I2X4_Q8I2X4_PLAF7	PFI0875w	72.34	4	24		Q8I2Z8_Q8I2Z8_PLAF7	PFI0755c	159.35	19	0		Q7K6A4_Q7K6A4_PLAF7	PfSAMS	44.82	14	7
	P27362_PGK_PLAF7	PGK	45.4	5	21		Q8IJN7_ENO_PLAF7	ENO	48.65	29	7		Q8IJN7_ENO_PLAF7	ENO	48.65	12	8
	Q8IKW5_Q8IKW5_PLAF7	PF14_0486	93.46	3	20		Q8I3Y8_Q8I3Y8_PLAF7	PFE0585c	69.07	18	0		Q8IJN8_Q8IJN8_PLAF7	PF10_0154	40.36	13	0
	Q8IKK7_Q8IKK7_PLAF7	GAPDH	36.61	11	24		Q8I0U8_Q8I0U8_PLAF7	MSP1	195.6	18	0		Q7KQL9_ALF_PLAF7	PF14_0425	40.08	17	7
	C0H4Y6_C0H4Y6_PLAF7	PfPDI-8	55.48	2	18		Q8IEE5_Q8IEE5_PLAF7	PF13_0095	115.14	17	0		Q8IJC6_Q8IJC6_PLAF7	PF10_0272	44.19	14	10
	Q7KQL9_ALF_PLAF7	PF14_0425	40.08	11	21		Q8I3M5_Q8I3M5_PLAF7	PFE1195w	127.27	14	0		O97247_O97247_PLAF7	PFC0285c	59.03	14	0
	Q8I3A1_Q8I3A1_PLAF7	PFI0235w	56.2	19	0		Q7KQL9_ALF_PLAF7	PF14_0425	40.08	18	3		Q8IDQ9_Q8IDQ9_PLAF7	PfPMT	31.02	10	6
	Q8I2Z8_Q8I2Z8_PLAF7	PFI0755c	159.35	4	14		Q8ILA4_Q8ILA4_PLAF7	PF14_0341	67.33	16	0		Q8IKK7_Q8IKK7_PLAF7	GAPDH	36.61	11	5
	Q8I0V4_Q8I0V4_PLAF7	PFL1070c	94.96	3	14		C0H4Y6_C0H4Y6_PLAF7	PfPDI-8	55.48	17	0		Q8I431_Q8I431_PLAF7	PFE0350c	46.18	8	6
	Q8IDQ9_Q8IDQ9_PLAF7	PfPMT	31.02	7	14		C0H5I7_C0H5I7_PLAF7	MAL13P1.283	57.94	15	0		C6KTA4_C6KTA4_PLAF7	PFF1300w	55.63	8	5
	Q76NM3_Q76NM3_PLAF7	PfLDH	34.09	5	17		Q8IDF0_Q8IDF0_PLAF7	PF13_0291	105.61	14	0		Q7KQK6_Q7KQK6_PLAF7	Ran	24.86	6	6
	Q7K6A4_Q7K6A4_PLAF7	PfSAMS	44.82	7	12		Q8IKT5_Q8IKT5_PLAF7	PF14_0517	88.45	14	0		Q8IKE1_Q8IKE1_PLAF7	ACC1	394.63	3	7
	C6KTA4_C6KTA4_PLAF7	PFF1300w	55.63	5	12		Q8IDQ9_Q8IDQ9_PLAF7	PfPMT	31.02	20	5		SAV1_STRVL		18.85	303	339
	C6KSX8_C6KSX8_PLAF7	PFF0660w	123.65	13	0		Q76NM3_Q76NM3_PLAF7	PfLDH	34.09	22	6		Q8I3B0_Q8I3B0_PLAF7	PFI0190w	15.52	6	13
	Q6LFH8_OAT_PLAF7	OAT	46.03	6	11		Q8I3A1_Q8I3A1_PLAF7	PFI0235w	56.2	13	0		Q8IIU8_Q8IIU8_PLAF7	PF11_0065	29.75	6	7
	Q8I3M5_Q8I3M5_PLAF7	PFE1195w	127.27	0	11		C6KT34_C6KT34_PLAF7	PFF0940c	92.33	11	0		C6KT23_C6KT23_PLAF7	PFF0885w	16.71	5	8
	Q8II24_Q8II24_PLAF7	PF11_0351	73.25	0	9		Q8IDM3_Q8IDM3_PLAF7	MAL13P1.237	42.13	13	1		O77381_O77381_PLAF7	PFC0775w	18.75	6	6
	Q8I0U8_Q8I0U8_PLAF7	MSP1	195.6	0	9		Q8I395_Q8I395_PLAF7	PFI0265c	104.79	12	0		Q6LFH8_OAT_PLAF7	OAT	46.03	5	6
	Q8I3Y8_Q8I3Y8_PLAF7	PFE0585c	69.07	0	9		Q8IC01_Q8IC01_PLAF7	PF07_0033	99.9	12	0		P27362_PGK_PLAF7	PGK	45.4	5	6
	Q8II61_Q8II61_PLAF7	PF11_0313	34.95	0	9		Q7KQK6_Q7KQK6_PLAF7	Ran	24.86	10	1		Q8I2X4_Q8I2X4_PLAF7	PFI0875w	72.34	5	5
							C6KT76_C6KT76_PLAF7	PFF1155w	55.23	10	0		Q8IKW5_Q8IKW5_PLAF7	PF14_0486	93.46	7	3
	Q8IJX8_Q8IJX8_PLAF7	PF10_0063	11.97	2	11		C0H571_C0H571_PLAF7	RhopH2	162.56	9	0		Q8I0V4_Q8I0V4_PLAF7	PFL1070c	94.96	8	1
	O97247_O97247_PLAF7	PFC0285c	59.03	7	5		Q7KQL5_TBB_PLAF7	PF10_0084	49.72	12	2		Q76NM3_Q76NM3_PLAF7	PfLDH	34.09	7	10
	C0H4V6_C0H4V6_PLAF7	MAL8P1.69	30.17	2	9		Q8IIG6_Q8IIG6_PLAF7	PF11_0208	28.75	12	1		Q8IFP2_Q8IFP2_PLAF7	PFD1055w	19.71	7	5
	Q8IIU8_Q8IIU8_PLAF7	PF11_0065	29.75	4	7		Q6LFH8_OAT_PLAF7	OAT	46.03	11	1		Q8IAX5_Q8IAX5_PLAF7	PF08_0076	16.28	4	6
	P50250_SAHH_PLAF7	PFE1050w	53.8	2	8		Q8I431_Q8I431_PLAF7	PFE0350c	46.18	8	4		Q8I2Z8_Q8I2Z8_PLAF7	PFI0755c	159.35	8	0
	Q8IIV8_Q8IIV8_PLAF7	PF11_0055	49.23	2	8		Q7K6A4_Q7K6A4_PLAF7	PfSAMS	44.82	9	1		Q7KQL5_TBB_PLAF7	PF10_0084	49.72	5	2
	Q8IKE1_Q8IKE1_PLAF7	ACC1	394.63	3	7		Q8IDJ8_Q8IDJ8_PLAF7	PF13_0262	67.55	10	0		C0H4N1_C0H4N1_PLAF7	MAL7P1.83	108.86	7	0
	Q8IIG6_Q8IIG6_PLAF7	PF11_0208	28.75	1	8		Q8II24_Q8II24_PLAF7	PF11_0351	73.25	8	1		Q8IM09_Q8IM09_PLAF7	PF14_0084	851.35	7	0
	Q8IJS7_Q8IJS7_PLAF7	PF10_0115	131.55	0	8		O97247_O97247_PLAF7	PFC0285c	59.03	9	0		Q8IBY8_Q8IBY8_PLAF7	PF07_0042	350.48	6	0
	Q8I431_Q8I431_PLAF7	PFE0350c	46.18	5	10		Q8ILC1_STI1L_PLAF7	PF14_0324	66.02	9	0		Q8IM10_Q8IM10_PLAF7	PF14_0083	25.04	4	7
	Q7KQK6_Q7KQK6_PLAF7	Ran	24.86	4	7		Q8I501_Q8I501_PLAF7	PFL2060c	52.31	8	0		Q8IKF0_Q8IKF0_PLAF7	H45	45.28	6	2
	Q8IBA0_Q8IBA0_PLAF7	PfRACK	35.66	4	7		Q8IBM9_Q8IBM9_PLAF7	MAL7P1.122	45.14	8	0		O77395_O77395_PLAF7	PFC0735w	14.86	2	5
	Q8IDV0_Q8IDV0_PLAF7	PF13_0214	47.75	0	9		Q8IDZ9_Q8IDZ9_PLAF7	PF13_0179	151.21	8	0		C0H4Y6_C0H4Y6_PLAF7	PfPDI-8	55.48	5	2
	Q7KQL5_TBB_PLAF7	PF10_0084	49.72	1	7		Q8IJX8_Q8IJX8_PLAF7	PF10_0063	11.97	10	2		O96248_O96248_PLAF7	PFB0775w	64.53	6	0
	Q8IL11_Q8IL11_PLAF7	LAP	67.78	0	7		C6KT50_C6KT50_PLAF7	PFF1025c	32.99	10	0		O77344_O77344_PLAF7	PfGSK-3	51.58	6	0
	Q8IDZ9_Q8IDZ9_PLAF7	PF13_0179	151.21	0	7		Q8IIA4_Q8IIA4_PLAF7	PF11_0270	119.47	10	0		Q8IIA2_Q8IIA2_PLAF7	PF11_0272	17.88	3	3
	Q8IJS1_Q8IJS1_PLAF7	PF10_0121	26.35	0	7		C0H551_C0H551_PLAF7	PFI1110w	63.19	9	0		Q8I3V8_Q8I3V8_PLAF7	PFE0750c	98.32	5	0
	Q8I4X0_ACT1_PLAF7	PFL2215w	41.84	1	6		Q7KQL3_ARF1_PLAF7	ARF1	20.9	9	0		Q8IHY0_Q8IHY0_PLAF7	PF11_0396	105.34	5	0
	Q8IKT5_Q8IKT5_PLAF7	PF14_0517	88.45	0	7		Q8IDV0_Q8IDV0_PLAF7	PF13_0214	47.75	8	0		Q8IJS7_Q8IJS7_PLAF7	PF10_0115	131.55	5	0
	Q8IFP2_Q8IFP2_PLAF7	PFD1055w	19.71	6	7		Q76NM6_VATA_PLAF7	vapA	68.53	8	0		Q7KQM1_PRI1_PLAF7	PF14_0366	53.46	5	0
	Q8I6V3_Q8I6V3_PLAF7	PF14_0077	51.45	2	6		Q8IJN8_Q8IJN8_PLAF7	PF10_0154	40.36	7	0		Q76NN6_Q76NN6_PLAF7	PFD0950w	33.18	5	0
	Q8ILI6_AN32_PLAF7	PF14_0257	32.99	2	5		O77312_O77312_PLAF7	PFC0135c	147.84	7	0		O96258_O96258_PLAF7	PFB0830w	12.5	15	17
	C6KT34_C6KT34_PLAF7	PFF0940c	92.33	1	6		Q8IAR3_Q8IAR3_PLAF7	MAL8P1.128	29.48	7	0		Q8IDR9_Q8IDR9_PLAF7	PF13_0228	35.36	6	9
	Q8IDM3_Q8IDM3_PLAF7	MAL13P1.237	42.13	0	7		Q8I4X0_ACT1_PLAF7	PFL2215w	41.84	32	0		Q8IEM3_Q8IEM3_PLAF7	PF13_0049	19.23	5	6
	Q8I5C4_Q8I5C4_PLAF7	PFL1425w	60.62	0	6		Q8IBA0_Q8IBA0_PLAF7	PfRACK	35.66	11	2		C0H4L5_C0H4L5_PLAF7	MAL7P1.320	10.53	4	6
	Q8IIX0_Q8IIX0_PLAF7	PF11_0043	13.01	0	6		C0H4V6_C0H4V6_PLAF7	MAL8P1.69	30.17	12	0		C6KSY6_C6KSY6_PLAF7	PFF0700c	21.57	4	5
	Q8IM15_Q8IM15_PLAF7	PF14_0078	51.66	0	6		Q8I6V3_Q8I6V3_PLAF7	PF14_0077	51.45	9	0		C0H4V6_C0H4V6_PLAF7	MAL8P1.69	30.17	5	3
	Q8IC01_Q8IC01_PLAF7	PF07_0033	99.9	0	6		C6KSX8_C6KSX8_PLAF7	PFF0660w	123.65	9	0		Q8IBQ5_Q8IBQ5_PLAF7	PF07_0080	16.47	5	3
	C6KST5_C6KST5_PLAF7	PFF0430w	61.49	0	6		Q8IBI3_Q8IBI3_PLAF7	PF07_0112	28.37	9	0		Q8IBA0_Q8IBA0_PLAF7	PfRACK	35.66	4	3
	P61074_PCNA_PLAF7	PCNA	30.57	0	6		Q8IJS1_Q8IJS1_PLAF7	PF10_0121	26.35	9	0		Q76NN7_Q76NN7_PLAF7	PfCyP19	18.94	7	0
	Q8IDJ8_Q8IDJ8_PLAF7	PF13_0262	67.55	0	6		Q8I5H4_Q8I5H4_PLAF7	PFL1170w	97.17	8	0		Q8I3R0_Q8I3R0_PLAF7	PFE1005w	22.11	4	3
	Q8IL88_Q8IL88_PLAF7	PF14_0359	48.44	4	6		Q7KQM4_PLM1_PLAF7	PF14_0076	51.43	8	0		Q8I3R6_Q8I3R6_PLAF7	PFE0975c	15.38	3	4
	Q76NN7_Q76NN7_PLAF7	PfCyP19	18.94	1	6		Q8IAM0_Q8IAM0_PLAF7	PF08_0132	160.32	8	0		Q8IDB0_Q8IDB0_PLAF7	PF13_0316	17.24	4	3
	Q8I3T5_Q8I3T5_PLAF7	PFE0865c	34.54	3	4		Q7KQM0_TPIS_PLAF7	TPI	27.92	8	0		Q8ILL3_Q8ILL3_PLAF7	PF14_0230	33.98	4	3
	Q8IAX8_Q8IAX8_PLAF7	PF08_0074	27.24	1	6		Q8IM15_Q8IM15_PLAF7	PF14_0078	51.66	7	0		Q8IAX6_Q8IAX6_PLAF7	PF08_0075	25.43	4	3
	Q8IDB0_Q8IDB0_PLAF7	PF13_0316	17.24	2	5		Q8IM16_Q8IM16_PLAF7	PF14_0075	51.01	7	0		Q8IJA9_Q8IJA9_PLAF7	PF10_0289	42.44	4	2
	Q8IBM9_Q8IBM9_PLAF7	MAL7P1.122	45.14	1	5		Q8ILR7_Q8ILR7_PLAF7	PF14_0177	111.43	7	0		C0H5I7_C0H5I7_PLAF7	MAL13P1.283	57.94	6	0
	O97250_O97250_PLAF7	PFC0300c	30.5	1	5		Q8IL11_Q8IL11_PLAF7	LAP	67.78	7	0		Q8II27_Q8II27_PLAF7	PF11_0348	101.5	3	3
	Q8IDS6_Q8IDS6_PLAF7	PF13_0224	21.73	0	6		Q8IJS7_Q8IJS7_PLAF7	PF10_0115	131.55	7	0		P50250_SAHH_PLAF7	PFE1050w	53.8	4	1
	Q8IBI3_Q8IBI3_PLAF7	PF07_0112	28.37	0	6		Q8IJR9_Q8IJR9_PLAF7	PF10_0123	63.89	7	0		Q8I468_Q8I468_PLAF7	PFE0160c	37.68	2	3
	Q8IM16_Q8IM16_PLAF7	PF14_0075	51.01	0	5		Q8IIV8_Q8IIV8_PLAF7	PF11_0055	49.23	7	0		Q8I447_Q8I447_PLAF7	PFE0270c	156.34	5	0
	Q8ILC1_STI1L_PLAF7	PF14_0324	66.02	0	5		Q8IAX8_Q8IAX8_PLAF7	PF08_0074	27.24	7	0		Q8I502_Q8I502_PLAF7	PFL2055w	16.06	1	4
	Q8IKT2_Q8IKT2_PLAF7	PF14_0520	52.96	0	5		C0H5H0_C0H5H0_PLAF7	MAL13P1.540	108.12	6	0		Q8IAX8_Q8IAX8_PLAF7	PF08_0074	27.24	3	2
	Q8ILP4_Q8ILP4_PLAF7	PF14_0200	59.88	5	0		O97282_O97282_PLAF7	PFC0900w	59.14	6	0		Q8IIG6_Q8IIG6_PLAF7	PF11_0208	28.75	4	1
	Q8IJA9_Q8IJA9_PLAF7	PF10_0289	42.44	0	5		Q8IFP2_Q8IFP2_PLAF7	PFD1055w	19.71	8	3		Q8ILP4_Q8ILP4_PLAF7	PF14_0200	59.88	4	0
	Q7K6A9_Q7K6A9_PLAF7	MAL8P1.142	30.85	0	5		Q8IIU8_Q8IIU8_PLAF7	PF11_0065	29.75	5	4		C6KT76_C6KT76_PLAF7	PFF1155w	55.23	4	0
	C6KT50_C6KT50_PLAF7	PFF1025c	32.99	0	5		Q8II61_Q8II61_PLAF7	PF11_0313	34.95	8	0		Q8IJ60_Q8IJ60_PLAF7	PF10_0340	104.1	4	0
	Q8I320_Q8I320_PLAF7	PfEF-1beta	32.01	0	5		Q76NN7_Q76NN7_PLAF7	PfCyP19	18.94	8	0		Q8IJD4_RSSA_PLAF7	PF10_0264	29.84	4	0
	Q7KQM0_TPIS_PLAF7	TPI	27.92	0	5		Q8IK90_Q8IK90_PLAF7	PF14_0716	28.82	7	0		Q8IAU3_Q8IAU3_PLAF7	DHPS	83.32	4	0
	Q8I5H4_Q8I5H4_PLAF7	PFL1170w	97.17	0	5		P50250_SAHH_PLAF7	PFE1050w	53.8	7	0		Q8IL88_Q8IL88_PLAF7	PF14_0359	48.44	4	0
	O96198_O96198_PLAF7	PFB0525w	70.45	0	5		Q9TY94_Q9TY94_PLAF7	UAP56	52.19	7	0		Q8I4T1_VPS26_PLAF7	PFL2415w	34.49	4	0
	Q8IL13_Q8IL13_PLAF7	PF14_0437	60	0	5		Q8IBT2_Q8IBT2_PLAF7	MAL7P1.81	37.26	7	0		C6KT82_C6KT82_PLAF7	PFF1185w	315.42	4	0
	Q8IM10_Q8IM10_PLAF7	PF14_0083	25.04	3	5		Q8IIA2_Q8IIA2_PLAF7	PF11_0272	17.88	6	1		Q8IDV0_Q8IDV0_PLAF7	PF13_0214	47.75	4	0
							Q8IJA9_Q8IJA9_PLAF7	PF10_0289	42.44	6	0
							C6KST5_C6KST5_PLAF7	PFF0430w	61.49	6	0
							Q7KQK0_Q7KQK0_PLAF7	PKAr	50.8	6	0
							Q8IAX5_Q8IAX5_PLAF7	PF08_0076	16.28	6	0
							Q8IM38_Q8IM38_PLAF7	PF14_0053	40.57	6	0
							O77323_TCPH_PLAF7	MAL3P3.6	59.54	6	0
							Q8I3J5_Q8I3J5_PLAF7	PFE1345c	109.73	6	0
							C6KSV3_C6KSV3_PLAF7	PfTK	75.77	6	0
							O77396_O77396_PLAF7	PFC0745c	29.27	6	0
							Q8IJ60_Q8IJ60_PLAF7	PF10_0340	104.1	6	0
							Q8ILL3_Q8ILL3_PLAF7	PF14_0230	33.98	6	0
							Q8ID43_Q8ID43_PLAF7	PF13_0349	17	6	0
							Q8ILI2_Q8ILI2_PLAF7	PF14_0261	42.61	6	0
							Q8IJP3_Q8IJP3_PLAF7	PF10_0149	79.46	6	0
							Q8I566_Q8I566_PLAF7	PFL1720w	49.75	6	0
							Q8IKT2_Q8IKT2_PLAF7	PF14_0520	52.96	5	0
							Q7K6A9_Q7K6A9_PLAF7	MAL8P1.142	30.85	5	0
							Q8I3L4_Q8I3L4_PLAF7	PfACS10	76.8	5	0
							Q8I2J4_PROF_PLAF7	Pfn	19.01	5	0
							C0H4U4_C0H4U4_PLAF7	MAL8P1.95	36.23	5	0
							Q8IL88_Q8IL88_PLAF7	PF14_0359	48.44	5	0
							Q76NN6_Q76NN6_PLAF7	PFD0950w	33.18	5	0
							Q8IL48_Q8IL48_PLAF7	PF14_0401	46.41	5	0
							Q8IJC6_Q8IJC6_PLAF7	PF10_0272	44.19	5	4
							Q8IM10_Q8IM10_PLAF7	PF14_0083	25.04	4	4
							O97250_O97250_PLAF7	PFC0300c	30.5	7	1
							C6KST3_C6KST3_PLAF7	PFF0420c	26.51	7	0
							Q8I5S6_Q8I5S6_PLAF7	PFL0625c	165.96	7	0
							Q8IEN3_Q8IEN3_PLAF7	cpsSII	273.27	7	0
							C6KT23_C6KT23_PLAF7	PFF0885w	16.71	5	2
							C0H4A6_C0H4A6_PLAF7	PFD0770c	24.12	5	1
							Q8IKF0_Q8IKF0_PLAF7	H45	45.28	6	0
							Q8IDV2_Q8IDV2_PLAF7	MAL13P1.190	59.03	6	0
							C6KT55_C6KT55_PLAF7	PFF1050w	20.61	6	0
							Q8ID50_Q8ID50_PLAF7	PF13_0346	14.61	5	1
							Q7KQL8_THIO_PLAF7	PF14_0545	11.71	6	0
							Q8IKH8_Q8IKH8_PLAF7	PF14_0627	24.65	5	1
							Q8ILE8_Q8ILE8_PLAF7	PF14_0296	19.28	5	1
							Q8IDG2_Q8IDG2_PLAF7	MAL13P1.270	27.21	5	0
							Q8II60_Q8II60_PLAF7	PF11_0314	49.51	5	0
							Q8I5F9_Q8I5F9_PLAF7	PFL1245w	131.69	5	0
							O97249_RS12_PLAF7	RPS12	15.39	5	0
							Q8IDS6_Q8IDS6_PLAF7	PF13_0224	21.73	5	0
							Q8IDN4_Q8IDN4_PLAF7	MAL13P1.233	24.97	5	0
							C6KTB1_C6KTB1_PLAF7	PFF1335c	20.28	5	0
							Q8IIJ9_CATC_PLAF7	PF11_0174	80.36	5	0
							Q8I3R0_Q8I3R0_PLAF7	PFE1005w	22.11	5	0
							Q8I1S0_Q8I1S0_PLAF7	sar1	22.01	5	0
							Q8I608_Q8I608_PLAF7	PFL0185c	40.46	5	0
							Q8ILY9_Q8ILY9_PLAF7	PF14_0104	51.21	5	0
							Q8I3T8_Q8I3T8_PLAF7	PFE0850c	18.1	5	0
							Q8IC35_Q8IC35_PLAF7	MAL7P1.12	263.01	5	0
							Q8IBS3_Q8IBS3_PLAF7	PF07_0073	62.41	5	0
							O96198_O96198_PLAF7	PFB0525w	70.45	5	0
							C0H4L1_C0H4L1_PLAF7	MAL7P1.202	145.42	5	0
							Q8IET7_Q8IET7_PLAF7	PF13_0014	22.47	5	0
							Q6ZMA8_Q6ZMA8_PLAF7	PFD0305c	55.75	4	0
							Q8IKH3_Q8IKH3_PLAF7	PF14_0632	132.68	4	0
							Q76NL8_Q76NL8_PLAF7	flN	138.78	4	0
							Q8II82_Q8II82_PLAF7	PF11_0292	29.12	4	0
							Q8IJD4_RSSA_PLAF7	PF10_0264	29.84	4	0
							Q8I4R5_Q8I4R5_PLAF7	PFL2505c	262.99	4	0
							Q8ILI6_AN32_PLAF7	PF14_0257	32.99	4	0
							Q8IAW0_Q8IAW0_PLAF7	PF08_0087	61.12	4	0
							Q8I2R8_Q8I2R8_PLAF7	PFI1175c	22.96	4	0
							O96212_O96212_PLAF7	PFB0595w	37.33	4	0
							P61074_PCNA_PLAF7	PCNA	30.57	4	0
							Q8IHR4_Q8IHR4_PLAF7	dyn1	96.31	4	0
							Q8I535_Q8I535_PLAF7	ACS11	92.03	4	0
							Q8I2B1_Q8I2B1_PLAF7	PFA_0145c	73.4	4	0
							Q8IIR7_Q8IIR7_PLAF7	ERC	39.35	4	0
							Q8I5R7_SYP_PLAF7	proRS	86.59	4	0
							Q8I5C4_Q8I5C4_PLAF7	PFL1425w	60.62	4	0
							Q8IL80_Q8IL80_PLAF7	TPx1	21.79	4	0
							O96220_O96220_PLAF7	PFB0635w	60.92	4	0
							Q8I5Y9_Q8I5Y9_PLAF7	PFL0280c	38.99	4	0
							Q7K6A0_Q7K6A0_PLAF7	PfPKAc	40.17	4	0
							Q8IKL5_Q8IKL5_PLAF7	PF14_0589	127.99	4	0
							Q8IM09_Q8IM09_PLAF7	PF14_0084	851.35	6	0
							Q8IDR9_Q8IDR9_PLAF7	PF13_0228	35.36	4	2
							Q8IJD0_Q8IJD0_PLAF7	PF10_0268	43.9	5	0
							O00806_RLA2_PLAF7	MAL3P3.19	11.94	5	0
							Q8IDI5_Q8IDI5_PLAF7	PF13_0268	23.4	2	3
							O77395_O77395_PLAF7	PFC0735w	14.86	3	2
							Q8I603_Q8I603_PLAF7	PFL0210c	17.62	4	1
							Q8IIX0_Q8IIX0_PLAF7	PF11_0043	13.01	5	0

## Sheet: Soluble_ PCA analysis
Gene Symbol	MCMBP 1#	MCMBP 2#	MCMBP 3#	3D7 1#	3D7 2#	3D7 3#		Gene Symbol	PC1	PC2
PF07_0029	111	47	118	33	6	14		PF07_0029	5.556905464651764	-0.736521
PF14_0120	305	155	283	0	0	0		PF14_0120	7.772605528625998	8.497431277276943
PFL0580w	153	23	74	0	0	0		PFL0580w	1.1285895529885788	3.0690440179171214
PF07_0023	89	24	75	0	0	0		PF07_0023	0.626643	2.4163258685136224
PF08_0054	27	46	28	40	11	14		PF08_0054	5.0367701470328115	-3.91362
PF13_0095	109	17	60	0	0	0		PF13_0095	0.468434	2.3784572997365006
PF13_0291	49	14	47	0	0	0		PF13_0291	-0.243162	1.5621602893519304
PF14_0177	29	7	33	0	0	0		PF14_0177	-0.726193	1.1142182887324317
PF13_0304	18	67	24	30	7	15		PF13_0304	4.420607801348831	-2.7442
ENO	8	29	12	30	7	8		ENO	2.6176779862489785	-2.65913
MAL13P1.56	0	27	0	23	0	0		MAL13P1.56	0.10106156056033253	-0.493472
PF14_0341	43	16	48	3	0	1		PF14_0341	-0.0158647	1.2809607805104402
PFI0875w	4	32	5	24	4	5		PFI0875w	1.5272109892099777	-1.6165
PGK	5	33	5	21	5	6		PGK	1.7081961054815602	-1.72973
GAPDH	11	43	11	24	5	5		GAPDH	2.0871465274579633	-1.53453
PfPDI-8	2	17	5	18	0	2		PfPDI-8	-0.0797608	-0.481629
PF14_0425	11	18	17	21	3	7		PF14_0425	1.2732654471599063	-1.43249
PFI0235w	19	13	28	0	0	0		PFI0235w	-0.718112	1.0127627541063535
PFI0755c	4	19	8	14	0	0		PFI0755c	-0.339989	-0.00123758
PFL1070c	3	23	8	14	0	1		PFL1070c	-0.155153	-0.0739859
PfPMT	7	20	10	14	5	6		PfPMT	1.1799168206437107	-1.44361
PfLDH	5	22	7	17	6	10		PfLDH	1.863240929109607	-2.21813
PfSAMS	7	9	14	12	1	7		PfSAMS	0.2784759451061242	-0.810194
PF14_0486	3	22	7	20	0	3		PF14_0486	0.24823317630751032	-0.597147
MSP1	0	18	0	9	0	0		MSP1	-0.684891	0.0967256
PFE0585c	0	18	0	9	0	0		PFE0585c	-0.684891	0.0967256
PF10_0154	0	7	13	0	0	0		PF10_0154	-1.17919	0.5740780158428295
PF10_0272	0	0	14	0	0	10		PF10_0272	-0.367514	-0.526432
PfRACK	4	11	4	7	2	3		PfRACK	-0.221108	-0.455011
Ran	4	10	6	7	1	6		Ran	-0.106879	-0.576905
ACC1	3	0	3	7	0	7		ACC1	-0.464006	-0.653952
PF14_0084	ND	0	7	0	0	0		PF14_0084	-1.26975	0.6079521174423134
OAT	6	11	5	11	1	6		OAT	0.0861354	-0.75255
PFC0285c	7	9	14	5	0	0		PFC0285c	-0.858539	0.43615897138457016
PF13_0228	ND	0	6	0	0	9		PF13_0228	-0.407577	-0.339063
PfCyP19	1	8	7	6	0	0		PfCyP19	-0.965693	0.23157929744912825
PFE0350c	5	8	8	10	4	6		PFE0350c	0.5171311926369666	-1.24097
PFF1300w	5	22	8	12	6	5		PFF1300w	1.1855717963600905	-1.44249
PFF0660w	13	9	23	0	0	0		PFF0660w	-0.917138	0.8491902181337551
PF10_0084	1	12	5	7	2	2		PF10_0084	-0.308661	-0.360576
MAL13P1.283	0	15	6	0	0	0		MAL13P1.283	-1.06014	0.5754951136221838
PfGSK-3	0	0	6	0	0	0		PfGSK-3	-1.4211	0.419051
DHPS	0	0	4	0	0	0		DHPS	-1.44209	0.39561681758221934
PFD1055w	6	8	7	7	3	5		PFD1055w	0.12246152493716841	-0.81477
PF11_0208	1	12	4	8	1	1		PF11_0208	-0.549034	-0.140366
PFE1345c	22	6	34	0	0	0		PFE1345c	-0.798442	1.0416924456063448
PF14_0517	0	14	0	7	0	0		PF14_0517	-0.862486	0.15273067945739577
PfEF-1beta	0	0	0	5	0	0		PfEF-1beta	-1.28072	0.10443968472832826
TPI	0	8	0	5	0	0		TPI	-1.08821	0.18787652888293732
PFL1170w	0	8	0	5	0	0		PFL1170w	-1.08821	0.18787652888293732
PFB0525w	0	5	0	5	0	0		PFB0525w	-1.1604	0.15658771232495883
PF14_0437	0	0	0	5	0	0		PF14_0437	-1.28072	0.10443968472832826
PCNA	0	4	0	6	0	0		PCNA	-1.14379	0.0972964
PF13_0262	0	10	0	6	0	0		PF13_0262	-0.999411	0.15987399865084045
PF14_0359	4	5	4	6	0	0		PF14_0359	-1.04422	0.1967734514010967
PF08_0074	1	7	3	6	0	2		PF08_0074	-0.83781	-0.0335628
PF13_0316	2	0	4	5	0	3		PF13_0316	-0.931086	-0.139368
MAL7P1.122	1	8	0	5	0	0		MAL7P1.122	-1.07983	0.19842129234462252
PFC0300c	1	7	0	5	0	0		PFC0300c	-1.10389	0.18799168682529638
PF13_0224	0	5	0	6	0	0		PF13_0224	-1.11973	0.10772597105420982
PF07_0112	0	9	0	6	0	0		PF07_0112	-1.02348	0.14944439313151436
PF14_0075	0	7	0	5	0	0		PF14_0075	-1.11227	0.17744692336361112
PF14_0324	0	9	0	5	0	0		PF14_0324	-1.06414	0.1983061344022634
PF14_0520	0	5	0	5	0	0		PF14_0520	-1.1604	0.15658771232495883
PF10_0289	0	6	4	5	0	2		PF10_0289	-0.900432	0.0060417
MAL8P1.142	0	5	0	5	0	0		MAL8P1.142	-1.1604	0.15658771232495883
PFF1025c	0	10	0	5	0	0		PFF1025c	-1.04008	0.20873573992158953
PfTK	0	6	0	0	0	0		PfTK	-1.33969	0.41132602419803044
